# Supplementary material
Source: publisher figshare collection journal article supplement (https://gsajournals.figshare.com/ndownloader/files/15611678)
Supplement: Supplementary file 1 [file 15611678]

## Sheet: Mut_ovar_vs_WT_ovar
Supplemental Tablel S2: Adult gonad amh mutant vs. wild-type gonad RNA-seq data, Differentially expressed genes.
gene ID	gene name	baseMean	log2FoldChange	FoldUp MutOvVWOv	FoldDownMutOvVWOv	lfcSE	stat	pvalue	padj	human gene ID (multi)	gene name	human gene ID (single)	gene name
ENSDARG00000092233	vtg1	63.737	25.515	4.79489e+07	2.08555e-08	2.72402	9.36667	7.48572e-21	7.75258e-18
ENSDARG00000055809	vtg2	19.6993	23.6367	1.30423e+07	7.66737e-08	3.11106	7.59764	3.01588e-14	4.30813e-12
ENSDARG00000078429	vtg4	20.8542	23.5811	1.25495e+07	7.96842e-08	3.0514	7.72796	1.09284e-14	1.74124e-12
ENSDARG00000092126	vtg5	30.2799	8.55985	377.373	0.0026499	1.4693	5.82582	5.68336e-09	1.65569e-07
ENSDARG00000016825	vtg6	6.24093	8.25394	305.269	0.0032758	2.11131	3.90939	9.25295e-05	0.000697947
ENSDARG00000092419	vtg7	25.2419	8.11537	277.313	0.00360603	1.9778	4.10324	4.074e-05	0.000348122
ENSDARG00000055370	zgc:163121	1.45772	6.46561	88.3776	0.0113151	1.28767	5.02118	5.13541e-07	8.12603e-06
ENSDARG00000053544	hspa4l	12.86	5.23071	37.5493	0.0266317	1.09829	4.7626	1.91112e-06	2.53263e-05	ENSG00000164070	HSPA4L	ENSG00000164070	HSPA4L
ENSDARG00000008450	pcolce2a	5.16507	5.17649	36.1642	0.0276517	1.12113	4.6172	3.88947e-06	4.65947e-05	ENSG00000163710	PCOLCE2	ENSG00000163710	PCOLCE2
ENSDARG00000017174	dlx2b	8.53583	5.15741	35.6891	0.0280198	1.01207	5.09589	3.47103e-07	5.83567e-06
ENSDARG00000026165	col11a1a	303.198	4.98339	31.6338	0.0316118	1.10879	4.49443	6.97562e-06	7.70181e-05
ENSDARG00000100969	tmprss13a	4.15715	4.53757	23.2244	0.0430581	1.19216	3.80619	0.000141123	0.00100003	ENSG00000137747	TMPRSS13	ENSG00000137747	TMPRSS13
ENSDARG00000016448	vtg3	5.15034	4.33794	20.2232	0.0494482	1.40333	3.09117	0.00199372	0.00933242
ENSDARG00000061547	zgc:153409	2.97681	4.1963	18.3321	0.0545492	1.06038	3.95737	7.5781e-05	0.000587665
ENSDARG00000036832	cyt1l	6.40632	4.12319	17.4262	0.0573848	1.42314	2.89725	0.00376444	0.0158417	ENSG00000186393	KRT26
ENSDARG00000026904	cbln13	12.3409	4.01396	16.1556	0.0618982	0.817661	4.90908	9.15065e-07	1.3376e-05
ENSDARG00000060639	apba2b	15.756	3.95288	15.4858	0.0645751	0.557634	7.08866	1.35416e-12	1.30459e-10	ENSG00000034053	APBA2	ENSG00000034053	APBA2
ENSDARG00000044002	cyp2x7	24.1868	3.92725	15.2132	0.0657325	0.961778	4.08332	4.43963e-05	0.000375493
ENSDARG00000075958	si:dkey-266f7.9	29.8087	3.90522	14.9826	0.066744	1.20564	3.23912	0.001199	0.00612059
ENSDARG00000089963	hbbe1.1	6.3629	3.88795	14.8044	0.0675476	1.44128	2.69758	0.00698461	0.0264725	ENSG00000196565	HBG2
ENSDARG00000093345	si:ch73-27e22.7	3.44294	3.87423	14.6642	0.0681932	1.05103	3.68613	0.000227686	0.00150481
ENSDARG00000092947	cyt1	66.6023	3.84866	14.4066	0.0694127	0.961321	4.00351	6.24098e-05	0.000499496	ENSG00000186393	KRT26
ENSDARG00000051778	zgc:194989	8.33934	3.81447	14.0693	0.071077	0.601541	6.34117	2.28029e-10	1.08081e-08	ENSG00000146047	HIST1H2BA	ENSG00000146047	HIST1H2BA
ENSDARG00000052912	si:dkey-57n24.6	49.0946	3.81192	14.0444	0.0712029	1.35796	2.80708	0.00499923	0.020091	ENSG00000187695	AC112484.1	ENSG00000187695	AC112484.1
ENSDARG00000007080	rhcgl1	24.3089	3.80169	13.9452	0.0717094	1.18619	3.20497	0.00135076	0.00674177	ENSG00000140519	RHCG	ENSG00000140519	RHCG
ENSDARG00000019342	chrnd	20.0368	3.75826	13.5316	0.0739009	1.16481	3.2265	0.00125316	0.00634795	ENSG00000135902	CHRND	ENSG00000135902	CHRND
ENSDARG00000061480	si:ch211-132b12.1	3.04478	3.74807	13.4364	0.0744247	1.30229	2.87807	0.00400122	0.0166822
ENSDARG00000079462	si:ch211-131k2.3	16.9035	3.73163	13.2841	0.0752777	1.10045	3.39099	0.000696395	0.00387649
ENSDARG00000105341	si:dkey-9l20.3	1.45399	3.69489	12.9501	0.0772195	1.53878	2.40119	0.0163419	0.0528642
ENSDARG00000100694	tnnt2b	4.1616	3.64747	12.5313	0.0797999	1.16947	3.11892	0.00181518	0.00863831	ENSG00000118194	TNNT2	ENSG00000118194	TNNT2
ENSDARG00000098970	HIST1H3I	5.31714	3.63177	12.3958	0.0806728	0.660214	5.50091	3.77841e-08	8.53459e-07	ENSG00000168148	HIST3H3
ENSDARG00000074696	zgc:194621	5.10249	3.60571	12.1738	0.0821434	1.05643	3.41311	0.000642259	0.00362187
ENSDARG00000053708	ghrhrb	4.60584	3.60399	12.1593	0.0822414	1.13567	3.17344	0.00150644	0.00737656
ENSDARG00000105397	CU459186.7	2.26188	3.58924	12.0356	0.0830869	1.27424	2.81676	0.00485103	0.0195866	ENSG00000146047	HIST1H2BA	ENSG00000146047	HIST1H2BA
ENSDARG00000103154	si:ch73-144l3.1	36.0982	3.56068	11.7998	0.0847475	1.20924	2.94457	0.00323405	0.0139295	ENSG00000104228	TRIM35	ENSG00000104228	TRIM35
ENSDARG00000059534		8.23573	3.55412	11.7461	0.0851343	1.18605	2.99659	0.00273016	0.0121378
ENSDARG00000105400	HIST2H2AB (1 of many)	3.69799	3.53119	11.561	0.086498	0.883669	3.99606	6.44063e-05	0.000511914	ENSG00000184270	HIST2H2AB	ENSG00000184270	HIST2H2AB
ENSDARG00000078760	cacna2d3	4.73159	3.53075	11.5574	0.0865246	1.09394	3.22756	0.00124851	0.006329	ENSG00000157445	CACNA2D3	ENSG00000157445	CACNA2D3
ENSDARG00000051736	zgc:114037	2.61007	3.51416	11.4253	0.0875253	0.83232	4.22212	2.42016e-05	0.00022359	ENSG00000184270	HIST2H2AB	ENSG00000184270	HIST2H2AB
ENSDARG00000093249	si:ch211-226h8.11	115.575	3.51365	11.4213	0.0875558	1.66962	2.10446	0.035338	0.0988329
ENSDARG00000091912	si:ch211-15j1.5	9.90745	3.49593	11.2818	0.0886381	1.02299	3.41736	0.000632311	0.00357843
ENSDARG00000103031	znf1029	2.03675	3.49257	11.2556	0.088845	1.23792	2.82133	0.00478254	0.0193554
ENSDARG00000054026	mustn1a	14.5373	3.4806	11.1626	0.0895847	0.895107	3.88848	0.000100875	0.000748894	ENSG00000243696	AC006254.1
ENSDARG00000100024	HIST2H2AB (1 of many)	2.48933	3.44154	10.8644	0.0920433	0.634754	5.42186	5.89836e-08	1.26342e-06	ENSG00000184270	HIST2H2AB	ENSG00000184270	HIST2H2AB
ENSDARG00000104205	cfhl3	31.5941	3.43728	10.8324	0.0923159	1.16824	2.94227	0.00325812	0.0140127
ENSDARG00000095328	si:ch211-191i18.4	3.08373	3.42916	10.7716	0.0928368	0.734413	4.66925	3.023e-06	3.74046e-05
ENSDARG00000093835	si:ch211-165f21.4	12.5401	3.41396	10.6587	0.0938198	1.1597	2.94383	0.0032418	0.013957
ENSDARG00000056907	si:rp71-45g20.10	4.72319	3.39864	10.5461	0.0948217	1.27262	2.67059	0.00757185	0.0282944	ENSG00000122257	RBBP6	ENSG00000122257	RBBP6
ENSDARG00000054931	ppp2r5b	7.26558	3.39406	10.5127	0.095123	1.04704	3.24156	0.00118876	0.00607822	ENSG00000068971	PPP2R5B	ENSG00000068971	PPP2R5B
ENSDARG00000105328	si:dkey-23a13.17	1.77645	3.3848	10.4454	0.0957355	1.22733	2.75785	0.00581829	0.0227557	ENSG00000124575	HIST1H1D
ENSDARG00000096992	zgc:153405	4.6573	3.38421	10.4412	0.0957745	0.749529	4.51512	6.32796e-06	7.0811e-05	ENSG00000124575	HIST1H1D
ENSDARG00000100900	si:ch211-183d5.2	3.35088	3.37872	10.4015	0.0961401	1.21088	2.7903	0.00526591	0.0209796
ENSDARG00000098278	FO904867.1	7.79222	3.34058	10.1301	0.0987155	1.11158	3.00525	0.00265359	0.0118482	ENSG00000275395	FCGBP	ENSG00000275395	FCGBP
ENSDARG00000058479	zgc:110425	39.0529	3.33699	10.105	0.0989611	0.95954	3.4777	0.000505729	0.00296495	ENSG00000124575	HIST1H1D
ENSDARG00000089719		1.45128	3.3327	10.075	0.099256	1.05687	3.15338	0.00161391	0.00782511	ENSG00000146047	HIST1H2BA	ENSG00000146047	HIST1H2BA
ENSDARG00000023181	pcp4l1	12.7611	3.32776	10.0405	0.0995967	1.2226	2.72187	0.00649144	0.0249318	ENSG00000248485	PCP4L1	ENSG00000248485	PCP4L1
ENSDARG00000078419	filip1a	32.1318	3.32344	10.0105	0.0998954	1.1084	2.99842	0.00271385	0.0120886	ENSG00000118407	FILIP1	ENSG00000118407	FILIP1
ENSDARG00000062806	ttll9	16.1032	3.31443	9.94814	0.100521	0.988854	3.35179	0.000802922	0.00436049	ENSG00000131044	TTLL9	ENSG00000131044	TTLL9
ENSDARG00000068678	iqcg	17.1481	3.30079	9.85454	0.101476	1.2532	2.63388	0.00844143	0.0308754	ENSG00000114473	IQCG	ENSG00000114473	IQCG
ENSDARG00000075463	mss51	21.5656	3.29634	9.82422	0.101789	0.735847	4.47966	7.4763e-06	8.15543e-05	ENSG00000166343	MSS51	ENSG00000166343	MSS51
ENSDARG00000070668	cd4-1	6.73864	3.28591	9.75346	0.102528	1.22602	2.68016	0.0073588	0.0276292
ENSDARG00000051735	si:ch211-113a14.18	2.93517	3.27755	9.69705	0.103124	0.984583	3.32887	0.000872003	0.00466231	ENSG00000124575	HIST1H1D
ENSDARG00000045089	si:ch211-270n8.1	180.128	3.27039	9.64904	0.103637	1.40717	2.32409	0.0201206	0.0626985	ENSG00000132703	APCS
ENSDARG00000001414	mctp2a	8.57851	3.2678	9.63175	0.103823	0.921621	3.54571	0.000391561	0.00237355	ENSG00000140563	MCTP2	ENSG00000140563	MCTP2
ENSDARG00000102806	zgc:112234	3.68993	3.26693	9.62599	0.103885	0.72841	4.48502	7.29074e-06	7.98589e-05	ENSG00000146047	HIST1H2BA	ENSG00000146047	HIST1H2BA
ENSDARG00000006911	wnt8b	1.32482	3.2609	9.5858	0.104321	1.51091	2.15824	0.0309091	0.0889441	ENSG00000075290	WNT8B	ENSG00000075290	WNT8B					WNT8A, almost exclusively in testis	Developmentally regulated Wnt signaling mediators identified through transcriptional profiling of wild-type and AhCre Ctnnb1fl/fl mouse testes identified Wnt receptors (e.g., Fzd4) and ligands (e.g., Wnt3, Wnt3a, Wnt5b, Wnt7a, and Wnt8b).
ENSDARG00000089039	zgc:173585	10.187	3.25308	9.53399	0.104888	0.549479	5.9203	3.21364e-09	1.03466e-07	ENSG00000146047	HIST1H2BA	ENSG00000146047	HIST1H2BA
ENSDARG00000095966	zgc:171699	24.2381	3.23004	9.38294	0.106576	1.05244	3.06911	0.00214698	0.00992201
ENSDARG00000041685		468.491	3.21597	9.29186	0.107621	0.908493	3.53989	0.000400287	0.00241936
ENSDARG00000061762	trim108	12.3709	3.20399	9.21503	0.108518	1.25063	2.56189	0.0104104	0.0366843	ENSG00000183439	TRIM61	ENSG00000183439	TRIM61
ENSDARG00000105355	zgc:154164	2.31263	3.20219	9.20358	0.108653	1.23692	2.58885	0.00962974	0.0343483	ENSG00000276966	HIST1H4E	ENSG00000276966	HIST1H4E
ENSDARG00000076321	col28a2a	29.0056	3.19626	9.16577	0.109102	1.39838	2.28569	0.0222724	0.0681631
ENSDARG00000062828		1.70536	3.18472	9.09275	0.109978	1.35245	2.35478	0.0185339	0.0587425
ENSDARG00000079892	si:dkey-183c2.4	54.8671	3.15551	8.91053	0.112227	1.11382	2.83304	0.00461072	0.01877	ENSG00000196576	PLXNB2	ENSG00000196576	PLXNB2
ENSDARG00000095294	si:dkey-200l5.4	9.80147	3.11779	8.68055	0.1152	1.17581	2.6516	0.00801112	0.0296311
ENSDARG00000061383	serpinf2b	348.877	3.11417	8.65882	0.115489	1.14925	2.70974	0.00673357	0.0256902	ENSG00000167711	SERPINF2	ENSG00000167711	SERPINF2
ENSDARG00000086552	HIST2H2AB (1 of many)	5.47269	3.11397	8.65762	0.115505	0.520921	5.97782	2.26148e-09	7.62901e-08	ENSG00000184270	HIST2H2AB	ENSG00000184270	HIST2H2AB
ENSDARG00000100133	lect1	19.6098	3.11013	8.63459	0.115813	0.44976	6.91509	4.67577e-12	3.76845e-10	ENSG00000136110	CNMD	ENSG00000136110	CNMD
ENSDARG00000078246	si:ch211-114l13.4	9.05496	3.10899	8.62776	0.115905	1.26168	2.46416	0.0137334	0.0458436
ENSDARG00000068966	si:ch211-261n11.7	13.4975	3.10469	8.60212	0.11625	1.07507	2.88791	0.00387816	0.0162345	ENSG00000157873	TNFRSF14	ENSG00000157873	TNFRSF14
ENSDARG00000105201	adcyap1r1a	7.05337	3.09946	8.57096	0.116673	1.25485	2.46999	0.0135117	0.0452567	ENSG00000078549	ADCYAP1R1	ENSG00000078549	ADCYAP1R1
ENSDARG00000099864	si:ch73-170d6.2	5.95152	3.09753	8.55954	0.116829	1.15467	2.6826	0.00730518	0.0274664
ENSDARG00000088686	HIST2H2AB (1 of many)	2.1136	3.08867	8.50713	0.117549	0.797806	3.87146	0.000108186	0.000796044	ENSG00000184270	HIST2H2AB	ENSG00000184270	HIST2H2AB
ENSDARG00000105444	HIST2H2AB (1 of many)	2.96718	3.07831	8.44627	0.118395	0.877207	3.50922	0.000449421	0.00267523	ENSG00000184270	HIST2H2AB	ENSG00000184270	HIST2H2AB
ENSDARG00000095504	si:ch211-167j6.3	43.1079	3.0535	8.30223	0.12045	1.09094	2.79897	0.00512666	0.0205156
ENSDARG00000061576	gldn	9.56629	3.04909	8.27691	0.120818	1.11908	2.72464	0.00643707	0.0247643	ENSG00000186417	GLDN	ENSG00000186417	GLDN
ENSDARG00000063089	ccm2l	5.5132	3.04825	8.27207	0.120889	0.913226	3.33789	0.000844173	0.00454519	ENSG00000101331	CCM2L	ENSG00000101331	CCM2L
ENSDARG00000070344	or137-3	1.61941	3.04113	8.23134	0.121487	0.86281	3.52468	0.000423995	0.00254557
ENSDARG00000031489	ogn	31.8039	3.03881	8.21811	0.121683	0.618864	4.91029	9.09399e-07	1.33025e-05	ENSG00000106809	OGN	ENSG00000106809	OGN
ENSDARG00000100366	si:dkey-102m7.3	28.7476	3.03753	8.21087	0.12179	0.49527	6.13309	8.61907e-10	3.39405e-08
ENSDARG00000105483	zgc:112234	3.64234	3.028	8.1568	0.122597	0.747145	4.05277	5.06158e-05	0.000418191	ENSG00000146047	HIST1H2BA	ENSG00000146047	HIST1H2BA
ENSDARG00000105314	HIST2H2AB (1 of many)	5.7786	3.02222	8.12419	0.123089	0.413464	7.30952	2.68098e-13	3.06802e-11	ENSG00000184270	HIST2H2AB	ENSG00000184270	HIST2H2AB
ENSDARG00000006008	dct	5.87189	3.02192	8.1225	0.123115	0.640619	4.7172	2.39118e-06	3.06214e-05	ENSG00000080166	DCT	ENSG00000080166	DCT
ENSDARG00000086647	chrng	3.78337	3.0189	8.10551	0.123373	0.689719	4.377	1.20322e-05	0.000122108	ENSG00000196811	CHRNG	ENSG00000196811	CHRNG
ENSDARG00000104441	hspb7	7.32691	3.01821	8.10163	0.123432	1.1467	2.63208	0.00848639	0.0310009	ENSG00000173641	HSPB7	ENSG00000173641	HSPB7
ENSDARG00000088420	hist1h4l	1.50894	3.01206	8.06717	0.123959	0.940542	3.20248	0.00136251	0.00679713	ENSG00000275663	HIST1H4G	ENSG00000275663	HIST1H4G
ENSDARG00000045808	rlbp1b	1.57874	3.01084	8.06036	0.124064	1.23097	2.44591	0.0144485	0.0477918	ENSG00000140522	RLBP1	ENSG00000140522	RLBP1
ENSDARG00000042387	zgc:77752	5.86646	3.00074	8.00408	0.124936	0.941004	3.18886	0.00142833	0.00706085
ENSDARG00000103843	spag8	18.6468	2.99339	7.9634	0.125574	0.953836	3.13826	0.00169954	0.00816196	ENSG00000137098	SPAG8	ENSG00000137098	SPAG8
ENSDARG00000097596	tac3b	1.78184	2.99222	7.95695	0.125676	1.00175	2.987	0.00281733	0.0124638
ENSDARG00000100794	mmp13b	48.9874	2.99166	7.95386	0.125725	0.695129	4.30374	1.67938e-05	0.000162851	ENSG00000137745	MMP13	ENSG00000137745	MMP13
ENSDARG00000087543	hist1h4l	3.06756	2.99084	7.94937	0.125796	0.794763	3.76319	0.000167761	0.0011552	ENSG00000274618	HIST1H4F	ENSG00000274618	HIST1H4F
ENSDARG00000038297	aspdh	19.2143	2.97317	7.85262	0.127346	1.24829	2.3818	0.0172285	0.0553175	ENSG00000204653	ASPDH	ENSG00000204653	ASPDH
ENSDARG00000041073	si:dkey-12e7.4	8.58193	2.96259	7.79521	0.128284	1.13063	2.62031	0.008785	0.0318843
ENSDARG00000105366	HIST2H2AB (1 of many)	2.90928	2.96259	7.79521	0.128284	0.774158	3.82685	0.000129793	0.000931529	ENSG00000184270	HIST2H2AB	ENSG00000184270	HIST2H2AB
ENSDARG00000105590	si:cabz01007794.1	4.56885	2.96196	7.79184	0.128339	1.05968	2.79516	0.00518745	0.0207188
ENSDARG00000092561	pimr201	10.7629	2.96074	7.78525	0.128448	1.19732	2.4728	0.0134058	0.0450112
ENSDARG00000101951	EXTL1	9.0724	2.95683	7.76414	0.128797	1.13673	2.60117	0.00929072	0.0333863	ENSG00000158008	EXTL1	ENSG00000158008	EXTL1
ENSDARG00000034423	sncga	29.6261	2.93674	7.65678	0.130603	1.15235	2.54847	0.0108196	0.0378686	ENSG00000173267	SNCG	ENSG00000173267	SNCG
ENSDARG00000104387	slc4a5	45.6689	2.91281	7.53084	0.132787	1.06766	2.72822	0.00636775	0.0245295	ENSG00000188687	SLC4A5	ENSG00000188687	SLC4A5
ENSDARG00000034470	aldoab	1017.2	2.90954	7.51377	0.133089	1.04471	2.78501	0.00535265	0.021272	ENSG00000149925	ALDOA	ENSG00000149925	ALDOA
ENSDARG00000096579	si:dkey-9c18.3	4.90073	2.90461	7.48814	0.133545	0.68623	4.2327	2.30903e-05	0.000214784
ENSDARG00000055278	cfb	545.482	2.90099	7.46939	0.13388	1.08764	2.66723	0.00764787	0.0285321	ENSG00000244255	AL645922.1
ENSDARG00000100886	si:dkeyp-97a10.1	45.2551	2.89758	7.45175	0.134197	0.684601	4.2325	2.31103e-05	0.000214849
ENSDARG00000087863	cd44a	27.6491	2.88456	7.38483	0.135413	1.16379	2.47859	0.0131905	0.0444901
ENSDARG00000019417	gadd45ga	56.4175	2.87841	7.35338	0.135992	0.503272	5.71939	1.06908e-08	2.89841e-07	ENSG00000130222	GADD45G	ENSG00000130222	GADD45G
ENSDARG00000093651	ftr25	8.80085	2.87041	7.31275	0.136747	1.16422	2.46552	0.0136814	0.0457216	ENSG00000132481	TRIM47	ENSG00000132481	TRIM47
ENSDARG00000054137	adgrg6	32.3252	2.85644	7.24228	0.138078	0.456379	6.25893	3.87619e-10	1.67966e-08	ENSG00000112414	ADGRG6	ENSG00000112414	ADGRG6
ENSDARG00000075177	ribc2	53.0268	2.84805	7.20027	0.138884	1.15719	2.46118	0.0138481	0.0461671	ENSG00000128408	RIBC2	ENSG00000128408	RIBC2
ENSDARG00000038666	igfbp1b	22.654	2.83203	7.12078	0.140434	0.913333	3.10077	0.00193019	0.00909878	ENSG00000146678	IGFBP1	ENSG00000146678	IGFBP1
ENSDARG00000034667	CABZ01090041.1	9.60772	2.83121	7.11669	0.140515	0.602955	4.69555	2.65891e-06	3.35e-05
ENSDARG00000037178	zic2b	2.3893	2.83019	7.11168	0.140614	0.623077	4.54228	5.56489e-06	6.309e-05	ENSG00000043355	ZIC2	ENSG00000043355	ZIC2
ENSDARG00000100292	fam166b	67.7294	2.82953	7.10842	0.140678	0.787221	3.59433	0.000325232	0.00203915	ENSG00000215187	FAM166B	ENSG00000215187	FAM166B
ENSDARG00000070775	cyp2x9	289.426	2.82572	7.08967	0.14105	1.13705	2.48514	0.0129501	0.0438008
ENSDARG00000002576	cabp5a	2.94447	2.82342	7.0784	0.141275	1.27057	2.22217	0.0262718	0.0781176
ENSDARG00000100259	zgc:171759	4.88174	2.81835	7.05355	0.141773	0.64624	4.36115	1.29381e-05	0.000129593	ENSG00000146047	HIST1H2BA	ENSG00000146047	HIST1H2BA
ENSDARG00000025607	ifnphi1	1.99569	2.8066	6.99633	0.142932	0.858137	3.27057	0.00107331	0.00556342
ENSDARG00000099162	BX005392.4	1.33208	2.80629	6.99482	0.142963	1.14021	2.46121	0.0138469	0.0461671	ENSG00000158683	PKD1L1
ENSDARG00000088330	HBZ	4.71539	2.79281	6.92978	0.144305	1.29056	2.16403	0.0304624	0.0879276	ENSG00000130656	HBZ	ENSG00000130656	HBZ
ENSDARG00000087225	si:ch73-361p23.3	4.09953	2.78795	6.90647	0.144792	1.05939	2.63165	0.00849722	0.0310192
ENSDARG00000105212	cfhl1	30.8201	2.78691	6.90149	0.144896	1.31528	2.11887	0.0341013	0.096153
ENSDARG00000017860	rgs5b	35.935	2.78629	6.89851	0.144959	0.38637	7.21145	5.53595e-13	5.88031e-11	ENSG00000143333	RGS16	ENSG00000143333	RGS16
ENSDARG00000035665	si:dkey-267n13.1	5.80501	2.78214	6.8787	0.145376	0.839661	3.3134	0.000921676	0.00488503
ENSDARG00000070810	ccka	5.79056	2.77564	6.84779	0.146033	1.31156	2.11629	0.0343205	0.096692	ENSG00000187094	CCK	ENSG00000187094	CCK
ENSDARG00000014858	drd2l	7.38271	2.77523	6.84586	0.146074	1.28781	2.15501	0.0311611	0.0894952
ENSDARG00000071046	bbip1	31.1226	2.77433	6.84158	0.146165	0.274084	10.1222	4.40529e-24	8.29517e-21
ENSDARG00000075629		6.42802	2.76326	6.78931	0.14729	0.931609	2.96612	0.00301583	0.0131787	ENSG00000216490	IFI30	ENSG00000216490	IFI30
ENSDARG00000069017	elnb	65.4708	2.76201	6.78338	0.147419	1.18298	2.33478	0.0195547	0.0612578
ENSDARG00000002230	sypb	13.2723	2.75985	6.77324	0.14764	0.918743	3.00394	0.0026651	0.0118945	ENSG00000102003	SYP	ENSG00000102003	SYP
ENSDARG00000073824	RASGRF1	4.88709	2.75873	6.768	0.147754	1.20213	2.29486	0.021741	0.0668332	ENSG00000058335	RASGRF1	ENSG00000058335	RASGRF1
ENSDARG00000105384	si:dkey-23a13.22	5.04425	2.75515	6.75123	0.148121	0.696312	3.95677	7.59692e-05	0.000588903	ENSG00000146047	HIST1H2BA	ENSG00000146047	HIST1H2BA
ENSDARG00000087390	hbbe1.3	6.67219	2.75361	6.74403	0.148279	1.25519	2.19378	0.0282512	0.0829273	ENSG00000196565	HBG2
ENSDARG00000007086	aqp10a	141.864	2.75314	6.74185	0.148327	1.28947	2.13509	0.0327535	0.0931324	ENSG00000143595	AQP10	ENSG00000143595	AQP10
ENSDARG00000079414	sez6b	3.07402	2.75232	6.738	0.148412	0.846035	3.2532	0.00114113	0.00587088	ENSG00000063015	SEZ6	ENSG00000063015	SEZ6
ENSDARG00000062943	taco1	10.2979	2.75129	6.73318	0.148518	1.03469	2.65903	0.00783649	0.02911	ENSG00000136463	TACO1	ENSG00000136463	TACO1
ENSDARG00000055996	rps8a	3280.37	2.74884	6.72177	0.14877	0.269015	10.2182	1.64426e-24	4.2572e-21	ENSG00000142937	RPS8	ENSG00000142937	RPS8
ENSDARG00000101645	MYRFL	124.499	2.74697	6.71303	0.148964	1.26487	2.17173	0.029876	0.0866577	ENSG00000166268	MYRFL	ENSG00000166268	MYRFL
ENSDARG00000094554	si:ch73-7i4.1	5.06822	2.73575	6.66104	0.150127	0.76843	3.56018	0.000370605	0.00226708
ENSDARG00000079632		25.314	2.73385	6.6523	0.150324	0.535005	5.10996	3.22224e-07	5.5052e-06	ENSG00000256514	AP003419.1
ENSDARG00000070539	arf3a	5.92558	2.7252	6.61254	0.151228	1.19171	2.2868	0.0222075	0.0679846
ENSDARG00000061011	hlfb	4.68049	2.71098	6.54768	0.152726	1.02389	2.64774	0.00810318	0.0299129	ENSG00000108924	HLF	ENSG00000108924	HLF
ENSDARG00000105607	si:dkey-183c6.9	40.5278	2.71075	6.5466	0.152751	1.28417	2.1109	0.034781	0.0976839
ENSDARG00000093135	si:dkey-117n7.2	1.37605	2.70305	6.51177	0.153568	1.05556	2.56077	0.010444	0.0367778
ENSDARG00000061365	hepacam2	9.78627	2.69281	6.46573	0.154662	0.870459	3.09356	0.00197773	0.00927126	ENSG00000188175	HEPACAM2	ENSG00000188175	HEPACAM2
ENSDARG00000086288	scg3	39.8385	2.68906	6.44893	0.155065	0.357166	7.52888	5.1179e-14	6.92857e-12	ENSG00000104112	SCG3	ENSG00000104112	SCG3
ENSDARG00000089519	fbln7	7.56812	2.68352	6.42421	0.155661	1.10075	2.43791	0.0147724	0.0485839	ENSG00000144152	FBLN7	ENSG00000144152	FBLN7
ENSDARG00000096897	si:dkey-90a13.10	9.21095	2.68283	6.42113	0.155736	0.715806	3.74798	0.000178264	0.0012154	ENSG00000257987	TEX49	ENSG00000257987	TEX49
ENSDARG00000055506	si:ch211-37e10.1	12.8796	2.68051	6.41081	0.155987	1.07095	2.50292	0.0123174	0.0420175
ENSDARG00000061714	si:dkey-45k15.1	40.7913	2.67547	6.38848	0.156532	0.832148	3.21514	0.00130381	0.00655958	ENSG00000205436	EXOC3L4	ENSG00000205436	EXOC3L4
ENSDARG00000102261		15.1243	2.6726	6.37576	0.156844	0.387337	6.89992	5.20313e-12	4.09781e-10	ENSG00000160188	RSPH1	ENSG00000160188	RSPH1
ENSDARG00000099121	si:dkey-6d5.1	3.59955	2.66962	6.36262	0.157168	0.928474	2.87528	0.00403672	0.0168099
ENSDARG00000028164	cst14a.1	11.0746	2.66472	6.34104	0.157703	0.431401	6.1769	6.53741e-10	2.6603e-08	ENSG00000121552	CSTA
ENSDARG00000105374	CU457819.1	3.35108	2.6563	6.30415	0.158626	0.701958	3.78413	0.000154246	0.00107935
ENSDARG00000038556	zgc:112185	26.8385	2.65222	6.28633	0.159075	0.338143	7.84348	4.38241e-15	7.89329e-13	ENSG00000182307	C8orf33	ENSG00000182307	C8orf33
ENSDARG00000054319	oxct1b	168.118	2.64908	6.27267	0.159422	1.03352	2.56315	0.0103727	0.0365888	ENSG00000198754	OXCT2
ENSDARG00000074265	dzip1l	33.0221	2.64568	6.25789	0.159798	0.964828	2.74212	0.0061044	0.0236824	ENSG00000158163	DZIP1L	ENSG00000158163	DZIP1L
ENSDARG00000012829	asah2	479.825	2.64055	6.23568	0.160367	1.05172	2.51071	0.012049	0.0413061	ENSG00000204147	ASAH2B
ENSDARG00000074466	gdpd3a	14.7131	2.63776	6.22366	0.160677	1.18313	2.22948	0.0257817	0.0768922	ENSG00000102886	GDPD3	ENSG00000102886	GDPD3
ENSDARG00000045142	hbae5	25.2656	2.63677	6.21936	0.160788	0.702586	3.75295	0.000174769	0.0011959	ENSG00000130656	HBZ	ENSG00000130656	HBZ
ENSDARG00000002406	zmynd10	14.6294	2.63383	6.20671	0.161116	0.437472	6.02056	1.73812e-09	6.12274e-08	ENSG00000004838	ZMYND10	ENSG00000004838	ZMYND10
ENSDARG00000105187	gcshb	113.388	2.62765	6.18019	0.161807	0.942055	2.78927	0.00528264	0.0210341	ENSG00000140905	GCSH
ENSDARG00000034203	hist1h2ba	2.1092	2.62674	6.1763	0.161909	1.09383	2.40142	0.0163314	0.0528386	ENSG00000146047	HIST1H2BA	ENSG00000146047	HIST1H2BA
ENSDARG00000037860	cox6b2	342.371	2.62245	6.15793	0.162392	0.249162	10.525	6.62304e-26	2.28638e-22
ENSDARG00000089983	si:ch73-109i22.2	7.68045	2.60931	6.10211	0.163878	0.518912	5.02842	4.94534e-07	7.88552e-06	ENSG00000027869	SH2D2A	ENSG00000027869	SH2D2A
ENSDARG00000074848	smim7	32.4506	2.60545	6.08579	0.164317	0.36095	7.21831	5.2639e-13	5.64928e-11	ENSG00000268790	AC008764.4
ENSDARG00000003994	syt9a	4.99277	2.59885	6.05804	0.16507	1.21338	2.14183	0.0322075	0.0920156	ENSG00000170743	SYT9	ENSG00000170743	SYT9
ENSDARG00000070575	fam131bb	1.98958	2.59721	6.05115	0.165258	1.16516	2.22907	0.0258094	0.0769526	ENSG00000159784	FAM131B	ENSG00000159784	FAM131B
ENSDARG00000088612	si:ch211-153b23.7	4.97317	2.58944	6.01867	0.16615	0.956973	2.70587	0.00681255	0.0259408
ENSDARG00000040942	pnp6	27.426	2.58921	6.01769	0.166177	1.18916	2.17734	0.029455	0.0857004
ENSDARG00000053005	cd22	1.67329	2.58354	5.99411	0.166831	0.933221	2.76842	0.00563294	0.0221774	ENSG00000088827	SIGLEC1
ENSDARG00000013613	anxa13l	28.7175	2.58311	5.99229	0.166881	0.280215	9.21829	3.01871e-20	2.60527e-17	ENSG00000104537	ANXA13	ENSG00000104537	ANXA13
ENSDARG00000093612	si:dkey-92i17.2	33.5816	2.58105	5.98374	0.16712	0.57193	4.51288	6.39544e-06	7.14502e-05
ENSDARG00000014828	l3mbtl1a	16.4778	2.57389	5.95413	0.167951	1.17241	2.19539	0.0281356	0.0827098	ENSG00000185513	L3MBTL1	ENSG00000185513	L3MBTL1
ENSDARG00000088080	si:dkey-34o23.3	23.3046	2.55842	5.89061	0.169762	1.04412	2.45031	0.0142733	0.0473375
ENSDARG00000104501	HIST1H2BA (1 of many)	8.00199	2.55511	5.87713	0.170151	0.535378	4.77254	1.81916e-06	2.42629e-05	ENSG00000146047	HIST1H2BA	ENSG00000146047	HIST1H2BA
ENSDARG00000097415	lrrc53	2.08039	2.53822	5.80871	0.172155	1.07613	2.35865	0.0183413	0.0583076	ENSG00000162621	LRRC53	ENSG00000162621	LRRC53
ENSDARG00000097635	wu:fb18f06	39.1274	2.53744	5.8056	0.172248	0.616055	4.11886	3.80753e-05	0.00032887
ENSDARG00000090689	hbbe1.2	4.53211	2.53542	5.79747	0.172489	0.706228	3.59009	0.000330559	0.0020648	ENSG00000196565	HBG2
ENSDARG00000079125	sowahab	2.31944	2.53497	5.79563	0.172544	0.788005	3.21694	0.00129564	0.00652643	ENSG00000198944	SOWAHA	ENSG00000198944	SOWAHA
ENSDARG00000078423	zgc:194285	15.5247	2.53184	5.78307	0.172918	0.446456	5.67097	1.41992e-08	3.67635e-07
ENSDARG00000035391	ptcd2	13.7015	2.53082	5.779	0.17304	0.511098	4.95173	7.35553e-07	1.10575e-05	ENSG00000049883	PTCD2	ENSG00000049883	PTCD2
ENSDARG00000093018	si:ch211-122l24.6	18.4265	2.52477	5.7548	0.173768	1.12814	2.23799	0.0252219	0.0755161
ENSDARG00000100906	HIST2H2AB (1 of many)	2.59824	2.51671	5.72274	0.174742	0.54755	4.5963	4.30059e-06	5.04121e-05	ENSG00000184270	HIST2H2AB	ENSG00000184270	HIST2H2AB
ENSDARG00000091669	si:dkey-17e16.17	12.558	2.50573	5.67937	0.176076	0.968072	2.58837	0.00964306	0.0343781
ENSDARG00000105508	si:dkey-23a13.21	5.45863	2.50275	5.66765	0.17644	0.471174	5.31173	1.0859e-07	2.14212e-06
ENSDARG00000060566	cluhb	6.9853	2.50168	5.66346	0.176571	0.576595	4.33872	1.43316e-05	0.00014183	ENSG00000132361	CLUH	ENSG00000132361	CLUH
ENSDARG00000062849	kcnk10a	1.66832	2.50033	5.65815	0.176736	1.01846	2.45502	0.0140876	0.0468525	ENSG00000100433	KCNK10	ENSG00000100433	KCNK10
ENSDARG00000103015	HIST2H2AB (1 of many)	3.44623	2.49848	5.65089	0.176963	0.608485	4.10607	4.02456e-05	0.000344751	ENSG00000184270	HIST2H2AB	ENSG00000184270	HIST2H2AB
ENSDARG00000002391	tlcd1	6.72991	2.4928	5.62869	0.177661	0.988586	2.52158	0.0116829	0.0402843	ENSG00000160606	TLCD1	ENSG00000160606	TLCD1
ENSDARG00000100279	HIST2H2AB (1 of many)	1.87262	2.49219	5.6263	0.177737	0.691911	3.60189	0.000315912	0.00199193	ENSG00000184270	HIST2H2AB	ENSG00000184270	HIST2H2AB
ENSDARG00000098791	si:ch211-286k11.4	798.143	2.49012	5.61826	0.177991	0.837401	2.97364	0.00294294	0.0129256	ENSG00000099834	CDHR5	ENSG00000099834	CDHR5
ENSDARG00000099515	ephx4	1.60533	2.47766	5.56991	0.179536	1.00045	2.47653	0.0132665	0.0446447	ENSG00000172031	EPHX4	ENSG00000172031	EPHX4
ENSDARG00000038205	her2	3.86495	2.47433	5.55709	0.17995	0.913802	2.70773	0.00677447	0.0258273	ENSG00000197921	HES5	ENSG00000197921	HES5
ENSDARG00000042231	stx11b.2	2.27451	2.47197	5.54801	0.180245	0.679241	3.63931	0.000273367	0.00176284	ENSG00000135604	STX11	ENSG00000135604	STX11
ENSDARG00000096808	si:dkey-287g12.6	32.0039	2.46552	5.52325	0.181053	0.300744	8.19807	2.44281e-16	6.57115e-14
ENSDARG00000078970	il7r	9.51632	2.46259	5.51205	0.181421	0.390862	6.30041	2.9686e-10	1.36946e-08	ENSG00000168685	IL7R	ENSG00000168685	IL7R
ENSDARG00000079647	muc13b	686.027	2.45776	5.49362	0.182029	1.04688	2.34769	0.0188902	0.0596361
ENSDARG00000095789	ccr8.1	4.4596	2.4567	5.48959	0.182163	1.08746	2.25912	0.0238757	0.0722375	ENSG00000160791	CCR5
ENSDARG00000079983	agbl2	29.9728	2.45584	5.48631	0.182272	1.0928	2.24728	0.0246221	0.0739879	ENSG00000165923	AGBL2	ENSG00000165923	AGBL2
ENSDARG00000087386	pcp4b	17.9794	2.45311	5.47594	0.182617	0.97081	2.52687	0.0115085	0.0398088	ENSG00000183036	PCP4	ENSG00000183036	PCP4
ENSDARG00000075482	zgc:173587	10.0115	2.44924	5.46129	0.183107	0.378687	6.46771	9.94985e-11	5.10127e-09	ENSG00000146047	HIST1H2BA	ENSG00000146047	HIST1H2BA
ENSDARG00000042784	gdf7	1.86285	2.44547	5.44703	0.183586	1.0761	2.27252	0.0230551	0.0701132
ENSDARG00000070955	hmx3a	5.32883	2.44175	5.43299	0.184061	0.846456	2.88467	0.00391826	0.0163792	ENSG00000188620	HMX3	ENSG00000188620	HMX3
ENSDARG00000101963	tmem141	6.64035	2.43541	5.40917	0.184871	0.484305	5.02866	4.93908e-07	7.8816e-06	ENSG00000244187	TMEM141	ENSG00000244187	TMEM141
ENSDARG00000019692	colq	29.8076	2.43278	5.39934	0.185208	1.07417	2.26481	0.0235243	0.071341	ENSG00000206561	COLQ	ENSG00000206561	COLQ
ENSDARG00000068507	crybb1	9.54637	2.42999	5.3889	0.185567	1.12183	2.1661	0.0303032	0.0875778	ENSG00000100122	CRYBB1	ENSG00000100122	CRYBB1
ENSDARG00000032553	egln3	42.7523	2.42902	5.38529	0.185691	0.708378	3.42899	0.000605824	0.00344927	ENSG00000129521	EGLN3	ENSG00000129521	EGLN3
ENSDARG00000043982	tube1	4.13077	2.42792	5.38116	0.185834	0.693923	3.49883	0.000467308	0.00277107	ENSG00000074935	TUBE1	ENSG00000074935	TUBE1
ENSDARG00000094760	si:dkey-125i10.3	10.3105	2.4267	5.37662	0.185991	0.580117	4.18312	2.87538e-05	0.000259398
ENSDARG00000067806	zgc:158432	164.218	2.42629	5.37508	0.186044	0.553717	4.38181	1.17696e-05	0.000119678
ENSDARG00000105387	si:ch211-160o17.3	7.93404	2.4183	5.34543	0.187076	1.06376	2.27335	0.023005	0.0699914
ENSDARG00000098923	zgc:173577	8.13799	2.41676	5.3397	0.187276	0.575273	4.20106	2.65663e-05	0.00024273
ENSDARG00000051726	CU302436.1	1.6357	2.41649	5.33872	0.187311	1.09809	2.20063	0.0277622	0.0817745	ENSG00000146047	HIST1H2BA	ENSG00000146047	HIST1H2BA
ENSDARG00000069540	si:dkey-30c15.2	22.9224	2.41632	5.33808	0.187333	1.06593	2.26687	0.0233983	0.0710211
ENSDARG00000040230	si:dkey-37m8.11	7.94127	2.41547	5.33495	0.187443	0.490607	4.92344	8.50359e-07	1.25185e-05	ENSG00000104228	TRIM35	ENSG00000104228	TRIM35
ENSDARG00000032516	rrp36	68.0616	2.41057	5.31683	0.188082	0.317321	7.59662	3.03958e-14	4.31204e-12	ENSG00000124541	RRP36	ENSG00000124541	RRP36
ENSDARG00000069297	upf3a	5.45089	2.40431	5.29382	0.1889	1.12663	2.13407	0.032837	0.0932995	ENSG00000169062	UPF3A	ENSG00000169062	UPF3A
ENSDARG00000094133	wu:fc21g02	19.4184	2.40428	5.29372	0.188903	0.926186	2.5959	0.00943445	0.0337973
ENSDARG00000020574	atp2a1	1657.04	2.40371	5.29161	0.188978	0.543931	4.41914	9.90944e-06	0.000103598
ENSDARG00000022295	hnf1bb	48.7934	2.40166	5.2841	0.189247	0.54607	4.39808	1.09214e-05	0.000112209
ENSDARG00000013020	dtnbb	5.98929	2.39679	5.26632	0.189886	0.963282	2.48815	0.0128408	0.0434807	ENSG00000138101	DTNB	ENSG00000138101	DTNB
ENSDARG00000017773	slc16a12a	64.3946	2.39547	5.26148	0.190061	1.06326	2.25294	0.0242631	0.0731105	ENSG00000152779	SLC16A12	ENSG00000152779	SLC16A12
ENSDARG00000070403	wdyhv1	2.7874	2.38587	5.22658	0.19133	0.595404	4.00714	6.14586e-05	0.000493026	ENSG00000156795	WDYHV1	ENSG00000156795	WDYHV1
ENSDARG00000105459	CU457819.4	4.04904	2.38578	5.22628	0.191341	0.41692	5.7224	1.05027e-08	2.85747e-07
ENSDARG00000092074	hcst	1.34903	2.37828	5.19916	0.192339	0.818124	2.90699	0.00364926	0.0154134
ENSDARG00000042982	cyp2p8	108.939	2.37356	5.18217	0.192969	0.781436	3.03743	0.00238606	0.0108525	ENSG00000134716	CYP2J2	ENSG00000134716	CYP2J2
ENSDARG00000097372	si:ch211-139d20.3	2.47637	2.36993	5.16915	0.193455	0.671927	3.52706	0.000420205	0.00252647
ENSDARG00000045755	ccdc59	43.476	2.36953	5.16774	0.193508	0.386601	6.12914	8.83528e-10	3.46601e-08	ENSG00000133773	CCDC59	ENSG00000133773	CCDC59
ENSDARG00000079340		29.2323	2.36237	5.14214	0.194471	0.537851	4.39224	1.12191e-05	0.000114927	ENSG00000142494	SLC47A1
ENSDARG00000001760	tnxba	11.4103	2.36012	5.13415	0.194774	1.00466	2.34919	0.0188144	0.0594694	ENSG00000168477	TNXB	ENSG00000168477	TNXB
ENSDARG00000078211	espnla	2.03334	2.35809	5.12691	0.195049	1.0298	2.28985	0.0220301	0.0675913	ENSG00000144488	ESPNL	ENSG00000144488	ESPNL
ENSDARG00000076652	zgc:193807	5.87298	2.35667	5.12186	0.195242	0.851357	2.76813	0.00563788	0.022187
ENSDARG00000079377	arhgef38	5.06102	2.35088	5.10136	0.196026	0.746701	3.14836	0.00164191	0.00793857	ENSG00000236699	ARHGEF38	ENSG00000236699	ARHGEF38
ENSDARG00000074563	gpr37a	4.66248	2.34819	5.09184	0.196393	0.704802	3.3317	0.000863183	0.00462687	ENSG00000170775	GPR37	ENSG00000170775	GPR37
ENSDARG00000079815	lyrm7	11.4147	2.33915	5.06003	0.197627	0.438517	5.33422	9.59582e-08	1.92223e-06	ENSG00000186687	LYRM7	ENSG00000186687	LYRM7
ENSDARG00000101218	si:ch73-345f18.3	7.73386	2.33652	5.05084	0.197987	0.962251	2.42818	0.0151747	0.0496544
ENSDARG00000098187	kctd14	1.74584	2.33454	5.04391	0.198259	1.03099	2.26437	0.0235514	0.0714128	ENSG00000151364	KCTD14	ENSG00000151364	KCTD14
ENSDARG00000089511	si:ch73-78o10.1	47.3986	2.33415	5.04252	0.198313	0.680401	3.43055	0.000602367	0.00343372
ENSDARG00000002696	gnb3b	1.67729	2.32987	5.02759	0.198903	1.03887	2.24269	0.0249168	0.0747541	ENSG00000111664	GNB3	ENSG00000111664	GNB3
ENSDARG00000079272	tmem14cb	10.3084	2.32618	5.01477	0.199411	0.561488	4.14289	3.42953e-05	0.000301895	ENSG00000111843	TMEM14C
ENSDARG00000043934	il17a/f2	1.70178	2.31885	4.98934	0.200427	0.992168	2.33715	0.0194313	0.0609682
ENSDARG00000092360	si:ch211-51h9.6	30.657	2.31844	4.98792	0.200484	0.265596	8.72918	2.56531e-18	1.15511e-15	ENSG00000242259	C22orf39	ENSG00000242259	C22orf39
ENSDARG00000057632	ppp1r42	17.1568	2.3111	4.96262	0.201506	0.67045	3.44709	0.000566657	0.00326305	ENSG00000178125	PPP1R42	ENSG00000178125	PPP1R42
ENSDARG00000070485	apitd1	16.1302	2.30843	4.95342	0.201881	0.446384	5.17139	2.32357e-07	4.12763e-06	ENSG00000251503	CENPS-CORT
ENSDARG00000030270	tnnt3a	26.3956	2.30434	4.93943	0.202453	0.519513	4.43558	9.18231e-06	9.6889e-05	ENSG00000130595	TNNT3	ENSG00000130595	TNNT3
ENSDARG00000076241	txlnbb	266.936	2.30416	4.93881	0.202478	0.348385	6.61384	3.74465e-11	2.19725e-09	ENSG00000164440	TXLNB	ENSG00000164440	TXLNB
ENSDARG00000101455	si:ch211-284k5.2	11.1957	2.30139	4.92933	0.202867	0.697222	3.3008	0.000964091	0.00508122	ENSG00000231256	C17orf105	ENSG00000231256	C17orf105
ENSDARG00000055787	dzank1	18.6516	2.29805	4.91791	0.203338	1.08931	2.10963	0.0348901	0.0978842	ENSG00000089091	DZANK1	ENSG00000089091	DZANK1
ENSDARG00000071468	mrpl54	55.0054	2.29714	4.91482	0.203466	0.287108	8.00096	1.23454e-15	2.64813e-13	ENSG00000183617	MRPL54	ENSG00000183617	MRPL54
ENSDARG00000062355	axdnd1	65.7381	2.28626	4.8779	0.205006	0.763325	2.99513	0.00274325	0.0121907	ENSG00000162779	AXDND1	ENSG00000162779	AXDND1
ENSDARG00000053831	vtnb	215.971	2.28013	4.85722	0.205879	1.08383	2.10377	0.0353983	0.0989747	ENSG00000109072	VTN	ENSG00000109072	VTN
ENSDARG00000086751	FP236812.4	4.6709	2.27803	4.85017	0.206178	0.521559	4.36774	1.25539e-05	0.000126358	ENSG00000146047	HIST1H2BA	ENSG00000146047	HIST1H2BA
ENSDARG00000018061	neil1	59.7812	2.27683	4.84613	0.20635	0.366769	6.20781	5.37288e-10	2.24539e-08	ENSG00000140398	NEIL1	ENSG00000140398	NEIL1
ENSDARG00000029388	si:dkey-90m5.4	136.17	2.27345	4.83478	0.206835	0.804212	2.82693	0.00469966	0.0190721	ENSG00000171236	LRG1	ENSG00000171236	LRG1
ENSDARG00000011961	csrp2	12.527	2.26967	4.82213	0.207377	0.714208	3.17789	0.00148353	0.00728158	ENSG00000175183	CSRP2	ENSG00000175183	CSRP2
ENSDARG00000016754	tbca	96.3202	2.26584	4.80936	0.207928	0.257345	8.80469	1.31216e-18	6.47111e-16	ENSG00000171530	TBCA	ENSG00000171530	TBCA
ENSDARG00000089467	fam161b	6.93108	2.26477	4.80579	0.208082	0.544696	4.15787	3.2123e-05	0.00028565	ENSG00000156050	FAM161B	ENSG00000156050	FAM161B
ENSDARG00000069435	cfap58	77.5941	2.26374	4.80234	0.208232	0.900278	2.51449	0.0119205	0.0409334	ENSG00000120051	CFAP58	ENSG00000120051	CFAP58
ENSDARG00000088157	smoc2	8.89608	2.25938	4.78787	0.208861	0.568083	3.9772	6.97302e-05	0.000547506	ENSG00000112562	SMOC2	ENSG00000112562	SMOC2
ENSDARG00000074677	frem3	142.421	2.25928	4.78754	0.208876	0.549951	4.10815	3.98835e-05	0.000342215
ENSDARG00000097696	si:ch73-71c20.5	56.4569	2.25693	4.77974	0.209216	0.358287	6.29923	2.99118e-10	1.37529e-08
ENSDARG00000077721	knop1	77.4822	2.25387	4.76961	0.209661	0.335776	6.71243	1.91414e-11	1.2216e-09	ENSG00000103550	KNOP1	ENSG00000103550	KNOP1
ENSDARG00000077419	si:ch211-119e14.9	17.9224	2.24741	4.74831	0.210601	0.894784	2.51168	0.0120157	0.0412125	ENSG00000143217	NECTIN4	ENSG00000143217	NECTIN4
ENSDARG00000068969	zgc:153759	14.2405	2.243	4.73382	0.211246	0.786174	2.85306	0.00433002	0.017827	ENSG00000157873	TNFRSF14	ENSG00000157873	TNFRSF14
ENSDARG00000029859	si:ch211-241d21.5	4.60041	2.24235	4.73167	0.211342	0.664021	3.37693	0.000733006	0.00404658	ENSG00000198520	C1orf228	ENSG00000198520	C1orf228
ENSDARG00000036292	cdx4	17.3985	2.23746	4.71566	0.212059	0.676598	3.30693	0.000943256	0.00498155	ENSG00000131264	CDX4	ENSG00000131264	CDX4
ENSDARG00000054202	hbl4	36.3766	2.23209	4.69813	0.212851	0.877406	2.54396	0.0109603	0.0382834	ENSG00000185303	SFTPA2
ENSDARG00000093007	mphosph6	73.5813	2.22728	4.6825	0.213561	0.423544	5.25868	1.45093e-07	2.74404e-06	ENSG00000135698	MPHOSPH6	ENSG00000135698	MPHOSPH6
ENSDARG00000013752	tnni2a.3	2645.92	2.22661	4.68033	0.21366	0.612314	3.63639	0.000276486	0.00177797	ENSG00000130598	TNNI2	ENSG00000130598	TNNI2
ENSDARG00000088709	tnfaip8l3	43.3078	2.22467	4.67405	0.213947	0.514757	4.3218	1.54764e-05	0.00015128	ENSG00000183578	TNFAIP8L3	ENSG00000183578	TNFAIP8L3
ENSDARG00000092033	si:dkey-239h2.3	17.5347	2.22209	4.66569	0.214331	0.435272	5.10506	3.30693e-07	5.60987e-06
ENSDARG00000042577	batf3	13.7036	2.22168	4.66435	0.214392	0.398641	5.57313	2.50204e-08	6.06137e-07	ENSG00000123685	BATF3	ENSG00000123685	BATF3
ENSDARG00000091079		100.025	2.21817	4.65304	0.214913	0.247592	8.95899	3.27676e-19	1.93919e-16	ENSG00000156928	MALSU1	ENSG00000156928	MALSU1
ENSDARG00000105414	zgc:112234	2.8839	2.21508	4.64308	0.215374	0.519285	4.26564	1.99329e-05	0.00018913	ENSG00000146047	HIST1H2BA	ENSG00000146047	HIST1H2BA
ENSDARG00000035080	hsf2bp	15.8336	2.21383	4.63906	0.215561	0.344377	6.42852	1.2885e-10	6.46216e-09	ENSG00000160207	HSF2BP	ENSG00000160207	HSF2BP
ENSDARG00000044402	nop16	62.0678	2.21278	4.63567	0.215719	0.341861	6.47275	9.62363e-11	4.97093e-09	ENSG00000048162	NOP16	ENSG00000048162	NOP16
ENSDARG00000059838	myom3	25.7404	2.2116	4.63189	0.215894	0.723569	3.05652	0.00223924	0.0102567	ENSG00000142661	MYOM3	ENSG00000142661	MYOM3
ENSDARG00000058379	otpb	3.02614	2.21085	4.62947	0.216008	0.838683	2.63609	0.00838671	0.0307241	ENSG00000171540	OTP	ENSG00000171540	OTP
ENSDARG00000091667	si:dkey-234i14.3	13.798	2.21045	4.62819	0.216067	1.04266	2.12	0.0340061	0.0959642
ENSDARG00000053240	kif6	16.5333	2.20846	4.6218	0.216366	1.03778	2.12806	0.0333324	0.0944349	ENSG00000164627	KIF6	ENSG00000164627	KIF6
ENSDARG00000021633	sh3bgr	240.624	2.20377	4.60683	0.217069	0.485316	4.54091	5.60128e-06	6.3364e-05	ENSG00000185437	SH3BGR	ENSG00000185437	SH3BGR
ENSDARG00000093572	lamc3	49.7324	2.19674	4.58444	0.218129	0.567095	3.87368	0.000107203	0.000790213	ENSG00000050555	LAMC3	ENSG00000050555	LAMC3
ENSDARG00000058370	ropn1l	51.6599	2.19544	4.5803	0.218326	0.689167	3.18565	0.0014443	0.00712452	ENSG00000145491	ROPN1L	ENSG00000145491	ROPN1L
ENSDARG00000034988	asb4	3.94891	2.19125	4.56701	0.218962	0.921511	2.37789	0.0174122	0.0558035	ENSG00000005981	ASB4	ENSG00000005981	ASB4
ENSDARG00000067997	myhz1.3	4718.38	2.19116	4.56671	0.218976	0.586091	3.73859	0.000185055	0.00125798	ENSG00000264424	MYH4
ENSDARG00000052097	trim35-31	2.55118	2.18848	4.55825	0.219382	0.546409	4.00521	6.19637e-05	0.000496308	ENSG00000104228	TRIM35	ENSG00000104228	TRIM35
ENSDARG00000054649	rac1l	5.08297	2.18589	4.55008	0.219776	0.709438	3.08116	0.00206196	0.00960409
ENSDARG00000032865	pacsin1a	7.82624	2.18391	4.54382	0.220079	0.898091	2.43172	0.0150273	0.0492579	ENSG00000124507	PACSIN1	ENSG00000124507	PACSIN1
ENSDARG00000059773		7.1832	2.18063	4.53352	0.220579	0.527402	4.13467	3.5547e-05	0.000310931	ENSG00000277363	SRCIN1	ENSG00000277363	SRCIN1
ENSDARG00000059175	cep19	6.1631	2.17777	4.52453	0.221018	0.955517	2.27915	0.0226581	0.0691088	ENSG00000174007	CEP19	ENSG00000174007	CEP19
ENSDARG00000054980	ebna1bp2	172.416	2.17488	4.51549	0.22146	0.334369	6.50443	7.79877e-11	4.12082e-09	ENSG00000117395	EBNA1BP2	ENSG00000117395	EBNA1BP2
ENSDARG00000057912	eif1axb	389.884	2.17328	4.51046	0.221707	0.253232	8.58215	9.31167e-18	3.70909e-15	ENSG00000198692	EIF1AY
ENSDARG00000006773	elovl4a	8.97251	2.16919	4.49772	0.222335	0.664235	3.2657	0.00109193	0.00564609	ENSG00000118402	ELOVL4	ENSG00000118402	ELOVL4
ENSDARG00000045691	zcrb1	27.8945	2.16817	4.49451	0.222493	0.375276	5.77752	7.58114e-09	2.13644e-07	ENSG00000139168	ZCRB1	ENSG00000139168	ZCRB1
ENSDARG00000079727	sepp1b	105.626	2.16709	4.49116	0.22266	0.55327	3.91687	8.97052e-05	0.000678125
ENSDARG00000097456	coa3b	23.0573	2.1658	4.48715	0.222859	0.531312	4.07632	4.57538e-05	0.000384931	ENSG00000183978	COA3	ENSG00000183978	COA3
ENSDARG00000039547	CR354435.1	1.47313	2.16559	4.48649	0.222892	0.906225	2.38968	0.0168631	0.0542875	ENSG00000146047	HIST1H2BA	ENSG00000146047	HIST1H2BA
ENSDARG00000029596	trim55a	31.3903	2.15604	4.45689	0.224371	0.487558	4.42212	9.77379e-06	0.0001024
ENSDARG00000092718	gbgt1l2	4.95335	2.15513	4.45408	0.224513	0.546766	3.94159	8.09417e-05	0.000621655	ENSG00000148288	GBGT1	ENSG00000148288	GBGT1
ENSDARG00000059263	hoxd12a	2.05167	2.15453	4.45222	0.224607	0.729924	2.95171	0.00316015	0.0136794	ENSG00000170178	HOXD12	ENSG00000170178	HOXD12
ENSDARG00000102255	CABZ01102076.1	3.31983	2.14996	4.43815	0.225319	0.695077	3.09312	0.00198062	0.00928159
ENSDARG00000016280	eif1ad	61.8554	2.14806	4.4323	0.225616	0.339648	6.32437	2.54267e-10	1.18886e-08	ENSG00000175376	EIF1AD	ENSG00000175376	EIF1AD
ENSDARG00000069361	nrgnb	11.9638	2.14676	4.42832	0.225819	0.508368	4.22284	2.41241e-05	0.000223072	ENSG00000064199	SPA17	ENSG00000064199	SPA17
ENSDARG00000070847	trim35-20	9.47255	2.14043	4.40894	0.226812	0.727973	2.94026	0.00327934	0.0140894	ENSG00000104228	TRIM35	ENSG00000104228	TRIM35
ENSDARG00000074323	efcab2	10.0027	2.13654	4.39706	0.227425	0.593774	3.59824	0.000320379	0.00201748	ENSG00000203666	EFCAB2	ENSG00000203666	EFCAB2
ENSDARG00000004627	panx3	28.1328	2.13639	4.39661	0.227448	0.99552	2.14601	0.0318725	0.0911592	ENSG00000154143	PANX3	ENSG00000154143	PANX3
ENSDARG00000095047	si:dkey-85k15.4	38.1604	2.13556	4.39408	0.227579	0.902466	2.36636	0.0179639	0.0573057
ENSDARG00000104037	si:dkey-74k8.4	55.4009	2.13236	4.38435	0.228084	0.534444	3.98987	6.61084e-05	0.000522236
ENSDARG00000059274	hoxd9a	10.3613	2.13171	4.38237	0.228187	0.588269	3.6237	0.000290416	0.00185146	ENSG00000128709	HOXD9	ENSG00000128709	HOXD9
ENSDARG00000093089	tac3a	8.53163	2.1317	4.38234	0.228189	0.603863	3.53011	0.000415391	0.00250182
ENSDARG00000069630	tat	286.916	2.13166	4.38222	0.228195	0.782845	2.72297	0.00646983	0.0248658	ENSG00000198650	TAT	ENSG00000198650	TAT
ENSDARG00000021948	tnc	322.26	2.13096	4.38009	0.228306	0.953569	2.23472	0.0254356	0.0760572	ENSG00000041982	TNC	ENSG00000041982	TNC
ENSDARG00000000804	rassf6	11.7017	2.13083	4.3797	0.228326	0.785714	2.71197	0.00668846	0.0255558	ENSG00000169435	RASSF6	ENSG00000169435	RASSF6
ENSDARG00000058243	phactr3a	1.7488	2.12932	4.37511	0.228566	0.990445	2.14986	0.0315662	0.090461	ENSG00000087495	PHACTR3	ENSG00000087495	PHACTR3
ENSDARG00000031248	enkur	91.9552	2.12905	4.37428	0.228609	0.472285	4.50797	6.54509e-06	7.3004e-05	ENSG00000151023	ENKUR	ENSG00000151023	ENKUR
ENSDARG00000033760	pmelb	4.38811	2.12873	4.37332	0.228659	0.820695	2.59381	0.00949185	0.0339683	ENSG00000185664	PMEL	ENSG00000185664	PMEL
ENSDARG00000026338	styxl1	16.0719	2.12688	4.36772	0.228952	0.540761	3.93313	8.38475e-05	0.000641334	ENSG00000127952	STYXL1	ENSG00000127952	STYXL1
ENSDARG00000004948	bccip	248.821	2.12598	4.36498	0.229096	0.228803	9.29174	1.51793e-20	1.49718e-17	ENSG00000107949	BCCIP	ENSG00000107949	BCCIP
ENSDARG00000104554	FP236812.8	2.61676	2.12271	4.35512	0.229615	0.733185	2.89519	0.00378924	0.0159299	ENSG00000146047	HIST1H2BA	ENSG00000146047	HIST1H2BA
ENSDARG00000009161	ftr55	5.26241	2.12194	4.35279	0.229738	0.957873	2.21526	0.0267419	0.079322	ENSG00000132481	TRIM47	ENSG00000132481	TRIM47
ENSDARG00000100828	CU929150.2	1.4547	2.10281	4.29546	0.232804	0.770845	2.72793	0.00637323	0.0245415
ENSDARG00000092743	CU302436.4	2.14483	2.0956	4.27405	0.23397	0.691287	3.03145	0.00243381	0.0110237	ENSG00000146047	HIST1H2BA	ENSG00000146047	HIST1H2BA
ENSDARG00000102946	si:ch73-167f10.1	23.8278	2.09515	4.27271	0.234043	0.961858	2.17823	0.0293886	0.0855313
ENSDARG00000090886	zmp:0000001301	4.2759	2.09494	4.27209	0.234078	0.707967	2.95909	0.00308545	0.0134319
ENSDARG00000001818	c3b.2	541.266	2.09314	4.26676	0.23437	0.477296	4.38541	1.15768e-05	0.000118167
ENSDARG00000075043	si:dkeyp-123h10.2	7.13307	2.0927	4.26547	0.234441	0.711133	2.94278	0.00325284	0.0139988	ENSG00000185477	GPRIN3	ENSG00000185477	GPRIN3
ENSDARG00000009471	nid2b	16.5044	2.0917	4.2625	0.234604	0.729664	2.86666	0.00414829	0.0171985	ENSG00000087303	NID2	ENSG00000087303	NID2
ENSDARG00000044433	sned1	16.0593	2.08726	4.24939	0.235328	0.49851	4.18699	2.82682e-05	0.00025549	ENSG00000162804	SNED1	ENSG00000162804	SNED1
ENSDARG00000012460	rassf4	25.7108	2.08367	4.23883	0.235914	0.41061	5.07456	3.88389e-07	6.41012e-06	ENSG00000107551	RASSF4	ENSG00000107551	RASSF4
ENSDARG00000094473	si:dkey-163f12.6	14.4801	2.07995	4.22792	0.236523	0.929578	2.23752	0.0252524	0.0755652	ENSG00000142621	FHAD1	ENSG00000142621	FHAD1
ENSDARG00000068711	crfb4	29.2761	2.07635	4.21739	0.237114	0.317546	6.53874	6.20389e-11	3.3995e-09	ENSG00000249624	AP000295.1
ENSDARG00000096319	si:ch211-239j9.1	15.7922	2.07514	4.21384	0.237313	0.805889	2.57497	0.010025	0.0354772
ENSDARG00000076090	jakmip1	9.01492	2.0718	4.20412	0.237862	0.750405	2.76091	0.005764	0.022569	ENSG00000152969	JAKMIP1	ENSG00000152969	JAKMIP1
ENSDARG00000030263	mfsd2b	5.06729	2.07004	4.19899	0.238153	0.838688	2.46819	0.0135798	0.0454409	ENSG00000205639	MFSD2B	ENSG00000205639	MFSD2B
ENSDARG00000002217	scocb	35.7645	2.0698	4.19828	0.238193	0.280225	7.3862	1.51084e-13	1.84083e-11	ENSG00000153130	SCOC	ENSG00000153130	SCOC
ENSDARG00000097630	si:ch211-282b22.1	59.356	2.06805	4.19319	0.238482	0.344755	5.9986	1.99027e-09	6.87073e-08	ENSG00000176731	C8orf59	ENSG00000176731	C8orf59
ENSDARG00000089331	urahb	14.469	2.06108	4.17298	0.239637	0.897295	2.29699	0.0216194	0.066558
ENSDARG00000054186	ncs1b	1.8003	2.05993	4.16965	0.239828	0.922797	2.23226	0.0255976	0.0764421	ENSG00000107130	NCS1	ENSG00000107130	NCS1
ENSDARG00000054515	CR925773.1	6.31371	2.05931	4.16786	0.239931	0.545758	3.7733	0.000161104	0.0011179
ENSDARG00000033754	rbm48	79.2747	2.05882	4.16646	0.240012	0.40917	5.0317	4.86159e-07	7.77591e-06	ENSG00000127993	RBM48	ENSG00000127993	RBM48
ENSDARG00000095457	si:ch211-147d7.5	4.76998	2.05831	4.16499	0.240097	0.643617	3.19804	0.00138366	0.00689269
ENSDARG00000101693		4.08972	2.05742	4.16242	0.240245	0.463002	4.44366	8.84415e-06	9.38949e-05	ENSG00000204344	STK19	ENSG00000204344	STK19
ENSDARG00000062687	kcnh7	3.38345	2.05615	4.15874	0.240457	0.785107	2.61894	0.00882034	0.0319845	ENSG00000184611	KCNH7	ENSG00000184611	KCNH7
ENSDARG00000105052	cfhl5	77.4721	2.04979	4.14046	0.241519	0.918146	2.23254	0.0255796	0.0764105	ENSG00000134365	CFHR4
ENSDARG00000041085	arpin	24.0072	2.04851	4.13677	0.241734	0.326001	6.28374	3.30521e-10	1.48505e-08	ENSG00000242498	ARPIN
ENSDARG00000059908	si:ch211-217k17.7	179.299	2.0478	4.13475	0.241853	0.290732	7.04361	1.87324e-12	1.70927e-10	ENSG00000110104	CCDC86	ENSG00000110104	CCDC86
ENSDARG00000104710	psip1a	22.4164	2.04777	4.13465	0.241858	0.372649	5.49516	3.90356e-08	8.78853e-07	ENSG00000164985	PSIP1	ENSG00000164985	PSIP1
ENSDARG00000105176	FO704618.1	6.21469	2.04734	4.13342	0.24193	0.497664	4.11389	3.89039e-05	0.000334781
ENSDARG00000099009	si:dkey-50i6.6	14.7043	2.04477	4.12607	0.242361	0.415008	4.92706	8.34749e-07	1.23062e-05	ENSG00000176472	ZNF575	ENSG00000176472	ZNF575
ENSDARG00000092677	coa6	41.9516	2.04422	4.12451	0.242453	0.284646	7.18164	6.88807e-13	7.21236e-11	ENSG00000168275	COA6	ENSG00000168275	COA6
ENSDARG00000075626	zgc:172090	56.0131	2.04315	4.12145	0.242633	0.911524	2.24147	0.0249957	0.0749582
ENSDARG00000054540	imp4	68.6329	2.0431	4.12129	0.242642	0.412604	4.95171	7.35639e-07	1.10575e-05	ENSG00000136718	IMP4	ENSG00000136718	IMP4
ENSDARG00000058390	acot9.2	6.36668	2.04263	4.11995	0.242721	0.889825	2.29554	0.0217023	0.0667537	ENSG00000123130	ACOT9	ENSG00000123130	ACOT9
ENSDARG00000043728	srek1ip1	28.8532	2.04207	4.11836	0.242815	0.367769	5.55259	2.81476e-08	6.66917e-07	ENSG00000153006	SREK1IP1	ENSG00000153006	SREK1IP1
ENSDARG00000087854	zgc:112234	2.54035	2.04158	4.11695	0.242898	0.66662	3.06258	0.00219438	0.0100938	ENSG00000146047	HIST1H2BA	ENSG00000146047	HIST1H2BA
ENSDARG00000036189	spata4	39.7618	2.0415	4.11673	0.242911	0.465328	4.38722	1.14808e-05	0.000117317	ENSG00000150628	SPATA4	ENSG00000150628	SPATA4
ENSDARG00000105484	FP325123.5	3.52422	2.0401	4.11275	0.243146	0.763785	2.67105	0.00756152	0.028265
ENSDARG00000079150	si:ch211-276i12.9	81.6999	2.03531	4.0991	0.243956	0.309305	6.58025	4.69661e-11	2.67991e-09
ENSDARG00000054534	ACOT12	46.3945	2.03329	4.09336	0.244298	0.648176	3.13693	0.00170725	0.0081971	ENSG00000172497	ACOT12	ENSG00000172497	ACOT12
ENSDARG00000100887	si:dkey-11f4.20	16.3331	2.03321	4.09315	0.244311	0.708717	2.86886	0.00411955	0.017093
ENSDARG00000020822	ift22	12.8812	2.03081	4.08635	0.244717	0.433322	4.68662	2.77757e-06	3.47415e-05	ENSG00000128581	IFT22	ENSG00000128581	IFT22
ENSDARG00000014196	myl1	3413.16	2.03011	4.08435	0.244837	0.597518	3.39757	0.000679882	0.00380007	ENSG00000168530	MYL1	ENSG00000168530	MYL1
ENSDARG00000068814	spata2l	28.656	2.02451	4.06853	0.245789	0.40108	5.04765	4.4728e-07	7.22661e-06	ENSG00000158792	SPATA2L	ENSG00000158792	SPATA2L
ENSDARG00000101422	hdac12	7.56493	2.02435	4.06809	0.245816	0.561661	3.60422	0.000313087	0.00197893
ENSDARG00000079124		17.97	2.02333	4.0652	0.24599	0.454149	4.4552	8.38135e-06	8.97637e-05	ENSG00000122085	MTERF4	ENSG00000122085	MTERF4
ENSDARG00000035427	surf6	106.908	2.02063	4.0576	0.246451	0.386612	5.22649	1.7276e-07	3.18644e-06	ENSG00000148296	SURF6	ENSG00000148296	SURF6
ENSDARG00000077456	si:ch211-113a14.12	6.51146	2.01871	4.05221	0.246779	0.528504	3.81967	0.000133631	0.000953845	ENSG00000124575	HIST1H1D
ENSDARG00000069373	crcp	27.8788	2.01794	4.05005	0.246911	0.347671	5.80416	6.46883e-09	1.8558e-07	ENSG00000241258	CRCP	ENSG00000241258	CRCP
ENSDARG00000079255	zgc:174935	74.5696	2.01547	4.04312	0.247334	0.336984	5.9809	2.21905e-09	7.51032e-08
ENSDARG00000090268	krtt1c19e	360.402	2.01122	4.03122	0.248064	0.956538	2.1026	0.0355009	0.0992214	ENSG00000186393	KRT26
ENSDARG00000061509	tbx3b	2.9824	2.00536	4.0149	0.249072	0.893729	2.24382	0.0248442	0.0745787
ENSDARG00000021112	c1d	64.617	2.0022	4.00611	0.249619	0.373384	5.36231	8.21652e-08	1.67015e-06	ENSG00000197223	C1D	ENSG00000197223	C1D
ENSDARG00000024433	pvalb4	2541.84	2.00174	4.00482	0.249699	0.628862	3.18311	0.00145701	0.00717696
ENSDARG00000043663	faub	152.367	2.00145	4.00401	0.24975	0.254922	7.85122	4.12026e-15	7.48621e-13	ENSG00000149806	FAU	ENSG00000149806	FAU
ENSDARG00000086998		48.2681	2.00089	4.00246	0.249846	0.75086	2.66479	0.00770358	0.0286986	ENSG00000241644	INMT
ENSDARG00000061977	ppfibp2a	20.9208	1.99819	3.995	0.250313	0.821503	2.43236	0.0150006	0.0492093	ENSG00000166387	PPFIBP2	ENSG00000166387	PPFIBP2
ENSDARG00000039697	shtn1	30.3609	1.99777	3.99383	0.250387	0.318834	6.26586	3.70762e-10	1.62703e-08	ENSG00000187164	SHTN1	ENSG00000187164	SHTN1
ENSDARG00000058940	si:ch211-248e11.2	45.2077	1.99555	3.98767	0.250773	0.462754	4.31233	1.61544e-05	0.000157239	ENSG00000160345	C9orf116	ENSG00000160345	C9orf116
ENSDARG00000035810	rgcc	102.107	1.99321	3.98121	0.25118	0.373661	5.33427	9.59298e-08	1.92223e-06	ENSG00000102760	RGCC	ENSG00000102760	RGCC
ENSDARG00000067567	SLC6A13	80.0075	1.98388	3.95556	0.252808	0.805161	2.46396	0.0137412	0.0458624	ENSG00000010379	SLC6A13	ENSG00000010379	SLC6A13
ENSDARG00000088017	si:ch73-40i7.2	15.0545	1.97661	3.93567	0.254086	0.476279	4.15011	3.32315e-05	0.000293654	ENSG00000133246	PRAM1	ENSG00000133246	PRAM1
ENSDARG00000091728	zgc:114046	8.03645	1.97154	3.92186	0.254981	0.549033	3.59093	0.000329503	0.00205944	ENSG00000146047	HIST1H2BA	ENSG00000146047	HIST1H2BA
ENSDARG00000045254	zmp:0000000624	74.131	1.97097	3.92031	0.255082	0.404614	4.87123	1.10905e-06	1.58426e-05	ENSG00000146540	C7orf50	ENSG00000146540	C7orf50
ENSDARG00000036190	txnl4a	72.174	1.97044	3.91889	0.255174	0.336109	5.86251	4.55909e-09	1.39177e-07	ENSG00000141759	TXNL4A	ENSG00000141759	TXNL4A
ENSDARG00000093237	si:ch211-89o9.4	8.50817	1.96851	3.91363	0.255517	0.541721	3.63381	0.00027927	0.00179143
ENSDARG00000086631	rnh1	12.7643	1.96534	3.90505	0.256079	0.429703	4.57371	4.79152e-06	5.55071e-05
ENSDARG00000039517	c8b	221.525	1.96461	3.90307	0.256209	0.840051	2.33868	0.0193521	0.0607792	ENSG00000021852	C8B	ENSG00000021852	C8B
ENSDARG00000059945	sv2a	20.4118	1.96291	3.89848	0.25651	0.889424	2.20695	0.0273177	0.0807292	ENSG00000159164	SV2A	ENSG00000159164	SV2A
ENSDARG00000100774	cmc4	2.50139	1.96236	3.89698	0.256609	0.737177	2.66199	0.00776806	0.0289024	ENSG00000182712	CMC4	ENSG00000182712	CMC4
ENSDARG00000005320	nipsnap1	67.3904	1.96235	3.89695	0.256611	0.260887	7.52182	5.40196e-14	7.26563e-12	ENSG00000184117	NIPSNAP1	ENSG00000184117	NIPSNAP1
ENSDARG00000039066	klhl31	1228.08	1.96163	3.89501	0.256739	0.611624	3.20724	0.00134016	0.00670529	ENSG00000124743	KLHL31	ENSG00000124743	KLHL31
ENSDARG00000095796	si:dkey-87o1.2	41.4062	1.96014	3.89098	0.257004	0.319302	6.13881	8.31417e-10	3.28648e-08
ENSDARG00000038577	cox6c	287.706	1.9592	3.88845	0.257172	0.280889	6.97499	3.05887e-12	2.60734e-10	ENSG00000164919	COX6C	ENSG00000164919	COX6C
ENSDARG00000077047	ptprnb	11.9213	1.95854	3.8867	0.257288	0.720878	2.71689	0.00658989	0.0252397	ENSG00000054356	PTPRN	ENSG00000054356	PTPRN
ENSDARG00000096515	si:dkey-58j15.10	38.0175	1.95421	3.87503	0.258062	0.489622	3.99126	6.5723e-05	0.000520383
ENSDARG00000020890	tmod4	608.823	1.95185	3.86871	0.258484	0.812019	2.4037	0.0162299	0.0525347	ENSG00000163157	TMOD4	ENSG00000163157	TMOD4
ENSDARG00000053685	gtf2a2	71.5777	1.94805	3.85852	0.259167	0.373592	5.21437	1.84442e-07	3.37785e-06	ENSG00000140307	GTF2A2	ENSG00000140307	GTF2A2
ENSDARG00000094154	hist2h3c	6.8023	1.94764	3.85744	0.259239	0.406122	4.79571	1.62096e-06	2.20598e-05
ENSDARG00000004169	stmn1a	275.384	1.94633	3.85392	0.259476	0.469444	4.14602	3.38299e-05	0.000298179	ENSG00000117632	STMN1	ENSG00000117632	STMN1
ENSDARG00000069287	imp3	59.429	1.94506	3.85053	0.259705	0.266849	7.28899	3.12293e-13	3.4965e-11	ENSG00000177971	IMP3	ENSG00000177971	IMP3
ENSDARG00000039136	cox16	21.6754	1.94347	3.8463	0.25999	0.320743	6.05927	1.36739e-09	5.01843e-08	ENSG00000133983	COX16	ENSG00000133983	COX16
ENSDARG00000101720	CU459186.4	4.32933	1.94239	3.84343	0.260185	0.829746	2.34095	0.0192348	0.0604569	ENSG00000203811	HIST2H3C	ENSG00000203811	HIST2H3C
ENSDARG00000001881	cacnb3a	1.6422	1.94143	3.84087	0.260358	0.876887	2.21401	0.0268284	0.0795277	ENSG00000167535	CACNB3	ENSG00000167535	CACNB3
ENSDARG00000069192	zgc:163030	26.967	1.93644	3.82761	0.26126	0.63471	3.05091	0.00228149	0.0104227	ENSG00000175315	CST6	ENSG00000175315	CST6
ENSDARG00000097639	si:ch73-265h17.4	6.82105	1.93518	3.82427	0.261488	0.736436	2.62777	0.00859463	0.0313196
ENSDARG00000059347	calml4b	10.2753	1.93456	3.82261	0.261601	0.430584	4.49287	7.02682e-06	7.75008e-05
ENSDARG00000005464	dnase1l1	17.7631	1.93424	3.82176	0.26166	0.761216	2.54098	0.0110542	0.0385722	ENSG00000163687	DNASE1L3
ENSDARG00000093131	si:ch211-57f7.7	6.20042	1.93344	3.81966	0.261803	0.819979	2.35792	0.0183777	0.058374
ENSDARG00000009178	zfand1	27.9201	1.93338	3.81948	0.261816	0.288137	6.70993	1.94723e-11	1.22966e-09	ENSG00000104231	ZFAND1	ENSG00000104231	ZFAND1
ENSDARG00000059725	hypk	120.476	1.93246	3.81706	0.261982	0.250971	7.69995	1.36125e-14	2.11996e-12	ENSG00000242028	HYPK	ENSG00000242028	HYPK
ENSDARG00000056643	slc22a7b.1	20.1233	1.93227	3.81655	0.262017	0.898793	2.14985	0.0315672	0.090461
ENSDARG00000039824		28.2031	1.93183	3.81539	0.262096	0.651524	2.9651	0.00302589	0.0132087	ENSG00000179071	CCDC89	ENSG00000179071	CCDC89
ENSDARG00000008170	dbnla	14.9575	1.92984	3.81013	0.262458	0.906179	2.12965	0.0332007	0.0941907	ENSG00000136279	DBNL	ENSG00000136279	DBNL
ENSDARG00000068755	exosc8	59.9805	1.92893	3.80773	0.262623	0.35238	5.47401	4.39973e-08	9.78858e-07	ENSG00000120699	EXOSC8	ENSG00000120699	EXOSC8
ENSDARG00000105558	btr07	48.9859	1.92231	3.7903	0.263831	0.399615	4.81042	1.50616e-06	2.08398e-05	ENSG00000223638	RFPL4A
ENSDARG00000012555	ak5	8.15127	1.9223	3.79027	0.263833	0.813785	2.36217	0.0181681	0.0578839	ENSG00000154027	AK5	ENSG00000154027	AK5
ENSDARG00000105393	zgc:112234	3.13575	1.92199	3.78944	0.263891	0.677332	2.83759	0.00454562	0.018567	ENSG00000146047	HIST1H2BA	ENSG00000146047	HIST1H2BA
ENSDARG00000074791	aldh3a1	9.85421	1.92162	3.78849	0.263957	0.694569	2.76664	0.00566366	0.0222627	ENSG00000108602	ALDH3A1
ENSDARG00000006602	chrna2a	4.7389	1.91952	3.78298	0.264342	0.601321	3.19218	0.00141203	0.00699365	ENSG00000120903	CHRNA2	ENSG00000120903	CHRNA2
ENSDARG00000058794	si:dkey-19a16.2	16.5451	1.91807	3.77918	0.264607	0.431582	4.44429	8.81839e-06	9.36694e-05
ENSDARG00000077357	lrrc61	13.1412	1.91683	3.77592	0.264836	0.540419	3.54693	0.000389744	0.00236391	ENSG00000127399	LRRC61	ENSG00000127399	LRRC61
ENSDARG00000101697		59.2437	1.91489	3.77085	0.265192	0.648468	2.95295	0.00314758	0.0136364	ENSG00000146530	VWDE	ENSG00000146530	VWDE
ENSDARG00000090946	si:zfos-364h11.1	40.5573	1.91486	3.77077	0.265198	0.551304	3.47333	0.000514051	0.00300353
ENSDARG00000057004	si:ch211-287a12.9	4.77019	1.90738	3.75126	0.266577	0.604462	3.15549	0.00160228	0.00778329
ENSDARG00000093058	si:dkey-13i19.8	134.876	1.90587	3.74735	0.266855	0.268108	7.1086	1.17227e-12	1.14534e-10	ENSG00000243317	STMP1	ENSG00000243317	STMP1
ENSDARG00000098989	CU459012.1	6.52738	1.90562	3.74671	0.266901	0.829936	2.29611	0.0216695	0.066673	ENSG00000100078	PLA2G3	ENSG00000100078	PLA2G3
ENSDARG00000058218	fam151a	49.5867	1.90348	3.74114	0.267298	0.739926	2.57252	0.010096	0.0357039	ENSG00000162391	FAM151A	ENSG00000162391	FAM151A
ENSDARG00000069230	IQCA1L	77.1666	1.90322	3.74047	0.267346	0.44459	4.28084	1.86187e-05	0.000177719	ENSG00000278685	IQCA1L	ENSG00000278685	IQCA1L
ENSDARG00000033175	snrpe	75.7518	1.9024	3.73834	0.267498	0.290097	6.5578	5.46063e-11	3.00016e-09	ENSG00000182004	SNRPE	ENSG00000182004	SNRPE
ENSDARG00000000161	itsn2a	20.2617	1.90103	3.73479	0.267752	0.373583	5.08864	3.60647e-07	6.03887e-06	ENSG00000198399	ITSN2	ENSG00000198399	ITSN2
ENSDARG00000042780	apoba	2304.92	1.90089	3.73444	0.267778	0.610653	3.11288	0.0018527	0.00878951	ENSG00000084674	APOB	ENSG00000084674	APOB
ENSDARG00000006577	nadka	10.492	1.89719	3.72486	0.268466	0.352776	5.37789	7.53657e-08	1.54808e-06	ENSG00000008130	NADK	ENSG00000008130	NADK
ENSDARG00000053448	si:ch211-251f6.6	2.8668	1.89695	3.72426	0.26851	0.756069	2.50897	0.0121084	0.041456
ENSDARG00000005738	rpf1	116.141	1.89532	3.72005	0.268813	0.308174	6.15017	7.74014e-10	3.07719e-08	ENSG00000117133	RPF1	ENSG00000117133	RPF1
ENSDARG00000001354	slc6a22.2	32.8825	1.89406	3.7168	0.269048	0.749151	2.52828	0.0114623	0.0396757
ENSDARG00000103722	FP236812.6	6.49226	1.89313	3.7144	0.269223	0.377083	5.02045	5.1551e-07	8.14475e-06	ENSG00000146047	HIST1H2BA	ENSG00000146047	HIST1H2BA
ENSDARG00000099715	si:dkey-152b24.7	12.2478	1.89292	3.71387	0.269261	0.430223	4.39987	1.08318e-05	0.0001114
ENSDARG00000056007	cyb5d1	33.855	1.89286	3.7137	0.269273	0.45785	4.13423	3.56154e-05	0.000311266	ENSG00000182224	CYB5D1	ENSG00000182224	CYB5D1
ENSDARG00000058306	prpf18	70.6823	1.89186	3.71114	0.269459	0.285494	6.62662	3.43466e-11	2.0502e-09	ENSG00000282246	AL157392.5
ENSDARG00000053488	si:ch73-22a13.3	1.8102	1.89163	3.71055	0.269501	0.64677	2.92474	0.00344743	0.0146891
ENSDARG00000071652	rrp8	67.1629	1.89103	3.709	0.269614	0.34196	5.52998	3.20273e-08	7.33828e-07	ENSG00000132275	RRP8	ENSG00000132275	RRP8
ENSDARG00000033447	nxph1	12.8694	1.88955	3.7052	0.269891	0.76615	2.4663	0.0136518	0.0456449	ENSG00000122584	NXPH1	ENSG00000122584	NXPH1
ENSDARG00000059606	ccdc84	8.84874	1.88952	3.70513	0.269896	0.381044	4.95881	7.09274e-07	1.06923e-05	ENSG00000186166	CCDC84	ENSG00000186166	CCDC84
ENSDARG00000101323	trnau1apa	82.0341	1.88768	3.70041	0.27024	0.280612	6.72702	1.73178e-11	1.11746e-09	ENSG00000180098	TRNAU1AP	ENSG00000180098	TRNAU1AP
ENSDARG00000059613	nprl2	29.9974	1.8858	3.69558	0.270593	0.309566	6.09176	1.11674e-09	4.24292e-08	ENSG00000114388	NPRL2	ENSG00000114388	NPRL2
ENSDARG00000071211	zgc:112255	55.0242	1.88434	3.69184	0.270868	0.237639	7.92943	2.20158e-15	4.38474e-13	ENSG00000164008	C1orf50	ENSG00000164008	C1orf50
ENSDARG00000067777		5.21215	1.87914	3.67856	0.271845	0.624013	3.01139	0.00260059	0.0116618	ENSG00000081870	HSPB11	ENSG00000081870	HSPB11
ENSDARG00000105352	hist1h4l	1.99557	1.87906	3.67835	0.271861	0.721728	2.60355	0.00922628	0.0332181	ENSG00000276180	HIST1H4I	ENSG00000276180	HIST1H4I
ENSDARG00000071500	fam207a	46.3973	1.87822	3.67622	0.272019	0.311303	6.03342	1.60523e-09	5.71711e-08	ENSG00000160256	FAM207A	ENSG00000160256	FAM207A
ENSDARG00000062341	wfs1a	83.3099	1.87804	3.67575	0.272053	0.831339	2.25905	0.02388	0.07224	ENSG00000109501	WFS1	ENSG00000109501	WFS1
ENSDARG00000034957	hddc2	40.2392	1.87644	3.67168	0.272355	0.269061	6.97404	3.07974e-12	2.61437e-10	ENSG00000111906	HDDC2	ENSG00000111906	HDDC2
ENSDARG00000104696	apooa	52.5468	1.87608	3.67077	0.272423	0.299541	6.26319	3.77173e-10	1.64126e-08	ENSG00000184831	APOO	ENSG00000184831	APOO
ENSDARG00000075795	nol7	113.539	1.87607	3.67073	0.272425	0.299682	6.2602	3.84481e-10	1.66955e-08	ENSG00000225921	NOL7	ENSG00000225921	NOL7
ENSDARG00000098017	pet100	21.9428	1.87186	3.66005	0.273221	0.445734	4.19951	2.67498e-05	0.000243976	ENSG00000229833	PET100	ENSG00000229833	PET100
ENSDARG00000044514	st6gal1	29.7256	1.87072	3.65714	0.273437	0.678619	2.75665	0.00583962	0.0228219	ENSG00000073849	ST6GAL1	ENSG00000073849	ST6GAL1
ENSDARG00000090664	moto	109.689	1.87016	3.65573	0.273543	0.463586	4.03412	5.48079e-05	0.000447648	ENSG00000180336	MEIOC	ENSG00000180336	MEIOC
ENSDARG00000043986	setd6	19.9622	1.87013	3.65566	0.273548	0.374408	4.9949	5.88658e-07	9.13324e-06	ENSG00000103037	SETD6	ENSG00000103037	SETD6
ENSDARG00000052748	capn1b	14.2972	1.86695	3.64761	0.274152	0.345289	5.40693	6.41144e-08	1.35097e-06	ENSG00000137225	CAPN11	ENSG00000137225	CAPN11
ENSDARG00000054952	si:dkey-34o23.2	15.0629	1.86594	3.64505	0.274344	0.810844	2.30123	0.0213785	0.0659635
ENSDARG00000105340	zgc:112234	1.42121	1.86011	3.63036	0.275455	0.865352	2.14954	0.0315914	0.0905063	ENSG00000146047	HIST1H2BA	ENSG00000146047	HIST1H2BA
ENSDARG00000056030	hoxb7a	14.2468	1.86	3.63008	0.275476	0.40617	4.57937	4.6638e-06	5.41791e-05	ENSG00000260027	HOXB7	ENSG00000260027	HOXB7
ENSDARG00000060002	ogg1	21.5094	1.85895	3.62743	0.275677	0.489859	3.79487	0.000147723	0.00103968	ENSG00000114026	OGG1	ENSG00000114026	OGG1
ENSDARG00000039133	lamb4	13.0673	1.85426	3.61566	0.276575	0.785128	2.36173	0.01819	0.057911	ENSG00000091128	LAMB4	ENSG00000091128	LAMB4
ENSDARG00000089936	sepw2b	24.5973	1.85365	3.61415	0.276691	0.413968	4.47778	7.54245e-06	8.20519e-05	ENSG00000141741	MIEN1	ENSG00000141741	MIEN1
ENSDARG00000075984	hsbp1l1	9.67766	1.84957	3.60393	0.277475	0.443454	4.17083	3.03493e-05	0.000271975	ENSG00000230989	HSBP1	ENSG00000230989	HSBP1
ENSDARG00000095590	spp2	226.503	1.84916	3.60291	0.277554	0.671709	2.75292	0.00590667	0.0230275	ENSG00000072080	SPP2	ENSG00000072080	SPP2
ENSDARG00000055868	rsl1d1	222.727	1.84844	3.60111	0.277692	0.24548	7.52991	5.07747e-14	6.91906e-12	ENSG00000171490	RSL1D1	ENSG00000171490	RSL1D1
ENSDARG00000026335	susd4	39.769	1.84664	3.59663	0.278038	0.4158	4.44118	8.94659e-06	9.48366e-05	ENSG00000143502	SUSD4	ENSG00000143502	SUSD4
ENSDARG00000098942	rp9	57.7236	1.84636	3.59592	0.278093	0.299744	6.1598	7.2839e-10	2.91257e-08	ENSG00000164610	RP9	ENSG00000164610	RP9
ENSDARG00000059805	slc25a38a	35.4808	1.84318	3.588	0.278707	0.541545	3.40356	0.000665135	0.00373055	ENSG00000144659	SLC25A38	ENSG00000144659	SLC25A38
ENSDARG00000014941	tprkb	15.5713	1.84271	3.58684	0.278797	0.401328	4.59155	4.39973e-06	5.15451e-05	ENSG00000144034	TPRKB	ENSG00000144034	TPRKB
ENSDARG00000102992	btr20	16.3457	1.83851	3.5764	0.279611	0.834036	2.20435	0.0274995	0.0811624	ENSG00000223638	RFPL4A
ENSDARG00000013863	fam133b	83.0809	1.83781	3.57468	0.279745	0.239789	7.66429	1.79816e-14	2.66038e-12	ENSG00000179083	FAM133A
ENSDARG00000025972	mcts1	141.286	1.83774	3.57449	0.27976	0.22912	8.02083	1.05032e-15	2.3647e-13	ENSG00000232119	MCTS1	ENSG00000232119	MCTS1
ENSDARG00000093403	si:ch73-376l24.4	9.59763	1.83641	3.57121	0.280017	0.691287	2.65651	0.00789534	0.0292866	ENSG00000125482	TTF1	ENSG00000125482	TTF1
ENSDARG00000041340	mrpl51	93.6946	1.83356	3.56416	0.280571	0.255916	7.1647	7.79581e-13	7.91999e-11	ENSG00000111639	MRPL51	ENSG00000111639	MRPL51
ENSDARG00000039208	nasp	1441.03	1.83063	3.55693	0.281141	0.828447	2.20972	0.0271249	0.0803085	ENSG00000132780	NASP	ENSG00000132780	NASP
ENSDARG00000078606	zgc:194224	12.4052	1.82819	3.55092	0.281617	0.386514	4.72995	2.24571e-06	2.9054e-05	ENSG00000143633	C1orf131	ENSG00000143633	C1orf131
ENSDARG00000060069	isoc1	39.0057	1.82651	3.54678	0.281946	0.272141	6.71165	1.92436e-11	1.22268e-09	ENSG00000066583	ISOC1	ENSG00000066583	ISOC1
ENSDARG00000044562	cycsb	745.359	1.82531	3.54383	0.282181	0.244439	7.46732	8.18422e-14	1.0595e-11
ENSDARG00000070453	gch1	134.973	1.82471	3.54235	0.282298	0.510042	3.57757	0.000346809	0.00215332	ENSG00000131979	GCH1	ENSG00000131979	GCH1
ENSDARG00000062042	mthfsd	10.7098	1.82377	3.54004	0.282483	0.479112	3.80656	0.000140915	0.000998898	ENSG00000103248	MTHFSD	ENSG00000103248	MTHFSD
ENSDARG00000045846	osgep	30.4432	1.82354	3.53949	0.282527	0.262415	6.94906	3.6773e-12	3.02254e-10	ENSG00000092094	OSGEP	ENSG00000092094	OSGEP
ENSDARG00000069045	chtf8	40.9452	1.82268	3.53737	0.282696	0.368798	4.94221	7.724e-07	1.15514e-05	ENSG00000168802	CHTF8	ENSG00000168802	CHTF8
ENSDARG00000068941	zgc:113983	7.44545	1.82149	3.53446	0.282928	0.608609	2.99287	0.00276365	0.0122577
ENSDARG00000042345	si:dkeyp-55f12.3	16.3694	1.81417	3.51656	0.284369	0.37988	4.77563	1.79143e-06	2.39702e-05
ENSDARG00000105507	zgc:112234	6.36222	1.81336	3.5146	0.284527	0.506984	3.57676	0.00034788	0.00215754	ENSG00000146047	HIST1H2BA	ENSG00000146047	HIST1H2BA
ENSDARG00000056213	si:ch73-130a3.4	28.9822	1.81308	3.51392	0.284582	0.460475	3.93742	8.2363e-05	0.000631846	ENSG00000174796	THAP6	ENSG00000174796	THAP6
ENSDARG00000099161	dnaaf4	47.7558	1.81247	3.51244	0.284703	0.440774	4.11202	3.92213e-05	0.000337232	ENSG00000256061	DNAAF4	ENSG00000256061	DNAAF4
ENSDARG00000099690	vaspa	16.6688	1.80886	3.50366	0.285416	0.739101	2.44738	0.0143899	0.0476359	ENSG00000125753	VASP	ENSG00000125753	VASP
ENSDARG00000009544	cldnb	71.6037	1.80819	3.50202	0.28555	0.781328	2.31425	0.0206541	0.0640911	ENSG00000189143	CLDN4
ENSDARG00000015930	rwdd1	133.017	1.80816	3.50197	0.285554	0.22361	8.08626	6.15257e-16	1.49927e-13	ENSG00000111832	RWDD1	ENSG00000111832	RWDD1
ENSDARG00000069521	vps29	89.2804	1.80811	3.50182	0.285566	0.238254	7.58897	3.22454e-14	4.51283e-12	ENSG00000111237	VPS29	ENSG00000111237	VPS29
ENSDARG00000023151	ucp1	4827.75	1.80761	3.50063	0.285663	0.655861	2.75609	0.00584962	0.022848
ENSDARG00000069624	mrps18c	46.8452	1.80701	3.49916	0.285783	0.218237	8.28002	1.23153e-16	3.64411e-14	ENSG00000163319	MRPS18C	ENSG00000163319	MRPS18C
ENSDARG00000009685	ppa2	19.8189	1.80405	3.49198	0.28637	0.320636	5.62646	1.83949e-08	4.59607e-07	ENSG00000138777	PPA2	ENSG00000138777	PPA2
ENSDARG00000002546	rundc3ab	18.0595	1.80214	3.48736	0.286749	0.450548	3.99988	6.3374e-05	0.000505524	ENSG00000108309	RUNDC3A	ENSG00000108309	RUNDC3A
ENSDARG00000034430	zgc:172121	7.43188	1.79996	3.48211	0.287182	0.611124	2.94533	0.00322611	0.0139068
ENSDARG00000018281	cfap161	34.8953	1.79791	3.47716	0.287591	0.414982	4.3325	1.47424e-05	0.000145133	ENSG00000156206	CFAP161	ENSG00000156206	CFAP161
ENSDARG00000002707	her11	2.50181	1.79653	3.47383	0.287867	0.82365	2.18118	0.0291701	0.0850599	ENSG00000179111	HES7	ENSG00000179111	HES7
ENSDARG00000055719	ino80c	80.115	1.79512	3.47044	0.288147	0.288613	6.21982	4.97724e-10	2.09967e-08	ENSG00000267140	AC007998.2
ENSDARG00000068982	si:rp71-56i13.6	115.272	1.79469	3.4694	0.288234	0.488955	3.67046	0.000242119	0.00159156	ENSG00000109944	JHY	ENSG00000109944	JHY
ENSDARG00000033533	ccdc115	42.159	1.7943	3.46846	0.288312	0.31883	5.62776	1.82565e-08	4.56698e-07	ENSG00000136710	CCDC115	ENSG00000136710	CCDC115
ENSDARG00000090424	camk2n2	1.31428	1.78796	3.45327	0.28958	0.849435	2.10489	0.0353011	0.098743	ENSG00000163888	CAMK2N2	ENSG00000163888	CAMK2N2
ENSDARG00000077481	si:dkey-76k16.6	21.0198	1.78589	3.44831	0.289997	0.712995	2.50477	0.0122531	0.0418466	ENSG00000149124	GLYAT
ENSDARG00000045567	phpt1	35.8147	1.78539	3.44713	0.290097	0.261947	6.81586	9.36994e-12	6.60748e-10	ENSG00000054148	PHPT1	ENSG00000054148	PHPT1
ENSDARG00000099672	capgb	78.9303	1.78413	3.44412	0.29035	0.246643	7.23366	4.70145e-13	5.09849e-11	ENSG00000042493	CAPG	ENSG00000042493	CAPG
ENSDARG00000093709	si:dkeyp-7a3.1	3.9659	1.78252	3.44026	0.290675	0.809717	2.20141	0.027707	0.0816467	ENSG00000166960	CCDC178	ENSG00000166960	CCDC178
ENSDARG00000003846	mrpl21	64.3291	1.78248	3.44016	0.290684	0.289253	6.16234	7.16762e-10	2.87162e-08	ENSG00000197345	MRPL21	ENSG00000197345	MRPL21
ENSDARG00000077580	tspeara	11.7516	1.78135	3.43747	0.290911	0.668073	2.6664	0.00766683	0.0285874	ENSG00000175894	TSPEAR	ENSG00000175894	TSPEAR
ENSDARG00000044567	ttc1	98.8559	1.78106	3.43679	0.290969	0.267981	6.64622	3.00716e-11	1.8266e-09	ENSG00000113312	TTC1	ENSG00000113312	TTC1
ENSDARG00000017036	si:dkeyp-57f11.2	234.549	1.77871	3.43119	0.291444	0.501196	3.54893	0.000386793	0.00234946
ENSDARG00000036875	rps12	1704.05	1.77826	3.43012	0.291535	0.261364	6.80377	1.01916e-11	7.10771e-10	ENSG00000112306	RPS12	ENSG00000112306	RPS12
ENSDARG00000092849	si:ch73-92e7.4	12.672	1.77776	3.42892	0.291637	0.444673	3.99789	6.3909e-05	0.000508742
ENSDARG00000093129	si:rp71-45k5.2	4.32191	1.77699	3.4271	0.291792	0.538825	3.2979	0.000974109	0.0051275
ENSDARG00000088377	rp1l1b	6.9467	1.77578	3.42422	0.292037	0.817642	2.17183	0.0298688	0.0866489	ENSG00000183638	RP1L1	ENSG00000183638	RP1L1
ENSDARG00000016918	ace2	2245.03	1.77558	3.42376	0.292077	0.387426	4.58302	4.58316e-06	5.34521e-05	ENSG00000130234	ACE2	ENSG00000130234	ACE2
ENSDARG00000099560	lyrm5a	39.5656	1.77544	3.42342	0.292105	0.304309	5.83433	5.4006e-09	1.60262e-07	ENSG00000205707	ETFRF1	ENSG00000205707	ETFRF1
ENSDARG00000060169	mns1	62.723	1.77483	3.42197	0.29223	0.514506	3.44957	0.000561472	0.0032413	ENSG00000138587	MNS1	ENSG00000138587	MNS1
ENSDARG00000009885	sult3st1	6.26816	1.77409	3.42021	0.29238	0.360615	4.91961	8.67173e-07	1.27479e-05
ENSDARG00000007065	mrps18b	75.5233	1.77328	3.4183	0.292543	0.258102	6.87047	6.39907e-12	4.83737e-10	ENSG00000204568	MRPS18B	ENSG00000204568	MRPS18B
ENSDARG00000104024	ccdc137	45.5976	1.77306	3.41779	0.292587	0.282112	6.28497	3.27916e-10	1.47655e-08	ENSG00000185298	CCDC137	ENSG00000185298	CCDC137
ENSDARG00000102003	CU695215.3	2.42652	1.77298	3.4176	0.292603	0.548309	3.23355	0.00122263	0.00621912	ENSG00000248905	FMN1	ENSG00000248905	FMN1
ENSDARG00000103000	si:ch211-107p11.3	5.69053	1.77116	3.41329	0.292973	0.625176	2.83306	0.00461049	0.01877
ENSDARG00000092667	si:ch211-271e10.2	6.11901	1.77108	3.4131	0.292989	0.743939	2.38068	0.0172805	0.0554589
ENSDARG00000101319	si:ch73-299h12.6	22.3461	1.77066	3.4121	0.293074	0.397621	4.45314	8.46244e-06	9.0445e-05
ENSDARG00000103367	si:ch211-127m7.2	15.6881	1.77018	3.41098	0.293171	0.340175	5.20375	1.95305e-07	3.55166e-06
ENSDARG00000101112		2.02945	1.76969	3.4098	0.293272	0.702357	2.51964	0.0117474	0.0404193
ENSDARG00000039422	fuom	11.0551	1.76855	3.40712	0.293503	0.366469	4.82592	1.39359e-06	1.9438e-05	ENSG00000148803	FUOM	ENSG00000148803	FUOM
ENSDARG00000079499	stk32a	2.61183	1.76846	3.40689	0.293522	0.796286	2.22088	0.026359	0.078332	ENSG00000169302	STK32A	ENSG00000169302	STK32A
ENSDARG00000071518	krt222	32.0922	1.76829	3.4065	0.293556	0.432643	4.08718	4.36646e-05	0.000370211	ENSG00000264058	AC073508.2
ENSDARG00000033138	lyrm2	22.7003	1.76582	3.40067	0.29406	0.366895	4.81287	1.48778e-06	2.06282e-05	ENSG00000083099	LYRM2	ENSG00000083099	LYRM2
ENSDARG00000044276	spp1	165.018	1.76475	3.39815	0.294278	0.557314	3.16653	0.0015427	0.007531
ENSDARG00000097920	tex36	6.42719	1.76262	3.39314	0.294712	0.793575	2.22112	0.0263432	0.0783074	ENSG00000175018	TEX36	ENSG00000175018	TEX36
ENSDARG00000037392	med19a	95.5724	1.76187	3.39138	0.294866	0.256234	6.87603	6.15445e-12	4.7025e-10	ENSG00000156603	MED19	ENSG00000156603	MED19
ENSDARG00000068262	vamp5	76.5583	1.7617	3.39097	0.294901	0.37747	4.66712	3.05452e-06	3.77495e-05	ENSG00000168899	VAMP5	ENSG00000168899	VAMP5
ENSDARG00000067995	myhz1.2	8461.01	1.76068	3.38859	0.295108	0.546515	3.22166	0.00127451	0.00643563	ENSG00000109061	MYH1	ENSG00000109061	MYH1
ENSDARG00000074340	serf2	157.02	1.75929	3.38531	0.295394	0.291077	6.04407	1.50274e-09	5.42268e-08	ENSG00000205572	SERF1B
ENSDARG00000059423	prune2	45.9952	1.75743	3.38096	0.295774	0.712693	2.4659	0.0136668	0.0456876	ENSG00000106772	PRUNE2	ENSG00000106772	PRUNE2
ENSDARG00000067665	fam167aa	2.92045	1.75549	3.37642	0.296172	0.724605	2.42269	0.0154061	0.0502927	ENSG00000154319	FAM167A	ENSG00000154319	FAM167A
ENSDARG00000009753	sf3b6	113.257	1.755	3.37526	0.296274	0.264577	6.63322	3.28431e-11	1.97182e-09	ENSG00000115128	SF3B6	ENSG00000115128	SF3B6
ENSDARG00000036764	hax1	78.1028	1.75441	3.37388	0.296394	0.219619	7.98842	1.36677e-15	2.85959e-13	ENSG00000143575	HAX1	ENSG00000143575	HAX1
ENSDARG00000086450	tdg.2	13.5064	1.74709	3.35682	0.297901	0.567458	3.07881	0.0020783	0.00966498	ENSG00000139372	TDG	ENSG00000139372	TDG
ENSDARG00000092898	si:ch211-157j23.3	17.0322	1.74563	3.35341	0.298204	0.800526	2.1806	0.0292129	0.0851499
ENSDARG00000101812	zgc:114120	6.40045	1.74439	3.35054	0.298459	0.405685	4.29988	1.70894e-05	0.000165177
ENSDARG00000092895	si:dkey-188i13.11	77.4188	1.74304	3.3474	0.29874	0.368878	4.72525	2.29829e-06	2.96417e-05	ENSG00000165949	IFI27
ENSDARG00000062880	cntn3a.1	5.21138	1.74289	3.34704	0.298772	0.549277	3.17305	0.00150845	0.00738327
ENSDARG00000101222	lsm10	5.6938	1.74283	3.34692	0.298783	0.47932	3.63605	0.000276847	0.00177951	ENSG00000181817	LSM10	ENSG00000181817	LSM10
ENSDARG00000060798	mrpl22	46.4122	1.74164	3.34415	0.29903	0.328307	5.30492	1.12723e-07	2.20893e-06	ENSG00000082515	MRPL22	ENSG00000082515	MRPL22
ENSDARG00000071410	cks2	42.5594	1.73977	3.33983	0.299417	0.267358	6.50728	7.65237e-11	4.0538e-09
ENSDARG00000002220	zgc:103692	65.1365	1.73857	3.33704	0.299667	0.320331	5.42742	5.71733e-08	1.23357e-06	ENSG00000136819	C9orf78	ENSG00000136819	C9orf78
ENSDARG00000030441	ppa1b	321.094	1.73798	3.33568	0.299789	0.233309	7.44927	9.38614e-14	1.18546e-11	ENSG00000180817	PPA1	ENSG00000180817	PPA1
ENSDARG00000068939	xaf1	65.0635	1.73729	3.33409	0.299932	0.382043	4.54738	5.43189e-06	6.18191e-05	ENSG00000132530	XAF1	ENSG00000132530	XAF1
ENSDARG00000037913	nmrk1	7.27542	1.73643	3.3321	0.300111	0.422031	4.11446	3.88082e-05	0.000334235	ENSG00000106733	NMRK1	ENSG00000106733	NMRK1
ENSDARG00000037892	psmc3ip	30.6812	1.73605	3.33123	0.30019	0.556351	3.12043	0.00180588	0.00860283	ENSG00000131470	PSMC3IP	ENSG00000131470	PSMC3IP
ENSDARG00000006981	ccdc113	30.9567	1.7353	3.32948	0.300348	0.745727	2.32698	0.0199661	0.0622958	ENSG00000103021	CCDC113	ENSG00000103021	CCDC113
ENSDARG00000017168	nr2f1b	3.9777	1.73529	3.32947	0.300348	0.758451	2.28794	0.0221409	0.0678609
ENSDARG00000039381	ch25hl1.1	8.17682	1.7345	3.32765	0.300513	0.485018	3.57616	0.000348677	0.00216038
ENSDARG00000043667	zgc:100997	5.17807	1.73331	3.32489	0.300761	0.476322	3.63894	0.000273762	0.00176484	ENSG00000165959	CLMN	ENSG00000165959	CLMN
ENSDARG00000078352	lyrm4	21.4104	1.73314	3.3245	0.300797	0.321123	5.39712	6.77197e-08	1.41828e-06	ENSG00000214113	LYRM4	ENSG00000214113	LYRM4
ENSDARG00000104288	hfm1	73.1232	1.73244	3.32289	0.300943	0.571839	3.02959	0.00244886	0.0110822	ENSG00000162669	HFM1	ENSG00000162669	HFM1
ENSDARG00000099981	si:ch1073-228h2.2	15.7711	1.73203	3.32194	0.301029	0.527792	3.28164	0.00103204	0.00538321
ENSDARG00000105575	si:dkey-6n21.12	23.1332	1.73186	3.32156	0.301063	0.326267	5.30811	1.10768e-07	2.17825e-06
ENSDARG00000102594	zgc:194627	7.51001	1.72723	3.31091	0.302031	0.5577	3.09706	0.00195453	0.00917801
ENSDARG00000075433	myom2a	2086.81	1.72591	3.3079	0.302307	0.341313	5.05669	4.26603e-07	6.93037e-06	ENSG00000036448	MYOM2	ENSG00000036448	MYOM2
ENSDARG00000023532	pinx1	150.76	1.72566	3.30731	0.302361	0.288912	5.97295	2.33008e-09	7.8349e-08	ENSG00000254093	PINX1	ENSG00000254093	PINX1
ENSDARG00000045372	ngdn	60.6048	1.72452	3.30471	0.302599	0.249698	6.90644	4.96972e-12	3.95915e-10	ENSG00000129460	NGDN	ENSG00000129460	NGDN
ENSDARG00000078113	atp5ia	122.643	1.7245	3.30466	0.302603	0.243446	7.08369	1.40365e-12	1.34601e-10	ENSG00000169020	ATP5I	ENSG00000169020	ATP5I
ENSDARG00000017388	gstt1b	119.819	1.72379	3.30303	0.302752	0.274573	6.27807	3.42807e-10	1.52686e-08	ENSG00000276950	GSTTP1
ENSDARG00000015531	slc4a8	23.7146	1.7229	3.301	0.302938	0.543663	3.16906	0.0015293	0.00747086	ENSG00000050438	SLC4A8	ENSG00000050438	SLC4A8
ENSDARG00000040582	c18h3orf33	4.38502	1.71983	3.29396	0.303586	0.540433	3.18231	0.00146107	0.00718838	ENSG00000174928	C3orf33	ENSG00000174928	C3orf33
ENSDARG00000040534	epcam	944.562	1.71936	3.2929	0.303684	0.480825	3.57585	0.000349087	0.00216198	ENSG00000119888	EPCAM
ENSDARG00000056235	smndc1	122.53	1.71891	3.29188	0.303778	0.241551	7.11614	1.10991e-12	1.08956e-10	ENSG00000119953	SMNDC1	ENSG00000119953	SMNDC1
ENSDARG00000103002	nptna	34.0789	1.71658	3.28655	0.30427	0.43681	3.9298	8.50156e-05	0.000648115	ENSG00000156642	NPTN	ENSG00000156642	NPTN
ENSDARG00000070589	mrpl35	32.7655	1.71556	3.28424	0.304485	0.272579	6.2938	3.09789e-10	1.41025e-08	ENSG00000132313	MRPL35	ENSG00000132313	MRPL35
ENSDARG00000070407	fam206a	9.77629	1.71367	3.27994	0.304884	0.401255	4.27077	1.94797e-05	0.000184999	ENSG00000119328	FAM206A	ENSG00000119328	FAM206A
ENSDARG00000055589	s100t	5.51506	1.71115	3.27421	0.305417	0.546398	3.13169	0.00173804	0.00832179
ENSDARG00000035167	mrpl48	42.5266	1.70997	3.27153	0.305667	0.292661	5.84283	5.13218e-09	1.53839e-07	ENSG00000175581	MRPL48	ENSG00000175581	MRPL48
ENSDARG00000006408	hmgb3b	270.447	1.70874	3.26875	0.305927	0.238878	7.15318	8.47921e-13	8.56731e-11	ENSG00000029993	HMGB3	ENSG00000029993	HMGB3
ENSDARG00000007409	ppifa	23.8594	1.70793	3.26692	0.306098	0.33685	5.0703	3.97182e-07	6.53442e-06
ENSDARG00000075619	cenpo	21.8147	1.70425	3.2586	0.306881	0.77805	2.19041	0.0284943	0.0834916	ENSG00000138092	CENPO	ENSG00000138092	CENPO
ENSDARG00000037835	polr3k	21.3333	1.70413	3.25832	0.306907	0.292491	5.82625	5.66866e-09	1.65373e-07	ENSG00000161980	POLR3K	ENSG00000161980	POLR3K
ENSDARG00000027710	btbd16	20.171	1.70373	3.25742	0.306992	0.475547	3.58267	0.000340094	0.00211543	ENSG00000138152	BTBD16	ENSG00000138152	BTBD16
ENSDARG00000039669	TSTA3 (1 of many)	61.4973	1.7036	3.25713	0.307019	0.636305	2.67733	0.00742106	0.0278095	ENSG00000104522	TSTA3	ENSG00000104522	TSTA3
ENSDARG00000069867	fam188b2	4.4509	1.70252	3.25468	0.30725	0.454104	3.74917	0.000177419	0.00121004	ENSG00000214237	MINDY4B	ENSG00000214237	MINDY4B
ENSDARG00000045352	cst14a.2	81.01	1.7016	3.25262	0.307444	0.193734	8.78319	1.58898e-18	7.65409e-16	ENSG00000121552	CSTA
ENSDARG00000004274	zgc:112496	34.5159	1.70018	3.2494	0.307749	0.296824	5.72789	1.01685e-08	2.77864e-07
ENSDARG00000017880	kcnip3b	4.39059	1.69959	3.24809	0.307873	0.656379	2.58934	0.0096159	0.0343158	ENSG00000115041	KCNIP3	ENSG00000115041	KCNIP3
ENSDARG00000045316	map7d2b	23.2371	1.69908	3.24694	0.307983	0.403434	4.21154	2.53638e-05	0.000233286	ENSG00000184368	MAP7D2	ENSG00000184368	MAP7D2
ENSDARG00000012796	hnmt	22.1794	1.69638	3.24088	0.308558	0.391573	4.33223	1.47604e-05	0.000145241	ENSG00000150540	HNMT	ENSG00000150540	HNMT
ENSDARG00000011824	pbxip1b	122.519	1.69616	3.24038	0.308606	0.329446	5.14852	2.62544e-07	4.60074e-06
ENSDARG00000071339	borcs8	15.1595	1.69488	3.23749	0.308881	0.406466	4.16978	3.04891e-05	0.000272913	ENSG00000254901	BORCS8	ENSG00000254901	BORCS8
ENSDARG00000068175	ing5b	70.622	1.69438	3.23638	0.308987	0.523384	3.23736	0.00120641	0.00615324	ENSG00000168395	ING5	ENSG00000168395	ING5
ENSDARG00000043502	ccdc124	188.835	1.69224	3.23157	0.309447	0.211519	8.0004	1.24013e-15	2.64813e-13	ENSG00000007080	CCDC124	ENSG00000007080	CCDC124
ENSDARG00000042391	odf3b	69.4415	1.69089	3.22856	0.309736	0.687504	2.45946	0.0139145	0.0463584	ENSG00000177989	ODF3B
ENSDARG00000104178	trir	85.3339	1.6898	3.22613	0.309969	0.229659	7.35789	1.86836e-13	2.21139e-11	ENSG00000123144	TRIR	ENSG00000123144	TRIR
ENSDARG00000104028	si:dkey-74k8.3	56.0521	1.68968	3.22585	0.309996	0.66065	2.5576	0.0105397	0.0370141
ENSDARG00000051770	zgc:110434	1.52247	1.68898	3.22428	0.310146	0.763406	2.21242	0.0269374	0.0798217	ENSG00000184270	HIST2H2AB	ENSG00000184270	HIST2H2AB
ENSDARG00000076838	apom	555.438	1.68816	3.22246	0.310322	0.739231	2.28367	0.0223907	0.0684667	ENSG00000204444	APOM	ENSG00000204444	APOM
ENSDARG00000103472	nedd8l	81.6	1.68806	3.22223	0.310344	0.276131	6.11325	9.76234e-10	3.77253e-08	ENSG00000129559	NEDD8	ENSG00000129559	NEDD8
ENSDARG00000099514	zgc:112234	2.4508	1.68803	3.22217	0.31035	0.707688	2.38528	0.0170663	0.0548563	ENSG00000146047	HIST1H2BA	ENSG00000146047	HIST1H2BA
ENSDARG00000008068	tma16	37.7035	1.68786	3.22179	0.310387	0.246188	6.85598	7.08262e-12	5.23937e-10	ENSG00000198498	TMA16	ENSG00000198498	TMA16
ENSDARG00000005172	dynll2b	110.361	1.68781	3.22167	0.310398	0.222869	7.5731	3.64412e-14	5.06582e-12	ENSG00000264364	DYNLL2	ENSG00000264364	DYNLL2
ENSDARG00000087556	pacrg	47.0489	1.68636	3.21844	0.310709	0.408315	4.13006	3.62672e-05	0.000315995	ENSG00000112530	PACRG	ENSG00000112530	PACRG
ENSDARG00000008333	znfl2a	26.7278	1.68612	3.2179	0.310761	0.354604	4.75494	1.98508e-06	2.61725e-05	ENSG00000256223	ZNF10
ENSDARG00000054136	ccdc105	51.505	1.68533	3.21613	0.310932	0.652734	2.58195	0.00982433	0.0348922	ENSG00000160994	CCDC105	ENSG00000160994	CCDC105
ENSDARG00000024492	col9a2	48.1952	1.68393	3.21303	0.311233	0.670845	2.51017	0.0120673	0.0413602	ENSG00000049089	COL9A2	ENSG00000049089	COL9A2
ENSDARG00000060280	pde9a	12.8725	1.68233	3.20945	0.31158	0.460363	3.65434	0.000257841	0.00167734	ENSG00000160191	PDE9A	ENSG00000160191	PDE9A
ENSDARG00000067990	myhz1.1	14155.5	1.67875	3.20151	0.312352	0.678996	2.47241	0.0134207	0.0450339	ENSG00000109061	MYH1	ENSG00000109061	MYH1
ENSDARG00000100397	pde6c	17.2581	1.67751	3.19875	0.312622	0.569635	2.94488	0.0032308	0.0139224	ENSG00000095464	PDE6C	ENSG00000095464	PDE6C
ENSDARG00000100452	nop53	273.463	1.67747	3.19867	0.31263	0.267166	6.27877	3.41258e-10	1.52487e-08	ENSG00000105373	NOP53	ENSG00000105373	NOP53
ENSDARG00000054033	hoxb1b	6.80067	1.67741	3.19854	0.312643	0.467735	3.58625	0.000335473	0.00209133
ENSDARG00000101901	zgc:193711	41.2794	1.67734	3.19837	0.312659	0.311415	5.38617	7.19732e-08	1.49227e-06
ENSDARG00000011727	b9d1	20.8489	1.67706	3.19775	0.31272	0.284389	5.89707	3.70023e-09	1.17191e-07	ENSG00000108641	B9D1	ENSG00000108641	B9D1
ENSDARG00000011825	cetn3	38.0761	1.67691	3.19742	0.312752	0.401903	4.17242	3.01378e-05	0.000270235	ENSG00000153140	CETN3	ENSG00000153140	CETN3
ENSDARG00000061416	c2cd4a	10.1132	1.67457	3.19225	0.313259	0.793441	2.11052	0.0348138	0.0977363	ENSG00000198535	C2CD4A
ENSDARG00000007320	rpl7	2950.73	1.67359	3.19007	0.313472	0.217126	7.70791	1.27896e-14	2.01728e-12	ENSG00000147604	RPL7	ENSG00000147604	RPL7
ENSDARG00000098911	zgc:153293	8.29306	1.67339	3.18964	0.313515	0.453744	3.68797	0.000226049	0.0014959	ENSG00000109881	CCDC34	ENSG00000109881	CCDC34
ENSDARG00000026072	pdcd5	122.168	1.67191	3.18637	0.313837	0.229126	7.29691	2.94457e-13	3.33284e-11	ENSG00000105185	PDCD5	ENSG00000105185	PDCD5
ENSDARG00000025672	antxr1a	9.70222	1.67065	3.18358	0.314112	0.431819	3.86887	0.000109341	0.000803399	ENSG00000169604	ANTXR1	ENSG00000169604	ANTXR1
ENSDARG00000103404	uchl5	69.9289	1.66971	3.1815	0.314317	0.236592	7.05734	1.69722e-12	1.58551e-10	ENSG00000116750	UCHL5	ENSG00000116750	UCHL5
ENSDARG00000100912	zgc:162297	16.3597	1.66964	3.18136	0.314331	0.29507	5.65848	1.5272e-08	3.9053e-07
ENSDARG00000036784	commd7	20.4455	1.6694	3.18082	0.314384	0.347112	4.80939	1.51391e-06	2.08971e-05	ENSG00000149600	COMMD7	ENSG00000149600	COMMD7
ENSDARG00000092458	si:dkey-282h22.5	16.9885	1.66769	3.17706	0.314757	0.433691	3.84534	0.000120384	0.000872777
ENSDARG00000100025	si:ch211-231f6.6	24.6176	1.66737	3.17635	0.314826	0.36777	4.53374	5.79488e-06	6.52688e-05	ENSG00000174109	C16orf91	ENSG00000174109	C16orf91
ENSDARG00000098687	pygo1	19.4426	1.666	3.17334	0.315125	0.35274	4.72304	2.32349e-06	2.99294e-05	ENSG00000171016	PYGO1	ENSG00000171016	PYGO1
ENSDARG00000039752	si:ch73-308m11.1	69.683	1.66597	3.17328	0.315132	0.35069	4.75056	2.02855e-06	2.66777e-05	ENSG00000213203	GIMAP1
ENSDARG00000024416	twistnb	93.2099	1.66541	3.17204	0.315255	0.260498	6.39318	1.62476e-10	7.93717e-09	ENSG00000105849	TWISTNB	ENSG00000105849	TWISTNB
ENSDARG00000098445	si:ch211-1o7.2	20.3484	1.66236	3.16535	0.315921	0.561894	2.9585	0.0030914	0.0134408	ENSG00000144031	ANKRD53	ENSG00000144031	ANKRD53
ENSDARG00000099796	si:dkey-285b23.3	17.3937	1.66216	3.1649	0.315966	0.379217	4.38313	1.16986e-05	0.000119014
ENSDARG00000029100	chchd1	66.0519	1.66045	3.16115	0.316341	0.260096	6.38398	1.72538e-10	8.31113e-09	ENSG00000172586	CHCHD1	ENSG00000172586	CHCHD1
ENSDARG00000022007	zgc:66426	23.6777	1.65843	3.15672	0.316784	0.429691	3.85959	0.00011358	0.000831004
ENSDARG00000018351	hpda	2730.4	1.65695	3.15349	0.317109	0.708969	2.33712	0.0194328	0.0609682
ENSDARG00000070953	pla2g4f.2	13.9198	1.65661	3.15275	0.317183	0.626861	2.64271	0.00822459	0.0302693	ENSG00000159337	PLA2G4D
ENSDARG00000043404	rpp21	39.183	1.65612	3.15168	0.317291	0.503647	3.28826	0.0010081	0.00528224	ENSG00000241370	RPP21	ENSG00000241370	RPP21
ENSDARG00000004049	marcksa	10.7515	1.6551	3.14946	0.317515	0.337921	4.89791	9.6863e-07	1.40894e-05	ENSG00000277443	MARCKS	ENSG00000277443	MARCKS
ENSDARG00000076334	mrpl43	63.5108	1.65343	3.14582	0.317883	0.227025	7.28304	3.26381e-13	3.63458e-11	ENSG00000055950	MRPL43	ENSG00000055950	MRPL43
ENSDARG00000055876	msmo1	712.357	1.65262	3.14404	0.318063	0.431649	3.82861	0.000128867	0.000926114	ENSG00000052802	MSMO1	ENSG00000052802	MSMO1
ENSDARG00000044135	cenpp	17.1502	1.65261	3.14402	0.318064	0.419549	3.93901	8.1818e-05	0.000627897	ENSG00000188312	CENPP	ENSG00000188312	CENPP
ENSDARG00000097057	fxyd6l	76.2808	1.65119	3.14093	0.318377	0.24727	6.67769	2.42731e-11	1.5008e-09	ENSG00000137731	FXYD2	ENSG00000137731	FXYD2
ENSDARG00000023299	snu13b	222.715	1.65039	3.13919	0.318554	0.349749	4.71878	2.37259e-06	3.04671e-05	ENSG00000100138	SNU13	ENSG00000100138	SNU13
ENSDARG00000038894	tmx3	3.3546	1.6496	3.13747	0.318728	0.599425	2.75197	0.00592372	0.0230809	ENSG00000166479	TMX3	ENSG00000166479	TMX3
ENSDARG00000069498	phkg1b	6.23443	1.64914	3.13646	0.318831	0.513852	3.20936	0.0013303	0.00666534	ENSG00000164776	PHKG1	ENSG00000164776	PHKG1
ENSDARG00000020015	mrps33	44.3915	1.64881	3.13575	0.318903	0.263228	6.26381	3.75677e-10	1.63819e-08	ENSG00000090263	MRPS33	ENSG00000090263	MRPS33
ENSDARG00000094345	si:dkey-261l7.2	25.3745	1.6485	3.13507	0.318972	0.353552	4.66267	3.12126e-06	3.84951e-05
ENSDARG00000041378	sh2d4a	29.0508	1.64674	3.13126	0.31936	0.240061	6.85969	6.90114e-12	5.15263e-10	ENSG00000104611	SH2D4A	ENSG00000104611	SH2D4A
ENSDARG00000102018	bty	31.1729	1.64426	3.12587	0.319911	0.624414	2.63328	0.00845647	0.0309086	ENSG00000223638	RFPL4A
ENSDARG00000086310	zgc:194508	11.1446	1.64196	3.1209	0.32042	0.552135	2.97384	0.00294095	0.0129196	ENSG00000183346	CABCOCO1	ENSG00000183346	CABCOCO1
ENSDARG00000089637	rnaseh2c	59.3563	1.63996	3.11658	0.320865	0.284299	5.76844	8.00098e-09	2.24559e-07	ENSG00000172922	RNASEH2C	ENSG00000172922	RNASEH2C
ENSDARG00000098475	arr3b	4.82047	1.63916	3.11485	0.321043	0.451724	3.62869	0.000284868	0.00182057	ENSG00000120500	ARR3	ENSG00000120500	ARR3
ENSDARG00000026400	rad51d	11.4236	1.63795	3.11223	0.321313	0.331577	4.93987	7.81734e-07	1.16574e-05	ENSG00000185379	RAD51D	ENSG00000185379	RAD51D
ENSDARG00000042659	thyn1	35.0946	1.63794	3.11221	0.321315	0.277224	5.90836	3.45522e-09	1.10615e-07	ENSG00000151500	THYN1	ENSG00000151500	THYN1
ENSDARG00000073850	hdac7b	14.1941	1.63779	3.11188	0.321349	0.412263	3.97268	7.10692e-05	0.000556754	ENSG00000061273	HDAC7	ENSG00000061273	HDAC7
ENSDARG00000079488	zgc:195282	5.31642	1.63662	3.10935	0.32161	0.67996	2.40693	0.0160873	0.0521546
ENSDARG00000043242	si:dkey-222f2.1	2.89967	1.63633	3.10874	0.321674	0.734796	2.22692	0.0259529	0.0773138
ENSDARG00000003526	psma5	186.954	1.6358	3.10761	0.321791	0.210734	7.7624	8.3336e-15	1.36995e-12	ENSG00000143106	PSMA5	ENSG00000143106	PSMA5
ENSDARG00000023236	kcnh1b	14.7731	1.63419	3.10413	0.322152	0.680759	2.40054	0.0163709	0.0529499	ENSG00000284299	AL590132.1
ENSDARG00000004260	cul5b	9.55093	1.63342	3.10248	0.322323	0.341347	4.78523	1.70792e-06	2.30163e-05	ENSG00000166266	CUL5	ENSG00000166266	CUL5
ENSDARG00000070011	si:ch211-167j6.4	2.84894	1.633	3.10158	0.322417	0.558903	2.9218	0.0034802	0.0147989
ENSDARG00000008502	pno1	206.33	1.63278	3.10109	0.322467	0.230745	7.07611	1.48261e-12	1.40868e-10	ENSG00000115946	PNO1	ENSG00000115946	PNO1
ENSDARG00000000212	krt97	654.122	1.63264	3.1008	0.322497	0.533758	3.05876	0.00222252	0.0102005	ENSG00000186393	KRT26
ENSDARG00000093382	uqcc3	26.2302	1.63234	3.10015	0.322565	0.28157	5.79728	6.73975e-09	1.92023e-07
ENSDARG00000039958	utp11l	45.966	1.63207	3.09956	0.322626	0.321543	5.07573	3.86014e-07	6.3811e-06	ENSG00000183520	UTP11	ENSG00000183520	UTP11
ENSDARG00000088924	si:dkey-185e18.7	55.3418	1.63084	3.09693	0.322901	0.506449	3.22014	0.00128127	0.00646031	ENSG00000151725	CENPU	ENSG00000151725	CENPU
ENSDARG00000036876	zgc:153284	18.0989	1.62934	3.09371	0.323236	0.305811	5.32793	9.93367e-08	1.98033e-06
ENSDARG00000100909	zgc:173581	10.9291	1.62845	3.09181	0.323435	0.609679	2.671	0.00756262	0.028265	ENSG00000223638	RFPL4A
ENSDARG00000095497	si:dkeyp-2e4.5	4.665	1.62757	3.08992	0.323633	0.460836	3.53177	0.00041279	0.00248767
ENSDARG00000059351	hnrnpa3	23.5045	1.62653	3.0877	0.323865	0.74476	2.18397	0.0289643	0.0845818	ENSG00000170144	HNRNPA3	ENSG00000170144	HNRNPA3
ENSDARG00000057010	si:dkey-154b15.1	18.7947	1.62506	3.08455	0.324197	0.385539	4.21503	2.49747e-05	0.000230218
ENSDARG00000070584	clic5b	317.552	1.62495	3.08431	0.324221	0.591387	2.74769	0.00600162	0.0233493	ENSG00000112782	CLIC5	ENSG00000112782	CLIC5
ENSDARG00000036070	znrd1	22.3898	1.62332	3.08084	0.324587	0.44004	3.68904	0.000225102	0.00149058	ENSG00000066379	ZNRD1	ENSG00000066379	ZNRD1
ENSDARG00000044102	znf593	54.3066	1.62275	3.07961	0.324716	0.251775	6.44523	1.15428e-10	5.84562e-09	ENSG00000142684	ZNF593	ENSG00000142684	ZNF593
ENSDARG00000068050	agbl4	6.056	1.62148	3.0769	0.325002	0.614897	2.63699	0.00836446	0.0306643	ENSG00000186094	AGBL4	ENSG00000186094	AGBL4
ENSDARG00000057529	itpa	14.9748	1.61917	3.07198	0.325523	0.650172	2.49037	0.0127611	0.0432602	ENSG00000125877	ITPA	ENSG00000125877	ITPA
ENSDARG00000036082	tph1b	13.3497	1.61899	3.0716	0.325563	0.400455	4.04288	5.27991e-05	0.000433463	ENSG00000129167	TPH1	ENSG00000129167	TPH1
ENSDARG00000027699	FUT9 (1 of many)	2.92997	1.61869	3.07095	0.325632	0.616775	2.62444	0.00867926	0.0315614	ENSG00000172461	FUT9	ENSG00000172461	FUT9
ENSDARG00000102929	zgc:101715	9.66373	1.61784	3.06916	0.325822	0.422888	3.8257	0.0001304	0.000935241	ENSG00000131943	C19orf12	ENSG00000131943	C19orf12
ENSDARG00000057855	mrps31	81.8299	1.61576	3.06472	0.326294	0.252075	6.40984	1.45675e-10	7.20135e-09	ENSG00000102738	MRPS31	ENSG00000102738	MRPS31
ENSDARG00000078259	bnip1a	3.13295	1.61552	3.06423	0.326346	0.628951	2.5686	0.0102109	0.0360613	ENSG00000113734	BNIP1	ENSG00000113734	BNIP1
ENSDARG00000075203	zgc:195212	6.85278	1.61522	3.06358	0.326416	0.543959	2.96937	0.00298406	0.0130647	ENSG00000173715	C11orf80	ENSG00000173715	C11orf80
ENSDARG00000001249	pcgf1	32.0332	1.61448	3.06201	0.326583	0.458582	3.52058	0.000430601	0.00257925	ENSG00000115289	PCGF1	ENSG00000115289	PCGF1
ENSDARG00000099429	mrps15	68.0025	1.61186	3.05647	0.327175	0.241596	6.67173	2.52798e-11	1.55839e-09	ENSG00000116898	MRPS15	ENSG00000116898	MRPS15
ENSDARG00000097264	si:ch211-40k21.5	48.3567	1.61109	3.05482	0.327352	0.600776	2.68167	0.00732549	0.0275227
ENSDARG00000055160	chadla	3.18101	1.61075	3.0541	0.327429	0.669658	2.40533	0.016158	0.0523346	ENSG00000100399	CHADL	ENSG00000100399	CHADL
ENSDARG00000105002	FP103009.1	5.03444	1.61041	3.05338	0.327506	0.689686	2.33498	0.0195443	0.0612344
ENSDARG00000016516	rbm8a	200.049	1.61012	3.05278	0.32757	0.215695	7.46481	8.34188e-14	1.0732e-11	ENSG00000265241	RBM8A	ENSG00000265241	RBM8A
ENSDARG00000058287	gpalpp1	25.6806	1.60963	3.05173	0.327683	0.282799	5.69178	1.25723e-08	3.32581e-07	ENSG00000133114	GPALPP1	ENSG00000133114	GPALPP1
ENSDARG00000009267	zgc:136439	39.1082	1.60884	3.05007	0.327862	0.375147	4.28856	1.79832e-05	0.000172618
ENSDARG00000100944	glrx2	12.5523	1.60825	3.04882	0.327995	0.305109	5.27108	1.35625e-07	2.5987e-06	ENSG00000023572	GLRX2	ENSG00000023572	GLRX2
ENSDARG00000007130	mrto4	71.899	1.60767	3.04759	0.328128	0.316912	5.07292	3.91748e-07	6.45527e-06	ENSG00000053372	MRTO4	ENSG00000053372	MRTO4
ENSDARG00000041921	hsbp1b	62.3193	1.60642	3.04495	0.328413	0.315992	5.08373	3.70092e-07	6.16711e-06	ENSG00000230989	HSBP1	ENSG00000230989	HSBP1
ENSDARG00000079074	frmpd1a	12.802	1.60639	3.0449	0.328418	0.47648	3.37137	0.000747943	0.00411806	ENSG00000070601	FRMPD1	ENSG00000070601	FRMPD1
ENSDARG00000039390	sdhaf4	14.4287	1.60611	3.04431	0.328482	0.381816	4.20651	2.59339e-05	0.000237843	ENSG00000154079	SDHAF4	ENSG00000154079	SDHAF4
ENSDARG00000062971	sdhaf2	92.177	1.60438	3.04064	0.328878	0.222258	7.21853	5.25523e-13	5.64928e-11	ENSG00000256591	AP003108.2
ENSDARG00000102822	pam16	63.5609	1.60408	3.04002	0.328945	0.237727	6.74759	1.50317e-11	9.88419e-10
ENSDARG00000076609	si:ch211-199g17.9	27.5892	1.60165	3.03491	0.329499	0.599894	2.66989	0.00758751	0.0283324
ENSDARG00000015064	esrrd	3.33158	1.60127	3.0341	0.329587	0.732528	2.18595	0.0288194	0.084194
ENSDARG00000021974	sfr1	39.8396	1.60018	3.0318	0.329837	0.557935	2.86803	0.00413032	0.0171308	ENSG00000156384	SFR1	ENSG00000156384	SFR1
ENSDARG00000037276	map9	26.6018	1.59875	3.02881	0.330163	0.359053	4.45269	8.48012e-06	9.05872e-05	ENSG00000164114	MAP9	ENSG00000164114	MAP9
ENSDARG00000043536	si:dkey-86e18.1	18.8985	1.59873	3.02876	0.330168	0.459833	3.47676	0.000507508	0.00297285
ENSDARG00000104829	zgc:112146	7.21041	1.59756	3.02631	0.330436	0.585835	2.72698	0.00639179	0.0245993
ENSDARG00000022767	apobb.1	37894.5	1.59737	3.02591	0.330479	0.487346	3.27769	0.00104661	0.00544839	ENSG00000084674	APOB	ENSG00000084674	APOB
ENSDARG00000092473	apopt1	46.5968	1.59691	3.02496	0.330583	0.274209	5.82371	5.75557e-09	1.67437e-07	ENSG00000256053	APOPT1	ENSG00000256053	APOPT1
ENSDARG00000069093	col2a1a	315.555	1.59612	3.02329	0.330766	0.542464	2.94235	0.00325731	0.0140122	ENSG00000139219	COL2A1	ENSG00000139219	COL2A1
ENSDARG00000010186	myo3a	14.1279	1.59484	3.0206	0.33106	0.624077	2.55551	0.0106032	0.0372182	ENSG00000095777	MYO3A	ENSG00000095777	MYO3A
ENSDARG00000058414	bglap	21.471	1.59357	3.01796	0.33135	0.709817	2.24505	0.0247649	0.0743845
ENSDARG00000088052	CR759791.1	9.41624	1.5916	3.01384	0.331803	0.581873	2.73531	0.00623217	0.0241059
ENSDARG00000074071	zgc:123335	28.0927	1.59115	3.0129	0.331907	0.515382	3.08732	0.00201969	0.00943537	ENSG00000161010	MRNIP	ENSG00000161010	MRNIP
ENSDARG00000088048	fgf18a	9.05205	1.59083	3.01223	0.33198	0.616069	2.58223	0.00981647	0.0348761	ENSG00000156427	FGF18	ENSG00000156427	FGF18
ENSDARG00000059279	tfap2a	25.8831	1.59036	3.01125	0.332088	0.752846	2.11247	0.0346466	0.0974021	ENSG00000137203	TFAP2A	ENSG00000137203	TFAP2A
ENSDARG00000044092	atpif1b	135.129	1.58775	3.00581	0.332689	0.252223	6.29504	3.0732e-10	1.40209e-08	ENSG00000130770	ATPIF1	ENSG00000130770	ATPIF1
ENSDARG00000005791	rpl28	1076.71	1.58611	3.0024	0.333067	0.224599	7.06199	1.6413e-12	1.54528e-10	ENSG00000108107	RPL28	ENSG00000108107	RPL28
ENSDARG00000031511	psmb2	187.452	1.58553	3.00118	0.333202	0.217894	7.2766	3.42336e-13	3.79096e-11	ENSG00000126067	PSMB2	ENSG00000126067	PSMB2
ENSDARG00000091660	fgfbp1b	5.23291	1.58533	3.00076	0.333249	0.719767	2.20256	0.0276258	0.0814888	ENSG00000137440	FGFBP1	ENSG00000137440	FGFBP1
ENSDARG00000092889		13.7276	1.58526	3.00062	0.333264	0.344746	4.59834	4.25874e-06	5.00064e-05	ENSG00000217442	SYCE3	ENSG00000217442	SYCE3
ENSDARG00000058328	lsm7	65.9063	1.58438	2.99879	0.333468	0.257062	6.16343	7.11868e-10	2.85754e-08	ENSG00000130332	LSM7	ENSG00000130332	LSM7
ENSDARG00000075621	birc5a	62.5339	1.58332	2.99659	0.333712	0.557666	2.8392	0.00452273	0.0184845	ENSG00000089685	BIRC5	ENSG00000089685	BIRC5
ENSDARG00000061527	nxt2	43.0241	1.58219	2.99424	0.333975	0.365709	4.32636	1.51595e-05	0.000148603	ENSG00000101888	NXT2
ENSDARG00000103093	alg14	16.6619	1.58172	2.99327	0.334083	0.277553	5.69881	1.20645e-08	3.20786e-07	ENSG00000172339	ALG14	ENSG00000172339	ALG14
ENSDARG00000075730	dnph1	13.5736	1.5816	2.99302	0.334111	0.450091	3.51396	0.000441479	0.0026345	ENSG00000112667	DNPH1	ENSG00000112667	DNPH1
ENSDARG00000104807	si:ch73-221f6.3	24.4449	1.58084	2.99144	0.334287	0.373227	4.2356	2.27942e-05	0.000212336
ENSDARG00000003326	cacng5a	1.82861	1.57827	2.98612	0.334883	0.666926	2.36648	0.0179579	0.0572955	ENSG00000075429	CACNG5	ENSG00000075429	CACNG5
ENSDARG00000097753	slirp	42.1733	1.57785	2.98525	0.33498	0.319341	4.94097	7.7736e-07	1.16005e-05	ENSG00000119705	SLIRP	ENSG00000119705	SLIRP
ENSDARG00000097453	si:ch211-225b7.5	1.90055	1.57746	2.98444	0.335071	0.682253	2.31213	0.0207704	0.0643747
ENSDARG00000068892	sostdc1a	18.1044	1.57698	2.98344	0.335183	0.484264	3.25645	0.00112815	0.00581467	ENSG00000171243	SOSTDC1	ENSG00000171243	SOSTDC1
ENSDARG00000071733	si:ch211-207i20.3	38.6825	1.57615	2.98173	0.335376	0.515398	3.05812	0.00222732	0.0102135
ENSDARG00000039174	olfm3b	5.12153	1.57494	2.97924	0.335656	0.565163	2.78671	0.00532465	0.0211746	ENSG00000118733	OLFM3	ENSG00000118733	OLFM3
ENSDARG00000027867	paplna	35.3099	1.57253	2.97425	0.336219	0.458353	3.43082	0.000601757	0.00343177	ENSG00000100767	PAPLN	ENSG00000100767	PAPLN
ENSDARG00000033949	fbxo16	7.65765	1.57246	2.97411	0.336235	0.689456	2.28072	0.0225647	0.0688746	ENSG00000214050	FBXO16	ENSG00000214050	FBXO16
ENSDARG00000011272	uqcc2	52.0462	1.57119	2.97149	0.336532	0.231759	6.77939	1.20683e-11	8.19899e-10	ENSG00000137288	UQCC2	ENSG00000137288	UQCC2
ENSDARG00000023645	ccbl1	65.5152	1.57097	2.97105	0.336581	0.497668	3.15667	0.00159582	0.00775738	ENSG00000171097	KYAT1	ENSG00000171097	KYAT1
ENSDARG00000079416	zgc:174895	21.255	1.57073	2.97054	0.336639	0.498419	3.15141	0.00162482	0.00786697
ENSDARG00000077115	si:ch73-44m9.1	11.1151	1.56974	2.96851	0.336869	0.593206	2.6462	0.00814021	0.0300121
ENSDARG00000053517	EML5	12.197	1.56921	2.96742	0.336993	0.636692	2.46463	0.0137155	0.0457988	ENSG00000165521	EML5	ENSG00000165521	EML5
ENSDARG00000105345	zgc:173552	2.88996	1.56638	2.9616	0.337656	0.622522	2.51618	0.0118636	0.040758
ENSDARG00000100626	CABZ01080599.1	3.51413	1.56597	2.96076	0.337751	0.672967	2.32696	0.0199673	0.0622958
ENSDARG00000044626	ccdc90b	16.3793	1.56578	2.96037	0.337796	0.429409	3.64635	0.000265989	0.00172277	ENSG00000137500	CCDC90B	ENSG00000137500	CCDC90B
ENSDARG00000079946	sqlea	215.913	1.56552	2.95985	0.337855	0.480198	3.26016	0.00111348	0.00574864	ENSG00000104549	SQLE	ENSG00000104549	SQLE
ENSDARG00000101679	cfap52	94.2828	1.56502	2.95882	0.337973	0.741373	2.11098	0.0347742	0.0976839	ENSG00000166596	CFAP52	ENSG00000166596	CFAP52
ENSDARG00000035438	myhc4	29381.7	1.56477	2.95831	0.338031	0.695096	2.25116	0.0243752	0.0733523	ENSG00000109061	MYH1	ENSG00000109061	MYH1
ENSDARG00000058646	ptprna	21.139	1.56325	2.9552	0.338387	0.534583	2.92425	0.00345287	0.0147008	ENSG00000054356	PTPRN	ENSG00000054356	PTPRN
ENSDARG00000092954	mrpl34	64.947	1.56308	2.95484	0.338428	0.244401	6.39555	1.5997e-10	7.83321e-09	ENSG00000130312	MRPL34	ENSG00000130312	MRPL34
ENSDARG00000040350	rpp38	96.5526	1.56104	2.95066	0.338907	0.416324	3.74957	0.000177138	0.00120892	ENSG00000152464	RPP38	ENSG00000152464	RPP38
ENSDARG00000105451	si:cabz01068815.1	193.768	1.5597	2.94792	0.339222	0.462099	3.37525	0.000737497	0.00406812
ENSDARG00000092228	si:dkey-27p18.3	20.7344	1.5595	2.94752	0.339268	0.467968	3.3325	0.000860703	0.00461979
ENSDARG00000093997	si:dkey-9i23.15	43.4289	1.55763	2.9437	0.339709	0.235038	6.62715	3.42226e-11	2.04871e-09
ENSDARG00000059857	blvra	23.6356	1.55737	2.94316	0.339771	0.282008	5.52243	3.34352e-08	7.63554e-07	ENSG00000106605	BLVRA	ENSG00000106605	BLVRA
ENSDARG00000105412	si:ch211-276i12.11	55.5646	1.55322	2.93472	0.340748	0.274658	5.65513	1.55731e-08	3.97249e-07
ENSDARG00000077861	sowahaa	7.86103	1.55319	2.93465	0.340756	0.449779	3.45322	0.000553932	0.00320312	ENSG00000198944	SOWAHA	ENSG00000198944	SOWAHA
ENSDARG00000101472	pop4	62.1965	1.55293	2.93413	0.340817	0.459154	3.38216	0.000719187	0.00398303	ENSG00000105171	POP4	ENSG00000105171	POP4
ENSDARG00000090871	si:dkey-210j14.4	31.8783	1.55287	2.93401	0.340831	0.489575	3.17188	0.00151457	0.00741112	ENSG00000169740	ZNF32	ENSG00000169740	ZNF32
ENSDARG00000025554	wdr83os	147.027	1.55285	2.93396	0.340836	0.213424	7.27591	3.44083e-13	3.79096e-11	ENSG00000105583	WDR83OS	ENSG00000105583	WDR83OS
ENSDARG00000029995	tnni2b.2	2858.66	1.55009	2.92835	0.341489	0.540839	2.86608	0.00415585	0.0172264	ENSG00000130598	TNNI2	ENSG00000130598	TNNI2
ENSDARG00000103167	si:dkey-245n4.2	2.10562	1.54947	2.9271	0.341635	0.697332	2.222	0.0262833	0.0781405
ENSDARG00000039719	mrps26	87.9691	1.54821	2.92455	0.341933	0.278479	5.55952	2.70511e-08	6.47008e-07	ENSG00000125901	MRPS26	ENSG00000125901	MRPS26
ENSDARG00000098477	tec	79.9562	1.54821	2.92454	0.341934	0.446737	3.46559	0.000529062	0.00307649	ENSG00000135605	TEC	ENSG00000135605	TEC
ENSDARG00000061800	si:dkey-208k22.6	12.6366	1.54805	2.92422	0.341972	0.415917	3.72202	0.000197637	0.00133301
ENSDARG00000075962	vav3b	12.441	1.54801	2.92414	0.34198	0.552223	2.80324	0.00505914	0.0202846	ENSG00000134215	VAV3	ENSG00000134215	VAV3
ENSDARG00000057854	sap18	155.713	1.54765	2.9234	0.342067	0.211811	7.30676	2.73664e-13	3.1145e-11	ENSG00000150459	SAP18	ENSG00000150459	SAP18
ENSDARG00000037628	trpt1	21.7229	1.54667	2.92142	0.3423	0.34721	4.45457	8.4063e-06	8.99159e-05	ENSG00000149743	TRPT1	ENSG00000149743	TRPT1
ENSDARG00000060962	btr04	69.9932	1.54604	2.92015	0.342448	0.326635	4.73325	2.20958e-06	2.86761e-05	ENSG00000223638	RFPL4A
ENSDARG00000101093	zgc:162971	15.6023	1.545	2.91803	0.342697	0.371939	4.15389	3.26866e-05	0.00028958
ENSDARG00000067658	BX470189.1	52.4451	1.54498	2.918	0.3427	0.563476	2.74188	0.00610894	0.0236956
ENSDARG00000013478	rrp15	44.753	1.54378	2.91557	0.342987	0.271903	5.67767	1.3654e-08	3.56312e-07	ENSG00000067533	RRP15	ENSG00000067533	RRP15
ENSDARG00000061377	efcab1	26.9771	1.54354	2.91509	0.343042	0.568892	2.71324	0.00666284	0.025472	ENSG00000034239	EFCAB1	ENSG00000034239	EFCAB1
ENSDARG00000038956	fdx1b	5.13683	1.54349	2.91498	0.343055	0.421271	3.66388	0.000248427	0.00162683
ENSDARG00000010482	prg4a	5.69067	1.54326	2.91453	0.343109	0.570133	2.70685	0.00679256	0.025882	ENSG00000116690	PRG4	ENSG00000116690	PRG4
ENSDARG00000015394	thoc7	68.0854	1.54225	2.91249	0.343349	0.306839	5.02625	5.0016e-07	7.94464e-06	ENSG00000163634	THOC7	ENSG00000163634	THOC7
ENSDARG00000088619	rexo4	85.2674	1.54031	2.90857	0.343811	0.33307	4.62458	3.75352e-06	4.5149e-05	ENSG00000148300	REXO4	ENSG00000148300	REXO4
ENSDARG00000026895	tor1l3	24.8904	1.53922	2.90637	0.344071	0.416051	3.6996	0.000215944	0.00143821	ENSG00000136816	TOR1B
ENSDARG00000035333	mis18a	26.1358	1.53902	2.90597	0.344119	0.469106	3.28075	0.0010353	0.00539611	ENSG00000159055	MIS18A	ENSG00000159055	MIS18A
ENSDARG00000071036	si:dkey-286j15.3	98.3467	1.53867	2.90527	0.344202	0.256763	5.99258	2.06542e-09	7.06677e-08
ENSDARG00000032725	rps27a	2167.87	1.53866	2.90524	0.344206	0.245851	6.2585	3.8869e-10	1.68078e-08	ENSG00000143947	RPS27A	ENSG00000143947	RPS27A
ENSDARG00000053021	grsf1	60.6664	1.53863	2.90518	0.344212	0.252138	6.10234	1.04526e-09	4.00935e-08	ENSG00000132463	GRSF1	ENSG00000132463	GRSF1
ENSDARG00000058548	bves	36.5982	1.53676	2.90143	0.344657	0.567756	2.70674	0.00679482	0.0258858	ENSG00000112276	BVES	ENSG00000112276	BVES
ENSDARG00000040747	tm4sf4	2041.43	1.53402	2.89592	0.345313	0.637719	2.40549	0.016151	0.0523203	ENSG00000169903	TM4SF4	ENSG00000169903	TM4SF4
ENSDARG00000087331	si:dkey-77f5.3	32.9148	1.53374	2.89536	0.34538	0.337187	4.54864	5.39934e-06	6.15162e-05
ENSDARG00000036776	aldh8a1	88.9786	1.53329	2.89445	0.345488	0.309461	4.95471	7.24375e-07	1.0912e-05	ENSG00000118514	ALDH8A1	ENSG00000118514	ALDH8A1
ENSDARG00000074867	stim2a	29.0481	1.53268	2.89323	0.345634	0.607273	2.52388	0.0116068	0.0400887	ENSG00000109689	STIM2	ENSG00000109689	STIM2
ENSDARG00000060126	acyp1	10.2489	1.53263	2.89313	0.345646	0.387986	3.95023	7.80761e-05	0.000603204
ENSDARG00000043666	abt1	66.3747	1.5319	2.89166	0.345822	0.275897	5.55243	2.81732e-08	6.66917e-07	ENSG00000146109	ABT1	ENSG00000146109	ABT1
ENSDARG00000092387	zgc:193742	12.3022	1.53179	2.89144	0.345848	0.398919	3.83985	0.000123111	0.000890363
ENSDARG00000075274	TEAD4	34.5982	1.53165	2.89117	0.345881	0.526096	2.91135	0.00359869	0.0152339	ENSG00000197905	TEAD4	ENSG00000197905	TEAD4
ENSDARG00000010478	hsp90aa1.1	418.691	1.52994	2.88773	0.346292	0.474973	3.2211	0.00127699	0.00644238
ENSDARG00000105344	pkd1l2a	3.19819	1.5298	2.88746	0.346325	0.697016	2.19479	0.028179	0.0827902
ENSDARG00000052396	pkz	35.1134	1.52972	2.8873	0.346344	0.594229	2.5743	0.0100444	0.0355399	ENSG00000055332	EIF2AK2	ENSG00000055332	EIF2AK2
ENSDARG00000052840	ndufs4	90.7082	1.52932	2.8865	0.346441	0.253103	6.04227	1.51959e-09	5.47394e-08	ENSG00000164258	NDUFS4	ENSG00000164258	NDUFS4
ENSDARG00000036092	sdhaf3	20.7186	1.52925	2.88636	0.346458	0.320614	4.76975	1.84457e-06	2.45544e-05	ENSG00000196636	SDHAF3	ENSG00000196636	SDHAF3
ENSDARG00000061249	myom1a	1301.9	1.52783	2.88352	0.346799	0.331162	4.61355	3.95855e-06	4.72041e-05	ENSG00000101605	MYOM1	ENSG00000101605	MYOM1
ENSDARG00000092726	si:dkey-184p9.7	4.37205	1.52764	2.88313	0.346845	0.718266	2.12684	0.0334334	0.0946694
ENSDARG00000103908	CABZ01084963.1	147.934	1.52759	2.88305	0.346855	0.225945	6.76091	1.37126e-11	9.13273e-10	ENSG00000091483	FH	ENSG00000091483	FH
ENSDARG00000006615	hnf1ba	91.7658	1.52687	2.88159	0.34703	0.521372	2.92855	0.00340546	0.0145528	ENSG00000275410	HNF1B	ENSG00000275410	HNF1B
ENSDARG00000002967	pdap1b	62.3454	1.52657	2.881	0.347102	0.262907	5.80649	6.37956e-09	1.83783e-07	ENSG00000106244	PDAP1	ENSG00000106244	PDAP1
ENSDARG00000068940	atp5ib	304.337	1.52537	2.8786	0.347391	0.25183	6.05714	1.38563e-09	5.06183e-08	ENSG00000169020	ATP5I	ENSG00000169020	ATP5I
ENSDARG00000091702	csnk2a4	16.2343	1.52511	2.87809	0.347453	0.330383	4.61619	3.90853e-06	4.67421e-05	ENSG00000254598	CSNK2A3
ENSDARG00000105012	utp23	57.8749	1.52458	2.87704	0.34758	0.281708	5.41193	6.23491e-08	1.31914e-06	ENSG00000147679	UTP23	ENSG00000147679	UTP23
ENSDARG00000059246	hnrnpd	137.077	1.52251	2.87291	0.348079	0.25598	5.94779	2.7179e-09	8.90756e-08	ENSG00000138668	HNRNPD	ENSG00000138668	HNRNPD
ENSDARG00000032630	neb	6882.41	1.52238	2.87264	0.348112	0.423751	3.59262	0.000327371	0.00204983	ENSG00000183091	NEB	ENSG00000183091	NEB
ENSDARG00000104031	mrpl33	38.1725	1.52153	2.87096	0.348315	0.27313	5.57073	2.53675e-08	6.13111e-07	ENSG00000243147	MRPL33	ENSG00000243147	MRPL33
ENSDARG00000092546	pdap1a	272.269	1.52114	2.87018	0.34841	0.247838	6.13766	8.37463e-10	3.30407e-08
ENSDARG00000035549	uprt	76.7972	1.52075	2.86941	0.348504	0.236758	6.42324	1.33408e-10	6.65848e-09	ENSG00000094841	UPRT	ENSG00000094841	UPRT
ENSDARG00000073962	ccdc32	43.9002	1.51921	2.86633	0.348878	0.201462	7.54091	4.6672e-14	6.4021e-12	ENSG00000128891	CCDC32	ENSG00000128891	CCDC32
ENSDARG00000007989	nedd8	69.3881	1.51901	2.86595	0.348924	0.235032	6.46301	1.02643e-10	5.24947e-09	ENSG00000129559	NEDD8	ENSG00000129559	NEDD8
ENSDARG00000091428		27.6995	1.51864	2.86521	0.349014	0.721073	2.10609	0.0351966	0.0985331	ENSG00000137478	FCHSD2	ENSG00000137478	FCHSD2
ENSDARG00000101481	rbp5	34.5064	1.51849	2.86491	0.349051	0.416646	3.64456	0.000267852	0.00173321	ENSG00000139194	RBP5	ENSG00000139194	RBP5
ENSDARG00000012603	eif3ja	170.35	1.51768	2.86329	0.349248	0.239828	6.3282	2.48045e-10	1.16239e-08	ENSG00000104131	EIF3J	ENSG00000104131	EIF3J
ENSDARG00000042988	slc24a2	43.1948	1.5173	2.86256	0.349338	0.681836	2.22532	0.0260596	0.0775981	ENSG00000155886	SLC24A2	ENSG00000155886	SLC24A2
ENSDARG00000101848	dydc2	27.8633	1.51719	2.86234	0.349365	0.542269	2.79786	0.00514424	0.0205688
ENSDARG00000007418	chmp4c	58.2982	1.51703	2.86201	0.349405	0.339139	4.47317	7.70669e-06	8.35752e-05	ENSG00000164695	CHMP4C	ENSG00000164695	CHMP4C
ENSDARG00000102317	rpl26	2228.36	1.51643	2.86081	0.349551	0.216678	6.99852	2.58683e-12	2.26446e-10	ENSG00000263809	AC135178.2
ENSDARG00000096257	si:ch73-367p23.2	8865.94	1.51631	2.86059	0.349578	0.51305	2.95549	0.00312176	0.0135444
ENSDARG00000042851	srp9	43.0213	1.51597	2.85992	0.34966	0.298382	5.08065	3.76144e-07	6.24786e-06	ENSG00000143742	SRP9	ENSG00000143742	SRP9
ENSDARG00000033683	tpma	21047	1.51507	2.85812	0.34988	0.474697	3.19165	0.00141463	0.00700021
ENSDARG00000057741	nr1h4	32.0888	1.51471	2.85742	0.349966	0.594083	2.54967	0.0107826	0.0377711	ENSG00000012504	NR1H4	ENSG00000012504	NR1H4
ENSDARG00000105036	arl6ip4	41.2709	1.51417	2.85634	0.350098	0.279289	5.42151	5.9098e-08	1.26456e-06	ENSG00000182196	ARL6IP4	ENSG00000182196	ARL6IP4
ENSDARG00000034677	scel	21.2496	1.51383	2.85568	0.350179	0.707775	2.13886	0.0324467	0.0925078	ENSG00000136155	SCEL	ENSG00000136155	SCEL
ENSDARG00000089951	si:dkey-210j14.5	14.1476	1.5122	2.85244	0.350577	0.345919	4.37153	1.23377e-05	0.000124598
ENSDARG00000102531	anapc11	26.5196	1.51187	2.8518	0.350656	0.303573	4.98026	6.34978e-07	9.72807e-06	ENSG00000141552	ANAPC11	ENSG00000141552	ANAPC11
ENSDARG00000040565	ckmb	12406.9	1.51153	2.85112	0.350739	0.524036	2.8844	0.00392158	0.0163865	ENSG00000104879	CKM	ENSG00000104879	CKM
ENSDARG00000029445	EIF1B	361.148	1.51071	2.8495	0.350938	0.345889	4.36762	1.25607e-05	0.000126358	ENSG00000114784	EIF1B	ENSG00000114784	EIF1B
ENSDARG00000076485		62.7868	1.51066	2.8494	0.350952	0.6565	2.30108	0.0213874	0.065981	ENSG00000138347	MYPN	ENSG00000138347	MYPN
ENSDARG00000046012	slc47a1	101.536	1.5099	2.84791	0.351135	0.606349	2.49016	0.0127687	0.043279	ENSG00000142494	SLC47A1
ENSDARG00000056519	si:dkey-280e21.3	10.8332	1.50883	2.84578	0.351397	0.499906	3.01822	0.00254266	0.0114392
ENSDARG00000014731	cacybp	73.3904	1.50853	2.84519	0.35147	0.255355	5.90756	3.47214e-09	1.10985e-07	ENSG00000116161	CACYBP	ENSG00000116161	CACYBP
ENSDARG00000074581	add2	38.0087	1.50757	2.84331	0.351703	0.47238	3.19144	0.00141566	0.00700324	ENSG00000075340	ADD2	ENSG00000075340	ADD2
ENSDARG00000099917	znf1005	9.06425	1.50701	2.84221	0.351839	0.304707	4.94578	7.58382e-07	1.13829e-05
ENSDARG00000038360	thg1l	28.1499	1.50534	2.83892	0.352247	0.362414	4.15366	3.27203e-05	0.000289755	ENSG00000113272	THG1L	ENSG00000113272	THG1L
ENSDARG00000069850	mrpl30	92.414	1.50531	2.83886	0.352254	0.220534	6.82576	8.74587e-12	6.26827e-10	ENSG00000241962	AC079447.1
ENSDARG00000092934	si:dkey-32e6.3	7.51986	1.50255	2.83344	0.352928	0.54905	2.73664	0.00620694	0.0240276
ENSDARG00000102820	cib2	6.75761	1.5025	2.83334	0.35294	0.552241	2.72074	0.00651359	0.0249891	ENSG00000136425	CIB2	ENSG00000136425	CIB2
ENSDARG00000020741	fga	2411.44	1.50217	2.83269	0.353022	0.706886	2.12505	0.0335822	0.0949867	ENSG00000171560	FGA	ENSG00000171560	FGA
ENSDARG00000091931	gpatch4	117.899	1.5021	2.83254	0.35304	0.299065	5.02265	5.09626e-07	8.07025e-06	ENSG00000160818	GPATCH4	ENSG00000160818	GPATCH4
ENSDARG00000056270	atpaf2	70.2482	1.50183	2.83202	0.353105	0.32239	4.65843	3.18623e-06	3.91438e-05	ENSG00000171953	ATPAF2	ENSG00000171953	ATPAF2
ENSDARG00000043301	gtf3c6	35.3707	1.50119	2.83077	0.353261	0.397023	3.78113	0.00015612	0.00108984	ENSG00000155115	GTF3C6	ENSG00000155115	GTF3C6
ENSDARG00000051748	ccnd2a	44.3919	1.50059	2.82958	0.353409	0.318626	4.70957	2.48241e-06	3.15886e-05	ENSG00000118971	CCND2	ENSG00000118971	CCND2
ENSDARG00000076487	haao	204.13	1.49968	2.8278	0.353631	0.61972	2.41994	0.0155232	0.0505888	ENSG00000162882	HAAO	ENSG00000162882	HAAO
ENSDARG00000074588	METTL18	23.5808	1.49872	2.82592	0.353867	0.329132	4.55356	5.27449e-06	6.02595e-05	ENSG00000171806	METTL18	ENSG00000171806	METTL18
ENSDARG00000004724	tcea3	59.5906	1.49852	2.82552	0.353917	0.321066	4.66733	3.05143e-06	3.77339e-05	ENSG00000204219	TCEA3	ENSG00000204219	TCEA3
ENSDARG00000042534	rsrc2	113.141	1.4985	2.82549	0.353921	0.255648	5.86159	4.58468e-09	1.39651e-07	ENSG00000111011	RSRC2	ENSG00000111011	RSRC2
ENSDARG00000075528	lyrm9	29.1794	1.4981	2.8247	0.35402	0.2766	5.41612	6.09069e-08	1.29259e-06	ENSG00000232859	LYRM9
ENSDARG00000053527	snx24	31.9387	1.49799	2.82448	0.354047	0.282637	5.30004	1.15775e-07	2.25844e-06	ENSG00000064652	SNX24	ENSG00000064652	SNX24
ENSDARG00000077573	tmprss13b	3.2346	1.49776	2.82403	0.354104	0.634846	2.35924	0.0183122	0.0582554	ENSG00000137747	TMPRSS13	ENSG00000137747	TMPRSS13
ENSDARG00000037142	zgc:153146	6.25921	1.49605	2.8207	0.354522	0.503885	2.96904	0.00298734	0.0130735	ENSG00000205129	C4orf47	ENSG00000205129	C4orf47
ENSDARG00000015015	tspan18b	23.002	1.496	2.8206	0.354535	0.341584	4.3796	1.18897e-05	0.00012078	ENSG00000157570	TSPAN18	ENSG00000157570	TSPAN18
ENSDARG00000103743	si:dkeyp-72e1.9	15.5194	1.49599	2.82057	0.354538	0.486467	3.07521	0.00210352	0.00976255
ENSDARG00000010160	rps15a	1226.44	1.4959	2.8204	0.354559	0.247345	6.04783	1.4681e-09	5.32554e-08	ENSG00000134419	RPS15A	ENSG00000134419	RPS15A
ENSDARG00000026484	rab15	7.27146	1.49581	2.82023	0.354581	0.570946	2.61989	0.00879591	0.0319015	ENSG00000139998	RAB15	ENSG00000139998	RAB15
ENSDARG00000017084	bud31	107.628	1.49424	2.81715	0.354969	0.222871	6.70449	2.02113e-11	1.27245e-09	ENSG00000106245	BUD31	ENSG00000106245	BUD31
ENSDARG00000014675	efna3a	6.36201	1.49417	2.81702	0.354985	0.503643	2.96672	0.00300992	0.0131584	ENSG00000251246	AL691442.1
ENSDARG00000019304	phactr3b	8.69199	1.49355	2.81581	0.355137	0.537528	2.77856	0.0054601	0.0216367	ENSG00000087495	PHACTR3	ENSG00000087495	PHACTR3
ENSDARG00000020364	fbp1b	1124.13	1.49234	2.81344	0.355436	0.609579	2.44815	0.0143594	0.0475652
ENSDARG00000042107		6.41328	1.4907	2.81025	0.355841	0.660857	2.2557	0.0240894	0.0727333	ENSG00000070729	CNGB1	ENSG00000070729	CNGB1
ENSDARG00000059855	wdr66	86.7914	1.4906	2.81005	0.355865	0.421913	3.53295	0.000410949	0.0024773	ENSG00000158023	WDR66	ENSG00000158023	WDR66
ENSDARG00000087471	CABZ01072827.1	3.52727	1.48783	2.80468	0.356547	0.656812	2.26524	0.0234982	0.0712721	ENSG00000197774	EME2	ENSG00000197774	EME2
ENSDARG00000070484	zgc:195001	67.5196	1.48766	2.80434	0.35659	0.541828	2.74564	0.00603939	0.0234715
ENSDARG00000012899	ddx4	420.986	-2.86452	0.137307	7.28296	0.325378	4.57095	4.85509e-06	5.6118e-05	ENSG00000105671	DDX49	ENSG00000105671	DDX49
ENSDARG00000054606	mrpl1	29.6986	1.48728	2.80359	0.356685	0.249163	5.96908	2.386e-09	7.98403e-08	ENSG00000169288	MRPL1	ENSG00000169288	MRPL1
ENSDARG00000094892	cenph	14.0163	1.48721	2.80346	0.356702	0.390076	3.81261	0.000137507	0.000977075	ENSG00000153044	CENPH	ENSG00000153044	CENPH
ENSDARG00000078814	si:dkey-34m19.3	55.1916	1.48692	2.8029	0.356774	0.309656	4.80184	1.57212e-06	2.15082e-05
ENSDARG00000053047	eif2s2	443.072	1.48605	2.8012	0.356989	0.185555	8.00867	1.15959e-15	2.54236e-13	ENSG00000125977	EIF2S2	ENSG00000125977	EIF2S2
ENSDARG00000074765	mhc1zja	17.4298	1.48528	2.79971	0.35718	0.350902	4.23274	2.30859e-05	0.000214784	ENSG00000104870	FCGRT
ENSDARG00000061956	sytl2a	19.9642	1.48402	2.79727	0.357491	0.565247	2.62544	0.00865373	0.0314906	ENSG00000137501	SYTL2	ENSG00000137501	SYTL2
ENSDARG00000032272	sat1b	15.4532	1.48369	2.79664	0.357572	0.414925	3.57581	0.000349144	0.00216198	ENSG00000130066	SAT1	ENSG00000130066	SAT1
ENSDARG00000074628	si:dkey-10o6.2	21.6312	1.48324	2.79577	0.357684	0.539985	2.74683	0.00601751	0.0234067
ENSDARG00000053201	zgc:172323	82.8424	1.48266	2.79463	0.357829	0.38752	3.82602	0.000130233	0.000934364
ENSDARG00000103207	rab11fip4b	29.7355	1.48247	2.79428	0.357874	0.371484	3.99068	6.58838e-05	0.00052102	ENSG00000131242	RAB11FIP4	ENSG00000131242	RAB11FIP4
ENSDARG00000058140	ttc25	38.3031	1.48232	2.79397	0.357913	0.581745	2.54805	0.0108326	0.0379013	ENSG00000204815	TTC25	ENSG00000204815	TTC25
ENSDARG00000075677	mrpl17	72.657	1.48193	2.79321	0.35801	0.271636	5.45555	4.88212e-08	1.07122e-06	ENSG00000158042	MRPL17	ENSG00000158042	MRPL17
ENSDARG00000076283	snrpd3l	62.0638	1.48134	2.79209	0.358155	0.260365	5.68948	1.27426e-08	3.35372e-07	ENSG00000100028	SNRPD3	ENSG00000100028	SNRPD3
ENSDARG00000078333	tmem234	12.0108	1.48054	2.79053	0.358355	0.336949	4.39396	1.11304e-05	0.000114187	ENSG00000160055	TMEM234	ENSG00000160055	TMEM234
ENSDARG00000076534	si:ch211-14a17.10	191.157	1.47996	2.78941	0.358499	0.425424	3.47879	0.000503686	0.00295465
ENSDARG00000005595	adgb	61.0012	1.47896	2.78748	0.358746	0.437198	3.38282	0.000717449	0.00397446	ENSG00000118492	ADGB	ENSG00000118492	ADGB
ENSDARG00000045360	flj11011l	52.6752	1.47859	2.78676	0.35884	0.258585	5.71799	1.07792e-08	2.91475e-07	ENSG00000258677	AC022826.2
ENSDARG00000091124	rps19bp1	86.2294	1.47779	2.78521	0.359039	0.224475	6.5833	4.6013e-11	2.64694e-09	ENSG00000187051	RPS19BP1	ENSG00000187051	RPS19BP1
ENSDARG00000024815	ogfrl2	55.0342	1.4776	2.78485	0.359086	0.406309	3.63663	0.000276224	0.00177684	ENSG00000060491	OGFR	ENSG00000060491	OGFR
ENSDARG00000069978	si:ch211-67e16.2	9.29913	1.47741	2.78448	0.359133	0.54876	2.69227	0.0070968	0.0268146
ENSDARG00000070835	tnnc2	9010.86	1.4771	2.78388	0.359211	0.411881	3.58621	0.000335513	0.00209133	ENSG00000101470	TNNC2	ENSG00000101470	TNNC2
ENSDARG00000044332	zranb2	80.298	1.47682	2.78335	0.359279	0.236429	6.24638	4.20069e-10	1.79651e-08	ENSG00000132485	ZRANB2	ENSG00000132485	ZRANB2
ENSDARG00000079236	si:dkey-253d23.11	7.86619	1.47633	2.78239	0.359403	0.502739	2.93657	0.00331868	0.0142378
ENSDARG00000027357	cd2bp2	110.857	1.47629	2.78232	0.359412	0.277656	5.31698	1.05503e-07	2.0852e-06	ENSG00000169217	CD2BP2	ENSG00000169217	CD2BP2
ENSDARG00000026369	dbi	1297.31	1.47603	2.78183	0.359476	0.233184	6.32992	2.45284e-10	1.15206e-08	ENSG00000155368	DBI	ENSG00000155368	DBI
ENSDARG00000101622	mrps7	66.2372	1.47588	2.78153	0.359515	0.178509	8.26779	1.36465e-16	3.87206e-14	ENSG00000125445	MRPS7	ENSG00000125445	MRPS7
ENSDARG00000096528	CU550716.2	46.695	1.47487	2.77959	0.359765	0.388253	3.79874	0.000145434	0.00102706
ENSDARG00000024189	pnocb	3.81453	1.47428	2.77845	0.359913	0.611065	2.41264	0.0158373	0.0514644	ENSG00000168081	PNOC	ENSG00000168081	PNOC
ENSDARG00000033126	prkrip1	44.5857	1.47396	2.77782	0.359994	0.340906	4.32365	1.5347e-05	0.000150157	ENSG00000128563	PRKRIP1	ENSG00000128563	PRKRIP1
ENSDARG00000033285	gsto2	138.467	1.47371	2.77735	0.360056	0.272297	5.41214	6.22749e-08	1.31892e-06	ENSG00000065621	GSTO2
ENSDARG00000027200	gabarapl2	67.3662	1.4733	2.77657	0.360157	0.213579	6.89817	5.26782e-12	4.11745e-10	ENSG00000034713	GABARAPL2	ENSG00000034713	GABARAPL2
ENSDARG00000101766	ptmab	449.927	1.47247	2.77497	0.360365	0.263497	5.58818	2.29463e-08	5.62469e-07
ENSDARG00000030106	stmn4	29.1896	1.47232	2.77468	0.360402	0.350355	4.20237	2.64137e-05	0.000241655	ENSG00000015592	STMN4	ENSG00000015592	STMN4
ENSDARG00000007697	fabp7a	176.186	1.4723	2.77464	0.360407	0.580872	2.53464	0.0112563	0.0391393	ENSG00000164434	FABP7	ENSG00000164434	FABP7
ENSDARG00000091860	zgc:194007	2.05397	1.47173	2.77353	0.360551	0.581466	2.53106	0.0113718	0.0394282
ENSDARG00000015314	zc4h2	82.0589	1.47166	2.77342	0.360566	0.213366	6.89736	5.29768e-12	4.12522e-10	ENSG00000126970	ZC4H2	ENSG00000126970	ZC4H2
ENSDARG00000053318	lrrc6	18.6269	1.47079	2.77174	0.360784	0.373998	3.93263	8.40226e-05	0.000642437	ENSG00000129295	LRRC6	ENSG00000129295	LRRC6
ENSDARG00000094258	commd9	33.3452	1.47023	2.77066	0.360925	0.277157	5.30469	1.12864e-07	2.2096e-06	ENSG00000110442	COMMD9	ENSG00000110442	COMMD9
ENSDARG00000062476	snapc5	22.2551	1.46985	2.76993	0.36102	0.323363	4.54551	5.48021e-06	6.22664e-05	ENSG00000174446	SNAPC5	ENSG00000174446	SNAPC5
ENSDARG00000031981	pcbd1	66.7765	1.46967	2.76959	0.361064	0.216957	6.77404	1.25238e-11	8.42227e-10	ENSG00000166228	PCBD1	ENSG00000166228	PCBD1
ENSDARG00000103740	fundc2	69.5512	1.46961	2.76947	0.36108	0.249295	5.89506	3.74555e-09	1.18265e-07	ENSG00000165775	FUNDC2	ENSG00000165775	FUNDC2
ENSDARG00000099582	CABZ01074276.1	11.8395	1.46519	2.761	0.362188	0.350644	4.17857	2.93351e-05	0.000264067
ENSDARG00000029107	ube2d1a	50.5084	1.46427	2.75924	0.362419	0.305662	4.79049	1.66376e-06	2.25829e-05
ENSDARG00000102512	kdm8	20.4405	1.46416	2.75903	0.362446	0.244783	5.98147	2.2113e-09	7.50865e-08	ENSG00000155666	KDM8	ENSG00000155666	KDM8
ENSDARG00000068344	mmab	18.519	1.46394	2.7586	0.362503	0.331939	4.41026	1.03248e-05	0.000107197	ENSG00000139428	MMAB	ENSG00000139428	MMAB
ENSDARG00000079802	aanat2	2.64897	1.46366	2.75806	0.362573	0.622442	2.35147	0.0186992	0.0591503	ENSG00000129673	AANAT	ENSG00000129673	AANAT
ENSDARG00000031495	seta	623.188	1.46335	2.75748	0.362651	0.186162	7.86064	3.82182e-15	7.00543e-13	ENSG00000119335	SET
ENSDARG00000020136	ptges	9.39045	1.46327	2.75733	0.362669	0.519776	2.8152	0.00487462	0.0196627	ENSG00000148344	PTGES	ENSG00000148344	PTGES
ENSDARG00000071626	ptgdsb.2	300.309	1.46262	2.75608	0.362835	0.486018	3.00939	0.00261776	0.0117138	ENSG00000177984	LCN15
ENSDARG00000059128	uqcrh	183.515	1.46246	2.75577	0.362874	0.237939	6.14636	7.92823e-10	3.14593e-08	ENSG00000233954	UQCRHL
ENSDARG00000103677	CABZ01008730.1	3.1659	1.46212	2.75512	0.36296	0.6681	2.18847	0.0286355	0.0837474	ENSG00000060491	OGFR	ENSG00000060491	OGFR
ENSDARG00000061481	wu:fj05g07	20.317	1.46187	2.75465	0.363023	0.638379	2.28997	0.0220232	0.0675802
ENSDARG00000097546	si:ch211-40k21.9	10.1303	1.46092	2.75283	0.363262	0.427919	3.414	0.000640169	0.00361303	ENSG00000161277	THAP8
ENSDARG00000092998	si:ch211-202f5.3	99.7633	1.4598	2.7507	0.363544	0.215163	6.78463	1.16382e-11	7.95582e-10
ENSDARG00000039892	gnpnat1	77.1472	1.45951	2.75015	0.363616	0.260553	5.60159	2.12394e-08	5.24978e-07	ENSG00000100522	GNPNAT1	ENSG00000100522	GNPNAT1
ENSDARG00000030340	guk1a	28.703	1.45928	2.74971	0.363675	0.371262	3.93059	8.47392e-05	0.00064696	ENSG00000143774	GUK1	ENSG00000143774	GUK1
ENSDARG00000090013	si:dkey-248g15.2	16.1958	1.45918	2.74952	0.3637	0.319781	4.56305	5.04147e-06	5.78984e-05	ENSG00000188549	C15orf52	ENSG00000188549	C15orf52
ENSDARG00000040249	tlr18	16.9792	1.45772	2.74673	0.364069	0.530943	2.74552	0.00604146	0.0234734
ENSDARG00000042660	fam32a	52.0012	1.457	2.74537	0.36425	0.355384	4.0998	4.13514e-05	0.000353201	ENSG00000105058	FAM32A	ENSG00000105058	FAM32A
ENSDARG00000000423	si:ch73-314g15.3	25.1626	1.45604	2.74354	0.364493	0.358633	4.05996	4.90807e-05	0.000406969
ENSDARG00000075269	si:dkey-20i10.7	23.5672	1.45552	2.74255	0.364624	0.459268	3.16922	0.00152851	0.00746876
ENSDARG00000003977	zgc:153896	141.634	1.45545	2.74243	0.364641	0.338758	4.29643	1.7357e-05	0.000167217
ENSDARG00000016724	NKAPD1	40.796	1.45516	2.74186	0.364716	0.34395	4.23072	2.3294e-05	0.000216266	ENSG00000150776	NKAPD1	ENSG00000150776	NKAPD1
ENSDARG00000039424	snrpb2	125.882	1.45508	2.74172	0.364735	0.348055	4.18061	2.90733e-05	0.000262052	ENSG00000125870	SNRPB2	ENSG00000125870	SNRPB2
ENSDARG00000045553	hsd17b2	30.0893	1.45482	2.74122	0.364802	0.54581	2.66543	0.00768906	0.02866	ENSG00000086696	HSD17B2	ENSG00000086696	HSD17B2
ENSDARG00000063145	tfam	51.2516	1.45413	2.73991	0.364975	0.228468	6.36469	1.95684e-10	9.36074e-09	ENSG00000108064	TFAM	ENSG00000108064	TFAM
ENSDARG00000069787	tmc6a	2.56354	1.45364	2.73899	0.365099	0.574842	2.52877	0.0114464	0.0396405	ENSG00000141524	TMC6	ENSG00000141524	TMC6
ENSDARG00000000489	upf3b	98.2408	1.45275	2.7373	0.365324	0.262337	5.53774	3.06407e-08	7.10603e-07	ENSG00000125351	UPF3B	ENSG00000125351	UPF3B
ENSDARG00000053525	enpp7.2	34.0754	1.45266	2.73712	0.365347	0.628801	2.3102	0.0208768	0.0646757	ENSG00000182156	ENPP7	ENSG00000182156	ENPP7
ENSDARG00000097803	si:ch211-275j6.5	32.2355	1.4523	2.73643	0.365439	0.297613	4.87982	1.06181e-06	1.52098e-05	ENSG00000130921	C12orf65	ENSG00000130921	C12orf65
ENSDARG00000018334	rpl35	1020.66	1.45031	2.73266	0.365943	0.254433	5.70015	1.19703e-08	3.19266e-07	ENSG00000136942	RPL35	ENSG00000136942	RPL35
ENSDARG00000035332	c10h21orf59	85.5008	1.44988	2.73185	0.366052	0.248593	5.83235	5.4652e-09	1.61715e-07	ENSG00000265590	AP000275.2
ENSDARG00000100254	zgc:85789	91.0467	1.44964	2.7314	0.366113	0.201969	7.17752	7.09863e-13	7.35169e-11	ENSG00000182919	C11orf54	ENSG00000182919	C11orf54
ENSDARG00000002298	ankrd22	30.8724	1.44954	2.7312	0.366139	0.491726	2.94785	0.0031999	0.0138169	ENSG00000152766	ANKRD22	ENSG00000152766	ANKRD22
ENSDARG00000004318	cbwd	22.7581	1.44945	2.73104	0.366161	0.349496	4.14726	3.36484e-05	0.000296704	ENSG00000215126	CBWD6
ENSDARG00000069832	sfxn4	19.9863	1.44865	2.72953	0.366364	0.346774	4.17751	2.94714e-05	0.000264834	ENSG00000183605	SFXN4	ENSG00000183605	SFXN4
ENSDARG00000074328	apba1b	19.0403	1.44838	2.72902	0.366432	0.451407	3.20859	0.00133387	0.00668162	ENSG00000107282	APBA1	ENSG00000107282	APBA1
ENSDARG00000071573	lsm5	46.4968	1.44687	2.72617	0.366815	0.251101	5.76211	8.30674e-09	2.32196e-07	ENSG00000106355	LSM5	ENSG00000106355	LSM5
ENSDARG00000015236	pycr3	41.7748	1.44671	2.72587	0.366856	0.529695	2.73122	0.00631	0.0243486	ENSG00000104524	PYCR3	ENSG00000104524	PYCR3
ENSDARG00000018006	vrk1	34.6327	1.44584	2.72422	0.367077	0.248082	5.82809	5.60643e-09	1.63789e-07	ENSG00000100749	VRK1	ENSG00000100749	VRK1
ENSDARG00000005525	acy3.2	76.6999	1.44508	2.72279	0.367271	0.541901	2.66669	0.00766022	0.0285679	ENSG00000132744	ACY3	ENSG00000132744	ACY3
ENSDARG00000036754	hmgn3	47.422	1.44456	2.72179	0.367405	0.665227	2.17153	0.0298914	0.0866781	ENSG00000118418	HMGN3	ENSG00000118418	HMGN3
ENSDARG00000104011	rps17	390.141	1.44403	2.7208	0.367538	0.289589	4.9865	6.14843e-07	9.45452e-06	ENSG00000182774	RPS17	ENSG00000182774	RPS17
ENSDARG00000059357	sarnp	79.9759	1.44392	2.72058	0.367568	0.237357	6.08331	1.17726e-09	4.43357e-08	ENSG00000205323	SARNP	ENSG00000205323	SARNP
ENSDARG00000054076	tatdn3	8.20569	1.44341	2.71964	0.367696	0.465813	3.0987	0.00194372	0.0091474
ENSDARG00000074565	pusl1	7.45534	1.44309	2.71902	0.36778	0.412349	3.49967	0.000465829	0.00276309	ENSG00000169972	PUSL1	ENSG00000169972	PUSL1
ENSDARG00000087093	si:ch211-157c3.4	42.5831	1.44108	2.71523	0.368293	0.385676	3.73649	0.000186608	0.00126679	ENSG00000283516	AC022167.5	ENSG00000283516	AC022167.5
ENSDARG00000056806	pde5aa	6.66314	1.44016	2.71351	0.368526	0.544099	2.64687	0.008124	0.0299684
ENSDARG00000063162	cmtm8b	3.67517	1.43714	2.70783	0.3693	0.618417	2.32389	0.0201312	0.0627128	ENSG00000170293	CMTM8	ENSG00000170293	CMTM8
ENSDARG00000016964		31.3082	1.43689	2.70736	0.369363	0.259488	5.5374	3.06999e-08	7.10603e-07	ENSG00000050393	MCUR1	ENSG00000050393	MCUR1
ENSDARG00000003527	mak16	74.659	1.43648	2.7066	0.369467	0.250692	5.73007	1.00389e-08	2.75046e-07	ENSG00000198042	MAK16	ENSG00000198042	MAK16
ENSDARG00000095579	fis1	48.2173	1.43627	2.70621	0.36952	0.241575	5.94545	2.75701e-09	9.00724e-08	ENSG00000214253	FIS1	ENSG00000214253	FIS1
ENSDARG00000028201	commd8	37.9389	1.43612	2.70592	0.36956	0.287742	4.991	6.00666e-07	9.27313e-06	ENSG00000169019	COMMD8	ENSG00000169019	COMMD8
ENSDARG00000035570	zgc:101016	69.5462	1.43595	2.70561	0.369603	0.319067	4.50048	6.78006e-06	7.51795e-05	ENSG00000155621	C9orf85	ENSG00000155621	C9orf85
ENSDARG00000028333	nitr9	5.54923	1.43547	2.70471	0.369726	0.665169	2.15806	0.0309234	0.0889606
ENSDARG00000035963	ccdc96	28.4903	1.4354	2.70457	0.369744	0.326009	4.40295	1.06791e-05	0.000110322	ENSG00000173013	CCDC96	ENSG00000173013	CCDC96
ENSDARG00000088178	tp53inp2	57.057	1.4351	2.70401	0.369821	0.303669	4.72587	2.29136e-06	2.95706e-05
ENSDARG00000075743	mrpl47	46.4412	1.43475	2.70334	0.369912	0.247716	5.79188	6.96008e-09	1.97485e-07	ENSG00000136522	MRPL47	ENSG00000136522	MRPL47
ENSDARG00000087048	si:dkey-165n16.1	44.5768	1.43377	2.70152	0.370162	0.277303	5.17042	2.33567e-07	4.13975e-06	ENSG00000228439	TSTD3	ENSG00000228439	TSTD3
ENSDARG00000044521	eef1b2	1940.78	1.43349	2.70099	0.370235	0.204407	7.01291	2.33408e-12	2.07493e-10	ENSG00000114942	EEF1B2	ENSG00000114942	EEF1B2
ENSDARG00000042876	abracl	156.712	1.43317	2.7004	0.370315	0.190992	7.50385	6.19714e-14	8.22829e-12	ENSG00000146386	ABRACL	ENSG00000146386	ABRACL
ENSDARG00000031293	dnajc9	73.9441	1.43283	2.69975	0.370404	0.359844	3.9818	6.83961e-05	0.00053846	ENSG00000213551	DNAJC9	ENSG00000213551	DNAJC9
ENSDARG00000009950	edf1	271.381	1.43264	2.6994	0.370453	0.19996	7.16462	7.8003e-13	7.91999e-11	ENSG00000107223	EDF1	ENSG00000107223	EDF1
ENSDARG00000038612	pih1d3	23.8201	1.43225	2.69867	0.370553	0.441549	3.24369	0.00117992	0.00604044	ENSG00000080572	PIH1D3	ENSG00000080572	PIH1D3
ENSDARG00000069507	mettl27	20.514	1.4315	2.69727	0.370746	0.313682	4.56354	5.02992e-06	5.78327e-05	ENSG00000165171	METTL27	ENSG00000165171	METTL27
ENSDARG00000077815	cdc26	19.334	1.43073	2.69584	0.370942	0.402271	3.55664	0.000375627	0.00229171	ENSG00000176386	CDC26	ENSG00000176386	CDC26
ENSDARG00000026865	fam107b	76.548	1.42981	2.69412	0.371179	0.286924	4.98325	6.25254e-07	9.59325e-06	ENSG00000065809	FAM107B	ENSG00000065809	FAM107B
ENSDARG00000004436	fam92a1	24.9343	1.4296	2.69371	0.371235	0.354059	4.03773	5.39709e-05	0.000441683	ENSG00000188343	FAM92A	ENSG00000188343	FAM92A
ENSDARG00000027143	aptx	20.972	1.428	2.69074	0.371645	0.317195	4.50196	6.73296e-06	7.46973e-05	ENSG00000137074	APTX	ENSG00000137074	APTX
ENSDARG00000060199	mrpl18	72.6859	1.42794	2.69063	0.371661	0.225288	6.3383	2.32314e-10	1.09362e-08	ENSG00000112110	MRPL18	ENSG00000112110	MRPL18
ENSDARG00000090489	ANKRD66	21.6931	1.42705	2.68895	0.371892	0.503627	2.83354	0.00460357	0.0187586	ENSG00000230062	ANKRD66	ENSG00000230062	ANKRD66
ENSDARG00000004785	cops2	227.805	1.42682	2.68853	0.371951	0.187844	7.59575	3.06025e-14	4.31204e-12	ENSG00000166200	COPS2	ENSG00000166200	COPS2
ENSDARG00000068503	gbgt1l4	17.4047	1.42563	2.68632	0.372257	0.454074	3.13964	0.00169157	0.00813123	ENSG00000148288	GBGT1	ENSG00000148288	GBGT1
ENSDARG00000077263	si:ch73-27e22.3	3.8465	1.42469	2.68457	0.372499	0.599977	2.37458	0.017569	0.0562192
ENSDARG00000043898	timm10b	44.308	1.42365	2.68264	0.372768	0.341713	4.16622	3.09691e-05	0.000276374	ENSG00000132286	TIMM10B
ENSDARG00000036625	polr2f	91.5146	1.42314	2.68169	0.3729	0.20025	7.10682	1.1875e-12	1.15478e-10	ENSG00000100142	POLR2F	ENSG00000100142	POLR2F
ENSDARG00000033950	lamb2l	90.1949	1.42301	2.68144	0.372934	0.532636	2.67164	0.00754823	0.0282214
ENSDARG00000027465	rmnd1	28.5229	1.42276	2.68098	0.372998	0.231634	6.14229	8.13425e-10	3.22151e-08	ENSG00000155906	RMND1	ENSG00000155906	RMND1
ENSDARG00000073910	cinp	24.6125	1.4215	2.67864	0.373323	0.434623	3.27065	0.00107299	0.00556318	ENSG00000100865	CINP	ENSG00000100865	CINP
ENSDARG00000042785	pitx1	10.2207	1.41995	2.67576	0.373725	0.550512	2.57933	0.00989927	0.0350982	ENSG00000069011	PITX1	ENSG00000069011	PITX1
ENSDARG00000037570	polr1d	32.7675	1.4189	2.67382	0.373997	0.42007	3.37777	0.000730761	0.00403741	ENSG00000186184	POLR1D	ENSG00000186184	POLR1D
ENSDARG00000043360	dph3	12.9676	1.41856	2.67319	0.374084	0.437056	3.24573	0.00117149	0.00600474	ENSG00000154813	DPH3	ENSG00000154813	DPH3
ENSDARG00000104505		7.73922	1.41842	2.67292	0.374122	0.500185	2.83579	0.00457126	0.0186571	ENSG00000166965	RCCD1	ENSG00000166965	RCCD1
ENSDARG00000067992	si:dkey-31e10.5	6.73782	1.41829	2.67268	0.374156	0.493904	2.87159	0.00408417	0.0169768	ENSG00000091972	CD200	ENSG00000091972	CD200
ENSDARG00000076836	gpx4b	377.781	1.41817	2.67246	0.374187	0.241227	5.87898	4.12793e-09	1.28189e-07	ENSG00000167468	GPX4	ENSG00000167468	GPX4
ENSDARG00000030241	vbp1	110.789	1.41813	2.6724	0.374196	0.213228	6.65077	2.91555e-11	1.77617e-09	ENSG00000155959	VBP1	ENSG00000155959	VBP1
ENSDARG00000053995	gpank1	22.078	1.41786	2.67189	0.374267	0.304711	4.65312	3.26945e-06	4.00001e-05	ENSG00000204438	GPANK1	ENSG00000204438	GPANK1
ENSDARG00000052343	spata18	24.9202	1.41748	2.67119	0.374365	0.429034	3.30389	0.000953527	0.00503195	ENSG00000163071	SPATA18	ENSG00000163071	SPATA18
ENSDARG00000071333	si:ch211-212d10.2	8.52473	1.41719	2.67065	0.374441	0.408716	3.46742	0.000525483	0.00305654
ENSDARG00000021370	actr6	47.44	1.41697	2.67023	0.374499	0.229708	6.16856	6.89168e-10	2.77719e-08	ENSG00000075089	ACTR6	ENSG00000075089	ACTR6
ENSDARG00000090386	cd3eap	51.7179	1.41691	2.67014	0.374513	0.250363	5.65945	1.51862e-08	3.88815e-07	ENSG00000117877	CD3EAP	ENSG00000117877	CD3EAP
ENSDARG00000031776	FTL (1 of many)	685.246	1.41678	2.66989	0.374547	0.215504	6.57428	4.88903e-11	2.7593e-09	ENSG00000087086	FTL	ENSG00000087086	FTL
ENSDARG00000095451	si:ch211-196l7.4	31.3628	1.41621	2.66883	0.374696	0.331492	4.27223	1.93532e-05	0.000184042
ENSDARG00000100938	hint2	12.5926	1.41593	2.66831	0.374769	0.28252	5.01177	5.3931e-07	8.46908e-06	ENSG00000137133	HINT2	ENSG00000137133	HINT2
ENSDARG00000022939	ino80e	31.0662	1.41554	2.66759	0.374871	0.328934	4.3034	1.68196e-05	0.000163025	ENSG00000169592	INO80E	ENSG00000169592	INO80E
ENSDARG00000030479	hmgb1b	324.581	1.41397	2.66469	0.375278	0.233233	6.06248	1.34042e-09	4.93145e-08	ENSG00000189403	HMGB1	ENSG00000189403	HMGB1
ENSDARG00000099728	zgc:56622	27.6961	1.4135	2.66382	0.375401	0.583765	2.42135	0.0154632	0.0504629
ENSDARG00000036775	dtd2	19.0318	1.41238	2.66177	0.37569	0.358242	3.94254	8.06225e-05	0.000620309	ENSG00000203546	AL139353.1
ENSDARG00000087693	atox1	54.8466	1.41232	2.66166	0.375706	0.299167	4.72086	2.34853e-06	3.02332e-05	ENSG00000177556	ATOX1	ENSG00000177556	ATOX1
ENSDARG00000027428	rpp30	32.0324	1.41109	2.65938	0.376027	0.419108	3.3669	0.00076019	0.00417329	ENSG00000148688	RPP30	ENSG00000148688	RPP30
ENSDARG00000071164	alkbh1	19.6481	1.41088	2.659	0.376081	0.371497	3.79783	0.000145966	0.00102977	ENSG00000100601	ALKBH1	ENSG00000100601	ALKBH1
ENSDARG00000055976	pecr	46.3599	1.40961	2.65665	0.376415	0.287483	4.90326	9.42585e-07	1.37491e-05	ENSG00000115425	PECR	ENSG00000115425	PECR
ENSDARG00000103187	syce2	93.4901	1.40937	2.6562	0.376477	0.498524	2.82708	0.00469748	0.0190705	ENSG00000161860	SYCE2	ENSG00000161860	SYCE2
ENSDARG00000000760	znf511	16.25	1.40877	2.65511	0.376632	0.530458	2.65577	0.0079128	0.0293356	ENSG00000198546	ZNF511
ENSDARG00000029406	h2afx	55.9489	1.40737	2.65254	0.376997	0.446079	3.15499	0.00160504	0.00778998	ENSG00000188486	H2AFX	ENSG00000188486	H2AFX
ENSDARG00000018491	pdia4	617.926	1.40731	2.65243	0.377013	0.226042	6.22588	4.7885e-10	2.03246e-08	ENSG00000155660	PDIA4	ENSG00000155660	PDIA4
ENSDARG00000039827	bbs5	11.346	1.40676	2.65141	0.377158	0.400534	3.51221	0.0004444	0.00264888	ENSG00000251569	AC093899.2
ENSDARG00000037245	trmo	33.4743	1.40654	2.65101	0.377215	0.395457	3.55675	0.000375474	0.00229145	ENSG00000136932	TRMO	ENSG00000136932	TRMO
ENSDARG00000043806	postna	228.003	1.40485	2.6479	0.377658	0.487886	2.87946	0.00398358	0.0166187	ENSG00000133110	POSTN	ENSG00000133110	POSTN
ENSDARG00000056381	cfap97	68.2348	1.404	2.64634	0.37788	0.392988	3.57263	0.000353415	0.0021832	ENSG00000164323	CFAP97	ENSG00000164323	CFAP97
ENSDARG00000015752	zap70	8.7553	1.40029	2.63954	0.378853	0.663083	2.11179	0.0347048	0.0975229	ENSG00000115085	ZAP70	ENSG00000115085	ZAP70
ENSDARG00000007708	nsa2	827.15	1.40012	2.63923	0.378898	0.245741	5.69753	1.21554e-08	3.22374e-07	ENSG00000164346	NSA2	ENSG00000164346	NSA2
ENSDARG00000104620	CABZ01118004.1	9.56	1.39995	2.63893	0.378941	0.453685	3.08574	0.00203044	0.00947859	ENSG00000150667	FSIP1	ENSG00000150667	FSIP1
ENSDARG00000058079	txndc17	43.0231	1.39954	2.63817	0.379051	0.330039	4.24052	2.23001e-05	0.000208534	ENSG00000129235	TXNDC17	ENSG00000129235	TXNDC17
ENSDARG00000033370	ppil3	9.14443	1.39915	2.63746	0.379153	0.30332	4.61279	3.97305e-06	4.72879e-05	ENSG00000240344	PPIL3	ENSG00000240344	PPIL3
ENSDARG00000056914	emg1	22.2946	1.39857	2.6364	0.379305	0.316862	4.41382	1.01565e-05	0.00010582	ENSG00000268439	EMG1
ENSDARG00000104221	sat2b	10.9813	1.39814	2.63561	0.379419	0.576216	2.42641	0.015249	0.0498582
ENSDARG00000060109	aggf1	89.1875	1.39779	2.63497	0.37951	0.379974	3.67864	0.000234479	0.00154526	ENSG00000164252	AGGF1	ENSG00000164252	AGGF1
ENSDARG00000007359		46.0595	1.39717	2.63384	0.379673	0.347143	4.02476	5.70325e-05	0.000463079	ENSG00000186150	UBL4B
ENSDARG00000036678	trmt10a	49.583	1.39685	2.63326	0.379757	0.346717	4.0288	5.6062e-05	0.000456452	ENSG00000145331	TRMT10A	ENSG00000145331	TRMT10A
ENSDARG00000018328	rhocb	158.126	1.39575	2.63125	0.380047	0.202886	6.87948	6.00735e-12	4.62082e-10	ENSG00000155366	RHOC	ENSG00000155366	RHOC
ENSDARG00000102060	zgc:92873	12.8247	1.39575	2.63125	0.380048	0.387873	3.59846	0.000320103	0.00201651	ENSG00000149179	C11orf49	ENSG00000149179	C11orf49
ENSDARG00000044405	ttc4	46.3535	1.39568	2.63113	0.380065	0.224709	6.21107	5.2624e-10	2.21096e-08	ENSG00000243725	TTC4	ENSG00000243725	TTC4
ENSDARG00000058566	si:dkey-253d23.5	17.6272	1.39567	2.6311	0.380069	0.399997	3.48919	0.000484485	0.00285495
ENSDARG00000098507	lyar	62.8307	1.39507	2.63001	0.380227	0.293263	4.75706	1.96437e-06	2.59325e-05	ENSG00000145220	LYAR	ENSG00000145220	LYAR
ENSDARG00000069241	ttc32	18.0048	1.39499	2.62987	0.380247	0.370934	3.76075	0.000169402	0.00116495	ENSG00000183891	TTC32	ENSG00000183891	TTC32
ENSDARG00000008551	pole3	115.631	1.39356	2.62727	0.380623	0.269529	5.17038	2.3362e-07	4.13975e-06	ENSG00000148229	POLE3	ENSG00000148229	POLE3
ENSDARG00000086753	gb:bc139872	12.8279	1.39338	2.62693	0.380672	0.365266	3.8147	0.00013635	0.000969524	ENSG00000171159	C9orf16	ENSG00000171159	C9orf16
ENSDARG00000052072	dnajb9a	6.19986	1.39282	2.62591	0.38082	0.657011	2.11993	0.0340121	0.0959667	ENSG00000128590	DNAJB9	ENSG00000128590	DNAJB9
ENSDARG00000044752	p2rx4a	74.2949	1.39275	2.62579	0.380838	0.213805	6.51413	7.31128e-11	3.89302e-09	ENSG00000135124	P2RX4	ENSG00000135124	P2RX4
ENSDARG00000016056	mhc1laa	20.1065	1.39168	2.62383	0.381122	0.26117	5.32862	9.8964e-08	1.9767e-06	ENSG00000153029	MR1	ENSG00000153029	MR1
ENSDARG00000076357	CABZ01102039.1	19.7319	1.3916	2.62369	0.381143	0.485284	2.86759	0.00413608	0.0171513
ENSDARG00000057027	rtn2b	120.225	1.3914	2.62333	0.381195	0.485835	2.86394	0.0041841	0.0173296	ENSG00000125744	RTN2	ENSG00000125744	RTN2
ENSDARG00000043304	nop2	133.702	1.39139	2.62332	0.381196	0.272287	5.11003	3.2211e-07	5.5052e-06	ENSG00000111641	NOP2	ENSG00000111641	NOP2
ENSDARG00000034771	rab13	95.5953	1.38955	2.61997	0.381683	0.250802	5.54042	3.01741e-08	7.03032e-07	ENSG00000143545	RAB13	ENSG00000143545	RAB13
ENSDARG00000004706	syf2	91.2249	1.38876	2.61853	0.381894	0.235886	5.88741	3.92287e-09	1.23187e-07	ENSG00000117614	SYF2	ENSG00000117614	SYF2
ENSDARG00000089921	smim4	30.5846	1.38797	2.61711	0.382101	0.288543	4.81028	1.50718e-06	2.08399e-05	ENSG00000168273	SMIM4	ENSG00000168273	SMIM4
ENSDARG00000046081	bloc1s2	30.1286	1.3871	2.61552	0.382333	0.241783	5.73696	9.63884e-09	2.64814e-07	ENSG00000196072	BLOC1S2	ENSG00000196072	BLOC1S2
ENSDARG00000007624	gins1	36.4856	1.3866	2.61461	0.382466	0.32299	4.29299	1.76279e-05	0.00016959	ENSG00000101003	GINS1	ENSG00000101003	GINS1
ENSDARG00000075492	ccdc160	23.1287	1.38617	2.61383	0.38258	0.47553	2.91499	0.00355699	0.0150697
ENSDARG00000015110	slc18a2	3.12901	1.38602	2.61357	0.382618	0.572582	2.42065	0.0154927	0.0505355	ENSG00000165646	SLC18A2	ENSG00000165646	SLC18A2
ENSDARG00000033967	trmt2b	16.2216	1.38598	2.61349	0.38263	0.346443	4.0006	6.31834e-05	0.000504712	ENSG00000188917	TRMT2B	ENSG00000188917	TRMT2B
ENSDARG00000006678	pth2r	4.08627	1.3853	2.61226	0.38281	0.415442	3.33452	0.000854466	0.00459464	ENSG00000144407	PTH2R	ENSG00000144407	PTH2R
ENSDARG00000042864	rpl7l1	123.871	1.38474	2.61126	0.382957	0.263839	5.24845	1.53383e-07	2.88028e-06	ENSG00000146223	RPL7L1	ENSG00000146223	RPL7L1
ENSDARG00000042933	bloc1s6	81.0098	1.38461	2.61102	0.382992	0.278831	4.96578	6.84265e-07	1.04062e-05	ENSG00000104164	BLOC1S6	ENSG00000104164	BLOC1S6
ENSDARG00000059177	tax1bp3	81.8676	1.38296	2.60802	0.383433	0.240372	5.7534	8.74647e-09	2.42524e-07	ENSG00000213977	TAX1BP3	ENSG00000213977	TAX1BP3
ENSDARG00000095633	si:ch211-133l5.7	437.831	1.38224	2.60673	0.383622	0.462196	2.9906	0.00278432	0.0123388
ENSDARG00000070478	amn1	11.0503	1.38091	2.60432	0.383978	0.354578	3.8945	9.83998e-05	0.000733677	ENSG00000151743	AMN1	ENSG00000151743	AMN1
ENSDARG00000071678	atcaya	5.21588	1.37963	2.60202	0.384317	0.574771	2.40032	0.0163809	0.0529739	ENSG00000167654	ATCAY	ENSG00000167654	ATCAY
ENSDARG00000053365	rpl31	1744.98	1.37948	2.60174	0.384358	0.252349	5.46654	4.58895e-08	1.01226e-06	ENSG00000071082	RPL31	ENSG00000071082	RPL31
ENSDARG00000002847	fndc1	190.563	1.37899	2.60086	0.384488	0.386855	3.56462	0.000364384	0.00223828	ENSG00000164694	FNDC1	ENSG00000164694	FNDC1
ENSDARG00000100564		60.1773	1.37837	2.59974	0.384654	0.237867	5.79468	6.8451e-09	1.94756e-07	ENSG00000120725	SIL1	ENSG00000120725	SIL1
ENSDARG00000092483	iqcc	19.5238	1.37734	2.59788	0.384929	0.381192	3.61324	0.000302399	0.0019184	ENSG00000160051	IQCC	ENSG00000160051	IQCC
ENSDARG00000090232	clpb	74.3714	1.3773	2.59782	0.384939	0.405744	3.39451	0.00068752	0.00383637	ENSG00000162129	CLPB	ENSG00000162129	CLPB
ENSDARG00000089838	si:dkey-262k9.4	24.8317	1.37715	2.59754	0.384979	0.592592	2.32394	0.0201288	0.0627128
ENSDARG00000009657	fgfr1op2	58.7223	1.37713	2.59751	0.384984	0.257342	5.35135	8.72985e-08	1.76068e-06	ENSG00000111790	FGFR1OP2	ENSG00000111790	FGFR1OP2
ENSDARG00000051731	faap24	20.6284	1.37706	2.59739	0.385002	0.388438	3.54512	0.000392429	0.00237742	ENSG00000131944	FAAP24	ENSG00000131944	FAAP24
ENSDARG00000056720	utp3	74.0648	1.37613	2.59571	0.385251	0.358056	3.84334	0.000121372	0.000879015	ENSG00000132467	UTP3	ENSG00000132467	UTP3
ENSDARG00000102856	si:ch73-59f11.3	6.69871	1.37569	2.59492	0.385368	0.405104	3.3959	0.000684035	0.00382104
ENSDARG00000099721	znf1002	8.76236	1.3751	2.59385	0.385527	0.503924	2.72877	0.00635703	0.0244929
ENSDARG00000077044	arl6ip5a	14.5431	1.37484	2.5934	0.385595	0.349959	3.92858	8.54474e-05	0.000650618	ENSG00000144746	ARL6IP5	ENSG00000144746	ARL6IP5
ENSDARG00000078433	spc25	34.8541	1.3747	2.59314	0.385632	0.308609	4.45451	8.40859e-06	8.99159e-05	ENSG00000152253	SPC25	ENSG00000152253	SPC25
ENSDARG00000025788	chp2	44.0627	1.37441	2.59262	0.38571	0.261915	5.24754	1.54143e-07	2.88676e-06	ENSG00000166869	CHP2	ENSG00000166869	CHP2
ENSDARG00000093656	si:dkeyp-2e4.6	11.7561	1.37404	2.59195	0.38581	0.463001	2.96767	0.00300064	0.0131233
ENSDARG00000058252	adamts15b	14.5746	1.37318	2.59041	0.386039	0.558772	2.4575	0.0139909	0.0465831	ENSG00000134917	ADAMTS8	ENSG00000134917	ADAMTS8
ENSDARG00000036888	zgc:153935	36.8677	1.37195	2.5882	0.386368	0.482426	2.84386	0.00445713	0.0182524	ENSG00000185753	CXorf38	ENSG00000185753	CXorf38
ENSDARG00000101526	si:dkey-82o10.4	6.29332	1.37162	2.58762	0.386456	0.53856	2.54684	0.0108704	0.0380013
ENSDARG00000104228	lypla1	11.6442	1.36918	2.58324	0.387111	0.310374	4.41139	1.02711e-05	0.000106761	ENSG00000120992	LYPLA1	ENSG00000120992	LYPLA1
ENSDARG00000041421	taz	46.0035	1.36899	2.5829	0.387162	0.229902	5.95466	2.60614e-09	8.60942e-08	ENSG00000102125	TAZ	ENSG00000102125	TAZ
ENSDARG00000024829	tnw	48.1744	1.36883	2.5826	0.387206	0.373372	3.66612	0.000246261	0.00161469	ENSG00000120332	TNN	ENSG00000120332	TNN
ENSDARG00000068256	rwdd	42.2938	1.36873	2.58243	0.387232	0.208501	6.56462	5.21643e-11	2.91234e-09	ENSG00000182552	RWDD4	ENSG00000182552	RWDD4
ENSDARG00000058053	serping1	309.762	1.36811	2.58133	0.387398	0.340575	4.01707	5.89264e-05	0.000476216	ENSG00000149131	SERPING1	ENSG00000149131	SERPING1
ENSDARG00000041923	ccl38.6	9.53481	1.36811	2.58132	0.387399	0.329472	4.15243	3.2897e-05	0.00029107
ENSDARG00000021753	ccdc25	45.7675	1.36776	2.5807	0.387492	0.314244	4.35254	1.34569e-05	0.00013423	ENSG00000147419	CCDC25	ENSG00000147419	CCDC25
ENSDARG00000096411	si:dkey-261j15.2	41.5024	1.36732	2.57992	0.387609	0.279516	4.89176	9.99388e-07	1.44656e-05
ENSDARG00000043719	c3a.6	629.823	1.36702	2.57937	0.387691	0.61342	2.22852	0.0258457	0.0770277	ENSG00000125730	C3	ENSG00000125730	C3
ENSDARG00000043485	si:ch211-22i13.2	41.7256	1.36573	2.57707	0.388038	0.245515	5.56271	2.65616e-08	6.37509e-07
ENSDARG00000036895	dap1b	98.3121	1.36497	2.57572	0.388242	0.257012	5.31092	1.09071e-07	2.14752e-06
ENSDARG00000053646	adrb3a	7.86594	1.36494	2.57566	0.388251	0.427159	3.19539	0.00139643	0.00694124	ENSG00000188778	ADRB3	ENSG00000188778	ADRB3
ENSDARG00000101877	rbm34	77.8345	1.36344	2.57298	0.388655	0.217086	6.28063	3.37193e-10	1.51175e-08	ENSG00000188739	RBM34	ENSG00000188739	RBM34
ENSDARG00000102266	isg20l2	21.0817	1.36334	2.57279	0.388683	0.308452	4.41993	9.87342e-06	0.000103287	ENSG00000143319	ISG20L2	ENSG00000143319	ISG20L2
ENSDARG00000099207	si:dkey-11f4.7	19.439	1.36319	2.57254	0.388721	0.408794	3.33467	0.000854013	0.0045934
ENSDARG00000060489	mrpl32	51.0349	1.36315	2.57246	0.388733	0.243617	5.59545	2.20051e-08	5.4261e-07	ENSG00000106591	MRPL32	ENSG00000106591	MRPL32
ENSDARG00000092407	zmp:0000001316	7.71952	1.36297	2.57215	0.38878	0.4552	2.99423	0.00275136	0.0122172	ENSG00000104228	TRIM35	ENSG00000104228	TRIM35
ENSDARG00000086100	cd302	39.3317	1.36292	2.57205	0.388795	0.283615	4.80552	1.5435e-06	2.12006e-05	ENSG00000241399	CD302	ENSG00000241399	CD302
ENSDARG00000073867	si:ch211-87h14.3	17.1635	1.3622	2.57077	0.388988	0.259629	5.24673	1.54826e-07	2.89694e-06	ENSG00000006015	REX1BD	ENSG00000006015	REX1BD
ENSDARG00000095515	sdccag3	21.7782	1.36189	2.57023	0.389071	0.279823	4.86699	1.13313e-06	1.61504e-05	ENSG00000165689	SDCCAG3	ENSG00000165689	SDCCAG3
ENSDARG00000074985	aurkaip1	122.058	1.36006	2.56696	0.389566	0.230596	5.89803	3.6787e-09	1.16687e-07	ENSG00000175756	AURKAIP1	ENSG00000175756	AURKAIP1
ENSDARG00000027612	gatad1	22.3096	1.35928	2.56557	0.389776	0.357668	3.8004	0.000144462	0.00102089	ENSG00000157259	GATAD1	ENSG00000157259	GATAD1
ENSDARG00000091215	rpz2	103.317	1.35608	2.55988	0.390643	0.386511	3.50851	0.000450621	0.00268133
ENSDARG00000058225	arpc4l	184.431	1.35564	2.5591	0.390762	0.197636	6.85928	6.92091e-12	5.15263e-10	ENSG00000241553	ARPC4	ENSG00000241553	ARPC4
ENSDARG00000090253	zgc:113223	8.01143	1.35548	2.55883	0.390804	0.514074	2.63675	0.00837053	0.0306811
ENSDARG00000103795	zgc:113348	35.246	1.35395	2.55612	0.391219	0.249875	5.41852	6.00951e-08	1.28102e-06
ENSDARG00000034048	zgc:92275	32.3748	1.35337	2.55509	0.391376	0.644836	2.09879	0.0358356	0.0999547
ENSDARG00000076153	lca5	70.6344	1.35325	2.55487	0.391409	0.40254	3.36178	0.000774432	0.00423561	ENSG00000135338	LCA5	ENSG00000135338	LCA5
ENSDARG00000095170	lrrfip1b	9.34563	1.35246	2.55347	0.391624	0.533795	2.53367	0.0112875	0.0392268	ENSG00000124831	LRRFIP1	ENSG00000124831	LRRFIP1
ENSDARG00000103718	chmp5b	140.679	1.35169	2.55211	0.391832	0.222855	6.06533	1.31681e-09	4.86185e-08	ENSG00000086065	CHMP5	ENSG00000086065	CHMP5
ENSDARG00000101324	apoa1b	30071	1.35147	2.55173	0.391892	0.532004	2.54034	0.0110744	0.0386362	ENSG00000118137	APOA1	ENSG00000118137	APOA1
ENSDARG00000069790	dynll2a	109.082	1.35069	2.55034	0.392105	0.579815	2.32952	0.0198318	0.0619198	ENSG00000264364	DYNLL2	ENSG00000264364	DYNLL2
ENSDARG00000099978	CABZ01078427.1	9.14251	1.35043	2.54988	0.392175	0.549234	2.45875	0.013942	0.0464428
ENSDARG00000003027	scnm1	43.5189	1.34984	2.54884	0.392335	0.37542	3.59555	0.000323706	0.00203241	ENSG00000163156	SCNM1	ENSG00000163156	SCNM1
ENSDARG00000030881	baxb	13.6184	1.34948	2.5482	0.392434	0.294939	4.57546	4.75179e-06	5.51086e-05	ENSG00000087088	BAX	ENSG00000087088	BAX
ENSDARG00000092605	znf1003	35.3192	1.34942	2.5481	0.392449	0.43558	3.09799	0.00194839	0.00915958
ENSDARG00000010300	traf3ip1	44.7799	1.3486	2.54666	0.392672	0.300369	4.48983	7.12791e-06	7.82823e-05	ENSG00000204104	TRAF3IP1	ENSG00000204104	TRAF3IP1
ENSDARG00000044544	zgc:110782	16.4387	1.34858	2.54662	0.392677	0.26414	5.10556	3.29811e-07	5.59949e-06
ENSDARG00000017272	eapp	42.193	1.34824	2.54601	0.392771	0.335915	4.01364	5.97899e-05	0.000482127	ENSG00000129518	EAPP	ENSG00000129518	EAPP
ENSDARG00000012072	atp5s	26.7005	1.34817	2.5459	0.392789	0.294846	4.57246	4.82021e-06	5.57771e-05	ENSG00000125375	ATP5S	ENSG00000125375	ATP5S
ENSDARG00000100363	dcun1d5	130.382	1.34756	2.54481	0.392957	0.247489	5.4449	5.18342e-08	1.12777e-06	ENSG00000137692	DCUN1D5	ENSG00000137692	DCUN1D5
ENSDARG00000010312	cp	3334.44	1.34689	2.54363	0.393139	0.525983	2.56071	0.0104459	0.0367783
ENSDARG00000017315	larp7	67.4075	1.34651	2.54296	0.393243	0.334212	4.0289	5.60382e-05	0.000456437	ENSG00000174720	LARP7	ENSG00000174720	LARP7
ENSDARG00000102473	zgc:171673	25.581	1.34637	2.54271	0.393281	0.322288	4.17753	2.94697e-05	0.000264834
ENSDARG00000099586		9.0571	1.34575	2.54161	0.393451	0.477634	2.81752	0.00483958	0.019548	ENSG00000170627	GTSF1	ENSG00000170627	GTSF1
ENSDARG00000087779	pum3	132.306	1.34558	2.54132	0.393496	0.272909	4.93051	8.20149e-07	1.21254e-05	ENSG00000080608	PUM3	ENSG00000080608	PUM3
ENSDARG00000091734	traf3ip2l	32.3376	1.34545	2.5411	0.39353	0.286355	4.69855	2.62017e-06	3.30924e-05	ENSG00000056972	TRAF3IP2	ENSG00000056972	TRAF3IP2
ENSDARG00000055099	fam184b	37.6421	1.3449	2.54013	0.39368	0.480585	2.79847	0.00513449	0.0205389	ENSG00000047662	FAM184B	ENSG00000047662	FAM184B
ENSDARG00000058158	trim55b	22.5033	1.34487	2.54007	0.39369	0.440632	3.05213	0.00227225	0.0103851
ENSDARG00000002190	chmp2bb	156.998	1.34462	2.53963	0.393758	0.250507	5.36759	7.97971e-08	1.63485e-06	ENSG00000083937	CHMP2B	ENSG00000083937	CHMP2B
ENSDARG00000086471	pkig	41.1002	1.34412	2.53876	0.393894	0.27146	4.95146	7.36592e-07	1.10638e-05	ENSG00000168734	PKIG	ENSG00000168734	PKIG
ENSDARG00000088298	si:ch211-235i11.4	8.89754	1.34404	2.53862	0.393916	0.593729	2.26373	0.0235909	0.0715219
ENSDARG00000076755	ap5s1	25.8555	1.34404	2.5386	0.393917	0.22923	5.86326	4.53864e-09	1.39066e-07	ENSG00000125843	AP5S1	ENSG00000125843	AP5S1
ENSDARG00000053446	sub1a	99.7358	1.34324	2.53721	0.394134	0.229327	5.85731	4.70437e-09	1.42043e-07	ENSG00000113387	SUB1	ENSG00000113387	SUB1
ENSDARG00000037229	denr	139.02	1.34315	2.53704	0.39416	0.21704	6.18849	6.07451e-10	2.49646e-08	ENSG00000139726	DENR	ENSG00000139726	DENR
ENSDARG00000100406		1751.03	1.34249	2.53589	0.394338	0.623936	2.15165	0.0314246	0.090102	ENSG00000055955	ITIH4	ENSG00000055955	ITIH4
ENSDARG00000010586	tex9	21.5988	1.34196	2.53496	0.394483	0.43308	3.09865	0.00194404	0.0091474	ENSG00000151575	TEX9	ENSG00000151575	TEX9
ENSDARG00000044420	dnajc19	25.0835	1.34193	2.53491	0.394492	0.333168	4.0278	5.63004e-05	0.000458212	ENSG00000205981	DNAJC19	ENSG00000205981	DNAJC19
ENSDARG00000028889	ndufb10	162.343	1.3414	2.53397	0.394638	0.235628	5.69287	1.24921e-08	3.30881e-07	ENSG00000140990	NDUFB10	ENSG00000140990	NDUFB10
ENSDARG00000003941	rrs1	134.715	1.34027	2.53198	0.394947	0.224785	5.96244	2.485e-09	8.24868e-08	ENSG00000179041	RRS1	ENSG00000179041	RRS1
ENSDARG00000078717	itga8	34.3403	1.34014	2.53176	0.394982	0.377677	3.54837	0.000387618	0.0023524	ENSG00000077943	ITGA8	ENSG00000077943	ITGA8
ENSDARG00000070961	lepr	57.2027	1.33974	2.53107	0.395091	0.477466	2.80595	0.00501686	0.0201423	ENSG00000116678	LEPR	ENSG00000116678	LEPR
ENSDARG00000096514	si:ch211-286b5.2	46.0712	1.33922	2.53015	0.395234	0.473082	2.83085	0.0046425	0.0188808
ENSDARG00000045516	itih2	772.066	1.33891	2.5296	0.395319	0.519315	2.57822	0.00993099	0.0351993	ENSG00000151655	ITIH2	ENSG00000151655	ITIH2
ENSDARG00000054164	mrps17	35.2454	1.3386	2.52905	0.395405	0.265349	5.04466	4.54324e-07	7.32898e-06	ENSG00000249773	AC092647.5
ENSDARG00000027360	si:ch211-106h11.3	11.4082	1.33799	2.52799	0.395572	0.571549	2.34099	0.0192328	0.0604569
ENSDARG00000007207	cnpy2	25.8387	1.33708	2.52639	0.395821	0.324754	4.1172	3.83499e-05	0.000330837	ENSG00000144785	AC073896.1
ENSDARG00000068978	glo1	251.904	1.3364	2.5252	0.396008	0.168643	7.92442	2.29218e-15	4.47905e-13	ENSG00000124767	GLO1	ENSG00000124767	GLO1
ENSDARG00000102827	ubfd1	72.6985	1.33516	2.52304	0.396347	0.259068	5.15373	2.55361e-07	4.49769e-06	ENSG00000103353	UBFD1	ENSG00000103353	UBFD1
ENSDARG00000002872	zgc:113210	31.704	1.33485	2.5225	0.396432	0.341746	3.90598	9.38431e-05	0.0007058
ENSDARG00000058229	acot11a	68.2928	1.33468	2.5222	0.39648	0.24092	5.53992	3.02605e-08	7.03463e-07	ENSG00000162390	ACOT11	ENSG00000162390	ACOT11
ENSDARG00000045773	PYURF	45.6532	1.33465	2.52214	0.396489	0.222466	5.99933	1.98136e-09	6.86177e-08	ENSG00000145337	PYURF	ENSG00000145337	PYURF
ENSDARG00000040713	rbbp9	64.1141	1.33395	2.52092	0.396681	0.256361	5.20341	1.95669e-07	3.55517e-06	ENSG00000089050	RBBP9	ENSG00000089050	RBBP9
ENSDARG00000004167	zgc:110366	19.827	1.33337	2.51991	0.396839	0.29405	4.53451	5.77368e-06	6.50654e-05
ENSDARG00000099650	CABZ01079663.1	11.7424	1.3333	2.51979	0.396859	0.400395	3.32997	0.000868564	0.00464632	ENSG00000127084	FGD3	ENSG00000127084	FGD3
ENSDARG00000058212	ndnl2	55.9983	1.33305	2.51934	0.396929	0.305665	4.36114	1.29387e-05	0.000129593	ENSG00000198798	MAGEB3
ENSDARG00000012947	ska2	74.2572	1.33225	2.51796	0.397147	0.24594	5.41699	6.06092e-08	1.28891e-06	ENSG00000182628	SKA2	ENSG00000182628	SKA2
ENSDARG00000074451	mnd1	44.943	1.33187	2.51728	0.397254	0.3191	4.17382	2.99537e-05	0.000268701	ENSG00000121211	MND1	ENSG00000121211	MND1
ENSDARG00000027899	shfm1	115.991	1.33185	2.51725	0.39726	0.227261	5.86043	4.61663e-09	1.40417e-07
ENSDARG00000014963	triap1	41.4695	1.33105	2.51585	0.39748	0.305532	4.35649	1.32165e-05	0.000132185	ENSG00000170855	TRIAP1	ENSG00000170855	TRIAP1
ENSDARG00000028106	glrx	224.198	1.33054	2.51496	0.39762	0.212125	6.27243	3.55466e-10	1.56989e-08	ENSG00000173221	GLRX	ENSG00000173221	GLRX
ENSDARG00000092987	zmat4a	3.31993	1.33014	2.51428	0.397728	0.566116	2.3496	0.0187938	0.0594133	ENSG00000165061	ZMAT4	ENSG00000165061	ZMAT4
ENSDARG00000075616	polr2k	10.2836	1.33001	2.51404	0.397767	0.527947	2.51921	0.011762	0.0404627	ENSG00000147669	POLR2K	ENSG00000147669	POLR2K
ENSDARG00000013110	dmtn	25.3215	1.32956	2.51326	0.397889	0.345441	3.84888	0.000118657	0.000863882	ENSG00000158856	DMTN	ENSG00000158856	DMTN
ENSDARG00000043554	mrpl40	43.1865	1.32763	2.5099	0.398422	0.232585	5.70815	1.14214e-08	3.0644e-07	ENSG00000185608	MRPL40	ENSG00000185608	MRPL40
ENSDARG00000056162	nr2c2ap	11.8946	1.32748	2.50964	0.398463	0.385658	3.44213	0.000577162	0.0033134	ENSG00000184162	NR2C2AP	ENSG00000184162	NR2C2AP
ENSDARG00000008920	mrpl53	11.7783	1.32745	2.50959	0.398471	0.389939	3.40426	0.000663431	0.00372201	ENSG00000204822	MRPL53	ENSG00000204822	MRPL53
ENSDARG00000078435	anapc13	16.007	1.3273	2.50933	0.398512	0.362785	3.65865	0.000253548	0.00165357	ENSG00000129055	ANAPC13	ENSG00000129055	ANAPC13
ENSDARG00000102417	psmd7	252.862	1.32685	2.50854	0.398638	0.189596	6.99829	2.59101e-12	2.26446e-10	ENSG00000103035	PSMD7	ENSG00000103035	PSMD7
ENSDARG00000019579	ldb2a	40.0086	1.3268	2.50845	0.398653	0.284457	4.6643	3.09665e-06	3.82246e-05	ENSG00000169744	LDB2	ENSG00000169744	LDB2
ENSDARG00000099092	RASGRP2	6.68415	1.32653	2.50799	0.398726	0.44665	2.96996	0.00297837	0.0130535	ENSG00000068831	RASGRP2	ENSG00000068831	RASGRP2
ENSDARG00000102744	mgst3a	253.702	1.32635	2.50768	0.398775	0.229387	5.78216	7.3747e-09	2.08393e-07	ENSG00000143198	MGST3	ENSG00000143198	MGST3
ENSDARG00000041991	rrp9	100.307	1.32445	2.50437	0.399303	0.324585	4.08043	4.49522e-05	0.000379264	ENSG00000114767	RRP9	ENSG00000114767	RRP9
ENSDARG00000004794	ccdc146	49.4899	1.32421	2.50396	0.399368	0.399064	3.31829	0.000905699	0.00481153	ENSG00000135205	CCDC146	ENSG00000135205	CCDC146
ENSDARG00000097824	smco4	57.5314	1.32336	2.50248	0.399604	0.245986	5.3798	7.45672e-08	1.5353e-06	ENSG00000166002	SMCO4	ENSG00000166002	SMCO4
ENSDARG00000103979	calr3a	950.588	1.32282	2.50154	0.399753	0.153281	8.63002	6.13415e-18	2.49131e-15	ENSG00000269058	CALR3	ENSG00000269058	CALR3
ENSDARG00000037633	leng1	28.9909	1.32106	2.49849	0.400241	0.263342	5.01652	5.26171e-07	8.2879e-06	ENSG00000105617	LENG1	ENSG00000105617	LENG1
ENSDARG00000099420	nme2b.2	17503.5	1.32105	2.49849	0.400242	0.516425	2.55808	0.0105252	0.036982	ENSG00000239672	NME1
ENSDARG00000044565	ola1	398.505	1.32047	2.49747	0.400405	0.220357	5.99241	2.06752e-09	7.06677e-08	ENSG00000138430	OLA1	ENSG00000138430	OLA1
ENSDARG00000101115	med30	24.9174	1.32023	2.49706	0.400471	0.445459	2.96376	0.00303909	0.0132607	ENSG00000164758	MED30	ENSG00000164758	MED30
ENSDARG00000009844	dusp23a	10.9251	1.32007	2.49679	0.400514	0.439697	3.00224	0.00268003	0.0119482	ENSG00000158716	DUSP23	ENSG00000158716	DUSP23
ENSDARG00000045696	mrpl23	77.302	1.31963	2.49602	0.400638	0.227148	5.80956	6.26373e-09	1.80949e-07	ENSG00000276345	AC004556.1
ENSDARG00000100505	ddx52	114.965	1.31946	2.49573	0.400685	0.264526	4.98801	6.10036e-07	9.39455e-06	ENSG00000278053	DDX52	ENSG00000278053	DDX52
ENSDARG00000039757	mcfd2	137.765	1.31817	2.4935	0.401043	0.197109	6.68752	2.26979e-11	1.42037e-09	ENSG00000180398	MCFD2	ENSG00000180398	MCFD2
ENSDARG00000052903	rtkn2b	5.67706	1.31743	2.49221	0.40125	0.467185	2.81993	0.00480347	0.0194262
ENSDARG00000019302	mid1ip1b	230.699	1.31726	2.49192	0.401297	0.349195	3.77227	0.000161771	0.00112103	ENSG00000165175	MID1IP1	ENSG00000165175	MID1IP1
ENSDARG00000055400	si:dkey-56f14.7	5.4449	1.31715	2.49173	0.401327	0.606312	2.17239	0.029826	0.086561	ENSG00000155849	ELMO1	ENSG00000155849	ELMO1
ENSDARG00000005513	naca	2463.27	1.31597	2.4897	0.401655	0.232186	5.66774	1.44695e-08	3.73234e-07	ENSG00000196531	NACA
ENSDARG00000091413	TIMM22	26.0909	1.31581	2.48942	0.4017	0.289652	4.54274	5.55289e-06	6.29885e-05	ENSG00000177370	TIMM22	ENSG00000177370	TIMM22
ENSDARG00000057296	cbln1	9.58632	1.31551	2.4889	0.401784	0.436956	3.01062	0.00260716	0.0116736	ENSG00000102924	CBLN1	ENSG00000102924	CBLN1
ENSDARG00000010717	chchd10	130.194	1.3149	2.48785	0.401954	0.243583	5.39815	6.73322e-08	1.41159e-06	ENSG00000250479	CHCHD10	ENSG00000250479	CHCHD10
ENSDARG00000012972	cfl1l	288.846	1.3148	2.48767	0.401982	0.202317	6.49871	8.10134e-11	4.25896e-09	ENSG00000125868	DSTN	ENSG00000125868	DSTN
ENSDARG00000035546	jmjd7	19.2286	1.31446	2.4871	0.402075	0.339606	3.87055	0.000108589	0.000798723	ENSG00000243789	JMJD7	ENSG00000243789	JMJD7
ENSDARG00000068182	crb3b	34.7614	1.31445	2.48708	0.402078	0.319736	4.11105	3.93859e-05	0.000338506
ENSDARG00000042122	acot11b	10.497	1.3141	2.48648	0.402175	0.385072	3.41262	0.000643425	0.00362646	ENSG00000162390	ACOT11	ENSG00000162390	ACOT11
ENSDARG00000051957	selm	39.2052	1.31384	2.48602	0.40225	0.211853	6.20164	5.58779e-10	2.32409e-08	ENSG00000198832	SELENOM	ENSG00000198832	SELENOM
ENSDARG00000004251	dhfr	82.1838	1.31362	2.48565	0.402309	0.195461	6.72064	1.80923e-11	1.1638e-09	ENSG00000178700	DHFR2
ENSDARG00000038222	tyw3	33.226	1.31325	2.485	0.402414	0.518809	2.53128	0.0113648	0.0394107	ENSG00000162623	TYW3	ENSG00000162623	TYW3
ENSDARG00000031126	notum1a	11.8429	1.31322	2.48496	0.402422	0.55985	2.34567	0.0189931	0.0598517	ENSG00000185269	NOTUM	ENSG00000185269	NOTUM
ENSDARG00000042428	gstt1a	257.627	1.31311	2.48477	0.402452	0.365147	3.59612	0.000322996	0.00203042	ENSG00000276950	GSTTP1
ENSDARG00000040306	otomp	3.94716	1.31211	2.48305	0.402731	0.529231	2.47928	0.0131647	0.0444177
ENSDARG00000022218	uck1	19.1789	1.31153	2.48204	0.402894	0.427869	3.06526	0.00217482	0.0100238	ENSG00000130717	UCK1	ENSG00000130717	UCK1
ENSDARG00000027749	hirip3	174.141	1.3109	2.48096	0.40307	0.455716	2.87657	0.00402028	0.0167583	ENSG00000149929	HIRIP3	ENSG00000149929	HIRIP3
ENSDARG00000058504	ap1s2	132.594	1.31081	2.48081	0.403094	0.184608	7.1005	1.24302e-12	1.20312e-10	ENSG00000182287	AP1S2	ENSG00000182287	AP1S2
ENSDARG00000044431	ppig	185.342	1.31031	2.47994	0.403236	0.265626	4.9329	8.1018e-07	1.2021e-05	ENSG00000138398	PPIG	ENSG00000138398	PPIG
ENSDARG00000055708	timm8b	108.496	1.30954	2.47863	0.403449	0.284459	4.60362	4.15212e-06	4.89487e-05	ENSG00000150779	TIMM8B	ENSG00000150779	TIMM8B
ENSDARG00000063049	thtpa	24.0161	1.30932	2.47826	0.40351	0.286798	4.56533	4.98713e-06	5.74518e-05	ENSG00000259431	THTPA	ENSG00000259431	THTPA
ENSDARG00000058454	dynll1	175.044	1.30892	2.47756	0.403623	0.263917	4.95959	7.06422e-07	1.0657e-05
ENSDARG00000045530	si:ch211-244b2.4	29.7724	1.30835	2.47657	0.403784	0.386936	3.3813	0.000721433	0.0039944
ENSDARG00000053950	lin37	43.1549	1.30795	2.47589	0.403895	0.270512	4.83508	1.33091e-06	1.87023e-05	ENSG00000267796	LIN37	ENSG00000267796	LIN37
ENSDARG00000090309	ubxn1	88.1999	1.3075	2.47512	0.40402	0.213534	6.12315	9.17414e-10	3.56518e-08	ENSG00000162191	UBXN1	ENSG00000162191	UBXN1
ENSDARG00000058297	timm13	131.321	1.30748	2.47509	0.404026	0.192502	6.79205	1.10547e-11	7.60721e-10	ENSG00000099800	TIMM13	ENSG00000099800	TIMM13
ENSDARG00000068708	ifrd1	196.472	1.30581	2.47223	0.404493	0.211677	6.16888	6.8774e-10	2.77683e-08	ENSG00000006652	IFRD1	ENSG00000006652	IFRD1
ENSDARG00000021853	ntpcr	21.0991	1.3047	2.47033	0.404804	0.279257	4.67206	2.98196e-06	3.69852e-05	ENSG00000135778	NTPCR	ENSG00000135778	NTPCR
ENSDARG00000102291	eef1da	1007.4	1.30348	2.46824	0.405147	0.164345	7.93136	2.16762e-15	4.35903e-13	ENSG00000104529	EEF1D	ENSG00000104529	EEF1D
ENSDARG00000024602	zgc:162964	56.712	1.30321	2.46777	0.405224	0.223477	5.83152	5.49247e-09	1.61786e-07	ENSG00000182827	ACBD3	ENSG00000182827	ACBD3
ENSDARG00000070623	med10	49.1539	1.30201	2.46572	0.40556	0.213041	6.11155	9.86707e-10	3.8059e-08	ENSG00000133398	MED10	ENSG00000133398	MED10
ENSDARG00000045351	ccdc58	26.6808	1.30163	2.46508	0.405666	0.28588	4.55308	5.2866e-06	6.03313e-05	ENSG00000160124	CCDC58	ENSG00000160124	CCDC58
ENSDARG00000007743	il15l	25.0069	1.30109	2.46416	0.405818	0.291581	4.46221	8.11195e-06	8.72846e-05
ENSDARG00000039346	ndufa5	57.8144	1.30087	2.46378	0.405881	0.226329	5.7477	9.04666e-09	2.50178e-07	ENSG00000128609	NDUFA5	ENSG00000128609	NDUFA5
ENSDARG00000088733	zmp:0000000938	4.81622	1.3004	2.46297	0.406014	0.457215	2.84418	0.00445266	0.0182377	ENSG00000186376	ZNF75D
ENSDARG00000095030	si:ch73-120g24.4	4.46095	1.3001	2.46245	0.406099	0.424721	3.06106	0.00220552	0.010136
ENSDARG00000040290	pon3.2	60.2362	1.29955	2.46153	0.406252	0.233598	5.56321	2.64854e-08	6.37157e-07	ENSG00000005421	PON1
ENSDARG00000105241	btr26	16.1867	1.29908	2.46071	0.406386	0.608473	2.13498	0.0327627	0.0931324	ENSG00000223638	RFPL4A
ENSDARG00000086699	smim15	63.591	1.29815	2.45913	0.406648	0.202295	6.41709	1.389e-10	6.88287e-09	ENSG00000188725	SMIM15	ENSG00000188725	SMIM15
ENSDARG00000040712	adprh	35.4823	1.29811	2.45907	0.406658	0.266723	4.86688	1.13372e-06	1.61504e-05	ENSG00000144843	ADPRH	ENSG00000144843	ADPRH
ENSDARG00000035596	ISCU (1 of many)	85.8203	1.29719	2.45749	0.406919	0.237309	5.46624	4.59689e-08	1.01293e-06	ENSG00000136003	ISCU	ENSG00000136003	ISCU
ENSDARG00000039213	prpf38a	65.4561	1.29667	2.45661	0.407066	0.26523	4.88884	1.0143e-06	1.46609e-05	ENSG00000134748	PRPF38A	ENSG00000134748	PRPF38A
ENSDARG00000053973	fetub	19029.6	1.29609	2.45563	0.407227	0.582499	2.22506	0.0260773	0.0776286	ENSG00000090512	FETUB	ENSG00000090512	FETUB
ENSDARG00000060036	aimp1	155.36	1.29517	2.45407	0.407487	0.231808	5.58727	2.30664e-08	5.64744e-07	ENSG00000164022	AIMP1	ENSG00000164022	AIMP1
ENSDARG00000059816	zgc:136864	34.8734	1.29484	2.4535	0.407582	0.339425	3.8148	0.000136294	0.000969459	ENSG00000104979	C19orf53	ENSG00000104979	C19orf53
ENSDARG00000097489	si:ch73-390p7.2	20.4062	1.29453	2.45297	0.407669	0.301302	4.29644	1.7356e-05	0.000167217
ENSDARG00000026183	polr2eb	58.6921	1.29444	2.45282	0.407693	0.196867	6.57523	4.85783e-11	2.74919e-09	ENSG00000099817	POLR2E	ENSG00000099817	POLR2E
ENSDARG00000104517	uqcr10	216.755	1.29363	2.45144	0.407923	0.258943	4.99581	5.85899e-07	9.10407e-06	ENSG00000184076	UQCR10	ENSG00000184076	UQCR10
ENSDARG00000007494	st3gal8	117.153	1.29336	2.45099	0.407999	0.32425	3.98878	6.64152e-05	0.00052446
ENSDARG00000015747	aarsd1	23.9522	1.29232	2.44921	0.408294	0.270355	4.78008	1.75227e-06	2.34918e-05	ENSG00000266967	AARSD1	ENSG00000266967	AARSD1
ENSDARG00000041306	mrps25	59.3608	1.29214	2.44891	0.408344	0.196937	6.56119	5.33804e-11	2.96426e-09	ENSG00000131368	MRPS25	ENSG00000131368	MRPS25
ENSDARG00000070331	muc5.1	442.954	1.29181	2.44834	0.40844	0.512379	2.52119	0.0116958	0.040307	ENSG00000117983	MUC5B	ENSG00000117983	MUC5B
ENSDARG00000003599	rpl3	4691.8	1.29171	2.44819	0.408465	0.210661	6.13173	8.69279e-10	3.41658e-08	ENSG00000100316	RPL3	ENSG00000100316	RPL3
ENSDARG00000069980	lman1	324.884	1.29095	2.44689	0.408682	0.190437	6.77886	1.21126e-11	8.19899e-10	ENSG00000074695	LMAN1	ENSG00000074695	LMAN1
ENSDARG00000043442		43.3617	1.29088	2.44678	0.408701	0.372985	3.46095	0.000538279	0.00312133	ENSG00000172005	MAL	ENSG00000172005	MAL
ENSDARG00000033889	spty2d1	162.129	1.29045	2.44604	0.408825	0.298015	4.33013	1.49021e-05	0.000146496	ENSG00000179119	SPTY2D1	ENSG00000179119	SPTY2D1
ENSDARG00000074781	ptprt	12.496	1.2896	2.4446	0.409065	0.509396	2.53162	0.0113538	0.0393921	ENSG00000196090	PTPRT	ENSG00000196090	PTPRT
ENSDARG00000004527	pin4	46.872	1.28947	2.44439	0.409101	0.256626	5.02471	5.04206e-07	7.99665e-06	ENSG00000102309	PIN4	ENSG00000102309	PIN4
ENSDARG00000037906	alkbh7	29.9558	1.28782	2.44158	0.40957	0.285827	4.50558	6.61923e-06	7.37516e-05	ENSG00000125652	ALKBH7	ENSG00000125652	ALKBH7
ENSDARG00000002002	lmcd1	26.8096	1.28748	2.44102	0.409665	0.42518	3.02809	0.00246104	0.0111349	ENSG00000071282	LMCD1	ENSG00000071282	LMCD1
ENSDARG00000104904	si:ch73-221f6.1	21.2098	1.28735	2.4408	0.409702	0.351791	3.65942	0.000252783	0.00164974
ENSDARG00000098401	fam136a	18.5793	1.28696	2.44014	0.409813	0.402817	3.1949	0.00139877	0.00694623	ENSG00000035141	FAM136A	ENSG00000035141	FAM136A
ENSDARG00000056193	nme7	32.2722	1.28689	2.44002	0.409832	0.245505	5.24183	1.58991e-07	2.96415e-06	ENSG00000143156	NME7	ENSG00000143156	NME7
ENSDARG00000104017	CABZ01084613.1	32.0809	1.28675	2.43978	0.409873	0.335288	3.83775	0.000124164	0.000895792
ENSDARG00000088690	ddias	9.00766	1.28511	2.43701	0.410339	0.386386	3.32598	0.000881098	0.00470123	ENSG00000165490	DDIAS	ENSG00000165490	DDIAS
ENSDARG00000090568	mrpl52	19.4009	1.2842	2.43547	0.410598	0.318947	4.02639	5.66409e-05	0.00046044	ENSG00000172590	MRPL52	ENSG00000172590	MRPL52
ENSDARG00000012674	rpusd4	28.7346	1.28397	2.43508	0.410664	0.266975	4.80933	1.51434e-06	2.08971e-05	ENSG00000165526	RPUSD4	ENSG00000165526	RPUSD4
ENSDARG00000054301	kti12	32.1527	1.28376	2.43473	0.410723	0.318553	4.02999	5.57797e-05	0.000454689	ENSG00000198841	KTI12	ENSG00000198841	KTI12
ENSDARG00000062171	olfml3b	76.8528	1.28314	2.43367	0.410901	0.377802	3.39632	0.000682991	0.00381624	ENSG00000116774	OLFML3	ENSG00000116774	OLFML3
ENSDARG00000009046	nphp1	44.025	1.28305	2.43353	0.410925	0.474148	2.70602	0.00680958	0.0259372	ENSG00000144061	NPHP1	ENSG00000144061	NPHP1
ENSDARG00000063451	ccdc13	25.1724	1.28206	2.43185	0.411209	0.560922	2.28562	0.0222763	0.0681634	ENSG00000244607	CCDC13	ENSG00000244607	CCDC13
ENSDARG00000093687	si:dkey-193c22.1	22.7074	1.28111	2.43026	0.411479	0.231134	5.54271	2.97826e-08	6.95477e-07
ENSDARG00000019222	mrpl24	62.7168	1.28067	2.42952	0.411605	0.196471	6.51837	7.10735e-11	3.79419e-09	ENSG00000143314	MRPL24	ENSG00000143314	MRPL24
ENSDARG00000042539	ywhaqa	584.45	1.28013	2.42861	0.411759	0.17184	7.44956	9.36512e-14	1.18546e-11	ENSG00000134308	YWHAQ
ENSDARG00000041414	bmf2	3.98022	1.27916	2.42697	0.412036	0.595645	2.14752	0.0317523	0.0909033
ENSDARG00000020301	os9	182.269	1.27901	2.42673	0.412077	0.181236	7.05717	1.69934e-12	1.58551e-10	ENSG00000135506	OS9	ENSG00000135506	OS9
ENSDARG00000045269	pts	26.6056	1.27885	2.42646	0.412123	0.356298	3.58928	0.000331591	0.00207	ENSG00000150787	PTS	ENSG00000150787	PTS
ENSDARG00000026892	gpatch11	21.5358	1.2788	2.42637	0.412139	0.294408	4.34362	1.40155e-05	0.000138901	ENSG00000152133	GPATCH11	ENSG00000152133	GPATCH11
ENSDARG00000044692	eri1	68.5653	1.27856	2.42597	0.412207	0.267402	4.78141	1.74071e-06	2.33713e-05	ENSG00000104626	ERI1	ENSG00000104626	ERI1
ENSDARG00000104837	nudc	142.269	1.27802	2.42505	0.412362	0.213272	5.99241	2.06752e-09	7.06677e-08	ENSG00000090273	NUDC	ENSG00000090273	NUDC
ENSDARG00000002077	mnat1	25.0291	1.27787	2.42481	0.412403	0.275196	4.6435	3.4255e-06	4.16143e-05	ENSG00000020426	MNAT1	ENSG00000020426	MNAT1
ENSDARG00000010097	f9a	18.2327	1.27742	2.42405	0.412532	0.56346	2.2671	0.023384	0.0710048	ENSG00000101981	F9	ENSG00000101981	F9
ENSDARG00000009074	cbr4	15.1605	1.27729	2.42384	0.412568	0.323111	3.95311	7.71411e-05	0.000596648	ENSG00000145439	CBR4	ENSG00000145439	CBR4
ENSDARG00000076360	rpl37	26.3864	1.2763	2.42217	0.412853	0.279543	4.56567	4.979e-06	5.73901e-05	ENSG00000106603	COA1	ENSG00000106603	COA1
ENSDARG00000104649	si:dkey-40c23.3	25.254	1.27581	2.42134	0.412994	0.426557	2.99094	0.00278117	0.0123275	ENSG00000163840	DTX3L	ENSG00000163840	DTX3L
ENSDARG00000074933	polg2	11.4476	1.27352	2.4175	0.413651	0.384759	3.3099	0.000933279	0.00494273	ENSG00000256525	POLG2	ENSG00000256525	POLG2
ENSDARG00000091031	si:ch211-153a8.4	32.3677	1.27315	2.41689	0.413755	0.41086	3.09875	0.00194339	0.0091474	ENSG00000131351	HAUS8	ENSG00000131351	HAUS8
ENSDARG00000025326	myl12.2	107.239	1.27313	2.41686	0.413761	0.245387	5.18827	2.12258e-07	3.81246e-06
ENSDARG00000045017	pdrg1	17.2094	1.27257	2.41592	0.413922	0.350008	3.63584	0.00027708	0.00177959	ENSG00000088356	PDRG1	ENSG00000088356	PDRG1
ENSDARG00000096007	znf1067	14.0906	1.27225	2.41538	0.414014	0.394095	3.22828	0.00124535	0.00631454
ENSDARG00000002754	pdcd2l	15.6281	1.2721	2.41512	0.414058	0.335241	3.79457	0.0001479	0.00104022	ENSG00000266953	AC092073.1
ENSDARG00000076718	prkra	37.6256	1.27181	2.41464	0.414141	0.264768	4.80347	1.55936e-06	2.13618e-05	ENSG00000180228	PRKRA	ENSG00000180228	PRKRA
ENSDARG00000105037	snrpf	51.8207	1.27165	2.41437	0.414187	0.311161	4.08678	4.37397e-05	0.000370696	ENSG00000139343	SNRPF	ENSG00000139343	SNRPF
ENSDARG00000104809	top1mt	13.0803	1.27089	2.4131	0.414405	0.451407	2.81539	0.00487176	0.019655	ENSG00000184428	TOP1MT	ENSG00000184428	TOP1MT
ENSDARG00000103996	spdl1	70.0289	1.26983	2.41134	0.414708	0.298955	4.24758	2.16097e-05	0.000203086	ENSG00000040275	SPDL1	ENSG00000040275	SPDL1
ENSDARG00000056781	zanl	5347	1.26914	2.41018	0.414908	0.426642	2.97471	0.00293263	0.0128912	ENSG00000146839	ZAN	ENSG00000146839	ZAN
ENSDARG00000036445	serpinh2	37.8459	1.26838	2.40892	0.415125	0.233971	5.42111	5.92299e-08	1.26608e-06
ENSDARG00000105195	dnajc21	91.0217	1.26797	2.40822	0.415244	0.247588	5.12129	3.03454e-07	5.24224e-06	ENSG00000168724	DNAJC21	ENSG00000168724	DNAJC21
ENSDARG00000071426	lrrc59	143.618	1.26674	2.40617	0.415598	0.21155	5.98789	2.12578e-09	7.25392e-08	ENSG00000108829	LRRC59	ENSG00000108829	LRRC59
ENSDARG00000087674	si:ch1073-127d16.1	22.6784	1.26661	2.40595	0.415636	0.339613	3.72956	0.000191813	0.0012964
ENSDARG00000105010	lztfl1	38.6065	1.26585	2.40468	0.415855	0.243957	5.1888	2.11655e-07	3.80887e-06	ENSG00000163818	LZTFL1	ENSG00000163818	LZTFL1
ENSDARG00000016773	cishb	12.8957	1.26552	2.40415	0.415948	0.494579	2.55879	0.0105037	0.0369313	ENSG00000114737	CISH	ENSG00000114737	CISH
ENSDARG00000046013	rasl11a	17.4116	1.26435	2.40219	0.416286	0.497789	2.53994	0.0110872	0.0386681	ENSG00000122035	RASL11A	ENSG00000122035	RASL11A
ENSDARG00000058219	tubd1	33.7531	1.26369	2.40109	0.416478	0.372538	3.39211	0.000693578	0.00386393	ENSG00000108423	TUBD1	ENSG00000108423	TUBD1
ENSDARG00000024818	rilpl2	42.3901	1.26352	2.40082	0.416525	0.234914	5.37867	7.50394e-08	1.54349e-06	ENSG00000150977	RILPL2	ENSG00000150977	RILPL2
ENSDARG00000094537	si:ch211-137i24.12	8.65205	1.26352	2.40081	0.416526	0.478165	2.64243	0.00823126	0.0302885
ENSDARG00000015889	zc3h15	243.458	1.2629	2.39978	0.416705	0.191146	6.60701	3.92147e-11	2.2945e-09	ENSG00000065548	ZC3H15	ENSG00000065548	ZC3H15
ENSDARG00000103957	aamdc	20.2678	1.26146	2.39739	0.41712	0.518996	2.43059	0.0150745	0.049389	ENSG00000087884	AAMDC	ENSG00000087884	AAMDC
ENSDARG00000019332		151.065	1.26141	2.3973	0.417136	0.201008	6.27543	3.48665e-10	1.5464e-08	ENSG00000065518	NDUFB4	ENSG00000065518	NDUFB4
ENSDARG00000045683	ccdc87	24.5803	1.26124	2.39702	0.417185	0.434643	2.90178	0.00371047	0.01564
ENSDARG00000098391	psmg3	25.6507	1.26092	2.39648	0.417279	0.292711	4.30771	1.64953e-05	0.000160256	ENSG00000157778	PSMG3	ENSG00000157778	PSMG3
ENSDARG00000071090	actn2b	22.4973	1.26025	2.39537	0.417471	0.349872	3.60204	0.000315731	0.00199139	ENSG00000077522	ACTN2	ENSG00000077522	ACTN2
ENSDARG00000014329	npm1a	1024.13	1.25894	2.39319	0.417852	0.178266	7.06211	1.6399e-12	1.54528e-10	ENSG00000181163	NPM1	ENSG00000181163	NPM1
ENSDARG00000038072	ptx4	10.9324	1.25845	2.39238	0.417993	0.32542	3.86715	0.000110113	0.000807632	ENSG00000251692	PTX4	ENSG00000251692	PTX4
ENSDARG00000030176	ITGB1BP2	37.5797	1.25835	2.39222	0.418021	0.52309	2.40561	0.0161454	0.0523104	ENSG00000147166	ITGB1BP2	ENSG00000147166	ITGB1BP2
ENSDARG00000042520		151.214	1.25818	2.39194	0.418071	0.332546	3.78348	0.000154648	0.00108144	ENSG00000253797	UTP14C
ENSDARG00000077471	hmces	27.0755	1.25773	2.3912	0.418201	0.335889	3.74448	0.000180764	0.00123163	ENSG00000183624	HMCES	ENSG00000183624	HMCES
ENSDARG00000102583	il4r.1	29.4033	1.25717	2.39026	0.418365	0.410611	3.06169	0.00220088	0.0101169
ENSDARG00000063212	prmt2	19.7049	1.25709	2.39013	0.418387	0.398478	3.15473	0.00160644	0.00779439	ENSG00000160310	PRMT2	ENSG00000160310	PRMT2
ENSDARG00000011418	sigmar1	144.468	1.25693	2.38987	0.418433	0.19387	6.48338	8.96915e-11	4.65609e-09	ENSG00000147955	SIGMAR1	ENSG00000147955	SIGMAR1
ENSDARG00000075057	si:dkeyp-33b5.4	28.7352	1.25672	2.38951	0.418496	0.226364	5.55174	2.82833e-08	6.67995e-07	ENSG00000100890	KIAA0391
ENSDARG00000016375	asns	109.626	1.25651	2.38917	0.418555	0.245417	5.11989	3.05713e-07	5.27247e-06	ENSG00000070669	ASNS	ENSG00000070669	ASNS
ENSDARG00000089489	fam83e	26.674	1.25565	2.38775	0.418804	0.578	2.17241	0.029825	0.086561	ENSG00000105523	FAM83E	ENSG00000105523	FAM83E
ENSDARG00000053070	gosr2	117.339	1.25517	2.38695	0.418945	0.238118	5.27121	1.35529e-07	2.5987e-06	ENSG00000108433	GOSR2
ENSDARG00000067981	zgc:103697	38.2587	1.25375	2.3846	0.419358	0.278842	4.49626	6.91596e-06	7.64001e-05	ENSG00000018610	CXorf56	ENSG00000018610	CXorf56
ENSDARG00000053019	rnft2	6.78824	1.25353	2.38423	0.419422	0.376041	3.33348	0.000857661	0.00460584	ENSG00000135119	RNFT2	ENSG00000135119	RNFT2
ENSDARG00000034605	zgc:153169	33.9726	1.25259	2.38268	0.419695	0.246556	5.08033	3.76779e-07	6.25338e-06
ENSDARG00000070437	rpl22	757.21	1.2519	2.38155	0.419895	0.239262	5.23235	1.67365e-07	3.09797e-06	ENSG00000116251	RPL22	ENSG00000116251	RPL22
ENSDARG00000041530	ppih	53.577	1.25083	2.37979	0.420206	0.224904	5.56163	2.67264e-08	6.40722e-07	ENSG00000171960	PPIH	ENSG00000171960	PPIH
ENSDARG00000069453	zgc:113314	7.62848	1.2506	2.3794	0.420274	0.483869	2.58458	0.00974981	0.034693
ENSDARG00000077544	toe1	56.0673	1.25047	2.3792	0.42031	0.273612	4.57025	4.87135e-06	5.62745e-05	ENSG00000132773	TOE1	ENSG00000132773	TOE1
ENSDARG00000096714	si:dkey-66i24.7	17.6601	1.24998	2.37838	0.420454	0.232294	5.38101	7.40687e-08	1.52655e-06
ENSDARG00000041736	hsdl1	11.3623	1.24953	2.37764	0.420585	0.427572	2.92239	0.00347356	0.0147767	ENSG00000103160	HSDL1	ENSG00000103160	HSDL1
ENSDARG00000038635	magoh	104.272	1.24935	2.37735	0.420637	0.199416	6.26507	3.72657e-10	1.62845e-08	ENSG00000111196	MAGOHB
ENSDARG00000029497	tfcp2l1	48.8479	1.24903	2.37682	0.42073	0.574153	2.17544	0.0295973	0.0860178	ENSG00000115112	TFCP2L1	ENSG00000115112	TFCP2L1
ENSDARG00000105295	CABZ01084612.1	49.9169	1.24877	2.37638	0.420808	0.506922	2.46343	0.0137615	0.0459114
ENSDARG00000054984	zbtb41	28.684	1.24858	2.37608	0.420861	0.372412	3.35269	0.000800289	0.00434962	ENSG00000177888	ZBTB41	ENSG00000177888	ZBTB41
ENSDARG00000075864	igsf9a	139.906	1.24852	2.37598	0.420878	0.268069	4.65748	3.20101e-06	3.92555e-05	ENSG00000085552	IGSF9	ENSG00000085552	IGSF9
ENSDARG00000091640	si:ch73-352p4.5	55.1471	1.24791	2.37497	0.421058	0.496482	2.5135	0.0119538	0.0410273
ENSDARG00000103237	si:ch73-299h12.8	5.79358	1.2472	2.37381	0.421264	0.571787	2.18124	0.029166	0.0850599
ENSDARG00000071212	p3h1	56.241	1.24662	2.37285	0.421435	0.269811	4.62035	3.83102e-06	4.60278e-05	ENSG00000117385	P3H1	ENSG00000117385	P3H1
ENSDARG00000035327	ckma	10188.5	1.24661	2.37283	0.421439	0.533636	2.33606	0.0194881	0.0611045	ENSG00000104879	CKM	ENSG00000104879	CKM
ENSDARG00000075129	mrps11	77.0412	1.24658	2.37278	0.421446	0.228575	5.4537	4.93314e-08	1.08127e-06	ENSG00000181991	MRPS11	ENSG00000181991	MRPS11
ENSDARG00000040695	fkbp14	47.0576	1.24591	2.37168	0.421641	0.182086	6.84243	7.78588e-12	5.69855e-10	ENSG00000106080	FKBP14	ENSG00000106080	FKBP14
ENSDARG00000030177	uchl3	111.672	1.24547	2.37097	0.421769	0.200857	6.20082	5.61707e-10	2.33159e-08	ENSG00000118939	UCHL3	ENSG00000118939	UCHL3
ENSDARG00000078754	gra	60.0355	1.24538	2.37082	0.421796	0.397908	3.12983	0.00174909	0.00836693
ENSDARG00000018494	smn1	66.7599	1.24517	2.37046	0.421859	0.386384	3.22262	0.00127026	0.00642041	ENSG00000205571	SMN2
ENSDARG00000099955	gb:eb993102	29.385	1.24514	2.37042	0.421867	0.329928	3.77398	0.000160666	0.00111524
ENSDARG00000043857	ufm1	102.719	1.24507	2.3703	0.421887	0.190709	6.52864	6.63675e-11	3.59861e-09	ENSG00000120686	UFM1	ENSG00000120686	UFM1
ENSDARG00000032431	mpv17	8.02798	1.24498	2.37015	0.421915	0.426893	2.91637	0.00354135	0.0150188	ENSG00000115204	MPV17	ENSG00000115204	MPV17
ENSDARG00000020798	necap1	28.0348	1.2441	2.36871	0.422172	0.363235	3.42505	0.000614688	0.00349781	ENSG00000089818	NECAP1	ENSG00000089818	NECAP1
ENSDARG00000096631	MED9	17.2005	1.24376	2.36814	0.422272	0.296834	4.19007	2.78867e-05	0.000252787	ENSG00000141026	MED9	ENSG00000141026	MED9
ENSDARG00000103977	terf2ip	68.9142	1.24258	2.36621	0.422618	0.381118	3.26034	0.00111279	0.00574648	ENSG00000166848	TERF2IP	ENSG00000166848	TERF2IP
ENSDARG00000014085	atp6v1e1a	34.9516	1.24255	2.36616	0.422626	0.278212	4.46618	7.96271e-06	8.59467e-05	ENSG00000131100	ATP6V1E1
ENSDARG00000076659	cdca7b	141.492	1.24241	2.36593	0.422666	0.518137	2.39784	0.0164921	0.0532869	ENSG00000164649	CDCA7L	ENSG00000164649	CDCA7L
ENSDARG00000073705	rbfa	38.4181	1.24192	2.36513	0.422809	0.346277	3.58649	0.000335158	0.00209037	ENSG00000101546	RBFA	ENSG00000101546	RBFA
ENSDARG00000059792	trpm5	7.63679	1.24191	2.36511	0.422813	0.439509	2.82567	0.00471819	0.0191286	ENSG00000070985	TRPM5	ENSG00000070985	TRPM5
ENSDARG00000101474	snapc3	53.7123	1.24126	2.36405	0.423002	0.232937	5.32876	9.88868e-08	1.9767e-06	ENSG00000164975	SNAPC3	ENSG00000164975	SNAPC3
ENSDARG00000003570	hsp90b1	1926.65	1.24123	2.364	0.423012	0.197365	6.289	3.19515e-10	1.445e-08	ENSG00000166598	HSP90B1	ENSG00000166598	HSP90B1
ENSDARG00000099677	bambib	37.0282	1.24088	2.36343	0.423115	0.423847	2.92766	0.00341524	0.0145878	ENSG00000095739	BAMBI	ENSG00000095739	BAMBI
ENSDARG00000025346	znf277	44.8187	1.24037	2.36258	0.423266	0.264733	4.68534	2.795e-06	3.49173e-05	ENSG00000198839	ZNF277	ENSG00000198839	ZNF277
ENSDARG00000044194	tcta	29.4301	1.23978	2.36162	0.423438	0.244745	5.06558	4.07151e-07	6.66666e-06	ENSG00000145022	TCTA	ENSG00000145022	TCTA
ENSDARG00000091161	rpz	38.1956	1.23955	2.36126	0.423503	0.481214	2.57589	0.00999816	0.0353943
ENSDARG00000037261	mtap	81.1167	1.23931	2.36085	0.423576	0.18891	6.56033	5.36906e-11	2.97351e-09	ENSG00000264545	AL359922.1
ENSDARG00000103594	npm3	87.5117	1.23923	2.36072	0.423599	0.218403	5.67403	1.39475e-08	3.62479e-07	ENSG00000107833	NPM3	ENSG00000107833	NPM3
ENSDARG00000007323	chmp4bb	134.005	1.23922	2.36071	0.423602	0.251138	4.93442	8.03886e-07	1.19447e-05	ENSG00000101421	CHMP4B	ENSG00000101421	CHMP4B
ENSDARG00000014274	rfc2	74.9355	1.2388	2.36002	0.423725	0.2906	4.2629	2.01788e-05	0.000191112	ENSG00000049541	RFC2	ENSG00000049541	RFC2
ENSDARG00000101431	gas8	63.4806	1.23842	2.3594	0.423836	0.330078	3.7519	0.000175498	0.00119962	ENSG00000141013	GAS8	ENSG00000141013	GAS8
ENSDARG00000063446	iba57	60.2904	1.23728	2.35754	0.424171	0.234555	5.27501	1.32747e-07	2.55064e-06	ENSG00000181873	IBA57	ENSG00000181873	IBA57
ENSDARG00000037930	rnf113a	30.0839	1.23678	2.35672	0.424319	0.280756	4.40517	1.05699e-05	0.000109467	ENSG00000139797	RNF113B
ENSDARG00000101063	CABZ01058650.1	58.0575	1.2367	2.3566	0.424341	0.199288	6.2056	5.44877e-10	2.27083e-08
ENSDARG00000058445	zgc:136472	77.2122	1.23633	2.35598	0.424452	0.235299	5.25428	1.48603e-07	2.79626e-06	ENSG00000169340	PDILT	ENSG00000169340	PDILT
ENSDARG00000020363	snrnp25	19.236	1.23521	2.35416	0.42478	0.321848	3.83787	0.000124106	0.000895792	ENSG00000161981	SNRNP25	ENSG00000161981	SNRNP25
ENSDARG00000062967	kcng4a	8.91518	1.23495	2.35373	0.424857	0.482252	2.5608	0.0104432	0.0367778	ENSG00000168418	KCNG4	ENSG00000168418	KCNG4
ENSDARG00000016399	riok1	70.4063	1.23449	2.35298	0.424994	0.259465	4.75781	1.95702e-06	2.58519e-05	ENSG00000124784	RIOK1	ENSG00000124784	RIOK1
ENSDARG00000074820	si:dkey-253d23.9	5.60467	1.23394	2.35209	0.425154	0.568484	2.17059	0.0299625	0.0868233
ENSDARG00000058679	zgc:114104	51.5606	1.23359	2.35151	0.425259	0.375129	3.28843	0.00100746	0.00528026	ENSG00000166432	ZMAT1	ENSG00000166432	ZMAT1
ENSDARG00000079391	mrpl42	28.9185	1.23331	2.35106	0.425339	0.278885	4.4223	9.76559e-06	0.000102366	ENSG00000198015	MRPL42	ENSG00000198015	MRPL42
ENSDARG00000019223	arglu1a	200.229	1.23298	2.35051	0.425439	0.24246	5.08528	3.67091e-07	6.12696e-06	ENSG00000134884	ARGLU1	ENSG00000134884	ARGLU1
ENSDARG00000053452	pop5	19.2851	1.23247	2.34969	0.425588	0.308435	3.99587	6.44558e-05	0.000511923	ENSG00000167272	POP5	ENSG00000167272	POP5
ENSDARG00000010047	neu3.2	47.5949	1.23238	2.34954	0.425615	0.202886	6.07424	1.24573e-09	4.6408e-08	ENSG00000162139	NEU3	ENSG00000162139	NEU3
ENSDARG00000060027	nom1	60.7572	1.23187	2.34871	0.425765	0.242353	5.08296	3.71602e-07	6.18232e-06	ENSG00000146909	NOM1	ENSG00000146909	NOM1
ENSDARG00000070894	abhd6b	6.84326	1.23068	2.34678	0.426115	0.425863	2.88986	0.00385409	0.0161566	ENSG00000163686	ABHD6	ENSG00000163686	ABHD6
ENSDARG00000032285	zgc:113294	10.8746	1.2306	2.34664	0.426141	0.404553	3.04187	0.00235111	0.01071
ENSDARG00000096346	si:ch211-85n16.3	21.2015	1.23051	2.34651	0.426165	0.382243	3.2192	0.0012855	0.00647849
ENSDARG00000052082	gabarapb	188.361	1.23038	2.34629	0.426205	0.194773	6.31698	2.66722e-10	1.24428e-08	ENSG00000170296	GABARAP	ENSG00000170296	GABARAP
ENSDARG00000099197	actc1b	67959	1.22983	2.3454	0.426367	0.476441	2.58129	0.00984317	0.034944
ENSDARG00000044298	phax	152.522	1.22944	2.34477	0.426482	0.442926	2.77573	0.00550775	0.0217922	ENSG00000164902	PHAX	ENSG00000164902	PHAX
ENSDARG00000033450	nkap	127.121	1.22941	2.34471	0.426492	0.245784	5.00198	5.67438e-07	8.8504e-06	ENSG00000189134	NKAPL
ENSDARG00000035686	mon1ba	4.24754	1.22869	2.34355	0.426704	0.532794	2.30613	0.0211031	0.0652596	ENSG00000103111	MON1B	ENSG00000103111	MON1B
ENSDARG00000069692	col7a1l	22.1219	1.22821	2.34276	0.426848	0.434548	2.8264	0.0047074	0.0190923
ENSDARG00000057884	zgc:114174	11.5649	1.22741	2.34146	0.427084	0.37984	3.23138	0.00123194	0.00625727	ENSG00000132879	FBXO44
ENSDARG00000036903	irak1bp1	32.8684	1.2269	2.34063	0.427235	0.325189	3.77288	0.000161375	0.00111941	ENSG00000146243	IRAK1BP1	ENSG00000146243	IRAK1BP1
ENSDARG00000062080	shc2	7.64975	1.22654	2.34005	0.427342	0.515763	2.3781	0.0174019	0.0557966	ENSG00000129946	SHC2	ENSG00000129946	SHC2
ENSDARG00000056653	fhl1b	38.0946	1.22572	2.33873	0.427583	0.302039	4.05816	4.94614e-05	0.000409633	ENSG00000022267	FHL1	ENSG00000022267	FHL1
ENSDARG00000042908	hsh2d	19.8506	1.22557	2.33848	0.427629	0.371865	3.29574	0.000981638	0.00515927	ENSG00000196684	HSH2D	ENSG00000196684	HSH2D
ENSDARG00000060501	dpcd	31.5168	1.22527	2.338	0.427716	0.333718	3.67158	0.000241051	0.00158504	ENSG00000166171	DPCD	ENSG00000166171	DPCD
ENSDARG00000058710	terf1	77.3896	1.22474	2.33714	0.427874	0.474475	2.58126	0.00984397	0.034944	ENSG00000147601	TERF1	ENSG00000147601	TERF1
ENSDARG00000061228	pfdn4	50.3549	1.22432	2.33646	0.427998	0.21877	5.5964	2.18851e-08	5.40293e-07	ENSG00000101132	PFDN4	ENSG00000101132	PFDN4
ENSDARG00000018241	mfap1	113.671	1.22404	2.33601	0.428081	0.237294	5.15834	2.49143e-07	4.39565e-06	ENSG00000140259	MFAP1	ENSG00000140259	MFAP1
ENSDARG00000035515	tm2d2	57.9744	1.22404	2.33601	0.428081	0.295136	4.14739	3.36291e-05	0.000296661	ENSG00000169490	TM2D2	ENSG00000169490	TM2D2
ENSDARG00000003257	zgc:101559	20.832	1.22342	2.335	0.428265	0.335576	3.64574	0.000266621	0.00172633
ENSDARG00000093999	si:ch73-376l24.6	82.2971	1.22273	2.33388	0.428471	0.463565	2.63767	0.00834781	0.0306249	ENSG00000125482	TTF1	ENSG00000125482	TTF1
ENSDARG00000038309	dnajc15	39.6513	1.22248	2.33348	0.428545	0.225406	5.42346	5.84555e-08	1.2547e-06	ENSG00000120675	DNAJC15	ENSG00000120675	DNAJC15
ENSDARG00000103878	anpepb	2986.58	1.2224	2.33335	0.428569	0.471334	2.59349	0.00950078	0.0339937	ENSG00000166825	ANPEP	ENSG00000166825	ANPEP
ENSDARG00000038397	rpap2	32.1262	1.22239	2.33332	0.428574	0.272164	4.49136	7.07687e-06	7.78456e-05	ENSG00000122484	RPAP2	ENSG00000122484	RPAP2
ENSDARG00000104783	si:ch73-221f6.4	36.8266	1.22171	2.33222	0.428775	0.363232	3.36343	0.000769798	0.00421486
ENSDARG00000038900	acadm	740.027	1.22062	2.33046	0.4291	0.129845	9.40057	5.42703e-21	5.91632e-18	ENSG00000117054	ACADM	ENSG00000117054	ACADM
ENSDARG00000099279	ift27	29.7432	1.22055	2.33036	0.429118	0.235122	5.19114	2.09013e-07	3.7646e-06	ENSG00000100360	IFT27	ENSG00000100360	IFT27
ENSDARG00000038835	ppid	169.912	1.21932	2.32837	0.429485	0.177773	6.85887	6.9405e-12	5.15263e-10	ENSG00000171497	PPID	ENSG00000171497	PPID
ENSDARG00000103021	fadd	27.2923	1.21862	2.32725	0.429692	0.246712	4.93947	7.8336e-07	1.16732e-05	ENSG00000168040	FADD	ENSG00000168040	FADD
ENSDARG00000070161	vamp3	157.592	1.21833	2.32677	0.42978	0.16894	7.2116	5.52968e-13	5.88031e-11	ENSG00000049245	VAMP3	ENSG00000049245	VAMP3
ENSDARG00000043727	cwc27	50.3442	1.21815	2.32649	0.429833	0.274714	4.43426	9.23902e-06	9.74378e-05	ENSG00000153015	CWC27	ENSG00000153015	CWC27
ENSDARG00000090152	anapc10	41.5504	1.2177	2.32576	0.429967	0.402621	3.02443	0.00249101	0.011241	ENSG00000164162	ANAPC10	ENSG00000164162	ANAPC10
ENSDARG00000070560	nap1l4a	256.502	1.21757	2.32554	0.430007	0.18656	6.52642	6.73587e-11	3.63803e-09	ENSG00000205531	NAP1L4	ENSG00000205531	NAP1L4
ENSDARG00000007531	zcchc9	54.9621	1.2171	2.32478	0.430147	0.298248	4.08082	4.48762e-05	0.000378895	ENSG00000131732	ZCCHC9	ENSG00000131732	ZCCHC9
ENSDARG00000012422	col11a2	363.563	1.21673	2.32419	0.430258	0.353856	3.43848	0.000584997	0.00335466	ENSG00000204248	COL11A2	ENSG00000204248	COL11A2
ENSDARG00000012325	zgc:110269	18.1814	1.21645	2.32373	0.430342	0.255163	4.76732	1.86694e-06	2.48202e-05	ENSG00000178295	GEN1	ENSG00000178295	GEN1
ENSDARG00000043402		51.8194	1.21637	2.32361	0.430365	0.188565	6.45067	1.11357e-10	5.66719e-09	ENSG00000162910	MRPL55	ENSG00000162910	MRPL55
ENSDARG00000035551	iqcd	42.4268	1.2163	2.3235	0.430385	0.508783	2.39061	0.0168205	0.0542009	ENSG00000166578	IQCD	ENSG00000166578	IQCD
ENSDARG00000088885	si:ch1073-340i21.3	13.3561	1.21613	2.32323	0.430436	0.504364	2.41121	0.0158995	0.0516428
ENSDARG00000099817	tusc2a	5.80444	1.21562	2.3224	0.430589	0.526798	2.30756	0.0210237	0.0650559	ENSG00000114383	TUSC2	ENSG00000114383	TUSC2
ENSDARG00000069286	ndufaf2	19.883	1.2145	2.3206	0.430924	0.367073	3.3086	0.000937648	0.00495953	ENSG00000164182	NDUFAF2	ENSG00000164182	NDUFAF2
ENSDARG00000070864	bcl6a	40.6158	1.21447	2.32056	0.430931	0.343979	3.53065	0.000414539	0.00249748	ENSG00000113916	BCL6	ENSG00000113916	BCL6
ENSDARG00000007971	cks1b	31.0901	1.21423	2.32017	0.431003	0.340306	3.56805	0.000359649	0.00221445	ENSG00000173207	CKS1B	ENSG00000173207	CKS1B
ENSDARG00000052816	shmt1	398.75	1.21357	2.3191	0.431201	0.174466	6.95588	3.50368e-12	2.91453e-10	ENSG00000176974	SHMT1	ENSG00000176974	SHMT1
ENSDARG00000076119	emid1	46.0153	1.21321	2.31853	0.431308	0.550982	2.20191	0.0276719	0.0815666	ENSG00000186998	EMID1	ENSG00000186998	EMID1
ENSDARG00000067545	adam19b	35.0124	1.21171	2.31613	0.431755	0.45901	2.63984	0.00829447	0.0304616	ENSG00000135074	ADAM19	ENSG00000135074	ADAM19
ENSDARG00000053857	ccdc187	55.2991	1.21121	2.31532	0.431905	0.285031	4.24941	2.14336e-05	0.000201835
ENSDARG00000036924	tatdn1	14.0353	1.21093	2.31486	0.431991	0.27485	4.40577	1.05408e-05	0.00010922	ENSG00000147687	TATDN1	ENSG00000147687	TATDN1
ENSDARG00000079202	parp2	79.1107	1.21082	2.31469	0.432024	0.203271	5.95665	2.57462e-09	8.51887e-08	ENSG00000129484	PARP2	ENSG00000129484	PARP2
ENSDARG00000103900	sept9b	36.5883	1.2099	2.31321	0.432299	0.480803	2.51641	0.0118556	0.0407375	ENSG00000184640	SEPT9	ENSG00000184640	SEPT9
ENSDARG00000062855	plekhg7	26.1984	1.20939	2.31239	0.432452	0.40056	3.01924	0.0025341	0.0114106	ENSG00000187510	PLEKHG7	ENSG00000187510	PLEKHG7
ENSDARG00000100261	si:ch1073-266p11.2	48.8304	1.20926	2.31219	0.43249	0.30938	3.90866	9.28092e-05	0.000699306	ENSG00000212916	MAP10	ENSG00000212916	MAP10
ENSDARG00000013789	sim1b	37.1219	1.2089	2.31161	0.4326	0.455866	2.65187	0.00800478	0.0296183	ENSG00000112246	SIM1	ENSG00000112246	SIM1
ENSDARG00000012076	apoa1a	12540.8	1.20863	2.31118	0.432679	0.444762	2.71748	0.00657816	0.0252088	ENSG00000118137	APOA1	ENSG00000118137	APOA1
ENSDARG00000016112	bbs12	31.7092	1.20813	2.31039	0.432828	0.486866	2.48145	0.0130848	0.0441626	ENSG00000181004	BBS12	ENSG00000181004	BBS12
ENSDARG00000023003	ccdc12	33.8799	1.20669	2.30807	0.433262	0.212879	5.66841	1.44129e-08	3.72237e-07	ENSG00000160799	CCDC12	ENSG00000160799	CCDC12
ENSDARG00000011239	ppp1r14aa	41.9066	1.2061	2.30714	0.433438	0.307251	3.92546	8.65641e-05	0.000657982	ENSG00000167641	PPP1R14A	ENSG00000167641	PPP1R14A
ENSDARG00000003841	usb1	15.942	1.20587	2.30676	0.433508	0.374186	3.22264	0.00127013	0.00642041	ENSG00000103005	USB1	ENSG00000103005	USB1
ENSDARG00000035326	nccrp1	147.466	1.20552	2.3062	0.433613	0.176873	6.81573	9.37865e-12	6.60748e-10	ENSG00000188505	NCCRP1	ENSG00000188505	NCCRP1
ENSDARG00000052103	dtymk	27.8878	1.20546	2.30611	0.433631	0.388544	3.1025	0.00191891	0.00905591	ENSG00000168393	DTYMK	ENSG00000168393	DTYMK
ENSDARG00000030805	znhit2	32.2392	1.20528	2.30582	0.433685	0.457899	2.6322	0.00848346	0.0310009	ENSG00000174276	ZNHIT2	ENSG00000174276	ZNHIT2
ENSDARG00000023672	timm8a	36.0416	1.20461	2.30474	0.433888	0.240423	5.01036	5.43287e-07	8.51589e-06	ENSG00000126953	TIMM8A	ENSG00000126953	TIMM8A
ENSDARG00000069037	akip1	60.4397	1.2044	2.30441	0.433951	0.366929	3.28237	0.00102939	0.00537341	ENSG00000166452	AKIP1	ENSG00000166452	AKIP1
ENSDARG00000068883	tspan13a	282.939	1.20195	2.3005	0.434688	0.255322	4.70758	2.50675e-06	3.18737e-05	ENSG00000106537	TSPAN13	ENSG00000106537	TSPAN13
ENSDARG00000032985	mrpl27	31.5065	1.20171	2.30012	0.434761	0.253163	4.74677	2.06692e-06	2.70791e-05	ENSG00000108826	MRPL27	ENSG00000108826	MRPL27
ENSDARG00000009218	mars2	24.5736	1.20021	2.29773	0.435212	0.212931	5.6366	1.73436e-08	4.3863e-07	ENSG00000247626	MARS2	ENSG00000247626	MARS2
ENSDARG00000089230	si:ch211-253b8.2	55.1744	1.19951	2.29662	0.435422	0.319741	3.75152	0.000175765	0.00120073
ENSDARG00000069099	tmco1	98.2406	1.19946	2.29654	0.435438	0.213756	5.61136	2.00748e-08	4.97379e-07	ENSG00000143183	TMCO1	ENSG00000143183	TMCO1
ENSDARG00000103173	stx8	23.0557	1.1989	2.29564	0.435608	0.316624	3.7865	0.000152786	0.00107059	ENSG00000170310	STX8	ENSG00000170310	STX8
ENSDARG00000098664	si:dkeyp-53d3.3	7.0037	1.19863	2.29522	0.435688	0.454545	2.637	0.00836432	0.0306643
ENSDARG00000086881	IER2 (1 of many)	5.77835	1.19861	2.29519	0.435695	0.535497	2.23832	0.0252005	0.0754773	ENSG00000160888	IER2	ENSG00000160888	IER2
ENSDARG00000036291	nucb2b	146.569	1.19832	2.29473	0.435781	0.267678	4.47673	7.57943e-06	8.23245e-05	ENSG00000070081	NUCB2	ENSG00000070081	NUCB2
ENSDARG00000042630	hebp2	82.5086	1.19825	2.29461	0.435804	0.205545	5.82962	5.55545e-09	1.62863e-07	ENSG00000051620	HEBP2	ENSG00000051620	HEBP2
ENSDARG00000041140	ddb2	118.076	1.19804	2.29428	0.435867	0.204484	5.85882	4.66155e-09	1.41162e-07	ENSG00000134574	DDB2	ENSG00000134574	DDB2
ENSDARG00000086324	si:dkey-274m17.3	9.50807	1.19786	2.294	0.435921	0.385832	3.10462	0.00190523	0.00900366	ENSG00000114405	C3orf14	ENSG00000114405	C3orf14
ENSDARG00000090156	pttg1ipa	12.7655	1.19674	2.29222	0.436259	0.372687	3.21112	0.00132218	0.00663106	ENSG00000183255	PTTG1IP	ENSG00000183255	PTTG1IP
ENSDARG00000103690	vipas39	36.9627	1.19627	2.29146	0.436402	0.198293	6.03284	1.61105e-09	5.71711e-08	ENSG00000151445	VIPAS39	ENSG00000151445	VIPAS39
ENSDARG00000028894	mrgbp	64.5979	1.19626	2.29145	0.436405	0.33952	3.52339	0.000426059	0.00255648	ENSG00000101189	MRGBP	ENSG00000101189	MRGBP
ENSDARG00000034916	hat1	135.214	1.19587	2.29083	0.436523	0.186293	6.41932	1.36885e-10	6.8156e-09	ENSG00000128708	HAT1	ENSG00000128708	HAT1
ENSDARG00000003429	hnrpdl	323.563	1.19561	2.29042	0.436602	0.174874	6.83698	8.08772e-12	5.89863e-10	ENSG00000152795	HNRNPDL	ENSG00000152795	HNRNPDL
ENSDARG00000007217	wdr55	41.7275	1.19544	2.29015	0.436653	0.26729	4.47245	7.7329e-06	8.37966e-05	ENSG00000120314	WDR55	ENSG00000120314	WDR55
ENSDARG00000033604	lrpap1	143.259	1.19529	2.28991	0.436699	0.240829	4.96322	6.93326e-07	1.05054e-05	ENSG00000163956	LRPAP1	ENSG00000163956	LRPAP1
ENSDARG00000025757	tspan35	28.7115	1.19459	2.28879	0.436912	0.483606	2.47017	0.013505	0.0452417
ENSDARG00000006603	csrp1a	86.1498	1.19391	2.28772	0.437116	0.213992	5.57924	2.41573e-08	5.87979e-07	ENSG00000159176	CSRP1	ENSG00000159176	CSRP1
ENSDARG00000101362	mibp	129.874	1.1929	2.28612	0.437422	0.410225	2.90792	0.0036384	0.0153832	ENSG00000077009	NMRK2	ENSG00000077009	NMRK2
ENSDARG00000037967	si:dkey-16l2.16	86.0017	1.19247	2.28544	0.437552	0.451173	2.64305	0.00821619	0.0302546
ENSDARG00000087573	hdac11	12.7808	1.19231	2.28519	0.437601	0.278217	4.28555	1.8229e-05	0.000174723	ENSG00000163517	HDAC11	ENSG00000163517	HDAC11
ENSDARG00000058958	FP340265.1	21.6206	1.1912	2.28342	0.43794	0.533911	2.23107	0.0256763	0.0766215	ENSG00000104228	TRIM35	ENSG00000104228	TRIM35
ENSDARG00000006621	pspc1	44.9534	1.19107	2.28322	0.437978	0.223709	5.32418	1.01407e-07	2.01578e-06	ENSG00000121390	PSPC1	ENSG00000121390	PSPC1
ENSDARG00000096001	si:dkey-240n22.8	3.11743	1.1905	2.28231	0.438152	0.518151	2.29759	0.0215853	0.0664628
ENSDARG00000041811	rps25	1091.47	1.19018	2.28182	0.438247	0.228238	5.21467	1.84141e-07	3.37532e-06	ENSG00000118181	RPS25	ENSG00000118181	RPS25
ENSDARG00000024090	dnajc4	33.0843	1.18985	2.28129	0.438349	0.288884	4.11878	3.80888e-05	0.00032887	ENSG00000110011	DNAJC4	ENSG00000110011	DNAJC4
ENSDARG00000059028	srrd	12.1115	1.18977	2.28116	0.438373	0.469232	2.53557	0.0112264	0.0390549	ENSG00000100104	SRRD	ENSG00000100104	SRRD
ENSDARG00000029479	zgc:86609	84.6999	1.18964	2.28096	0.438411	0.225913	5.26593	1.39483e-07	2.66032e-06
ENSDARG00000037307	gnpda1	140.891	1.18957	2.28085	0.438433	0.231013	5.14937	2.61358e-07	4.58772e-06	ENSG00000113552	GNPDA1	ENSG00000113552	GNPDA1
ENSDARG00000024895	fam50a	49.3781	1.18955	2.28082	0.438439	0.258245	4.60629	4.09908e-06	4.84613e-05	ENSG00000145945	FAM50B
ENSDARG00000020454	psmd8	197.929	1.18888	2.27976	0.438642	0.143786	8.26844	1.35723e-16	3.87206e-14	ENSG00000099341	PSMD8	ENSG00000099341	PSMD8
ENSDARG00000055360	llph	63.064	1.18851	2.27918	0.438755	0.283694	4.18942	2.79672e-05	0.000253295	ENSG00000139233	LLPH	ENSG00000139233	LLPH
ENSDARG00000090418	wdsub1	53.1186	1.18845	2.27908	0.438773	0.221821	5.35772	8.42809e-08	1.70813e-06	ENSG00000196151	WDSUB1	ENSG00000196151	WDSUB1
ENSDARG00000052652	fermt1	47.8792	1.18828	2.27882	0.438824	0.403885	2.94213	0.0032596	0.0140162	ENSG00000101311	FERMT1	ENSG00000101311	FERMT1
ENSDARG00000002339	sgf29	51.5035	1.18766	2.27783	0.439014	0.329168	3.60808	0.000308474	0.00195276	ENSG00000258150	AC133555.3
ENSDARG00000015221	nsrp1	61.026	1.18672	2.27634	0.439302	0.304515	3.89707	9.73622e-05	0.000727774	ENSG00000126653	NSRP1	ENSG00000126653	NSRP1
ENSDARG00000043457	gapdh	5071.1	1.18568	2.27471	0.439616	0.236345	5.01676	5.25511e-07	8.2879e-06	ENSG00000111640	GAPDH	ENSG00000111640	GAPDH
ENSDARG00000042291	dlx6a	12.7448	1.18551	2.27444	0.439669	0.470201	2.52128	0.0116929	0.040307	ENSG00000006377	DLX6	ENSG00000006377	DLX6
ENSDARG00000017441	mylz3	14987.4	1.18512	2.27382	0.439788	0.421683	2.81045	0.00494722	0.0198974	ENSG00000168530	MYL1	ENSG00000168530	MYL1
ENSDARG00000026582	iscub	36.2514	1.18511	2.2738	0.439792	0.249607	4.74788	2.05563e-06	2.69653e-05	ENSG00000136003	ISCU	ENSG00000136003	ISCU
ENSDARG00000015156	fbln2	125.264	1.18502	2.27366	0.43982	0.183129	6.47095	9.73918e-11	5.01065e-09	ENSG00000163520	FBLN2	ENSG00000163520	FBLN2
ENSDARG00000018073	mrps22	73.6643	1.18491	2.27349	0.439852	0.200614	5.90643	3.4961e-09	1.11579e-07	ENSG00000175110	MRPS22	ENSG00000175110	MRPS22
ENSDARG00000089626	ptges3b	130.352	1.18491	2.27349	0.439853	0.213342	5.55403	2.79158e-08	6.63097e-07	ENSG00000110958	PTGES3	ENSG00000110958	PTGES3
ENSDARG00000068265	tomm5	101.908	1.18452	2.27287	0.439972	0.231955	5.10665	3.27912e-07	5.57639e-06	ENSG00000175768	TOMM5
ENSDARG00000039843	znf800b	30.7924	1.18417	2.27232	0.440078	0.250196	4.73297	2.21263e-06	2.86977e-05	ENSG00000048405	ZNF800	ENSG00000048405	ZNF800
ENSDARG00000002506	zgc:92818	76.1293	1.18396	2.27199	0.440142	0.212717	5.56588	2.60828e-08	6.28202e-07	ENSG00000155330	C16orf87	ENSG00000155330	C16orf87
ENSDARG00000017504	si:ch211-1o7.3	15.9861	1.18368	2.27156	0.440226	0.364873	3.2441	0.00117822	0.00603474
ENSDARG00000097521	si:dkey-111k8.5	18.2822	1.18335	2.27103	0.440328	0.456222	2.59381	0.00949202	0.0339683
ENSDARG00000105696	CABZ01021433.1	20.8998	1.18297	2.27044	0.440443	0.348184	3.39755	0.000679915	0.00380007
ENSDARG00000037140	pfkfb1	68.7452	1.1795	2.26498	0.441505	0.216845	5.43937	5.34708e-08	1.15851e-06	ENSG00000158571	PFKFB1	ENSG00000158571	PFKFB1
ENSDARG00000036893	f13a1b	76.2596	1.17918	2.26448	0.441603	0.291303	4.04794	5.16712e-05	0.000425215	ENSG00000124491	F13A1	ENSG00000124491	F13A1
ENSDARG00000104274	si:ch211-204a13.2	43.8922	1.17914	2.26441	0.441615	0.239054	4.93252	8.11775e-07	1.2036e-05	ENSG00000253304	TMEM200B	ENSG00000253304	TMEM200B
ENSDARG00000010051	ufd1l	123.658	1.17851	2.26344	0.441806	0.202116	5.83088	5.51359e-09	1.6199e-07	ENSG00000070010	UFD1	ENSG00000070010	UFD1
ENSDARG00000036481	tcn2	390.422	1.178	2.26263	0.441964	0.296617	3.97145	7.14362e-05	0.000559206	ENSG00000185339	TCN2	ENSG00000185339	TCN2
ENSDARG00000076139	si:dkey-71p21.13	7.18883	1.17766	2.2621	0.442066	0.475707	2.47561	0.0133009	0.0447097
ENSDARG00000011246	krr1	39.0022	1.17735	2.26161	0.442163	0.221421	5.31723	1.05356e-07	2.08428e-06	ENSG00000111615	KRR1	ENSG00000111615	KRR1
ENSDARG00000053990	hmgb2b	607.615	1.1772	2.26137	0.44221	0.180128	6.53535	6.34617e-11	3.45916e-09
ENSDARG00000054950	eef2kmt	13.5846	1.17699	2.26105	0.442273	0.383	3.07308	0.00211861	0.00981773	ENSG00000145002	FAM86B2
ENSDARG00000071679	mydgf	84.2653	1.1769	2.26091	0.442299	0.261591	4.49902	6.8267e-06	7.55852e-05	ENSG00000074842	MYDGF	ENSG00000074842	MYDGF
ENSDARG00000098623	si:dkey-23f9.4	30.891	1.1769	2.26091	0.4423	0.474875	2.47834	0.0131996	0.0445137	ENSG00000198331	HYLS1	ENSG00000198331	HYLS1
ENSDARG00000043339	abraxas2a	58.2655	1.17653	2.26032	0.442415	0.319475	3.68269	0.000230784	0.00152285	ENSG00000163322	ABRAXAS1	ENSG00000163322	ABRAXAS1
ENSDARG00000071772	si:ch211-253p2.2	8.49445	1.17606	2.25959	0.442559	0.430047	2.73472	0.00624324	0.0241397
ENSDARG00000104066	dnaja2	654.789	1.17597	2.25945	0.442586	0.145477	8.08352	6.29257e-16	1.51556e-13	ENSG00000069345	DNAJA2	ENSG00000069345	DNAJA2
ENSDARG00000018260	bmp7a	5.56133	1.17584	2.25924	0.442627	0.536969	2.18976	0.0285414	0.083547	ENSG00000101144	BMP7	ENSG00000101144	BMP7
ENSDARG00000040192	nenf	50.4519	1.17578	2.25915	0.442645	0.212235	5.53998	3.02501e-08	7.03463e-07	ENSG00000117691	NENF	ENSG00000117691	NENF
ENSDARG00000068681	crfb1	20.0483	1.17548	2.25868	0.442736	0.530491	2.21584	0.0267027	0.0792443
ENSDARG00000087835	si:ch211-113p18.3	25.3712	1.17517	2.25819	0.442833	0.269098	4.36706	1.2593e-05	0.000126621
ENSDARG00000035692	rps3a	3649	1.17445	2.25707	0.443052	0.223873	5.24607	1.55381e-07	2.90208e-06	ENSG00000145425	RPS3A	ENSG00000145425	RPS3A
ENSDARG00000054363	si:zfos-464b6.2	76.877	1.17439	2.25698	0.44307	0.249808	4.70118	2.58665e-06	3.27245e-05
ENSDARG00000037350	rpl9	1909.46	1.17405	2.25644	0.443176	0.2375	4.94338	7.67814e-07	1.14994e-05	ENSG00000163682	RPL9	ENSG00000163682	RPL9
ENSDARG00000009864	ddx55	47.8807	1.1738	2.25605	0.443252	0.234055	5.01506	5.30163e-07	8.33177e-06	ENSG00000111364	DDX55	ENSG00000111364	DDX55
ENSDARG00000006786	copz2	50.8507	1.1735	2.25558	0.443345	0.301166	3.89652	9.75837e-05	0.000728905
ENSDARG00000100513		117.34	1.17268	2.2543	0.443598	0.276228	4.24532	2.18281e-05	0.000204674	ENSG00000185088	RPS27L	ENSG00000185088	RPS27L
ENSDARG00000023858	ccdc174	46.2678	1.17251	2.25404	0.443648	0.323738	3.62179	0.000292567	0.00186402	ENSG00000154781	CCDC174	ENSG00000154781	CCDC174
ENSDARG00000056954	si:dkeyp-38g8.5	21.6781	1.17185	2.253	0.443853	0.286482	4.09048	4.30476e-05	0.000365578
ENSDARG00000040157	glt8d1	49.6025	1.17093	2.25157	0.444134	0.269026	4.35249	1.346e-05	0.00013423	ENSG00000016864	GLT8D1	ENSG00000016864	GLT8D1
ENSDARG00000090319	rnf212	12.1434	1.17072	2.25124	0.444199	0.348457	3.35974	0.000780169	0.00426151	ENSG00000178222	RNF212	ENSG00000178222	RNF212
ENSDARG00000091967	ttf1	81.6236	1.1706	2.25105	0.444237	0.443196	2.64127	0.00825971	0.0303711	ENSG00000125482	TTF1	ENSG00000125482	TTF1
ENSDARG00000105278	wu:fa19b12	64.2911	1.17018	2.2504	0.444366	0.471186	2.48348	0.0130107	0.0439553
ENSDARG00000008936	sec11a	92.107	1.16967	2.2496	0.444523	0.225114	5.1959	2.03726e-07	3.6854e-06	ENSG00000140612	SEC11A	ENSG00000140612	SEC11A
ENSDARG00000030537	psmc1a	173.904	1.16926	2.24896	0.444649	0.220351	5.30636	1.11836e-07	2.19569e-06	ENSG00000100764	PSMC1	ENSG00000100764	PSMC1
ENSDARG00000030694	atp6v1e1b	96.0496	1.16906	2.24866	0.444709	0.213791	5.46826	4.54466e-08	1.00472e-06	ENSG00000131100	ATP6V1E1
ENSDARG00000038028	ndufa6	118.502	1.16888	2.24837	0.444767	0.246375	4.7443	2.09226e-06	2.73592e-05	ENSG00000184983	NDUFA6	ENSG00000184983	NDUFA6
ENSDARG00000006392	exosc9	42.0021	1.16882	2.24828	0.444784	0.307998	3.7949	0.0001477	0.00103968	ENSG00000123737	EXOSC9	ENSG00000123737	EXOSC9
ENSDARG00000036993	erbb3b	99.5144	1.16879	2.24823	0.444794	0.429696	2.72004	0.00652736	0.0250326	ENSG00000065361	ERBB3	ENSG00000065361	ERBB3
ENSDARG00000056649	htatsf1	107.467	1.16871	2.24811	0.444818	0.242625	4.81694	1.45775e-06	2.02783e-05	ENSG00000102241	HTATSF1	ENSG00000102241	HTATSF1
ENSDARG00000037091	asah1a	52.5557	1.16849	2.24777	0.444885	0.292811	3.99061	6.59041e-05	0.00052102	ENSG00000104763	ASAH1	ENSG00000104763	ASAH1
ENSDARG00000054907	cox7a3	155.549	1.16829	2.24745	0.444948	0.182295	6.4088	1.46672e-10	7.23335e-09	ENSG00000115944	COX7A2L	ENSG00000115944	COX7A2L
ENSDARG00000086037	jam3a	15.9803	1.16816	2.24724	0.44499	0.34795	3.35725	0.000787211	0.00428979	ENSG00000166086	JAM3	ENSG00000166086	JAM3
ENSDARG00000061371	cdh18a	10.1187	1.16788	2.24682	0.445074	0.359136	3.25193	0.00114626	0.00589436	ENSG00000145526	CDH18	ENSG00000145526	CDH18
ENSDARG00000068557	htr5ab	6.88926	1.16718	2.24572	0.445291	0.416633	2.80146	0.00508719	0.0203733	ENSG00000157219	HTR5A	ENSG00000157219	HTR5A
ENSDARG00000042977	nfil3	26.2864	1.16709	2.24558	0.445319	0.296031	3.94246	8.06495e-05	0.000620309	ENSG00000165030	NFIL3	ENSG00000165030	NFIL3
ENSDARG00000022232	ppan	142.68	1.16691	2.2453	0.445376	0.338651	3.44575	0.000569475	0.00327472	ENSG00000243207	PPAN-P2RY11
ENSDARG00000043865	timm9	71.6133	1.16674	2.24504	0.445427	0.230935	5.05224	4.36667e-07	7.07722e-06	ENSG00000100575	TIMM9	ENSG00000100575	TIMM9
ENSDARG00000005128	rnaseh2b	48.4892	1.16646	2.2446	0.445513	0.243151	4.79726	1.60848e-06	2.19332e-05	ENSG00000136104	RNASEH2B	ENSG00000136104	RNASEH2B
ENSDARG00000035618	coq5	32.322	1.16639	2.2445	0.445534	0.236171	4.93877	7.86166e-07	1.17066e-05	ENSG00000110871	COQ5	ENSG00000110871	COQ5
ENSDARG00000040179	zgc:101562	48.4676	1.16567	2.24337	0.445759	0.308257	3.78147	0.000155906	0.00108895
ENSDARG00000058820	bin1b	62.6256	1.16552	2.24314	0.445804	0.246509	4.72809	2.26641e-06	2.93034e-05	ENSG00000136717	BIN1	ENSG00000136717	BIN1
ENSDARG00000042644	sod2	193.239	1.16519	2.24263	0.445905	0.191406	6.08753	1.14666e-09	4.34201e-08	ENSG00000112096	SOD2	ENSG00000112096	SOD2
ENSDARG00000039338	gadd45gip1	82.4966	1.16479	2.242	0.446031	0.178405	6.52888	6.62615e-11	3.59861e-09	ENSG00000179271	GADD45GIP1	ENSG00000179271	GADD45GIP1
ENSDARG00000104030	taf12	104.468	1.16476	2.24196	0.446038	0.224157	5.19617	2.03435e-07	3.68335e-06	ENSG00000120656	TAF12	ENSG00000120656	TAF12
ENSDARG00000077900	si:ch211-141o9.10	57.6517	1.16462	2.24174	0.446083	0.446765	2.60678	0.00913987	0.0329471
ENSDARG00000023958	rnf181	28.8028	1.16419	2.24107	0.446215	0.278646	4.17801	2.94067e-05	0.000264596	ENSG00000168894	RNF181	ENSG00000168894	RNF181
ENSDARG00000069242	pdia5	227.315	1.16414	2.241	0.44623	0.185414	6.27862	3.41592e-10	1.52487e-08	ENSG00000065485	PDIA5	ENSG00000065485	PDIA5
ENSDARG00000058605	vsig10	89.9148	1.16408	2.2409	0.446248	0.374185	3.11098	0.00186469	0.00884033	ENSG00000176834	VSIG10	ENSG00000176834	VSIG10
ENSDARG00000016307	mrpl46	43.1709	1.16385	2.24054	0.44632	0.226383	5.14106	2.73186e-07	4.74308e-06	ENSG00000259494	MRPL46	ENSG00000259494	MRPL46
ENSDARG00000026090	adprm	44.2228	1.16372	2.24035	0.446359	0.220858	5.26911	1.3709e-07	2.62175e-06	ENSG00000170222	ADPRM	ENSG00000170222	ADPRM
ENSDARG00000094833	coa5	18.8648	1.16276	2.23886	0.446656	0.335246	3.46839	0.000523589	0.00304723	ENSG00000183513	COA5	ENSG00000183513	COA5
ENSDARG00000043640	cenpn	43.4532	1.16143	2.2368	0.447068	0.426583	2.72265	0.00647615	0.0248823	ENSG00000166451	CENPN	ENSG00000166451	CENPN
ENSDARG00000092798	ppib	981.213	1.16141	2.23676	0.447074	0.222871	5.21114	1.87682e-07	3.43028e-06	ENSG00000166794	PPIB	ENSG00000166794	PPIB
ENSDARG00000090993	rnf4	109.37	1.16071	2.23567	0.447293	0.433187	2.67946	0.00737405	0.0276701	ENSG00000063978	RNF4	ENSG00000063978	RNF4
ENSDARG00000003564	dohh	80.4495	1.16067	2.23561	0.447305	0.197915	5.86447	4.50577e-09	1.38469e-07	ENSG00000129932	DOHH	ENSG00000129932	DOHH
ENSDARG00000011405	rps9	1842.6	1.16062	2.23553	0.44732	0.24125	4.81086	1.50281e-06	2.08073e-05	ENSG00000170889	RPS9	ENSG00000170889	RPS9
ENSDARG00000040666	nifk	109.689	1.16026	2.23498	0.447431	0.332557	3.48891	0.000484996	0.00285714	ENSG00000155438	NIFK	ENSG00000155438	NIFK
ENSDARG00000102333	fcf1	30.9473	1.15979	2.23424	0.447579	0.332878	3.48412	0.000493758	0.00290134	ENSG00000119616	FCF1	ENSG00000119616	FCF1
ENSDARG00000033999	cyp26a1	53.4685	1.15867	2.23251	0.447926	0.406628	2.84945	0.00437944	0.017984	ENSG00000095596	CYP26A1	ENSG00000095596	CYP26A1
ENSDARG00000021124	cfl1	1474.63	1.15854	2.23231	0.447967	0.17494	6.62246	3.53272e-11	2.09666e-09
ENSDARG00000053254	mylpfa	32074.6	1.15848	2.23223	0.447983	0.484719	2.39001	0.016848	0.054268	ENSG00000180209	MYLPF	ENSG00000180209	MYLPF
ENSDARG00000015686	bmp6	13.4905	1.15836	2.23203	0.448022	0.337289	3.43432	0.000594044	0.00339433	ENSG00000153162	BMP6	ENSG00000153162	BMP6
ENSDARG00000039354	ska1	50.7238	1.15824	2.23184	0.44806	0.423654	2.73392	0.00625845	0.0241849	ENSG00000154839	SKA1	ENSG00000154839	SKA1
ENSDARG00000035622	xbp1	755.802	1.15782	2.2312	0.448189	0.203841	5.68003	1.34675e-08	3.52211e-07	ENSG00000100219	XBP1	ENSG00000100219	XBP1
ENSDARG00000101216	meaf6	84.1625	1.1576	2.23087	0.448256	0.259718	4.45716	8.30522e-06	8.90404e-05	ENSG00000163875	MEAF6	ENSG00000163875	MEAF6
ENSDARG00000018461	zgc:56095	254.544	1.15724	2.2303	0.448371	0.209075	5.53503	3.11184e-08	7.18568e-07
ENSDARG00000002016	ppil2	98.3202	1.15712	2.23012	0.448406	0.279326	4.14255	3.4347e-05	0.000302221	ENSG00000100023	PPIL2	ENSG00000100023	PPIL2
ENSDARG00000098972	mrps16	36.0397	1.15707	2.23004	0.448423	0.29811	3.88135	0.000103877	0.000769253	ENSG00000182180	MRPS16	ENSG00000182180	MRPS16
ENSDARG00000099476	zgc:174863	105.646	1.15654	2.22922	0.448587	0.29383	3.93608	8.28245e-05	0.000634682
ENSDARG00000039979	tecrl2b	16.757	1.1558	2.22807	0.448819	0.325804	3.54752	0.000388873	0.00235932
ENSDARG00000016837	glipr2l	58.7653	1.15539	2.22745	0.448944	0.323692	3.56942	0.000357769	0.00220615	ENSG00000122694	GLIPR2	ENSG00000122694	GLIPR2
ENSDARG00000090673	si:ch1073-104i17.1	7.62621	1.15509	2.22698	0.449038	0.46058	2.5079	0.0121451	0.0415598	ENSG00000105072	C19orf44	ENSG00000105072	C19orf44
ENSDARG00000004727	cmss1	34.7596	1.15466	2.22632	0.449172	0.334757	3.44925	0.000562141	0.00324245	ENSG00000184220	CMSS1	ENSG00000184220	CMSS1
ENSDARG00000037108	pfdn6	36.1336	1.15462	2.22626	0.449185	0.248025	4.65526	3.23564e-06	3.96333e-05	ENSG00000204220	PFDN6	ENSG00000204220	PFDN6
ENSDARG00000042159	RFESD (1 of many)	4.77417	1.15405	2.22538	0.449362	0.492345	2.34399	0.0190788	0.0600666	ENSG00000175449	RFESD	ENSG00000175449	RFESD
ENSDARG00000093821	si:ch211-110p13.9	18.8747	1.15402	2.22533	0.449371	0.323422	3.56816	0.0003595	0.00221419
ENSDARG00000100635	chia.1	8352.99	1.15379	2.22498	0.449442	0.471672	2.44617	0.0144382	0.0477652	ENSG00000085465	OVGP1	ENSG00000085465	OVGP1
ENSDARG00000061370	tsen34	35.8485	1.15295	2.22368	0.449706	0.267417	4.31142	1.6221e-05	0.00015774	ENSG00000170892	TSEN34	ENSG00000170892	TSEN34
ENSDARG00000091831	ddx27	155.176	1.15286	2.22354	0.449734	0.218442	5.27763	1.30868e-07	2.51921e-06	ENSG00000124228	DDX27	ENSG00000124228	DDX27
ENSDARG00000073899	nemp1	38.0435	1.15273	2.22335	0.449772	0.392296	2.93843	0.00329884	0.0141614	ENSG00000166881	NEMP1	ENSG00000166881	NEMP1
ENSDARG00000092364	si:ch211-218c6.8	16.3185	1.1527	2.22329	0.449784	0.342853	3.36207	0.000773609	0.00423237
ENSDARG00000069425	hsbp1a	13.5879	1.15269	2.22328	0.449785	0.527195	2.18646	0.0287819	0.0841048	ENSG00000230989	HSBP1	ENSG00000230989	HSBP1
ENSDARG00000100439	zgc:153383	3.57868	1.15214	2.22243	0.449957	0.547093	2.10593	0.0352106	0.0985563	ENSG00000151327	FAM177A1	ENSG00000151327	FAM177A1
ENSDARG00000006219	gnl3	143.888	1.15183	2.22196	0.450053	0.249703	4.61282	3.9725e-06	4.72879e-05	ENSG00000163938	GNL3	ENSG00000163938	GNL3
ENSDARG00000092464	si:dkeyp-20g2.1	46.1193	1.15173	2.2218	0.450086	0.360575	3.19414	0.00140246	0.006957	ENSG00000204536	CCHCR1	ENSG00000204536	CCHCR1
ENSDARG00000019572	taf7	89.7946	1.15123	2.22103	0.450241	0.207615	5.54502	2.93916e-08	6.88673e-07	ENSG00000178913	TAF7	ENSG00000178913	TAF7
ENSDARG00000074146	zgc:113452	44.1748	1.15083	2.22041	0.450367	0.238239	4.83055	1.36153e-06	1.90421e-05
ENSDARG00000010316	qars	239.23	1.15077	2.22032	0.450386	0.168461	6.83107	8.42863e-12	6.06188e-10	ENSG00000172053	QARS	ENSG00000172053	QARS
ENSDARG00000045129	fkbp10b	82.8405	1.14998	2.21911	0.450632	0.200133	5.74608	9.13359e-09	2.52245e-07	ENSG00000141756	FKBP10	ENSG00000141756	FKBP10
ENSDARG00000025391	pfdn2	170.684	1.14997	2.2191	0.450633	0.191405	6.00808	1.87729e-09	6.59057e-08	ENSG00000143256	PFDN2	ENSG00000143256	PFDN2
ENSDARG00000037378	qdprb1	18.3098	1.1497	2.21868	0.450718	0.322155	3.56879	0.000358632	0.00221082	ENSG00000151552	QDPR	ENSG00000151552	QDPR
ENSDARG00000101300	ssna1	31.227	1.1493	2.21806	0.450844	0.356593	3.223	0.00126857	0.00641658	ENSG00000176101	SSNA1	ENSG00000176101	SSNA1
ENSDARG00000101926	zgc:101130	12.9879	1.14862	2.21701	0.451058	0.302782	3.79355	0.000148511	0.00104381
ENSDARG00000068967	zgc:153372	11.2841	1.14853	2.21688	0.451085	0.541269	2.12192	0.0338448	0.0955729
ENSDARG00000011723	zgc:56556	21.9758	1.14778	2.21573	0.451319	0.240854	4.76546	1.88423e-06	2.5034e-05	ENSG00000082213	C5orf22	ENSG00000082213	C5orf22
ENSDARG00000037955	pih1d1	25.4457	1.14757	2.21541	0.451383	0.323925	3.54272	0.00039603	0.00239572	ENSG00000104872	PIH1D1	ENSG00000104872	PIH1D1
ENSDARG00000029003	eif1axa	84.233	1.14708	2.21466	0.451537	0.259175	4.42591	9.60376e-06	0.000100771
ENSDARG00000042469	ndufa12	23.0308	1.14696	2.21447	0.451575	0.365001	3.14236	0.00167593	0.00806917	ENSG00000184752	NDUFA12	ENSG00000184752	NDUFA12
ENSDARG00000057899	zgc:114081	15.8702	1.14674	2.21413	0.451644	0.328962	3.48594	0.000490418	0.0028858	ENSG00000132879	FBXO44
ENSDARG00000058562	znf990	32.8737	1.14669	2.21406	0.45166	0.462977	2.47678	0.0132575	0.0446217
ENSDARG00000043288	impact	36.2776	1.1456	2.21239	0.452001	0.276951	4.13649	3.52666e-05	0.000308869	ENSG00000154059	IMPACT	ENSG00000154059	IMPACT
ENSDARG00000042337	chrac1	56.3596	1.1456	2.21239	0.452001	0.357175	3.2074	0.0013394	0.00670444	ENSG00000104472	CHRAC1	ENSG00000104472	CHRAC1
ENSDARG00000052917	si:ch211-202f3.3	12.7296	1.14544	2.21214	0.452051	0.430621	2.65998	0.00781458	0.0290546	ENSG00000214711	CAPN14
ENSDARG00000077698	rsad1	18.6941	1.14538	2.21204	0.452071	0.42933	2.66783	0.00763439	0.0284921	ENSG00000136444	RSAD1	ENSG00000136444	RSAD1
ENSDARG00000024744	dpp6b	24.8931	1.14444	2.2106	0.452365	0.338992	3.376	0.00073547	0.00405909	ENSG00000130226	DPP6	ENSG00000130226	DPP6
ENSDARG00000044619	birc2	253.148	1.14398	2.2099	0.452508	0.163031	7.01696	2.26752e-12	2.02444e-10	ENSG00000023445	BIRC3
ENSDARG00000104287	oraov1	23.5615	1.14361	2.20933	0.452627	0.32575	3.51069	0.000446945	0.00266302	ENSG00000149716	ORAOV1	ENSG00000149716	ORAOV1
ENSDARG00000069672	tyw5	37.4939	1.14332	2.20888	0.452717	0.233511	4.8962	9.7709e-07	1.41925e-05	ENSG00000162971	TYW5	ENSG00000162971	TYW5
ENSDARG00000017612	pnpo	62.6394	1.14331	2.20886	0.452721	0.243164	4.70179	2.57885e-06	3.26502e-05	ENSG00000108439	PNPO	ENSG00000108439	PNPO
ENSDARG00000091754	CHCHD5	27.4394	1.14277	2.20805	0.452888	0.365719	3.12473	0.00177969	0.00849566	ENSG00000125611	CHCHD5	ENSG00000125611	CHCHD5
ENSDARG00000070607	mrpl36	113.392	1.14253	2.20768	0.452965	0.232946	4.90471	9.35674e-07	1.36579e-05	ENSG00000171421	MRPL36	ENSG00000171421	MRPL36
ENSDARG00000069966	alox5b.3	169.248	1.14253	2.20767	0.452966	0.416128	2.74561	0.00603983	0.0234715	ENSG00000012779	ALOX5	ENSG00000012779	ALOX5
ENSDARG00000069326	mus81	62.788	1.14233	2.20737	0.453028	0.48268	2.36664	0.0179505	0.0572894	ENSG00000172732	MUS81	ENSG00000172732	MUS81
ENSDARG00000058824	mrpl4	72.6509	1.14163	2.2063	0.453248	0.196886	5.79844	6.69348e-09	1.9123e-07	ENSG00000105364	MRPL4	ENSG00000105364	MRPL4
ENSDARG00000031885	psmb12	36.4972	1.14141	2.20596	0.453317	0.530089	2.15324	0.0313001	0.0898196
ENSDARG00000043684	bpnt1	127.826	1.14134	2.20586	0.453338	0.271721	4.20042	2.66425e-05	0.000243318	ENSG00000162813	BPNT1	ENSG00000162813	BPNT1
ENSDARG00000027538	noxred1	10.7659	1.14111	2.20551	0.453411	0.531107	2.14855	0.0316702	0.0907185	ENSG00000165555	NOXRED1	ENSG00000165555	NOXRED1
ENSDARG00000063344	fam162a	68.7537	1.14108	2.20546	0.453419	0.222857	5.12025	3.05136e-07	5.2669e-06	ENSG00000183807	FAM162B	ENSG00000183807	FAM162B
ENSDARG00000003081	mybphb	3986.13	1.13973	2.20341	0.453843	0.47411	2.40394	0.0162193	0.0525085	ENSG00000133055	MYBPH
ENSDARG00000006399	ywhae1	480.765	1.13855	2.2016	0.454215	0.184116	6.18389	6.25421e-10	2.56015e-08	ENSG00000108953	YWHAE	ENSG00000108953	YWHAE
ENSDARG00000011885	mrpl19	82.7397	1.13789	2.20059	0.454424	0.193519	5.87998	4.10312e-09	1.2761e-07	ENSG00000115364	MRPL19	ENSG00000115364	MRPL19
ENSDARG00000015921	pwp1	65.3734	1.13762	2.20017	0.45451	0.243987	4.66261	3.12228e-06	3.84951e-05	ENSG00000136045	PWP1	ENSG00000136045	PWP1
ENSDARG00000004692	nabp1a	125.739	1.13695	2.19916	0.454719	0.299549	3.79555	0.000147315	0.00103822
ENSDARG00000016058	fibpa	55.2997	1.13693	2.19913	0.454726	0.250692	4.53517	5.75567e-06	6.49056e-05	ENSG00000172500	FIBP	ENSG00000172500	FIBP
ENSDARG00000007657	ccnh	37.3849	1.1362	2.19802	0.454956	0.417043	2.72442	0.00644141	0.0247764	ENSG00000134480	CCNH	ENSG00000134480	CCNH
ENSDARG00000029259	zgc:136493	29.944	1.13616	2.19795	0.45497	0.228835	4.96497	6.87125e-07	1.04343e-05
ENSDARG00000037645	zgc:173570	14.9025	1.13474	2.1958	0.455416	0.310069	3.65965	0.000252557	0.00164971	ENSG00000132879	FBXO44
ENSDARG00000089572	tfpt	29.9118	1.13457	2.19553	0.455471	0.268355	4.22787	2.35909e-05	0.000218826	ENSG00000105619	TFPT	ENSG00000105619	TFPT
ENSDARG00000008740	esf1	95.7979	1.13379	2.19434	0.455717	0.190112	5.96379	2.46458e-09	8.19404e-08	ENSG00000089048	ESF1	ENSG00000089048	ESF1
ENSDARG00000061989	mpnd	21.9926	1.13369	2.1942	0.455747	0.241582	4.69279	2.69502e-06	3.38109e-05	ENSG00000008382	MPND	ENSG00000008382	MPND
ENSDARG00000092609	aup1	116.475	1.13351	2.19391	0.455807	0.160734	7.05207	1.76272e-12	1.62272e-10	ENSG00000115307	AUP1	ENSG00000115307	AUP1
ENSDARG00000012495	mphosph10	151.503	1.13348	2.19388	0.455814	0.36292	3.12323	0.00178879	0.00852928	ENSG00000124383	MPHOSPH10	ENSG00000124383	MPHOSPH10
ENSDARG00000016160	gmpr	114.215	1.13282	2.19286	0.456025	0.487861	2.32201	0.0202326	0.0629815	ENSG00000137198	GMPR	ENSG00000137198	GMPR
ENSDARG00000010244	rpl22l1	179.98	1.13262	2.19257	0.456085	0.272618	4.15462	3.2583e-05	0.000289033	ENSG00000163584	RPL22L1	ENSG00000163584	RPL22L1
ENSDARG00000080020	il13ra1	46.7833	1.13246	2.19233	0.456136	0.44909	2.52168	0.0116795	0.0402793
ENSDARG00000103205	si:ch211-161f7.2	5.67741	1.13175	2.19125	0.456361	0.464116	2.43851	0.0147479	0.0485262
ENSDARG00000053159	zgc:110626	12.8446	1.13145	2.19078	0.456458	0.483354	2.34083	0.0192412	0.0604676
ENSDARG00000061314	ngrn	32.8525	1.13138	2.19068	0.456479	0.290927	3.88888	0.000100709	0.000748199	ENSG00000182768	NGRN	ENSG00000182768	NGRN
ENSDARG00000027403	zgpat	57.3105	1.13135	2.19064	0.456488	0.218815	5.17036	2.33639e-07	4.13975e-06	ENSG00000197114	ZGPAT	ENSG00000197114	ZGPAT
ENSDARG00000003592	surf1	32.8873	1.13132	2.1906	0.456497	0.25614	4.41682	1.00165e-05	0.000104572	ENSG00000148290	SURF1	ENSG00000148290	SURF1
ENSDARG00000016886	dnajb9b	32.6916	1.13106	2.19019	0.456581	0.360588	3.1367	0.00170861	0.00820173	ENSG00000128590	DNAJB9	ENSG00000128590	DNAJB9
ENSDARG00000052037	trim35-1	18.9642	1.13103	2.19014	0.456591	0.351058	3.22177	0.00127402	0.00643471	ENSG00000104228	TRIM35	ENSG00000104228	TRIM35
ENSDARG00000100015	si:ch211-248k15.2	66.8485	1.1306	2.1895	0.456726	0.381189	2.96598	0.00301718	0.0131798
ENSDARG00000092693	tpt1	4826.4	1.13017	2.18884	0.456863	0.202554	5.57959	2.41086e-08	5.87484e-07	ENSG00000133112	TPT1	ENSG00000133112	TPT1
ENSDARG00000024465	mrps18a	83.6095	1.12976	2.18822	0.456992	0.194736	5.8015	6.57258e-09	1.88036e-07	ENSG00000096080	MRPS18A	ENSG00000096080	MRPS18A
ENSDARG00000005800	ampd3a	28.5637	1.12948	2.1878	0.457081	0.421263	2.68117	0.00733646	0.0275589	ENSG00000133805	AMPD3	ENSG00000133805	AMPD3
ENSDARG00000054172	pgrmc1	257.551	1.12935	2.1876	0.457121	0.209661	5.38655	7.18243e-08	1.49068e-06	ENSG00000101856	PGRMC1	ENSG00000101856	PGRMC1
ENSDARG00000098313	nadka	21.6927	1.12929	2.1875	0.457142	0.243939	4.62937	3.66783e-06	4.42725e-05	ENSG00000008130	NADK	ENSG00000008130	NADK
ENSDARG00000054805	btr09	25.1194	1.12901	2.18709	0.457229	0.372559	3.03042	0.00244215	0.0110567	ENSG00000223638	RFPL4A
ENSDARG00000036058	gnao1b	23.2219	1.12854	2.18638	0.457377	0.501368	2.25093	0.02439	0.0733861	ENSG00000087258	GNAO1	ENSG00000087258	GNAO1
ENSDARG00000076891	rfxap	64.8053	1.12844	2.18622	0.457411	0.181302	6.22408	4.84399e-10	2.04762e-08	ENSG00000133111	RFXAP	ENSG00000133111	RFXAP
ENSDARG00000035198	gcnt4a	17.6663	1.12793	2.18544	0.457573	0.389112	2.89871	0.00374696	0.0157809	ENSG00000176928	GCNT4	ENSG00000176928	GCNT4
ENSDARG00000104959	dnajc17	17.9898	1.12743	2.18469	0.457732	0.323049	3.48995	0.000483115	0.00284849	ENSG00000104129	DNAJC17	ENSG00000104129	DNAJC17
ENSDARG00000090194	lamtor5	25.4565	1.1273	2.1845	0.457771	0.221647	5.08602	3.65662e-07	6.10804e-06	ENSG00000134248	LAMTOR5	ENSG00000134248	LAMTOR5
ENSDARG00000002830	trmt2a	65.8589	1.12643	2.18317	0.458049	0.246902	4.56224	5.06099e-06	5.80607e-05	ENSG00000099899	TRMT2A	ENSG00000099899	TRMT2A
ENSDARG00000035433	arpc5lb	43.042	1.12608	2.18265	0.458159	0.221594	5.08172	3.7403e-07	6.21772e-06	ENSG00000136950	ARPC5L	ENSG00000136950	ARPC5L
ENSDARG00000053496	gemin8	100.803	1.12455	2.18034	0.458644	0.209893	5.35776	8.42618e-08	1.70813e-06	ENSG00000046647	GEMIN8	ENSG00000046647	GEMIN8
ENSDARG00000016253	ralab	58.0892	1.1245	2.18027	0.45866	0.292224	3.84809	0.000119041	0.000866067	ENSG00000006451	RALA	ENSG00000006451	RALA
ENSDARG00000025549	ndufaf1	55.3927	1.12449	2.18024	0.458665	0.20007	5.62047	1.90439e-08	4.73537e-07	ENSG00000137806	NDUFAF1	ENSG00000137806	NDUFAF1
ENSDARG00000025332	rbm28	124.478	1.12448	2.18023	0.458668	0.259865	4.32717	1.51039e-05	0.000148129	ENSG00000106344	RBM28	ENSG00000106344	RBM28
ENSDARG00000040678	ccdc93	33.2634	1.12432	2.17999	0.458718	0.290681	3.86788	0.000109784	0.000805796	ENSG00000125633	CCDC93	ENSG00000125633	CCDC93
ENSDARG00000022983	ccdc28a	89.5639	1.12408	2.17963	0.458795	0.254812	4.41141	1.02701e-05	0.000106761	ENSG00000024862	CCDC28A	ENSG00000024862	CCDC28A
ENSDARG00000073813	scly	11.9711	1.12383	2.17924	0.458875	0.323318	3.47593	0.000509093	0.00297961	ENSG00000132330	SCLY	ENSG00000132330	SCLY
ENSDARG00000098578	pdgfab	32.2279	1.12372	2.17908	0.458909	0.483043	2.32634	0.0200007	0.0623674	ENSG00000197461	PDGFA	ENSG00000197461	PDGFA
ENSDARG00000011999	ybey	33.1381	1.12333	2.17849	0.459033	0.275275	4.08075	4.489e-05	0.000378895	ENSG00000182362	YBEY	ENSG00000182362	YBEY
ENSDARG00000015611	rasl11b	58.3668	1.12281	2.17771	0.459198	0.485414	2.3131	0.0207173	0.0642392	ENSG00000128045	RASL11B	ENSG00000128045	RASL11B
ENSDARG00000052427	zgc:153929	35.1775	1.12243	2.17714	0.459319	0.309166	3.63051	0.000282859	0.00181141	ENSG00000162069	BICDL2	ENSG00000162069	BICDL2
ENSDARG00000070824	ndufb5	130.092	1.12191	2.17635	0.459484	0.194884	5.75681	8.57163e-09	2.3892e-07	ENSG00000136521	NDUFB5	ENSG00000136521	NDUFB5
ENSDARG00000004956	zmat2	50.8886	1.12153	2.17578	0.459606	0.245832	4.56218	5.06241e-06	5.80607e-05	ENSG00000146007	ZMAT2	ENSG00000146007	ZMAT2
ENSDARG00000041110	dnajc3a	153.902	1.12141	2.17559	0.459646	0.201846	5.55574	2.7644e-08	6.58908e-07	ENSG00000102580	DNAJC3	ENSG00000102580	DNAJC3
ENSDARG00000057026	ran	1078.3	1.12095	2.17491	0.459789	0.13286	8.43714	3.252e-17	1.10424e-14	ENSG00000132341	RAN	ENSG00000132341	RAN
ENSDARG00000074356	fxn	54.2851	1.12073	2.17457	0.45986	0.34416	3.25643	0.00112824	0.00581467	ENSG00000165060	FXN	ENSG00000165060	FXN
ENSDARG00000069499	spag1b	7.43499	1.1205	2.17423	0.459934	0.531057	2.10995	0.034863	0.0978347
ENSDARG00000076330	dusp12	32.5936	1.12041	2.17409	0.459963	0.332429	3.37037	0.000750664	0.00412975	ENSG00000081721	DUSP12	ENSG00000081721	DUSP12
ENSDARG00000100585	coa3a	39.6032	1.12013	2.17366	0.460053	0.249415	4.49102	7.08839e-06	7.79309e-05	ENSG00000183978	COA3	ENSG00000183978	COA3
ENSDARG00000038027	nol12	98.5275	1.1199	2.17331	0.460127	0.244032	4.58915	4.4506e-06	5.20527e-05	ENSG00000273899	NOL12
ENSDARG00000062165	tub	4.79442	1.11907	2.17207	0.46039	0.493558	2.26736	0.0233684	0.0709825	ENSG00000166402	TUB	ENSG00000166402	TUB
ENSDARG00000002174	itfg2	28.681	1.11906	2.17206	0.460393	0.273433	4.09263	4.26504e-05	0.000362502	ENSG00000111203	ITFG2	ENSG00000111203	ITFG2
ENSDARG00000005827	eif2s1a	160.637	1.11901	2.17197	0.460411	0.210284	5.3214	1.0297e-07	2.04292e-06	ENSG00000134001	EIF2S1	ENSG00000134001	EIF2S1
ENSDARG00000054821	nubpl	15.8105	1.11843	2.17111	0.460595	0.354182	3.15778	0.00158975	0.00773698	ENSG00000151413	NUBPL	ENSG00000151413	NUBPL
ENSDARG00000024728	hdhd2	17.3626	1.11804	2.17052	0.46072	0.290564	3.84782	0.000119174	0.000866731	ENSG00000167220	HDHD2	ENSG00000167220	HDHD2
ENSDARG00000071670	tma7	48.9515	1.11774	2.17007	0.460815	0.326639	3.42195	0.000621746	0.00353305	ENSG00000225528	Z82206.1
ENSDARG00000017425	crocc2	8.79437	1.11699	2.16895	0.461053	0.438223	2.54892	0.0108057	0.0378264	ENSG00000226321	CROCC2	ENSG00000226321	CROCC2
ENSDARG00000032056	arl6	38.9257	1.11619	2.16774	0.46131	0.281603	3.96371	7.37939e-05	0.00057527	ENSG00000113966	ARL6	ENSG00000113966	ARL6
ENSDARG00000033171	trappc6bl	29.0885	1.11515	2.16617	0.461644	0.241834	4.61122	4.00318e-06	4.75446e-05	ENSG00000007255	TRAPPC6A	ENSG00000007255	TRAPPC6A
ENSDARG00000018303	etv4	40.5727	1.11404	2.16451	0.461999	0.332435	3.35115	0.000804772	0.00436825	ENSG00000175832	ETV4	ENSG00000175832	ETV4
ENSDARG00000005799	smim14	165.074	1.11338	2.16352	0.462209	0.262557	4.24054	2.2298e-05	0.000208534	ENSG00000163683	SMIM14	ENSG00000163683	SMIM14
ENSDARG00000092816	si:dkey-93n13.2	21.7271	1.11308	2.16306	0.462307	0.348314	3.19561	0.00139537	0.00693765
ENSDARG00000104297	si:ch73-380l10.2	4.06099	1.113	2.16295	0.462332	0.513208	2.16871	0.030105	0.0871386	ENSG00000164326	CARTPT	ENSG00000164326	CARTPT
ENSDARG00000088116	gstm.3	75.1398	1.1128	2.16266	0.462395	0.439079	2.53441	0.0112638	0.0391586	ENSG00000213366	GSTM2
ENSDARG00000039096	si:dkey-24p1.1	6.74292	1.11246	2.16214	0.462505	0.423544	2.62655	0.00862552	0.0314202	ENSG00000088827	SIGLEC1
ENSDARG00000070391	tspan4b	31.6686	1.11226	2.16184	0.46257	0.35219	3.15812	0.00158792	0.00773348
ENSDARG00000077012	eif4ea	52.2809	1.11216	2.16169	0.4626	0.271682	4.09361	4.24704e-05	0.000361269	ENSG00000151247	EIF4E	ENSG00000151247	EIF4E
ENSDARG00000002591	ruvbl1	189.804	1.11212	2.16163	0.462615	0.252503	4.40436	1.06095e-05	0.000109823	ENSG00000175792	RUVBL1	ENSG00000175792	RUVBL1
ENSDARG00000019230	rpl7a	3865.33	1.1117	2.16101	0.462747	0.189882	5.85471	4.77847e-09	1.43753e-07	ENSG00000148303	RPL7A	ENSG00000148303	RPL7A
ENSDARG00000006434	polr1e	64.0212	1.11146	2.16064	0.462827	0.382465	2.90603	0.00366044	0.0154543	ENSG00000137054	POLR1E	ENSG00000137054	POLR1E
ENSDARG00000035699	srp19	49.4245	1.11141	2.16057	0.462841	0.248109	4.47952	7.48106e-06	8.15553e-05	ENSG00000272869	AC008575.2
ENSDARG00000031346	rbm17	56.5409	1.11122	2.16028	0.462903	0.237853	4.67187	2.98472e-06	3.69973e-05	ENSG00000134453	RBM17	ENSG00000134453	RBM17
ENSDARG00000015325	u2af1	123.574	1.11082	2.15968	0.463032	0.284709	3.90158	9.55684e-05	0.000716435	ENSG00000275895	U2AF1L5
ENSDARG00000002403	nusap1	209.576	1.11065	2.15943	0.463085	0.401665	2.76512	0.00569018	0.022339	ENSG00000137804	NUSAP1	ENSG00000137804	NUSAP1
ENSDARG00000029688	hsp70.1	17.7188	1.1097	2.158	0.463392	0.465224	2.38529	0.0170655	0.0548563
ENSDARG00000042509	glod4	24.994	1.10954	2.15777	0.46344	0.243416	4.55821	5.15908e-06	5.90386e-05	ENSG00000167699	GLOD4	ENSG00000167699	GLOD4
ENSDARG00000001804	zgc:112148	18.8038	1.10937	2.15752	0.463495	0.305241	3.63441	0.000278612	0.00178776	ENSG00000175106	TVP23C
ENSDARG00000042799	atpaf1	55.876	1.10928	2.15738	0.463526	0.208606	5.31756	1.05165e-07	2.08249e-06	ENSG00000123472	ATPAF1	ENSG00000123472	ATPAF1
ENSDARG00000035264	riok2	97.2006	1.10876	2.1566	0.463692	0.236846	4.68135	2.84987e-06	3.54958e-05	ENSG00000058729	RIOK2	ENSG00000058729	RIOK2
ENSDARG00000044072	TATDN3	11.4492	1.10832	2.15595	0.463833	0.394621	2.80858	0.00497611	0.0200059	ENSG00000203705	TATDN3	ENSG00000203705	TATDN3
ENSDARG00000033609	map1lc3a	84.2714	1.10778	2.15514	0.464007	0.329305	3.36399	0.000768235	0.00420853	ENSG00000101460	MAP1LC3A	ENSG00000101460	MAP1LC3A
ENSDARG00000069671	MAIP1	38.2639	1.1072	2.15428	0.464193	0.194249	5.69992	1.19861e-08	3.19266e-07	ENSG00000162972	MAIP1	ENSG00000162972	MAIP1
ENSDARG00000017067	chordc1b	64.2699	1.10683	2.15372	0.464314	0.250568	4.41728	9.99496e-06	0.0001044	ENSG00000110172	CHORDC1	ENSG00000110172	CHORDC1
ENSDARG00000029660	commd5	11.38	1.10638	2.15305	0.464458	0.328061	3.37248	0.000744936	0.00410369	ENSG00000170619	COMMD5	ENSG00000170619	COMMD5
ENSDARG00000094043	si:ch73-376l24.3	64.5535	1.10616	2.15272	0.464528	0.394838	2.80156	0.00508562	0.0203733	ENSG00000125482	TTF1	ENSG00000125482	TTF1
ENSDARG00000041602		43.2604	1.10556	2.15183	0.464721	0.220398	5.01621	5.26996e-07	8.29458e-06	ENSG00000168288	MMADHC	ENSG00000168288	MMADHC
ENSDARG00000039887	c1qbp	254.29	1.10544	2.15164	0.464762	0.191594	5.76969	7.94191e-09	2.23203e-07	ENSG00000108561	C1QBP	ENSG00000108561	C1QBP
ENSDARG00000076486	acp1	95.3977	1.10534	2.15149	0.464794	0.220366	5.01592	5.27796e-07	8.30087e-06	ENSG00000143727	ACP1	ENSG00000143727	ACP1
ENSDARG00000000906	skap2	31.9813	1.10527	2.15139	0.464817	0.275491	4.01198	6.0211e-05	0.000484519	ENSG00000005020	SKAP2	ENSG00000005020	SKAP2
ENSDARG00000046053	slc27a6	65.6937	1.10492	2.15087	0.464929	0.298878	3.69689	0.000218255	0.00145221	ENSG00000113396	SLC27A6	ENSG00000113396	SLC27A6
ENSDARG00000075826	msh4	40.9902	1.10449	2.15022	0.465068	0.508696	2.17121	0.0299152	0.0867145	ENSG00000057468	MSH4	ENSG00000057468	MSH4
ENSDARG00000021149	cbr1l	353.378	1.1031	2.14816	0.465514	0.215363	5.12205	3.02227e-07	5.2254e-06
ENSDARG00000067838	riox1	43.8773	1.10294	2.14791	0.465568	0.229632	4.80305	1.56266e-06	2.13929e-05	ENSG00000170468	RIOX1	ENSG00000170468	RIOX1
ENSDARG00000038585	eif4e2	49.2963	1.10293	2.14791	0.465569	0.239483	4.60548	4.11523e-06	4.86214e-05	ENSG00000135930	EIF4E2	ENSG00000135930	EIF4E2
ENSDARG00000006691	rpl12	1964.29	1.1029	2.14787	0.465579	0.208836	5.2812	1.28338e-07	2.47563e-06	ENSG00000197958	RPL12	ENSG00000197958	RPL12
ENSDARG00000003681	eif5	634.355	1.10273	2.14761	0.465634	0.162667	6.77906	1.2096e-11	8.19899e-10	ENSG00000100664	EIF5	ENSG00000100664	EIF5
ENSDARG00000104664	dclk1b	27.3078	1.10265	2.14749	0.46566	0.267619	4.12023	3.78496e-05	0.00032734	ENSG00000133083	DCLK1	ENSG00000133083	DCLK1
ENSDARG00000037009	banf1	243.037	1.10234	2.14702	0.465761	0.205477	5.36478	8.10467e-08	1.65228e-06
ENSDARG00000062326	hmgn7	290.671	1.10092	2.14492	0.466218	0.212755	5.17461	2.28386e-07	4.07212e-06
ENSDARG00000042980	cyp2p7	49.2373	1.10086	2.14483	0.466237	0.514551	2.13947	0.032398	0.0924069	ENSG00000134716	CYP2J2	ENSG00000134716	CYP2J2
ENSDARG00000033273	primpol	50.55	1.10053	2.14434	0.466345	0.268184	4.10365	4.06682e-05	0.000347652	ENSG00000164306	PRIMPOL	ENSG00000164306	PRIMPOL
ENSDARG00000071594	TIMM21	17.7658	1.10034	2.14405	0.466406	0.284335	3.86988	0.00010889	0.000800367	ENSG00000075336	TIMM21	ENSG00000075336	TIMM21
ENSDARG00000051793	zgc:113426	26.139	1.10028	2.14396	0.466427	0.31219	3.52438	0.000424469	0.00254768
ENSDARG00000040466	vil1	2792.11	1.10006	2.14363	0.466498	0.332247	3.31097	0.000929741	0.00492651	ENSG00000127831	VIL1	ENSG00000127831	VIL1
ENSDARG00000086903	gig2o	30.3671	1.09988	2.14336	0.466556	0.262361	4.19223	2.76225e-05	0.000250831
ENSDARG00000018936	zcchc17	30.6639	1.09967	2.14305	0.466624	0.26696	4.11923	3.80142e-05	0.000328626	ENSG00000121766	ZCCHC17	ENSG00000121766	ZCCHC17
ENSDARG00000013837	spo11	24.4065	1.09923	2.1424	0.466766	0.299896	3.66537	0.000246982	0.00161891	ENSG00000054796	SPO11	ENSG00000054796	SPO11
ENSDARG00000018181	dnajc28	22.1144	1.09888	2.14188	0.46688	0.305367	3.59855	0.00032	0.00201648	ENSG00000177692	DNAJC28	ENSG00000177692	DNAJC28
ENSDARG00000028523	inip	18.5307	1.09855	2.1414	0.466985	0.345055	3.1837	0.00145404	0.00716404	ENSG00000148153	INIP	ENSG00000148153	INIP
ENSDARG00000039400	polr1c	33.6964	1.09786	2.14037	0.467209	0.253191	4.3361	1.45031e-05	0.000143254	ENSG00000171453	POLR1C	ENSG00000171453	POLR1C
ENSDARG00000026902	cryzl1	35.5019	1.09745	2.13977	0.467341	0.227014	4.8343	1.33612e-06	1.87373e-05	ENSG00000205758	CRYZL1	ENSG00000205758	CRYZL1
ENSDARG00000063030	mesdc2	76.3389	1.09711	2.13926	0.467452	0.200382	5.47508	4.37325e-08	9.74013e-07	ENSG00000117899	MESD	ENSG00000117899	MESD
ENSDARG00000104089	p3h4	21.062	1.09686	2.13888	0.467534	0.285504	3.84182	0.000122124	0.00088384	ENSG00000141696	P3H4	ENSG00000141696	P3H4
ENSDARG00000100075	abcg2a	519.995	1.09679	2.13879	0.467555	0.290775	3.77197	0.000161965	0.001122	ENSG00000118777	ABCG2	ENSG00000118777	ABCG2
ENSDARG00000006290	ndufs5	155.714	1.09636	2.13815	0.467695	0.25225	4.34632	1.38438e-05	0.000137528	ENSG00000168653	NDUFS5	ENSG00000168653	NDUFS5
ENSDARG00000044488	pak1ip1	61.556	1.09603	2.13766	0.467801	0.24413	4.48954	7.13775e-06	7.83488e-05	ENSG00000111845	PAK1IP1	ENSG00000111845	PAK1IP1
ENSDARG00000062977	samd13	39.671	1.09597	2.13757	0.467822	0.273351	4.00939	6.08756e-05	0.000488917	ENSG00000203943	SAMD13	ENSG00000203943	SAMD13
ENSDARG00000103135	stoml2	72.2547	1.09578	2.13729	0.467883	0.217497	5.03815	4.7006e-07	7.55341e-06	ENSG00000165283	STOML2	ENSG00000165283	STOML2
ENSDARG00000039649	mtif3	33.6237	1.09564	2.13708	0.467927	0.241122	4.54393	5.52142e-06	6.26659e-05	ENSG00000122033	MTIF3	ENSG00000122033	MTIF3
ENSDARG00000104396	trim25	127	1.09561	2.13703	0.467939	0.32564	3.36447	0.000766916	0.00420375	ENSG00000121060	TRIM25	ENSG00000121060	TRIM25
ENSDARG00000043972	ppp2r3c	32.1014	1.0955	2.13687	0.467975	0.250396	4.37505	1.21404e-05	0.000122905	ENSG00000092020	PPP2R3C	ENSG00000092020	PPP2R3C
ENSDARG00000033973	mrps23	43.9694	1.09474	2.13575	0.468219	0.245451	4.46014	8.1906e-06	8.79481e-05	ENSG00000181610	MRPS23	ENSG00000181610	MRPS23
ENSDARG00000103375	si:ch211-161m3.4	15.5227	1.0944	2.13524	0.468331	0.357833	3.05841	0.00222514	0.0102058
ENSDARG00000045928	psma4	219.638	1.09438	2.13522	0.468336	0.181407	6.03275	1.61193e-09	5.71711e-08	ENSG00000041357	PSMA4	ENSG00000041357	PSMA4
ENSDARG00000105117	sdad1	148.656	1.09367	2.13416	0.468569	0.237428	4.6063	4.09897e-06	4.84613e-05	ENSG00000198301	SDAD1	ENSG00000198301	SDAD1
ENSDARG00000042548	tpd52l1	25.7337	1.09338	2.13374	0.468661	0.29038	3.76535	0.000166319	0.00114679	ENSG00000111907	TPD52L1	ENSG00000111907	TPD52L1
ENSDARG00000067975	atpif1a	215.701	1.09287	2.13297	0.468829	0.223647	4.88657	1.02606e-06	1.48e-05	ENSG00000130770	ATPIF1	ENSG00000130770	ATPIF1
ENSDARG00000020217	cpsf4	69.9901	1.09274	2.13279	0.468869	0.227367	4.80608	1.5392e-06	2.11696e-05	ENSG00000160917	CPSF4	ENSG00000160917	CPSF4
ENSDARG00000068264	grhpra	25.7073	1.09215	2.13191	0.469062	0.458503	2.38199	0.0172194	0.055297	ENSG00000137106	GRHPR	ENSG00000137106	GRHPR
ENSDARG00000053456	GK3P	132.494	1.09101	2.13023	0.469432	0.200547	5.44017	5.32299e-08	1.1545e-06	ENSG00000196475	GK2
ENSDARG00000006235	brms1la	43.3348	1.0909	2.13006	0.469469	0.353894	3.08256	0.00205231	0.00956127	ENSG00000100916	BRMS1L	ENSG00000100916	BRMS1L
ENSDARG00000063522	bbs4	14.7803	1.09085	2.13	0.469484	0.37767	2.88837	0.00387244	0.0162209	ENSG00000140463	BBS4	ENSG00000140463	BBS4
ENSDARG00000071555	zgc:153675	57.3542	1.09082	2.12995	0.469495	0.271829	4.01289	5.99798e-05	0.000483221
ENSDARG00000040161	zgc:92287	164.046	1.09054	2.12954	0.469586	0.50384	2.16446	0.0304292	0.0878563
ENSDARG00000088841	dnal4b	25.288	1.08994	2.12866	0.46978	0.252283	4.32033	1.55799e-05	0.000152148	ENSG00000100246	DNAL4	ENSG00000100246	DNAL4
ENSDARG00000051889	dhodh	39.6728	1.08937	2.12781	0.469966	0.267421	4.07362	4.62882e-05	0.000388637	ENSG00000102967	DHODH	ENSG00000102967	DHODH
ENSDARG00000013307	rpl19	2048.54	1.08903	2.12731	0.470077	0.242401	4.49269	7.03297e-06	7.75097e-05	ENSG00000108298	RPL19	ENSG00000108298	RPL19
ENSDARG00000094300		77.1798	1.08858	2.12665	0.470223	0.327567	3.32324	0.000889793	0.0047403	ENSG00000176046	NUPR1	ENSG00000176046	NUPR1
ENSDARG00000020473	hddc3	31.1513	1.08796	2.12573	0.470426	0.219312	4.96079	7.02078e-07	1.05992e-05	ENSG00000184508	HDDC3	ENSG00000184508	HDDC3
ENSDARG00000094107	si:ch73-37h15.2	33.9548	1.08778	2.12546	0.470486	0.309333	3.51652	0.000437242	0.00261223	ENSG00000125482	TTF1	ENSG00000125482	TTF1
ENSDARG00000006915	arl8ba	85.3806	1.08763	2.12524	0.470535	0.203548	5.34333	9.12561e-08	1.83513e-06	ENSG00000134108	ARL8B	ENSG00000134108	ARL8B
ENSDARG00000016481	ptpn2a	15.8465	1.0875	2.12506	0.470575	0.273925	3.97008	7.18475e-05	0.000561788	ENSG00000175354	PTPN2	ENSG00000175354	PTPN2
ENSDARG00000019707	spout1	44.0521	1.08727	2.12472	0.470651	0.354174	3.06987	0.00214149	0.00990544	ENSG00000198917	SPOUT1	ENSG00000198917	SPOUT1
ENSDARG00000042620	gstr	871.908	1.08675	2.12395	0.470822	0.225027	4.82941	1.36941e-06	1.91265e-05
ENSDARG00000028198	ube2v2	370.598	1.08631	2.1233	0.470965	0.178702	6.07888	1.21027e-09	4.53315e-08	ENSG00000169139	UBE2V2	ENSG00000169139	UBE2V2
ENSDARG00000030591	lrrc42	36.4025	1.08628	2.12326	0.470975	0.389753	2.7871	0.00531826	0.0211556	ENSG00000116212	LRRC42	ENSG00000116212	LRRC42
ENSDARG00000100083	sgut1	163.698	1.08602	2.12287	0.47106	0.180859	6.00476	1.91616e-09	6.70429e-08	ENSG00000165416	SUGT1	ENSG00000165416	SUGT1
ENSDARG00000103484	si:ch211-215k15.5	13.679	1.08566	2.12234	0.471178	0.29238	3.71317	0.000204682	0.00137559
ENSDARG00000100256	si:dkey-88e18.8	11.4302	1.08531	2.12183	0.471292	0.485009	2.2377	0.0252404	0.0755497	ENSG00000169330	KIAA1024	ENSG00000169330	KIAA1024
ENSDARG00000040039	pttg1ipb	50.6114	1.08487	2.12118	0.471436	0.228524	4.74728	2.06171e-06	2.7028e-05	ENSG00000183255	PTTG1IP	ENSG00000183255	PTTG1IP
ENSDARG00000102846	trmt13	43.747	1.08399	2.11989	0.471722	0.26974	4.01866	5.8531e-05	0.000473761	ENSG00000122435	TRMT13	ENSG00000122435	TRMT13
ENSDARG00000075092	si:dkey-52l18.4	26.188	1.08334	2.11894	0.471933	0.387535	2.79548	0.0051823	0.0207102
ENSDARG00000000656	psmb9a	31.3871	1.08299	2.11842	0.47205	0.45799	2.36466	0.0180468	0.0575526	ENSG00000240065	PSMB9	ENSG00000240065	PSMB9
ENSDARG00000054963	alg1	59.1655	1.08284	2.11821	0.472097	0.401612	2.69625	0.00701256	0.0265531	ENSG00000251287	ALG1L2
ENSDARG00000057299	pbdc1	91.1984	1.08266	2.11794	0.472157	0.242095	4.47205	7.74734e-06	8.37966e-05	ENSG00000102390	PBDC1	ENSG00000102390	PBDC1
ENSDARG00000031246	hbegfb	21.8938	1.0826	2.11785	0.472177	0.26538	4.07944	4.5144e-05	0.000380573	ENSG00000113070	HBEGF	ENSG00000113070	HBEGF
ENSDARG00000029615	zgc:77056	25.1001	1.08162	2.11641	0.472498	0.309609	3.4935	0.000476724	0.00281402	ENSG00000163807	KIAA1143	ENSG00000163807	KIAA1143
ENSDARG00000038095	socs1a	28.0519	1.08025	2.11441	0.472946	0.34328	3.14686	0.00165035	0.00797381	ENSG00000185338	SOCS1	ENSG00000185338	SOCS1
ENSDARG00000100331	SMIM10	13.6983	1.07931	2.11303	0.473254	0.308622	3.49721	0.000470154	0.00278396	ENSG00000184785	SMIM10
ENSDARG00000098443	zfand6	125.607	1.0791	2.11272	0.473323	0.386078	2.79504	0.00518936	0.020719	ENSG00000086666	ZFAND6	ENSG00000086666	ZFAND6
ENSDARG00000016541	sash3	16.4148	1.0782	2.1114	0.47362	0.370662	2.90884	0.00362768	0.0153491	ENSG00000122122	SASH3	ENSG00000122122	SASH3
ENSDARG00000099448	sh3d21	95.9036	1.0779	2.11096	0.473717	0.211594	5.09421	3.502e-07	5.88295e-06	ENSG00000214193	SH3D21	ENSG00000214193	SH3D21
ENSDARG00000031680	ercc1	48.0336	1.07788	2.11093	0.473725	0.248135	4.34392	1.3996e-05	0.000138774	ENSG00000012061	ERCC1	ENSG00000012061	ERCC1
ENSDARG00000101295	psmd4a	118.983	1.07713	2.10984	0.473971	0.175018	6.1544	7.53644e-10	3.00197e-08	ENSG00000159352	PSMD4	ENSG00000159352	PSMD4
ENSDARG00000027938	rad18	76.6507	1.07669	2.10918	0.474117	0.425786	2.5287	0.0114486	0.0396414	ENSG00000070950	RAD18	ENSG00000070950	RAD18
ENSDARG00000068366	si:dkey-154p10.3	48.9689	1.07668	2.10918	0.474117	0.372767	2.88836	0.00387257	0.0162209
ENSDARG00000024184	narf	88.9816	1.07668	2.10917	0.474119	0.182658	5.89452	3.75781e-09	1.18471e-07	ENSG00000141562	NARF	ENSG00000141562	NARF
ENSDARG00000103922	bod1	38.0464	1.07665	2.10913	0.474129	0.2192	4.91173	9.02759e-07	1.32147e-05	ENSG00000228075	BOD1L2
ENSDARG00000087793	si:dkey-54n8.2	37.0535	1.07658	2.10903	0.474152	0.307838	3.49723	0.000470121	0.00278396
ENSDARG00000096849	si:dkey-16p21.8	62.0444	1.0762	2.10848	0.474276	0.247347	4.35097	1.35535e-05	0.000135092
ENSDARG00000005284	fbxl15	7.82877	1.07555	2.10752	0.47449	0.50491	2.13018	0.0331568	0.0940918	ENSG00000107872	FBXL15	ENSG00000107872	FBXL15
ENSDARG00000026281	lyrm1	13.0495	1.07547	2.10741	0.474515	0.303638	3.54197	0.000397157	0.00240114	ENSG00000102897	LYRM1	ENSG00000102897	LYRM1
ENSDARG00000067517	ccdc15	41.6044	1.07547	2.10741	0.474516	0.309552	3.47429	0.000512215	0.00299619	ENSG00000149548	CCDC15	ENSG00000149548	CCDC15
ENSDARG00000056582	map3k14b	16.4028	1.07524	2.10707	0.474592	0.392371	2.74036	0.00613712	0.0237826	ENSG00000006062	MAP3K14	ENSG00000006062	MAP3K14
ENSDARG00000006181	hif1aa	6.75383	1.07375	2.1049	0.475082	0.43778	2.45272	0.0141781	0.0470851	ENSG00000100644	HIF1A	ENSG00000100644	HIF1A
ENSDARG00000071378	si:dkey-78l4.14	48.6838	1.07366	2.10476	0.475113	0.241469	4.44636	8.73373e-06	9.29131e-05	ENSG00000174917	C19orf70	ENSG00000174917	C19orf70
ENSDARG00000074298	znf1015	16.3131	1.07308	2.10393	0.475302	0.321608	3.33662	0.000848032	0.0045636
ENSDARG00000077664	zgc:110239	462.492	1.07287	2.10362	0.475372	0.238212	4.50384	6.67362e-06	7.42377e-05
ENSDARG00000017985	zgc:77739	378.375	1.07242	2.10296	0.475521	0.272032	3.94225	8.07201e-05	0.000620622	ENSG00000151470	C4orf33	ENSG00000151470	C4orf33
ENSDARG00000042533	gstm.1	175.99	1.07233	2.10283	0.47555	0.244446	4.38678	1.1504e-05	0.000117496	ENSG00000213366	GSTM2
ENSDARG00000025233	lipt1	23.3533	1.07213	2.10254	0.475615	0.182883	5.86239	4.56241e-09	1.39177e-07	ENSG00000144182	LIPT1	ENSG00000144182	LIPT1
ENSDARG00000060235	mst1ra	85.0573	1.07146	2.10155	0.475838	0.480784	2.22856	0.0258431	0.0770277	ENSG00000164078	MST1R	ENSG00000164078	MST1R
ENSDARG00000062209	mrps5	58.3831	1.07121	2.10119	0.47592	0.207223	5.16935	2.34908e-07	4.15867e-06	ENSG00000144029	MRPS5	ENSG00000144029	MRPS5
ENSDARG00000075149	nagpa	27.0929	1.07081	2.10061	0.476053	0.27217	3.93433	8.34305e-05	0.000638852	ENSG00000103174	NAGPA	ENSG00000103174	NAGPA
ENSDARG00000035679	si:rp71-45k5.4	91.5525	1.07068	2.10043	0.476093	0.215682	4.96417	6.89938e-07	1.04617e-05	ENSG00000256646	AC010132.3
ENSDARG00000091678	ints12	114.305	1.07018	2.0997	0.476259	0.366729	2.91818	0.0035208	0.0149439	ENSG00000138785	INTS12	ENSG00000138785	INTS12
ENSDARG00000100357	si:ch73-44m9.3	61.4203	1.06996	2.09938	0.476332	0.26689	4.00899	6.09777e-05	0.000489547
ENSDARG00000045422	otulina	27.6485	1.06846	2.09719	0.476827	0.390715	2.73463	0.00624511	0.0241424	ENSG00000241127	YAE1D1	ENSG00000241127	YAE1D1
ENSDARG00000035399	ankra2	24.3072	1.06808	2.09664	0.476953	0.28991	3.68418	0.000229438	0.00151542	ENSG00000164331	ANKRA2	ENSG00000164331	ANKRA2
ENSDARG00000099439	serp1	243.195	1.06642	2.09423	0.477503	0.20282	5.25794	1.45678e-07	2.74811e-06	ENSG00000120742	SERP1	ENSG00000120742	SERP1
ENSDARG00000019595	senp8	9.67353	1.06607	2.09372	0.477619	0.343798	3.10086	0.00192961	0.0090981	ENSG00000166192	SENP8	ENSG00000166192	SENP8
ENSDARG00000040559	rad1	59.3846	1.06568	2.09315	0.477749	0.319872	3.33157	0.000863587	0.00462687	ENSG00000113456	RAD1	ENSG00000113456	RAD1
ENSDARG00000025189	cpne8	7.27335	1.0656	2.09303	0.477775	0.412659	2.58227	0.00981536	0.0348761	ENSG00000139117	CPNE8	ENSG00000139117	CPNE8
ENSDARG00000086512	prodhb	18.0263	1.06547	2.09285	0.477818	0.401956	2.6507	0.00803246	0.0296889	ENSG00000277196	AC007325.2
ENSDARG00000074117		10.2372	1.06525	2.09253	0.47789	0.323123	3.29673	0.00097817	0.00514298	ENSG00000110148	CCKBR	ENSG00000110148	CCKBR
ENSDARG00000093070	thumpd2	11.1966	1.06524	2.09252	0.477894	0.263179	4.04758	5.17494e-05	0.000425689	ENSG00000138050	THUMPD2	ENSG00000138050	THUMPD2
ENSDARG00000069956	pdlim2	119.814	1.06522	2.09249	0.477899	0.274896	3.87501	0.00010662	0.000786195	ENSG00000120913	PDLIM2	ENSG00000120913	PDLIM2
ENSDARG00000077306	cutc	24.1818	1.06515	2.09239	0.477921	0.32414	3.28609	0.00101588	0.00531228	ENSG00000119929	CUTC	ENSG00000119929	CUTC
ENSDARG00000057218	tbc1d15	54.8221	1.06498	2.09214	0.47798	0.271012	3.92963	8.50775e-05	0.000648348	ENSG00000121749	TBC1D15	ENSG00000121749	TBC1D15
ENSDARG00000074248	tmem237b	33.9882	1.06349	2.08997	0.478475	0.299385	3.55223	0.000381974	0.00232496	ENSG00000155755	TMEM237	ENSG00000155755	TMEM237
ENSDARG00000007693	nfkbiab	225.107	1.06338	2.08981	0.478511	0.260418	4.08334	4.43923e-05	0.000375493	ENSG00000100906	NFKBIA	ENSG00000100906	NFKBIA
ENSDARG00000009212	ppiaa	2973.51	1.06279	2.08896	0.478707	0.176055	6.03666	1.57337e-09	5.62973e-08
ENSDARG00000097789	pon3.2	16.1257	1.06266	2.08878	0.478748	0.345358	3.07699	0.00209104	0.00971548	ENSG00000005421	PON1
ENSDARG00000023852	lsm4	76.4641	1.06247	2.08851	0.47881	0.24326	4.36765	1.25592e-05	0.000126358	ENSG00000130520	LSM4	ENSG00000130520	LSM4
ENSDARG00000043511	prdx6	412.478	1.06234	2.08832	0.478853	0.164175	6.47079	9.74891e-11	5.01065e-09	ENSG00000117592	PRDX6	ENSG00000117592	PRDX6
ENSDARG00000061235	alg5	89.5008	1.06165	2.08732	0.479083	0.227823	4.65999	3.16218e-06	3.89176e-05	ENSG00000120697	ALG5	ENSG00000120697	ALG5
ENSDARG00000044807	dck	19.3472	1.06126	2.08676	0.479212	0.272319	3.89714	9.73365e-05	0.000727774	ENSG00000156136	DCK	ENSG00000156136	DCK
ENSDARG00000041155	morf4l1	127.908	1.06077	2.08604	0.479377	0.204227	5.19408	2.05737e-07	3.71529e-06	ENSG00000185787	MORF4L1
ENSDARG00000024479	pigk	22.8173	1.06066	2.08589	0.479412	0.340111	3.11857	0.00181728	0.00864413	ENSG00000142892	PIGK	ENSG00000142892	PIGK
ENSDARG00000057626	josd2	61.7463	1.0606	2.0858	0.479433	0.359272	2.95208	0.00315644	0.0136662	ENSG00000161677	JOSD2	ENSG00000161677	JOSD2
ENSDARG00000003206	chchd6a	63.7867	1.05991	2.0848	0.479662	0.272298	3.89247	9.92308e-05	0.000738345	ENSG00000159685	CHCHD6	ENSG00000159685	CHCHD6
ENSDARG00000074379	knstrn	30.9968	1.05977	2.08459	0.47971	0.309022	3.42943	0.000604861	0.00344473
ENSDARG00000099315	nsdhl	123.311	1.05932	2.08394	0.47986	0.264909	3.99879	6.36667e-05	0.000507133	ENSG00000147383	NSDHL	ENSG00000147383	NSDHL
ENSDARG00000102305	svbp	37.5834	1.05931	2.08393	0.479862	0.312116	3.39395	0.000688915	0.00384105	ENSG00000177868	SVBP	ENSG00000177868	SVBP
ENSDARG00000054916	eif4ebp3	76.8776	1.05884	2.08325	0.480018	0.270896	3.90866	9.2811e-05	0.000699306	ENSG00000243056	EIF4EBP3	ENSG00000243056	EIF4EBP3
ENSDARG00000033327	unc5b	20.7193	1.05849	2.08275	0.480134	0.382474	2.76748	0.00564912	0.0222115	ENSG00000107731	UNC5B	ENSG00000107731	UNC5B
ENSDARG00000035837	zgc:153595	7.3831	1.05784	2.08182	0.480349	0.411478	2.57084	0.0101452	0.0358596
ENSDARG00000057648	dnttip2	257.49	1.0574	2.08118	0.480496	0.220488	4.79575	1.62065e-06	2.20598e-05	ENSG00000067334	DNTTIP2	ENSG00000067334	DNTTIP2
ENSDARG00000090472	ttll10	6.88783	1.05732	2.08106	0.480525	0.469043	2.2542	0.0241835	0.0729448	ENSG00000162571	TTLL10	ENSG00000162571	TTLL10
ENSDARG00000101310	BX004873.5	5.18046	1.05642	2.07976	0.480825	0.485658	2.17523	0.0296132	0.0860398
ENSDARG00000030887	phf23a	94.5193	1.0554	2.0783	0.481162	0.201691	5.23279	1.66974e-07	3.09349e-06	ENSG00000040633	PHF23	ENSG00000040633	PHF23
ENSDARG00000010194	eif4bb	584.303	1.05537	2.07826	0.481172	0.156367	6.74933	1.48531e-11	9.79787e-10	ENSG00000063046	EIF4B	ENSG00000063046	EIF4B
ENSDARG00000015228	ero1a	52.6596	1.05537	2.07825	0.481173	0.202549	5.21046	1.88377e-07	3.43775e-06	ENSG00000197930	ERO1A	ENSG00000197930	ERO1A
ENSDARG00000089697	nfe2l2b	23.1232	1.05531	2.07816	0.481194	0.38977	2.70752	0.00677883	0.0258392
ENSDARG00000103298	ephx5	68.3322	1.05476	2.07738	0.481376	0.226401	4.65883	3.18011e-06	3.90918e-05	ENSG00000143819	EPHX1	ENSG00000143819	EPHX1
ENSDARG00000004311	ldlrap1a	73.6572	1.05466	2.07723	0.48141	0.455176	2.31704	0.0205016	0.0637037	ENSG00000157978	LDLRAP1	ENSG00000157978	LDLRAP1
ENSDARG00000031116	dnal4a	11.9119	1.05465	2.07722	0.481413	0.313401	3.36519	0.000764908	0.00419474	ENSG00000100246	DNAL4	ENSG00000100246	DNAL4
ENSDARG00000098627	gspt1l	853.459	1.05441	2.07687	0.481493	0.13091	8.0545	7.98051e-16	1.85731e-13	ENSG00000103342	GSPT1
ENSDARG00000020448	adi1	76.5349	1.05421	2.07659	0.481559	0.160139	6.58314	4.60618e-11	2.64694e-09	ENSG00000182551	ADI1	ENSG00000182551	ADI1
ENSDARG00000091656	lsm8	24.7688	1.05326	2.07522	0.481878	0.262513	4.01222	6.01506e-05	0.00048422	ENSG00000128534	LSM8	ENSG00000128534	LSM8
ENSDARG00000005870	mmadhc	81.0181	1.0531	2.07498	0.481932	0.204263	5.15561	2.52811e-07	4.45658e-06	ENSG00000168288	MMADHC	ENSG00000168288	MMADHC
ENSDARG00000008840	hmbsa	73.0767	1.05307	2.07494	0.481941	0.1946	5.41147	6.25102e-08	1.31985e-06	ENSG00000256269	HMBS	ENSG00000256269	HMBS
ENSDARG00000096749	NDUFAF8	8.03606	1.05221	2.0737	0.482229	0.358773	2.9328	0.00335922	0.0143938	ENSG00000224877	NDUFAF8	ENSG00000224877	NDUFAF8
ENSDARG00000087555	si:ch73-308l14.2	64.818	1.05209	2.07353	0.482269	0.20215	5.20449	1.94526e-07	3.54061e-06
ENSDARG00000013371	isoc2	76.4102	1.05203	2.07344	0.48229	0.336781	3.12377	0.00178547	0.00851739	ENSG00000063241	ISOC2	ENSG00000063241	ISOC2
ENSDARG00000058425	rab35b	106.691	1.052	2.07341	0.482298	0.259967	4.04668	5.19493e-05	0.000426825	ENSG00000111737	RAB35	ENSG00000111737	RAB35
ENSDARG00000103337	rrp1	229.489	1.05199	2.07338	0.482304	0.227404	4.62606	3.7269e-06	4.49071e-05	ENSG00000160214	RRP1
ENSDARG00000045359	tceb1b	70.4595	1.05193	2.07331	0.482322	0.185685	5.66515	1.46894e-08	3.77966e-07	ENSG00000154582	ELOC	ENSG00000154582	ELOC
ENSDARG00000069649	tmem160	14.4395	1.05155	2.07276	0.482449	0.239082	4.39828	1.09114e-05	0.000112163	ENSG00000130748	TMEM160	ENSG00000130748	TMEM160
ENSDARG00000069386	mtg1	18.2372	1.05107	2.07207	0.48261	0.341137	3.08108	0.00206249	0.00960441	ENSG00000254536	AL360181.3
ENSDARG00000070097	vimp	260.025	1.05086	2.07176	0.482682	0.166546	6.3097	2.79568e-10	1.29836e-08	ENSG00000131871	SELENOS	ENSG00000131871	SELENOS
ENSDARG00000032326	mecr	35.5043	1.05015	2.07075	0.482917	0.289055	3.63305	0.000280086	0.0017961	ENSG00000116353	MECR	ENSG00000116353	MECR
ENSDARG00000056583	ndufs6	45.2597	1.04987	2.07034	0.483012	0.277229	3.78701	0.000152471	0.00106874	ENSG00000145494	NDUFS6	ENSG00000145494	NDUFS6
ENSDARG00000062372	nrd1b	32.1878	1.04977	2.07019	0.483047	0.294033	3.57023	0.000356665	0.00220131	ENSG00000078618	NRDC	ENSG00000078618	NRDC
ENSDARG00000092136	cenpw	19.4582	1.04975	2.07017	0.483051	0.312157	3.36289	0.0007713	0.00422085	ENSG00000203760	CENPW	ENSG00000203760	CENPW
ENSDARG00000056479	rab1bb	44.4734	1.04967	2.07005	0.48308	0.183489	5.72061	1.06142e-08	2.88143e-07	ENSG00000174903	RAB1B	ENSG00000174903	RAB1B
ENSDARG00000100584	ccdc40	68.2029	1.04925	2.06945	0.483219	0.37309	2.81232	0.0049185	0.0198011	ENSG00000141519	CCDC40	ENSG00000141519	CCDC40
ENSDARG00000007196	rae1	109.207	1.04895	2.06902	0.48332	0.186706	5.61818	1.92978e-08	4.79274e-07	ENSG00000101146	RAE1	ENSG00000101146	RAE1
ENSDARG00000016368	zbtb8os	16.5034	1.04888	2.06893	0.483343	0.387204	2.70886	0.0067515	0.0257492	ENSG00000176261	ZBTB8OS	ENSG00000176261	ZBTB8OS
ENSDARG00000041417	atp6ap1a	11.084	1.04842	2.06827	0.483497	0.459546	2.28143	0.0225233	0.0688009	ENSG00000071553	ATP6AP1	ENSG00000071553	ATP6AP1
ENSDARG00000070427	s100v1	52.5653	1.04837	2.06819	0.483515	0.406691	2.5778	0.00994323	0.0352359
ENSDARG00000017696	diexf	111.477	1.04725	2.06659	0.483888	0.306804	3.41343	0.000641514	0.00361865	ENSG00000117597	DIEXF	ENSG00000117597	DIEXF
ENSDARG00000075025	cdc123	35.6469	1.04714	2.06643	0.483926	0.233403	4.48642	7.24307e-06	7.94207e-05	ENSG00000151465	CDC123	ENSG00000151465	CDC123
ENSDARG00000069496	arl2	49.2887	1.04652	2.06554	0.484135	0.289397	3.6162	0.000298955	0.00190005	ENSG00000213465	ARL2
ENSDARG00000054023	ttll6	48.2191	1.04542	2.06397	0.484504	0.280847	3.72238	0.000197353	0.00133152	ENSG00000170703	TTLL6	ENSG00000170703	TTLL6
ENSDARG00000007836	ctsla	684.105	1.04506	2.06345	0.484625	0.189291	5.52091	3.37252e-08	7.67996e-07	ENSG00000135047	CTSL
ENSDARG00000062053	kif1bp	86.4204	1.04499	2.06336	0.484647	0.146402	7.13783	9.48129e-13	9.5333e-11	ENSG00000198954	KIF1BP	ENSG00000198954	KIF1BP
ENSDARG00000020841	rbm7	119.018	1.04482	2.0631	0.484707	0.427367	2.44477	0.0144943	0.047905	ENSG00000255663	AP002373.1
ENSDARG00000093699	si:ch73-27e22.4	17.2384	1.04428	2.06233	0.484887	0.433145	2.41092	0.0159122	0.0516761
ENSDARG00000037958	nosip	37.0912	1.04411	2.0621	0.484942	0.207954	5.02089	5.1432e-07	8.13214e-06	ENSG00000142546	NOSIP	ENSG00000142546	NOSIP
ENSDARG00000003151	skp1	392.419	1.04376	2.0616	0.485061	0.171603	6.08243	1.18375e-09	4.44993e-08	ENSG00000272772	AC104109.3
ENSDARG00000037909	TIMM29	39.9611	1.04375	2.06158	0.485065	0.209165	4.99007	6.03589e-07	9.30911e-06	ENSG00000142444	TIMM29	ENSG00000142444	TIMM29
ENSDARG00000052030	akr1a1b	83.2311	1.04327	2.0609	0.485226	0.198866	5.2461	1.5535e-07	2.90208e-06	ENSG00000117448	AKR1A1	ENSG00000117448	AKR1A1
ENSDARG00000045364	trappc3	58.1922	1.04293	2.0604	0.485342	0.277632	3.75651	0.000172302	0.00118082	ENSG00000054116	TRAPPC3	ENSG00000054116	TRAPPC3
ENSDARG00000088030	rpl35a	1284.34	1.04284	2.06027	0.485373	0.234104	4.45459	8.40548e-06	8.99159e-05	ENSG00000182899	RPL35A	ENSG00000182899	RPL35A
ENSDARG00000098338	si:ch73-340n8.4	31.9887	1.04275	2.06015	0.485402	0.30498	3.41908	0.000628341	0.00355799
ENSDARG00000067605	napaa	14.8527	1.04255	2.05986	0.48547	0.345804	3.01484	0.00257111	0.0115446	ENSG00000105402	NAPA	ENSG00000105402	NAPA
ENSDARG00000053636	cracr2b	33.0377	1.042	2.05909	0.485652	0.239285	4.35465	1.33281e-05	0.000133171	ENSG00000177685	CRACR2B	ENSG00000177685	CRACR2B
ENSDARG00000086628	stk19	6.03179	1.04187	2.0589	0.485696	0.487703	2.13629	0.0326558	0.0929504	ENSG00000204344	STK19	ENSG00000204344	STK19
ENSDARG00000008732	zgc:66479	130.519	1.04163	2.05855	0.485778	0.249267	4.17877	2.93087e-05	0.000263944
ENSDARG00000003749	polb	60.379	1.04154	2.05843	0.485808	0.276569	3.76594	0.000165926	0.00114447	ENSG00000070501	POLB	ENSG00000070501	POLB
ENSDARG00000078059	nudcd2	31.0455	1.04152	2.0584	0.485815	0.251613	4.13938	3.4825e-05	0.000305908	ENSG00000170584	NUDCD2	ENSG00000170584	NUDCD2
ENSDARG00000097740	tceb2	27.5689	1.04151	2.05839	0.485817	0.262216	3.97197	7.12817e-05	0.000558207
ENSDARG00000102449	CABZ01048402.1	11.5898	1.04137	2.05817	0.485867	0.420509	2.47644	0.01327	0.0446447
ENSDARG00000007755	wdr61	54.7849	1.04028	2.05663	0.486233	0.231323	4.4971	6.88872e-06	7.61398e-05	ENSG00000140395	WDR61	ENSG00000140395	WDR61
ENSDARG00000053138	lrrc47	94.2257	1.04021	2.05652	0.486258	0.177393	5.86385	4.52266e-09	1.38782e-07	ENSG00000130764	LRRC47	ENSG00000130764	LRRC47
ENSDARG00000061060	stpg2	24.3955	1.0402	2.05652	0.486259	0.469685	2.21468	0.0267818	0.0794233	ENSG00000163116	STPG2	ENSG00000163116	STPG2
ENSDARG00000013302	gpx8	87.1034	1.04016	2.05645	0.486274	0.375126	2.77282	0.0055572	0.0219459	ENSG00000164294	GPX8	ENSG00000164294	GPX8
ENSDARG00000039378	rcn2	16.4924	1.04013	2.05642	0.486282	0.324729	3.20309	0.00135963	0.0067844	ENSG00000117906	RCN2	ENSG00000117906	RCN2
ENSDARG00000036136	tipin	84.1195	1.0401	2.05638	0.486292	0.347491	2.99318	0.00276083	0.0122504	ENSG00000075131	TIPIN	ENSG00000075131	TIPIN
ENSDARG00000058451	rpl6	3400.21	1.03989	2.05607	0.486365	0.193834	5.36485	8.10185e-08	1.65228e-06	ENSG00000089009	RPL6	ENSG00000089009	RPL6
ENSDARG00000057556	rpl17	2076.82	1.03977	2.05591	0.486403	0.194744	5.33919	9.33648e-08	1.87572e-06	ENSG00000215472	RPL17-C18orf32
ENSDARG00000036781	si:dkey-170l10.1	11.8589	1.03968	2.05577	0.486437	0.440861	2.35828	0.0183597	0.0583437	ENSG00000137814	HAUS2	ENSG00000137814	HAUS2
ENSDARG00000078130	CR391986.1	20.3595	1.03961	2.05567	0.486458	0.443921	2.34188	0.0191867	0.0603422	ENSG00000104714	ERICH1	ENSG00000104714	ERICH1
ENSDARG00000058502	olah	19.7786	1.03961	2.05567	0.486459	0.270162	3.84809	0.00011904	0.000866067	ENSG00000152463	OLAH	ENSG00000152463	OLAH
ENSDARG00000075422		68.2122	1.03926	2.05517	0.486578	0.184427	5.63506	1.74998e-08	4.40429e-07	ENSG00000149792	MRPL49	ENSG00000149792	MRPL49
ENSDARG00000104587	srl	389.975	1.0391	2.05494	0.486632	0.309237	3.36019	0.000778878	0.00425558	ENSG00000185739	SRL	ENSG00000185739	SRL
ENSDARG00000089303	BX572619.1	199.403	1.03862	2.05426	0.486794	0.347418	2.98953	0.00279406	0.012374	ENSG00000171067	C11orf24	ENSG00000171067	C11orf24
ENSDARG00000053805	trub1	24.8314	1.03809	2.05351	0.486971	0.309109	3.35834	0.000784123	0.00427747	ENSG00000165832	TRUB1	ENSG00000165832	TRUB1
ENSDARG00000055426	rwdd2b	33.4199	1.03788	2.05321	0.487042	0.226104	4.59028	4.42656e-06	5.18007e-05	ENSG00000156253	RWDD2B	ENSG00000156253	RWDD2B
ENSDARG00000035610	zgc:113208	28.989	1.03776	2.05303	0.487084	0.48517	2.13896	0.0324393	0.0925078
ENSDARG00000041724	glipr2	16.77	1.03721	2.05225	0.48727	0.413869	2.50612	0.0122065	0.0417422
ENSDARG00000104227	nop10	103.861	1.03715	2.05217	0.487289	0.296611	3.49667	0.000471106	0.00278721	ENSG00000182117	NOP10	ENSG00000182117	NOP10
ENSDARG00000098130	bola3	25.9567	1.03715	2.05217	0.487289	0.277051	3.74354	0.000181448	0.00123508	ENSG00000163170	BOLA3	ENSG00000163170	BOLA3
ENSDARG00000042344	trmt6	51.4811	1.03712	2.05212	0.4873	0.348404	2.97677	0.00291307	0.0128107	ENSG00000089195	TRMT6	ENSG00000089195	TRMT6
ENSDARG00000104571	gadd45ab	50.6956	1.03702	2.05199	0.487333	0.239928	4.32221	1.54475e-05	0.000151069	ENSG00000116717	GADD45A	ENSG00000116717	GADD45A
ENSDARG00000042124	si:dkey-4e7.3	243.932	1.03667	2.05148	0.487452	0.290387	3.56995	0.000357049	0.00220237
ENSDARG00000057635	wdr34	37.7309	1.03667	2.05148	0.487453	0.38824	2.67017	0.00758131	0.0283144	ENSG00000119333	WDR34	ENSG00000119333	WDR34
ENSDARG00000095086	cfdp1	45.9928	1.0361	2.05068	0.487643	0.255194	4.06006	4.90608e-05	0.000406967	ENSG00000153774	CFDP1	ENSG00000153774	CFDP1
ENSDARG00000056985	tpte	71.7971	1.03605	2.05061	0.487659	0.205091	5.05169	4.37908e-07	7.09179e-06	ENSG00000274391	TPTE
ENSDARG00000038567	tsr3	41.065	1.03551	2.04984	0.487843	0.19821	5.22432	1.74797e-07	3.22114e-06	ENSG00000007520	TSR3	ENSG00000007520	TSR3
ENSDARG00000056318	kansl2	168.856	1.03434	2.04818	0.488239	0.290501	3.56054	0.000370092	0.00226461	ENSG00000139620	KANSL2	ENSG00000139620	KANSL2
ENSDARG00000006300	psmd9	36.8922	1.0332	2.04656	0.488626	0.272489	3.7917	0.000149621	0.0010509	ENSG00000256950	AC069503.2
ENSDARG00000061505	mrps9	72.7877	1.03298	2.04624	0.4887	0.189471	5.4519	4.98335e-08	1.08997e-06	ENSG00000135972	MRPS9	ENSG00000135972	MRPS9
ENSDARG00000054220	ap4s1	7.7442	1.03285	2.04606	0.488745	0.479981	2.15185	0.0314094	0.0900711	ENSG00000100478	AP4S1	ENSG00000100478	AP4S1
ENSDARG00000098639	pycr1b	392.567	1.03251	2.04558	0.488858	0.297226	3.47382	0.000513103	0.00299969	ENSG00000143811	PYCR2
ENSDARG00000068828	bloc1s3	16.0717	1.03203	2.04491	0.48902	0.28854	3.57675	0.000347898	0.00215754	ENSG00000189114	BLOC1S3
ENSDARG00000037891	mlx	76.0676	1.03202	2.04488	0.489026	0.192368	5.36479	8.10435e-08	1.65228e-06	ENSG00000108788	MLX	ENSG00000108788	MLX
ENSDARG00000089877	si:dkeyp-75h12.5	22.1501	1.03129	2.04386	0.489271	0.247268	4.17075	3.03599e-05	0.000271975	ENSG00000243449	C4orf48	ENSG00000243449	C4orf48
ENSDARG00000009743	efhc1	139.992	1.03119	2.04371	0.489306	0.473083	2.17973	0.0292776	0.0852681	ENSG00000096093	EFHC1	ENSG00000096093	EFHC1
ENSDARG00000035043	pfdn5	116.826	1.03108	2.04355	0.489344	0.175543	5.87365	4.26298e-09	1.31987e-07	ENSG00000123349	PFDN5	ENSG00000123349	PFDN5
ENSDARG00000045562	pus1	71.0337	1.03059	2.04286	0.48951	0.338963	3.04042	0.00236251	0.0107525	ENSG00000177192	PUS1	ENSG00000177192	PUS1
ENSDARG00000101557	scarb1	514.661	1.0303	2.04245	0.489608	0.391777	2.62982	0.00854312	0.0311593	ENSG00000073060	SCARB1	ENSG00000073060	SCARB1
ENSDARG00000061256		74.2581	1.03005	2.04209	0.489694	0.23248	4.43069	9.39318e-06	9.88623e-05	ENSG00000172366	MCRIP2	ENSG00000172366	MCRIP2
ENSDARG00000068820	h2afva	235.211	1.03	2.04202	0.489712	0.391412	2.63149	0.00850126	0.0310285	ENSG00000105968	H2AFV	ENSG00000105968	H2AFV
ENSDARG00000029663	rab1ab	225.59	1.02993	2.04193	0.489733	0.216303	4.76154	1.92124e-06	2.54441e-05
ENSDARG00000069846	zgc:162944	138.938	1.0296	2.04146	0.489846	0.221954	4.6388	3.50441e-06	4.24733e-05
ENSDARG00000019142	fam185a	18.4332	1.02928	2.041	0.489955	0.382152	2.69338	0.00707318	0.0267592	ENSG00000222011	FAM185A	ENSG00000222011	FAM185A
ENSDARG00000056281	cyb561a3a	12.301	1.02926	2.04098	0.48996	0.32413	3.17547	0.00149593	0.00733203	ENSG00000162144	CYB561A3	ENSG00000162144	CYB561A3
ENSDARG00000038186		20.3984	1.02826	2.03956	0.490301	0.342014	3.00649	0.00264282	0.0118098	ENSG00000278023	RDM1	ENSG00000278023	RDM1
ENSDARG00000102412	eci2	291.839	1.02798	2.03916	0.490398	0.195502	5.25813	1.45528e-07	2.74779e-06	ENSG00000198721	ECI2	ENSG00000198721	ECI2
ENSDARG00000090998	si:cabz01071911.3	31.3975	1.02776	2.03885	0.490472	0.249091	4.12602	3.69089e-05	0.000320543
ENSDARG00000042671	c2h1orf27	46.8095	1.02703	2.03782	0.490721	0.229145	4.48199	7.39507e-06	8.08733e-05	ENSG00000157181	C1orf27	ENSG00000157181	C1orf27
ENSDARG00000074242	serbp1a	3261.88	1.02696	2.03773	0.490742	0.195134	5.26287	1.41826e-07	2.70003e-06	ENSG00000142864	SERBP1	ENSG00000142864	SERBP1
ENSDARG00000005673	f3b	35.1526	1.02684	2.03755	0.490785	0.335956	3.05646	0.0022397	0.0102567	ENSG00000117525	F3	ENSG00000117525	F3
ENSDARG00000042759	cnstb	11.6606	1.02647	2.03704	0.49091	0.394551	2.60162	0.00927844	0.0333596	ENSG00000162852	CNST	ENSG00000162852	CNST
ENSDARG00000042123	nudt3b	9.93532	1.02642	2.03697	0.490925	0.346404	2.96308	0.00304575	0.013287	ENSG00000272325	NUDT3	ENSG00000272325	NUDT3
ENSDARG00000075297	trnt1	54.789	1.02628	2.03677	0.490974	0.18012	5.69776	1.21394e-08	3.22362e-07	ENSG00000072756	TRNT1	ENSG00000072756	TRNT1
ENSDARG00000101341	si:ch211-262i1.6	88.9802	1.0259	2.03623	0.491103	0.207512	4.94383	7.6604e-07	1.14812e-05	ENSG00000228300	C19orf24	ENSG00000228300	C19orf24
ENSDARG00000053695	zgc:162948	36.2369	1.0256	2.0358	0.491207	0.418851	2.4486	0.0143414	0.0475133
ENSDARG00000086416	med11	24.0968	1.02526	2.03532	0.491323	0.256551	3.99631	6.43383e-05	0.00051157	ENSG00000161920	MED11	ENSG00000161920	MED11
ENSDARG00000069082	rnmtl1b	35.1788	1.02503	2.035	0.4914	0.395871	2.5893	0.00961704	0.0343158	ENSG00000171861	MRM3	ENSG00000171861	MRM3
ENSDARG00000058666	dennd2da	54.2442	1.02488	2.03478	0.491453	0.484878	2.11368	0.034543	0.0971778	ENSG00000162777	DENND2D	ENSG00000162777	DENND2D
ENSDARG00000056075	rca2.1	297.965	1.02462	2.03443	0.491538	0.291199	3.51865	0.000433753	0.00259458
ENSDARG00000035573		46.4321	1.02447	2.03421	0.491592	0.254763	4.02125	5.78905e-05	0.000469126	ENSG00000085231	AK6	ENSG00000085231	AK6
ENSDARG00000035697	spinb	19.2333	1.02419	2.03382	0.491687	0.472093	2.16947	0.0300473	0.0869959	ENSG00000186787	SPIN2B
ENSDARG00000099667	snrpg	55.87	1.02405	2.03362	0.491733	0.313574	3.26574	0.00109178	0.00564609	ENSG00000143977	SNRPG	ENSG00000143977	SNRPG
ENSDARG00000071396	timm23a	123.381	1.02405	2.03362	0.491735	0.199123	5.14279	2.70693e-07	4.70519e-06	ENSG00000204152	TIMM23B
ENSDARG00000022845	lias	43.3228	1.02404	2.0336	0.491738	0.239135	4.28226	1.85007e-05	0.000176837	ENSG00000121897	LIAS	ENSG00000121897	LIAS
ENSDARG00000071336	mif	62.636	1.02402	2.03358	0.491743	0.310427	3.29875	0.00097115	0.00511582	ENSG00000240972	MIF	ENSG00000240972	MIF
ENSDARG00000055797	cnpy4	20.8783	1.02402	2.03358	0.491744	0.334308	3.06311	0.00219053	0.0100783	ENSG00000166997	CNPY4	ENSG00000166997	CNPY4
ENSDARG00000054867	hibch	79.3578	1.02376	2.03322	0.491831	0.230449	4.44249	8.89258e-06	9.43123e-05	ENSG00000198130	HIBCH	ENSG00000198130	HIBCH
ENSDARG00000045262	gsnb	82.4251	1.02356	2.03294	0.491899	0.224795	4.55333	5.28039e-06	6.02937e-05	ENSG00000148180	GSN	ENSG00000148180	GSN
ENSDARG00000058354	selt1a	196.981	1.02283	2.03191	0.492148	0.183622	5.57034	2.54245e-08	6.13774e-07	ENSG00000198843	SELENOT	ENSG00000198843	SELENOT
ENSDARG00000054789	lysmd1	44.6289	1.0227	2.03172	0.492194	0.335641	3.04701	0.00231127	0.0105378	ENSG00000163155	LYSMD1	ENSG00000163155	LYSMD1
ENSDARG00000045565	noc4l	93.1865	1.02216	2.03096	0.492377	0.198663	5.14521	2.67218e-07	4.65899e-06	ENSG00000184967	NOC4L	ENSG00000184967	NOC4L
ENSDARG00000074662	cntf	8.5125	1.02166	2.03025	0.492551	0.365851	2.79255	0.00522952	0.0208627
ENSDARG00000012672	gtf2e2	76.4777	1.02147	2.02999	0.492614	0.226041	4.51896	6.21446e-06	6.96914e-05	ENSG00000197265	GTF2E2	ENSG00000197265	GTF2E2
ENSDARG00000102725	CABZ01081909.1	33.6917	1.02108	2.02943	0.492748	0.368925	2.76771	0.00564523	0.0222089	ENSG00000109881	CCDC34	ENSG00000109881	CCDC34
ENSDARG00000057011	dpm1	51.4351	1.02098	2.0293	0.492782	0.21347	4.78277	1.72892e-06	2.32539e-05	ENSG00000000419	DPM1	ENSG00000000419	DPM1
ENSDARG00000012929	eif2d	59.23	1.02066	2.02885	0.49289	0.228751	4.4619	8.12365e-06	8.73198e-05	ENSG00000143486	EIF2D	ENSG00000143486	EIF2D
ENSDARG00000087262	zgc:63568	17.0149	1.02054	2.02868	0.492931	0.379968	2.68586	0.00723424	0.0272441	ENSG00000196616	ADH1B
ENSDARG00000104256	bco1	411.531	1.02027	2.02829	0.493026	0.249037	4.09685	4.18813e-05	0.000357138	ENSG00000135697	BCO1	ENSG00000135697	BCO1
ENSDARG00000027915	zc2hc1a	59.1254	1.0199	2.02777	0.493151	0.224046	4.55217	5.30948e-06	6.05277e-05	ENSG00000104427	ZC2HC1A	ENSG00000104427	ZC2HC1A
ENSDARG00000078508		27.0475	1.01975	2.02756	0.493203	0.375514	2.7156	0.0066155	0.0253004	ENSG00000135253	KCP	ENSG00000135253	KCP
ENSDARG00000026806	taf8	49.0984	1.01911	2.02667	0.49342	0.219975	4.63285	3.6066e-06	4.36353e-05	ENSG00000137413	TAF8	ENSG00000137413	TAF8
ENSDARG00000042069	pebp1	87.0566	1.01776	2.02477	0.493882	0.287962	3.53437	0.000408755	0.00246622	ENSG00000089220	PEBP1	ENSG00000089220	PEBP1
ENSDARG00000091821	smc6	50.3613	1.01753	2.02445	0.493961	0.390474	2.60589	0.00916359	0.0330269	ENSG00000163029	SMC6	ENSG00000163029	SMC6
ENSDARG00000032919	chchd3a	157.621	1.01726	2.02406	0.494055	0.164231	6.19406	5.86353e-10	2.41935e-08	ENSG00000106554	CHCHD3	ENSG00000106554	CHCHD3
ENSDARG00000013950	pdf	11.3702	1.01719	2.02398	0.494077	0.30445	3.34108	0.000834524	0.00449909	ENSG00000258429	PDF	ENSG00000258429	PDF
ENSDARG00000036456	anxa4	343.327	1.01707	2.02381	0.494118	0.220466	4.61327	3.96376e-06	4.7239e-05	ENSG00000196975	ANXA4	ENSG00000196975	ANXA4
ENSDARG00000054793	emc10	93.3705	1.01678	2.02339	0.49422	0.174169	5.83788	5.28698e-09	1.57341e-07	ENSG00000161671	EMC10	ENSG00000161671	EMC10
ENSDARG00000098059	fkbp3	36.6872	1.01624	2.02264	0.494402	0.439257	2.31355	0.0206926	0.0641817	ENSG00000100442	FKBP3	ENSG00000100442	FKBP3
ENSDARG00000040443	polr2i	36.0552	1.0162	2.02259	0.494416	0.285939	3.55391	0.000379549	0.00231156	ENSG00000105258	POLR2I	ENSG00000105258	POLR2I
ENSDARG00000032010	slc15a2	310.348	1.01541	2.02147	0.494689	0.252235	4.02564	5.68197e-05	0.000461532	ENSG00000163406	SLC15A2	ENSG00000163406	SLC15A2
ENSDARG00000042873	slc25a27	17.1666	1.01496	2.02085	0.494842	0.475306	2.13538	0.0327299	0.0931102	ENSG00000153291	SLC25A27	ENSG00000153291	SLC25A27
ENSDARG00000074895	tysnd1	19.392	1.01437	2.02002	0.495043	0.285771	3.5496	0.000385814	0.00234419	ENSG00000156521	TYSND1	ENSG00000156521	TYSND1
ENSDARG00000078195	fhit	18.0211	1.01436	2.02001	0.495048	0.325267	3.11854	0.00181747	0.00864413	ENSG00000189283	FHIT	ENSG00000189283	FHIT
ENSDARG00000068870	fance	17.0316	1.01419	2.01977	0.495105	0.268887	3.77182	0.000162063	0.0011223	ENSG00000112039	FANCE	ENSG00000112039	FANCE
ENSDARG00000069313	oxa1l	87.4086	1.01327	2.01848	0.495422	0.2229	4.54584	5.47166e-06	6.22034e-05	ENSG00000155463	OXA1L	ENSG00000155463	OXA1L
ENSDARG00000104771	timm44	77.7526	1.0129	2.01797	0.495549	0.163923	6.17913	6.44558e-10	2.6281e-08	ENSG00000104980	TIMM44	ENSG00000104980	TIMM44
ENSDARG00000039266	rbm25a	19.24	1.01287	2.01792	0.495559	0.30715	3.29765	0.000974991	0.00512965	ENSG00000119707	RBM25	ENSG00000119707	RBM25
ENSDARG00000016470	anxa5b	167.144	1.01283	2.01787	0.495572	0.178092	5.68715	1.29174e-08	3.3954e-07	ENSG00000164111	ANXA5	ENSG00000164111	ANXA5
ENSDARG00000007387	irf2a	63.104	1.01254	2.01746	0.495674	0.285318	3.54881	0.000386982	0.00234991	ENSG00000168310	IRF2	ENSG00000168310	IRF2
ENSDARG00000055770	dffa	52.8015	1.01202	2.01673	0.495853	0.246503	4.10549	4.03467e-05	0.000345474	ENSG00000160049	DFFA	ENSG00000160049	DFFA
ENSDARG00000016238	arl6ip5b	67.937	1.01162	2.01617	0.49599	0.276134	3.6635	0.000248791	0.0016287	ENSG00000144746	ARL6IP5	ENSG00000144746	ARL6IP5
ENSDARG00000103582	znf1166	10.9766	1.01062	2.01477	0.496334	0.394302	2.56305	0.0103756	0.0365928
ENSDARG00000061634	aifm4	26.8045	1.01049	2.0146	0.496377	0.391334	2.58217	0.0098181	0.0348761
ENSDARG00000035625	snrnp27	70.2805	1.01033	2.01437	0.496433	0.246182	4.10401	4.06058e-05	0.000347262	ENSG00000124380	SNRNP27	ENSG00000124380	SNRNP27
ENSDARG00000057184	zgc:55781	114.678	1.01022	2.01422	0.49647	0.349455	2.89085	0.00384203	0.0161158	ENSG00000136197	C7orf25	ENSG00000136197	C7orf25
ENSDARG00000057365	elovl8b	30.3336	1.01013	2.01409	0.496502	0.229419	4.403	1.06765e-05	0.000110322
ENSDARG00000022652	psmf1	54.0935	1.00973	2.01354	0.496638	0.269131	3.75184	0.000175544	0.00119962	ENSG00000125818	PSMF1	ENSG00000125818	PSMF1
ENSDARG00000100296	pja2	142.109	1.0095	2.01321	0.49672	0.365459	2.76226	0.00574021	0.0225013	ENSG00000198961	PJA2
ENSDARG00000037432	haus7	41.4081	1.00912	2.01268	0.496851	0.354383	2.84753	0.00440605	0.0180825	ENSG00000213397	HAUS7	ENSG00000213397	HAUS7
ENSDARG00000044628	dtd1	49.9311	1.00858	2.01193	0.497035	0.193293	5.21789	1.80974e-07	3.32315e-06	ENSG00000125821	DTD1	ENSG00000125821	DTD1
ENSDARG00000087193	prrg2	82.6282	1.00677	2.00941	0.497658	0.423936	2.37482	0.0175573	0.0561905	ENSG00000126460	PRRG2	ENSG00000126460	PRRG2
ENSDARG00000035009	trim35-27	19.6602	1.00592	2.00822	0.497954	0.358623	2.80494	0.00503255	0.0201911	ENSG00000104228	TRIM35	ENSG00000104228	TRIM35
ENSDARG00000025858	zgc:56525	104.636	1.00546	2.00758	0.498111	0.177433	5.66671	1.45561e-08	3.75002e-07	ENSG00000135052	GOLM1	ENSG00000135052	GOLM1
[truncated: 10,458 more rows]

## Sheet: Mut_test_vs_WT_test
gene ID	gene name	baseMean	log2FoldChange	FoldUpMuVW	FoldDownMuVW	lfcSE	stat	pvalue	padj	human gene ID (multi)	gene name
ENSDARG00000079681	CABZ01059627.2	139.73	17.8666	238999	4.18412e-06	2.4815	7.19994	6.02378e-13	2.5924e-10
ENSDARG00000092090	si:ch211-125e6.12	167.975	16.8191	115627	8.64851e-06	2.83166	5.93966	2.85614e-09	3.74982e-07
ENSDARG00000086247	zgc:171781	207.193	16.4653	90477.2	1.10525e-05	2.5105	6.55855	5.43332e-11	1.42727e-08
ENSDARG00000088069	CR759879.1	6.25207	7.84845	230.473	0.00433891	2.06853	3.79422	0.000148111	0.00287508	ENSG00000185745	IFIT1
ENSDARG00000101800	CABZ01088271.1	7.23936	5.56585	47.3684	0.0211111	1.57534	3.53311	0.000410705	0.00617187	ENSG00000179988	PSTK
ENSDARG00000045089	si:ch211-270n8.1	180.128	4.72783	26.4983	0.0377383	0.874046	5.40913	6.33307e-08	5.69329e-06	ENSG00000132703	APCS
ENSDARG00000056498	crp	60.7062	4.59828	24.2226	0.0412837	1.17905	3.9	9.61927e-05	0.00205242
ENSDARG00000020610	tnnt2a	2.29981	4.33802	20.2243	0.0494456	1.48094	2.92922	0.0033981	0.0299052	ENSG00000118194	TNNT2
ENSDARG00000040261	runx2a	5.77516	4.27654	19.3806	0.051598	1.27603	3.35145	0.00080389	0.0105124	ENSG00000124813	RUNX2
ENSDARG00000098174		6.34996	4.18717	18.2165	0.0548954	1.73311	2.41599	0.0156924	0.0870092	ENSG00000196177	ACADSB
ENSDARG00000043932	stmn4l	2.423	3.82034	14.1266	0.0707884	1.13992	3.35141	0.000804005	0.0105124	ENSG00000015592	STMN4
ENSDARG00000103642	pglyrp6	186.465	3.73127	13.2808	0.0752964	1.32851	2.80861	0.00497552	0.0392409	ENSG00000161031	PGLYRP2
ENSDARG00000045835	si:dkey-14d8.6	356.929	3.6624	12.6617	0.0789785	1.15958	3.15837	0.00158652	0.0171847
ENSDARG00000043171	CELA1 (1 of many)	158.64	3.50641	11.3641	0.0879965	1.16454	3.01097	0.0026041	0.024706	ENSG00000139610	CELA1
ENSDARG00000008010	zgc:194189	1.95638	3.48942	11.2311	0.0890386	1.20905	2.88608	0.00390074	0.0329734
ENSDARG00000104213	si:dkey-283b1.6	46.7555	3.48906	11.2283	0.089061	1.39277	2.50513	0.0122407	0.0741963
ENSDARG00000043198	si:rp71-1i20.2	9.27161	3.48898	11.2276	0.089066	1.38742	2.51473	0.0119122	0.07286
ENSDARG00000055514	icn2	42.2047	3.48161	11.1704	0.0895222	1.41303	2.46393	0.0137422	0.0801741
ENSDARG00000077220	si:ch211-208f21.3	1.84717	3.46722	11.0595	0.0904197	1.46078	2.37353	0.0176188	0.0939178
ENSDARG00000096990	si:ch1073-340i21.2	25.1051	3.40758	10.6117	0.0942356	1.05466	3.23097	0.00123371	0.0143601
ENSDARG00000096979	NPC2 (1 of many)	2.57856	3.38368	10.4373	0.09581	1.32569	2.5524	0.0106984	0.0675454	ENSG00000119655	NPC2
ENSDARG00000077058	CELA1 (1 of many)	285.946	3.37047	10.3422	0.096691	1.42012	2.37337	0.0176264	0.0939223	ENSG00000139610	CELA1
ENSDARG00000095384	si:dkey-78l4.2	1.85164	3.34331	10.1493	0.0985286	1.22699	2.72481	0.0064339	0.0469475
ENSDARG00000092947	cyt1	66.6023	3.31475	9.95039	0.100499	0.867844	3.81953	0.000133709	0.00265932	ENSG00000186393	KRT26
ENSDARG00000013856	amy2a	3306.14	3.29226	9.79646	0.102078	1.16543	2.82494	0.00472902	0.0377631	ENSG00000237763	AMY1A
ENSDARG00000070173	gria2a	8.48306	3.25837	9.56904	0.104504	0.539317	6.04166	1.52532e-09	2.2357e-07	ENSG00000120251	GRIA2
ENSDARG00000061692	yjefn3	3.33917	3.23436	9.41107	0.106258	0.999357	3.23644	0.0012103	0.0141753	ENSG00000250067	YJEFN3
ENSDARG00000095142		1.83252	3.21495	9.28528	0.107697	0.869988	3.69539	0.00021955	0.00389205	ENSG00000119321	FKBP15
ENSDARG00000043722	cpa4	394.514	3.20878	9.24568	0.108159	1.04822	3.06116	0.00220478	0.0217967	ENSG00000158516	CPA2
ENSDARG00000043173	CELA1 (1 of many)	246.666	3.19541	9.1604	0.109166	1.28251	2.49152	0.0127198	0.0759846	ENSG00000139610	CELA1
ENSDARG00000091609	spink4	71.071	3.09647	8.55326	0.116915	1.00019	3.09588	0.00196233	0.0201892	ENSG00000122711	SPINK4
ENSDARG00000089963	hbbe1.1	6.3629	3.06322	8.35837	0.119641	1.21049	2.53056	0.0113879	0.0705844	ENSG00000196565	HBG2
ENSDARG00000099751	si:dkey-250k10.4	1.69399	3.06121	8.34672	0.119807	1.30157	2.35194	0.0186758	0.0977626
ENSDARG00000036832	cyt1l	6.40632	2.9843	7.91343	0.126367	1.21066	2.46501	0.0137009	0.0800483	ENSG00000186393	KRT26
ENSDARG00000093608	ccl34b.1	3.93558	2.97188	7.84558	0.12746	0.881845	3.37007	0.000751486	0.00998706
ENSDARG00000104576	si:ch211-152c8.5	96.6243	2.94603	7.70626	0.129765	1.00424	2.93359	0.00335065	0.0295825	ENSG00000219607	PPP1R3G
ENSDARG00000097890	si:ch1073-100f3.2	2.79088	2.91905	7.56349	0.132214	1.09935	2.65526	0.00792466	0.054447	ENSG00000183048	SLC25A10
ENSDARG00000038703	hkdc1	332.511	2.86808	7.30091	0.136969	0.541959	5.29206	1.20948e-07	9.59376e-06	ENSG00000156510	HKDC1
ENSDARG00000029069	tnni2a.4	369.597	2.83886	7.15452	0.139772	0.920646	3.08355	0.00204548	0.0207868	ENSG00000130598	TNNI2
ENSDARG00000078976	nanos1	6.59204	2.83684	7.14454	0.139967	0.68901	4.11727	3.83381e-05	0.00099097	ENSG00000188613	NANOS1
ENSDARG00000089432	si:ch211-212k18.15	5.2082	2.82908	7.10619	0.140722	0.927051	3.0517	0.00227553	0.0223108
ENSDARG00000039730	zgc:112160	3693.5	2.82647	7.09335	0.140977	1.073	2.63418	0.00843398	0.0570369
ENSDARG00000094760	si:dkey-125i10.3	10.3105	2.74565	6.70692	0.1491	0.60723	4.5216	6.13733e-06	0.000236908
ENSDARG00000030915	cpa1	2362.39	2.73495	6.65737	0.15021	1.13945	2.40024	0.0163844	0.0895211	ENSG00000091704	CPA1
ENSDARG00000045442	cpb1	7620.4	2.72629	6.6175	0.151114	1.08345	2.51629	0.0118597	0.072671
ENSDARG00000069632	emp1	5.50033	2.68153	6.41536	0.155876	0.536641	4.99688	5.82662e-07	3.46632e-05	ENSG00000134531	EMP1
ENSDARG00000043237	nfil3-2	8.23212	2.65328	6.29098	0.158958	0.710124	3.73637	0.000186697	0.00342368
ENSDARG00000053248	inab	6.8408	2.62861	6.18429	0.1617	0.916825	2.86708	0.00414281	0.0343767	ENSG00000148798	INA
ENSDARG00000090428	ctrb1	12711.4	2.62442	6.16636	0.16217	1.11522	2.35327	0.0186089	0.0975642	ENSG00000168925	CTRB1
ENSDARG00000089919	si:ch211-161h7.8	38.5416	2.61317	6.11847	0.163439	0.772007	3.38491	0.000712027	0.00953786
ENSDARG00000002394	ugt5d1	51.7868	2.58172	5.98655	0.167041	0.993417	2.59883	0.00935413	0.0613309
ENSDARG00000056765	ela2l	5910.12	2.57607	5.96313	0.167697	1.07475	2.3969	0.0165344	0.0900488	ENSG00000162438	CTRC
ENSDARG00000105473	si:cabz01036006.1	2.33836	2.57061	5.94059	0.168333	0.878165	2.92725	0.00341977	0.0300224
ENSDARG00000051875	islr2	17.2496	2.56631	5.92292	0.168836	0.452664	5.66934	1.43345e-08	1.51803e-06	ENSG00000167178	ISLR2
ENSDARG00000104713	zgc:165653	9.42814	2.51713	5.72442	0.17469	1.01786	2.47296	0.0133999	0.0789225
ENSDARG00000016319	c9 complement C9	1163.67	2.47109	5.54464	0.180354	0.567941	4.35097	1.35534e-05	0.000439334	ENSG00000113600	C9
ENSDARG00000079901	si:ch73-15n24.1	64.3503	2.44325	5.43865	0.183869	0.679846	3.59383	0.000325855	0.005198
ENSDARG00000053301	insm1b	6.24758	2.4247	5.36919	0.186248	0.896236	2.70543	0.00682158	0.048814	ENSG00000173404	INSM1
ENSDARG00000078853	arhgef19	20.5343	2.40578	5.29921	0.188707	0.446039	5.39365	6.90422e-08	6.13049e-06	ENSG00000142632	ARHGEF19
ENSDARG00000098406	si:dkey-22a18.2	4.45323	2.38268	5.21506	0.191752	0.84529	2.81878	0.00482069	0.0382235
ENSDARG00000003523	itln3	59.5652	2.37885	5.20123	0.192262	0.908842	2.61745	0.00885885	0.0588466	ENSG00000179914	ITLN1
ENSDARG00000076313	si:ch211-240l19.7	77.2906	2.37726	5.1955	0.192474	0.93909	2.53146	0.011359	0.0704566
ENSDARG00000055278	cfb complement factor B	545.482	2.37117	5.17362	0.193288	0.492267	4.81684	1.45849e-06	7.17964e-05	ENSG00000244255	AL645922.1
ENSDARG00000039095	nkx2.3	10.8424	2.36711	5.15908	0.193833	0.786995	3.00779	0.00263157	0.0249198	ENSG00000119919	NKX2-3
ENSDARG00000079782	vmhcl	5.78983	2.32315	5.00423	0.199831	0.687347	3.37988	0.000725187	0.00967578
ENSDARG00000042993	try	15061.5	2.322	5.00026	0.199989	0.886332	2.61979	0.00879839	0.0586135	ENSG00000010438	PRSS3
ENSDARG00000056594	irx1b	6.22903	2.30461	4.94033	0.202416	0.803189	2.86932	0.00411353	0.0341759
ENSDARG00000097571	si:dkey-114l24.2	61.0157	2.27669	4.84564	0.206371	0.770532	2.9547	0.00312978	0.0283467
ENSDARG00000071389	si:dkey-78l4.6	5.85883	2.27134	4.82771	0.207138	0.822289	2.76221	0.00574107	0.0432655
ENSDARG00000102557	ftr87	5.89944	2.26745	4.81471	0.207697	0.563425	4.0244	5.71207e-05	0.0013466	ENSG00000132481	TRIM47
ENSDARG00000096509	si:dkey-27j5.9	4.25023	2.26592	4.80962	0.207917	0.847034	2.67513	0.00747012	0.0521567	ENSG00000088827	SIGLEC1
ENSDARG00000053298	nkx2.2a	2.67834	2.26425	4.80405	0.208158	0.788341	2.87217	0.00407661	0.0339891	ENSG00000125820	NKX2-2
ENSDARG00000087359	c3a.2	346.786	2.23765	4.71629	0.212031	0.760442	2.94257	0.00325501	0.0290168	ENSG00000125730	C3
ENSDARG00000024492	col9a2	48.1952	2.21349	4.63797	0.215612	0.747441	2.96143	0.00306215	0.027922	ENSG00000049089	COL9A2
ENSDARG00000052207	c3a.3	552.689	2.21187	4.63276	0.215854	0.568529	3.89052	0.00010003	0.00212087	ENSG00000125730	C3
ENSDARG00000015876	npas1	2.276	2.20891	4.62327	0.216297	0.909634	2.42835	0.0151676	0.0850791	ENSG00000130751	NPAS1
ENSDARG00000013721	g6pca.2	1760.5	2.20325	4.60516	0.217148	0.519185	4.24367	2.19889e-05	0.00064273	ENSG00000131482	G6PC
ENSDARG00000087032	si:ch211-200e2.1	18.2818	2.17372	4.51187	0.221638	0.458087	4.74523	2.08274e-06	9.59624e-05
ENSDARG00000041645	a2ml alpha-2-macroglobulin-like	350.403	2.16195	4.47521	0.223453	0.48087	4.49592	6.92695e-06	0.000256614
ENSDARG00000012796	hnmt	22.1794	2.15982	4.46859	0.223784	0.68361	3.15944	0.00158075	0.017135	ENSG00000150540	HNMT
ENSDARG00000040503	sb:cb81	19.4053	2.14909	4.43547	0.225455	0.414197	5.18856	2.11922e-07	1.5364e-05
ENSDARG00000101135	si:dkey-85k7.7	27.1078	2.147	4.42904	0.225782	0.469408	4.57383	4.7888e-06	0.000192954
ENSDARG00000076702	CABZ01068356.1	3.37205	2.12925	4.37491	0.228576	0.754129	2.82346	0.00475087	0.0378777	ENSG00000059915	PSD
ENSDARG00000090850	serpina1l	2033.31	2.12403	4.35911	0.229405	0.56795	3.73982	0.000184152	0.00339184	ENSG00000188488	SERPINA5
ENSDARG00000003281	pik3ip1	114.303	2.11234	4.32393	0.231271	0.591861	3.56899	0.000358361	0.00559736	ENSG00000100100	PIK3IP1
ENSDARG00000023157	cbln10	59.2807	2.10064	4.28901	0.233154	0.669085	3.13958	0.00169191	0.0180117
ENSDARG00000103677	CABZ01008730.1	3.1659	2.07287	4.20723	0.237686	0.795446	2.60592	0.00916267	0.0604792	ENSG00000060491	OGFR
ENSDARG00000099200	zgc:123103	1611.6	2.056	4.15831	0.240482	0.511919	4.01625	5.91309e-05	0.00138431
ENSDARG00000036239	gatm	1726.4	2.04658	4.13125	0.242058	0.469048	4.36326	1.28139e-05	0.000417369	ENSG00000171766	GATM
ENSDARG00000077239	si:ch211-165i18.2	22.2353	2.02811	4.07869	0.245176	0.558577	3.63085	0.000282495	0.00466832
ENSDARG00000098104	CABZ01080371.1	5.65717	2.02566	4.07179	0.245592	0.438542	4.61909	3.85431e-06	0.000160354
ENSDARG00000036186	mbpa	546.062	2.00431	4.01198	0.249253	0.694309	2.88678	0.00389211	0.0329713
ENSDARG00000012609	hpx	1321.42	1.99125	3.97582	0.25152	0.651143	3.05809	0.00222754	0.0219573	ENSG00000110169	HPX
ENSDARG00000101767	si:dkey-183i3.6	3.14237	1.98861	3.96853	0.251982	0.695605	2.85882	0.00425225	0.0350087
ENSDARG00000092987	zmat4a	3.31993	1.96176	3.89537	0.256715	0.756848	2.59201	0.00954163	0.0623179	ENSG00000165061	ZMAT4
ENSDARG00000076043	si:dkeyp-73d8.9	251.982	1.95427	3.8752	0.258051	0.517502	3.77635	0.000159141	0.00304536
ENSDARG00000102456	cfhl4	728.538	1.95269	3.87095	0.258334	0.530856	3.67837	0.000234725	0.00410027	ENSG00000134365	CFHR4
ENSDARG00000095070	si:ch211-67e16.2	1.81932	1.94894	3.86092	0.259006	0.697697	2.7934	0.00521578	0.0404833	ENSG00000163599	CTLA4
ENSDARG00000039264	igfbp5a	8.05908	1.9398	3.83653	0.260652	0.771984	2.51275	0.0119794	0.0730499	ENSG00000115461	IGFBP5
ENSDARG00000100946	si:ch211-212k18.9	13.0821	1.92861	3.80688	0.262682	0.480188	4.01636	5.91028e-05	0.00138431
ENSDARG00000092067	atn1	37.5913	1.92849	3.80656	0.262704	0.330217	5.84006	5.21829e-09	6.10118e-07	ENSG00000111676	ATN1
ENSDARG00000056130	neurog1	4.22703	1.92115	3.78725	0.264044	0.733243	2.62007	0.00879108	0.0585888	ENSG00000181965	NEUROG1
ENSDARG00000053973	fetub	19029.6	1.90765	3.75197	0.266527	0.597706	3.19162	0.0014148	0.0158193	ENSG00000090512	FETUB
ENSDARG00000017615	tlx3b	1.8268	1.90391	3.74226	0.267218	0.774341	2.45875	0.0139422	0.0808741	ENSG00000115297	TLX2
ENSDARG00000099533	zgc:113279	7.01107	1.90135	3.73562	0.267693	0.696866	2.72843	0.00636374	0.0465606
ENSDARG00000020994	wu:fb63a08	205.396	1.89588	3.72149	0.268709	0.7574	2.50314	0.0123095	0.074517
ENSDARG00000012694	c3a.1	4849.42	1.88919	3.70428	0.269958	0.527901	3.57868	0.000345328	0.005457	ENSG00000125730	C3
ENSDARG00000054456	clip3	17.582	1.88499	3.6935	0.270746	0.296904	6.34881	2.16986e-10	4.52472e-08	ENSG00000105270	CLIP3
ENSDARG00000097026	si:dkey-16m19.1	6.99484	1.87722	3.67367	0.272207	0.749598	2.50431	0.0122692	0.0743467
ENSDARG00000078757	si:ch211-212c13.8	65.9178	1.87534	3.66889	0.272562	0.708456	2.64709	0.00811882	0.0553983
ENSDARG00000105265	zgc:171534	292.329	1.86809	3.65048	0.273936	0.567107	3.29407	0.000987489	0.0122389	ENSG00000149218	ENDOD1
ENSDARG00000058329	si:ch211-247l8.10	20.7891	1.86333	3.63846	0.274841	0.653727	2.85032	0.00436758	0.0356532	ENSG00000223638	RFPL4A
ENSDARG00000079182	NPAS3	5.565	1.84662	3.59658	0.278042	0.610085	3.02683	0.00247133	0.0238604	ENSG00000151322	NPAS3
ENSDARG00000031658	si:ch211-207d6.2	34.4924	1.84109	3.5828	0.279111	0.366197	5.0276	4.96669e-07	3.03139e-05	ENSG00000120549	KIAA1217
ENSDARG00000087873	eevs	59.1064	1.83169	3.55954	0.280936	0.586264	3.12434	0.00178205	0.0187055
ENSDARG00000090996	parm1	73.7039	1.82772	3.54975	0.28171	0.767458	2.38152	0.0172414	0.0926273	ENSG00000169116	PARM1
ENSDARG00000061830	prss12	30.7019	1.82448	3.5418	0.282342	0.388997	4.69023	2.72904e-06	0.000119481	ENSG00000164099	PRSS12
ENSDARG00000019492	shbg	294.914	1.81472	3.51792	0.284259	0.555598	3.26626	0.00108979	0.0131759	ENSG00000129214	SHBG
ENSDARG00000075015	soul5	71.0537	1.79663	3.47409	0.287845	0.397423	4.52071	6.16335e-06	0.000237459
ENSDARG00000095751	leg1.2	397.246	1.79648	3.47373	0.287875	0.732833	2.45142	0.0142293	0.0817048	ENSG00000184530	C6orf58
ENSDARG00000071879	tgfb2l	53.5319	1.79641	3.47356	0.287889	0.368411	4.87611	1.08201e-06	5.65524e-05
ENSDARG00000070624	cacng7b	3.92064	1.79268	3.46459	0.288635	0.678838	2.64081	0.00827077	0.0561386	ENSG00000105605	CACNG7
ENSDARG00000100739	CABZ01052573.1	9.05638	1.7917	3.46223	0.288831	0.634848	2.82225	0.00476875	0.0379558	ENSG00000162006	MSLNL
ENSDARG00000098465	si:ch73-366l1.5	68.8997	1.79016	3.45853	0.289141	0.402592	4.44658	8.72495e-06	0.000306921
ENSDARG00000035185	fzd9a	2.68669	1.78547	3.44732	0.290081	0.714942	2.49737	0.012512	0.0752349	ENSG00000188763	FZD9
ENSDARG00000040568	pdzd3a	84.4136	1.78354	3.4427	0.29047	0.733216	2.43249	0.0149955	0.0845194	ENSG00000172367	PDZD3
ENSDARG00000095065	si:ch211-113e8.9	3.26486	1.78244	3.44007	0.290692	0.71592	2.48972	0.0127845	0.0762357	ENSG00000213203	GIMAP1
ENSDARG00000076838	apom	555.438	1.77077	3.41237	0.293052	0.445091	3.97845	6.93648e-05	0.00157645	ENSG00000204444	APOM
ENSDARG00000074639	CABZ01090749.1	14.0895	1.76754	3.40474	0.293708	0.482679	3.66194	0.000250309	0.00429796	ENSG00000204291	COL15A1
ENSDARG00000018263	pdia2	347.055	1.76703	3.40352	0.293813	0.550731	3.20852	0.00133422	0.0152213	ENSG00000185615	PDIA2
ENSDARG00000104981	SLC45A4 (1 of many)	9.44974	1.76327	3.39466	0.29458	0.46004	3.83286	0.000126663	0.00254674	ENSG00000022567	SLC45A4
ENSDARG00000067992	si:dkey-31e10.5	6.73782	1.76252	3.39291	0.294732	0.633133	2.78382	0.00537235	0.0413983	ENSG00000091972	CD200
ENSDARG00000035873	fjx1	30.3387	1.76228	3.39234	0.294781	0.64732	2.72243	0.0064804	0.0471847	ENSG00000179431	FJX1
ENSDARG00000063059	abcg8	106.734	1.7616	3.39075	0.29492	0.713374	2.4694	0.0135341	0.0793578	ENSG00000143921	ABCG8
ENSDARG00000075301	gsdf	570.348	1.76091	3.38911	0.295063	0.585611	3.00695	0.0026388	0.0249766
ENSDARG00000100207	CR792418.2	2.43767	1.75801	3.38232	0.295655	0.664334	2.64628	0.00813825	0.0554624
ENSDARG00000053481	entpd5a	166.047	1.7526	3.36965	0.296767	0.665331	2.63418	0.00843414	0.0570369	ENSG00000187097	ENTPD5
ENSDARG00000053509	kazald3	24.0662	1.74903	3.36132	0.297502	0.547735	3.1932	0.00140705	0.0157502	ENSG00000107821	KAZALD1
ENSDARG00000087180	ubxn2a	8.42159	1.74538	3.35282	0.298256	0.618509	2.82191	0.00477385	0.0379558	ENSG00000173960	UBXN2A
ENSDARG00000076623	col14a1b	106.576	1.74015	3.3407	0.299338	0.351739	4.94728	7.52564e-07	4.30003e-05	ENSG00000187955	COL14A1
ENSDARG00000099959	smyhc1	577.073	1.73729	3.33408	0.299933	0.653319	2.65917	0.00783332	0.0539845
ENSDARG00000089821	si:dkey-9k7.3	18.6242	1.73039	3.31818	0.30137	0.494339	3.50042	0.000464531	0.00678907
ENSDARG00000079589	si:dkeyp-73d8.6	240.326	1.72266	3.30043	0.30299	0.538377	3.19972	0.00137561	0.0155184
ENSDARG00000075539	snphb	3.38345	1.71716	3.28789	0.304146	0.653857	2.62621	0.00863423	0.0578581	ENSG00000101298	SNPH
ENSDARG00000077960	si:ch211-186e20.7	67.0666	1.71326	3.27902	0.30497	0.669357	2.55956	0.0104803	0.0665576	ENSG00000188488	SERPINA5
ENSDARG00000079622	frmd5	6.42741	1.71169	3.27543	0.305303	0.689323	2.48314	0.013023	0.0772934	ENSG00000171877	FRMD5
ENSDARG00000061647	nrxn1a	28.1599	1.70499	3.26026	0.306724	0.335093	5.0881	3.61675e-07	2.31848e-05	ENSG00000179915	NRXN1
ENSDARG00000090108	si:ch1073-174d20.1	9.08342	1.70495	3.26018	0.306731	0.568412	2.9995	0.00270421	0.0253217	ENSG00000003249	DBNDD1
ENSDARG00000100442	cfh complement factor H	385.96	1.70138	3.25212	0.307492	0.438141	3.88317	0.000103102	0.00216332
ENSDARG00000028552	plppr3b	3.93133	1.70072	3.25063	0.307632	0.49833	3.41284	0.000642892	0.00878613	ENSG00000129951	PLPPR3
ENSDARG00000103295	cyp3a65	2913.07	1.70003	3.24907	0.30778	0.386449	4.39909	1.08703e-05	0.000363428	ENSG00000106258	CYP3A5
ENSDARG00000086616	cabz01093075.1	6.91569	1.69579	3.23954	0.308686	0.650792	2.60573	0.00916781	0.0604792	ENSG00000160791	CCR5
ENSDARG00000099428	si:dkey-15h8.17	28.9251	1.69288	3.23301	0.309309	0.597137	2.835	0.00458262	0.0368559
ENSDARG00000041595	ces3	657.538	1.68699	3.21984	0.310575	0.465983	3.62028	0.000294282	0.00483381	ENSG00000172828	CES3
ENSDARG00000100089	camk2b2	3.08299	1.68671	3.21923	0.310633	0.688339	2.45041	0.0142692	0.0818556	ENSG00000058404	CAMK2B
ENSDARG00000037145	slc8a4b	42.1916	1.68056	3.20551	0.311962	0.638657	2.63139	0.0085036	0.0572959
ENSDARG00000078707	sema7a	27.8829	1.6767	3.19697	0.312796	0.393049	4.26589	1.99108e-05	0.000594882	ENSG00000138623	SEMA7A
ENSDARG00000099744	gap43	12.9372	1.67237	3.18738	0.313737	0.631011	2.6503	0.00804196	0.05501	ENSG00000172020	GAP43
ENSDARG00000089192	zmp:0000001267	3.71193	1.66906	3.18008	0.314457	0.625974	2.66635	0.00766809	0.0532131
ENSDARG00000101526	si:dkey-82o10.4	6.29332	1.66503	3.1712	0.315339	0.579649	2.87248	0.0040727	0.033989
ENSDARG00000051912		130.483	1.6604	3.16105	0.316351	0.616095	2.69504	0.00703794	0.0500022	ENSG00000110169	HPX
ENSDARG00000061481	wu:fj05g07	20.317	1.65347	3.1459	0.317874	0.644129	2.56699	0.0102585	0.0656032
ENSDARG00000088805	CR848841.1	13.2039	1.65188	3.14243	0.318226	0.555192	2.97533	0.00292677	0.0269457	ENSG00000132688	NES
ENSDARG00000061421		2.85055	1.63769	3.11168	0.32137	0.659467	2.48336	0.013015	0.0772684	ENSG00000174672	BRSK2
ENSDARG00000002002	lmcd1	26.8096	1.63746	3.11118	0.321422	0.521228	3.14155	0.00168057	0.0179288	ENSG00000071282	LMCD1
ENSDARG00000102907	CABZ01072043.1	902.625	1.63226	3.09999	0.322582	0.379647	4.29942	1.71246e-05	0.000532242
ENSDARG00000057498	habp2	200.797	1.61762	3.06869	0.325872	0.49199	3.28792	0.0010093	0.012418	ENSG00000148702	HABP2
ENSDARG00000013295	slc2a3a	6.91247	1.61669	3.0667	0.326084	0.511048	3.16347	0.00155901	0.0169812	ENSG00000173262	SLC2A14
ENSDARG00000000551	slc1a4	94.9106	1.61258	3.05798	0.327013	0.431351	3.73844	0.000185166	0.00340487	ENSG00000115902	SLC1A4
ENSDARG00000034173	prkcq	16.4094	1.61086	3.05434	0.327403	0.63867	2.52221	0.0116619	0.0716977	ENSG00000065675	PRKCQ
ENSDARG00000015627	rgs6	6.75301	1.60905	3.05051	0.327814	0.588192	2.73559	0.00622694	0.0458843	ENSG00000182732	RGS6
ENSDARG00000094929	apoa4b.3	951.608	1.60861	3.04959	0.327913	0.556825	2.88891	0.00386585	0.0328687	ENSG00000110244	APOA4
ENSDARG00000030106	stmn4	29.1896	1.60633	3.04476	0.328433	0.412318	3.89585	9.78568e-05	0.00208352	ENSG00000015592	STMN4
ENSDARG00000045230	cox6b1	254.94	1.59969	3.03079	0.329947	0.298507	5.35897	8.36972e-08	7.2348e-06	ENSG00000126267	COX6B1
ENSDARG00000061383	serpinf2b	348.877	1.59599	3.02301	0.330796	0.469039	3.40267	0.000667307	0.00905273	ENSG00000167711	SERPINF2
ENSDARG00000073718	si:ch73-233k15.2	5.10008	1.59525	3.02147	0.330964	0.540144	2.95338	0.00314312	0.0284074	ENSG00000100342	APOL1
ENSDARG00000077414	zgc:194312	5.89049	1.59508	3.02111	0.331004	0.674291	2.36556	0.0180026	0.0952743
ENSDARG00000100312	hoxa13a	8.70723	1.59465	3.0202	0.331104	0.666185	2.3937	0.0166795	0.0904737	ENSG00000106031	HOXA13
ENSDARG00000042785	pitx1	10.2207	1.59025	3.011	0.332115	0.504244	3.15372	0.00161204	0.0173995	ENSG00000069011	PITX1
ENSDARG00000021480	olfml2bb	83.1441	1.58941	3.00927	0.332307	0.446515	3.5596	0.000371427	0.00574782	ENSG00000162745	OLFML2B
ENSDARG00000035339	ftr99	4.32808	1.58553	3.00119	0.333201	0.656416	2.41544	0.0157162	0.0870936	ENSG00000132481	TRIM47
ENSDARG00000014101	pyroxd2	51.0997	1.58343	2.99682	0.333687	0.288499	5.48853	4.05302e-08	3.81305e-06	ENSG00000119943	PYROXD2
ENSDARG00000107280	CABZ01031892.1	21.6426	1.58324	2.99642	0.333731	0.3942	4.01634	5.9109e-05	0.00138431
ENSDARG00000070894	abhd6b	6.84326	1.58227	2.9944	0.333956	0.527557	2.99924	0.00270656	0.0253217	ENSG00000163686	ABHD6
ENSDARG00000078829	ccdc149a	7.03019	1.57977	2.98923	0.334535	0.545693	2.89499	0.00379177	0.0323612	ENSG00000181982	CCDC149
ENSDARG00000012409	rnf207b	10.8798	1.57511	2.97958	0.335618	0.550045	2.8636	0.00418859	0.0346655	ENSG00000158286	RNF207
ENSDARG00000090722	leg1.1	2443.83	1.5697	2.96843	0.336879	0.563439	2.78592	0.00533755	0.0412035	ENSG00000184530	C6orf58
ENSDARG00000025089	loxl4	103.121	1.56557	2.95995	0.337844	0.483623	3.23717	0.00120721	0.0141637	ENSG00000138131	LOXL4
ENSDARG00000038672	tcf7	30.4136	1.56009	2.94873	0.339129	0.601401	2.5941	0.009484	0.0620216	ENSG00000081059	TCF7
ENSDARG00000104839	mansc1	615.234	1.55786	2.94416	0.339656	0.364941	4.26879	1.96535e-05	0.000588936	ENSG00000111261	MANSC1
ENSDARG00000086838	itga2.3	18.6138	1.55676	2.94192	0.339914	0.503161	3.09396	0.00197504	0.0202744	ENSG00000164171	ITGA2
ENSDARG00000100406		1751.03	1.5532	2.93467	0.340754	0.471195	3.2963	0.000979687	0.0121646	ENSG00000055955	ITIH4
ENSDARG00000079393	tmprss15	67.3288	1.55258	2.93342	0.340899	0.570026	2.72371	0.00645539	0.0470364	ENSG00000154646	TMPRSS15
ENSDARG00000101456	acp5b	35.9739	1.55173	2.93168	0.341102	0.592127	2.6206	0.0087776	0.0585376
ENSDARG00000029372	rasa4	7.05626	1.54849	2.9251	0.341868	0.50484	3.06729	0.00216011	0.0214917	ENSG00000170667	RASA4B
ENSDARG00000103591	dkk3a	5.66252	1.54482	2.91767	0.34274	0.593247	2.604	0.00921424	0.0606694	ENSG00000050165	DKK3
ENSDARG00000069630	tat	286.916	1.54271	2.91342	0.343239	0.459803	3.35516	0.000793183	0.010418	ENSG00000198650	TAT
ENSDARG00000093079	proca	57.5581	1.5388	2.90553	0.344172	0.64949	2.36924	0.0178245	0.0945051	ENSG00000115718	PROC
ENSDARG00000101258	col27a1a	38.2201	1.53707	2.90205	0.344584	0.394806	3.89324	9.89137e-05	0.00210382	ENSG00000196739	COL27A1
ENSDARG00000007366	AMDHD1	64.0083	1.5351	2.89809	0.345055	0.550008	2.79106	0.00525363	0.0407458	ENSG00000139344	AMDHD1
ENSDARG00000034307	chrne	86.4798	1.5331	2.89408	0.345533	0.502078	3.05352	0.00226176	0.022208	ENSG00000108556	CHRNE
ENSDARG00000071250	tmem79a	33.0222	1.53216	2.89219	0.345758	0.410823	3.7295	0.000191859	0.00348069	ENSG00000163472	TMEM79
ENSDARG00000105391	si:cabz01059983.1	5.11033	1.53187	2.8916	0.34583	0.58129	2.63529	0.00840658	0.0569196
ENSDARG00000094428	si:dkey-31f5.8	6.57754	1.53023	2.88832	0.346222	0.547503	2.79492	0.00519124	0.0403393
ENSDARG00000004782	fgfr3	40.0083	1.52994	2.88774	0.346291	0.38534	3.97037	7.17599e-05	0.00161816	ENSG00000068078	FGFR3
ENSDARG00000099877	si:dkeyp-72e1.6	27.3381	1.52781	2.88348	0.346803	0.610766	2.50147	0.0123679	0.074663	ENSG00000263429	TMEM238L
ENSDARG00000010266	igf2bp3	215.058	1.52724	2.88233	0.346941	0.436443	3.49928	0.000466517	0.00680825	ENSG00000136231	IGF2BP3
ENSDARG00000074865	frmpd3	6.91552	1.52719	2.88224	0.346953	0.466979	3.27036	0.00107411	0.0130096	ENSG00000147234	FRMPD3
ENSDARG00000073814	pax1b	3.42618	1.52068	2.86926	0.348522	0.644468	2.35959	0.0182954	0.0963699	ENSG00000125813	PAX1
ENSDARG00000097938	asb5a	12.9942	1.52016	2.86824	0.348646	0.468643	3.24375	0.00117965	0.0139374
ENSDARG00000101926	zgc:101130	12.9879	1.52006	2.86803	0.348671	0.428699	3.54575	0.000391499	0.00596748
ENSDARG00000092774	tarsl2	81.0583	1.51943	2.86678	0.348824	0.286667	5.30032	1.15597e-07	9.3594e-06	ENSG00000185418	TARSL2
ENSDARG00000075928	hivep3a	3.79689	1.51881	2.86555	0.348973	0.606966	2.5023	0.0123388	0.0745897	ENSG00000127124	HIVEP3
ENSDARG00000019753	kcnn3	7.77856	1.51854	2.86501	0.349039	0.494695	3.06965	0.00214313	0.0213963	ENSG00000143603	KCNN3
ENSDARG00000011239	ppp1r14aa	41.9066	1.51828	2.8645	0.349101	0.404716	3.75148	0.000175794	0.00329849	ENSG00000167641	PPP1R14A
ENSDARG00000041062	calb2a	4.93492	1.50789	2.84393	0.351626	0.635957	2.37105	0.0177375	0.0942167	ENSG00000172137	CALB2
ENSDARG00000089362	grn1	183.885	1.50541	2.83906	0.352229	0.566213	2.65874	0.00784335	0.0540352
ENSDARG00000074558	cntnap2b	7.02093	1.49559	2.81979	0.354637	0.405827	3.68528	0.000228452	0.00402115
ENSDARG00000076569	ndp	2.73074	1.49555	2.81972	0.354645	0.605199	2.47118	0.0134669	0.0791157	ENSG00000124479	NDP
ENSDARG00000026882	palm1a	17.4969	1.49522	2.81907	0.354727	0.375574	3.98115	6.85828e-05	0.00156572	ENSG00000099864	PALM
ENSDARG00000078333	tmem234	12.0108	1.49372	2.81613	0.355097	0.494916	3.01812	0.0025435	0.0243135	ENSG00000160055	TMEM234
ENSDARG00000089310	gc	267.924	1.48674	2.80255	0.356818	0.514446	2.88998	0.00385263	0.03277	ENSG00000145321	GC
ENSDARG00000076933	aldh1a3	4.78444	1.48038	2.79023	0.358394	0.559465	2.64607	0.00814333	0.0554764	ENSG00000184254	ALDH1A3
ENSDARG00000010957	mpp2b	4.9388	1.47544	2.78068	0.359624	0.397476	3.71202	0.000205615	0.00367726	ENSG00000108852	MPP2
ENSDARG00000099672	capgb	78.9303	1.47519	2.78021	0.359685	0.294454	5.00993	5.4449e-07	3.26807e-05	ENSG00000042493	CAPG
ENSDARG00000077162	nwd2	4.33949	1.47219	2.77443	0.360434	0.501767	2.93402	0.00334601	0.0295545	ENSG00000174145	NWD2
ENSDARG00000039381	ch25hl1.1	8.17682	1.46989	2.77	0.361011	0.577412	2.54564	0.0109076	0.0685182
ENSDARG00000077481	si:dkey-76k16.6	21.0198	1.46542	2.76143	0.362131	0.504589	2.90418	0.00368219	0.031707	ENSG00000149124	GLYAT
ENSDARG00000058985	KCNJ6	7.36103	1.46417	2.75904	0.362444	0.438048	3.34249	0.000830316	0.0107247	ENSG00000157542	KCNJ6
ENSDARG00000042613	crp3	153.186	1.46296	2.75674	0.362747	0.595657	2.45605	0.0140474	0.0811456
ENSDARG00000055459	dlgap3	4.28051	1.4626	2.75604	0.362839	0.621224	2.35438	0.0185535	0.0973746	ENSG00000116544	DLGAP3
ENSDARG00000017780	rorcb	40.3716	1.46206	2.75502	0.362974	0.415254	3.52089	0.000430107	0.0064016
ENSDARG00000073711	mmrn2b	6.06367	1.46179	2.75451	0.363041	0.547093	2.67193	0.00754171	0.0525296	ENSG00000173269	MMRN2
ENSDARG00000045262	gsnb	82.4251	1.46131	2.75359	0.363162	0.285851	5.11216	3.185e-07	2.09847e-05	ENSG00000148180	GSN
ENSDARG00000075016	apobb.2	1047.65	1.45615	2.74376	0.364463	0.530297	2.74592	0.00603407	0.0448059	ENSG00000084674	APOB
ENSDARG00000044672	parapinopsinb	3.03098	1.45436	2.74035	0.364916	0.583054	2.49439	0.0126175	0.0755968
ENSDARG00000103292	BX936303.4	5.28947	1.4518	2.7355	0.365564	0.587928	2.46936	0.0135356	0.0793578
ENSDARG00000062289	edaradd	6.65762	1.44979	2.73169	0.366074	0.557075	2.60251	0.0092543	0.0609134	ENSG00000186197	EDARADD
ENSDARG00000105281	p2ry1	36.7256	1.44383	2.72042	0.367591	0.374638	3.85393	0.000116239	0.00237251	ENSG00000169860	P2RY1
ENSDARG00000037879	lfng	37.3596	1.44279	2.71845	0.367856	0.318677	4.52742	5.97076e-06	0.000232699	ENSG00000106003	LFNG
ENSDARG00000088689	si:ch211-201o1.1	50.945	1.439	2.71133	0.368823	0.308202	4.66901	3.02656e-06	0.000130932
ENSDARG00000063527	elmo2	10.8712	1.43896	2.71126	0.368833	0.409295	3.51571	0.000438587	0.00649436	ENSG00000062598	ELMO2
ENSDARG00000088733	zmp:0000000938	4.81622	1.43545	2.70467	0.369731	0.512347	2.80172	0.00508312	0.0397896	ENSG00000186376	ZNF75D
ENSDARG00000013522	pck1	3239.67	1.43415	2.70224	0.370064	0.530194	2.70496	0.00683126	0.048814	ENSG00000124253	PCK1
ENSDARG00000031761	dab2	768.873	1.43316	2.70037	0.370319	0.273952	5.23142	1.68214e-07	1.28882e-05
ENSDARG00000067520	SLC27A2 (1 of many)	27.2113	1.43276	2.69963	0.370421	0.446445	3.20927	0.00133073	0.01519	ENSG00000140284	SLC27A2
ENSDARG00000074818	si:cabz01036022.1	5.05628	1.43217	2.69853	0.370573	0.594938	2.40726	0.0160727	0.0884391
ENSDARG00000021351	nefma	76.5501	1.42958	2.69368	0.37124	0.578827	2.46978	0.0135195	0.0793327	ENSG00000104722	NEFM
ENSDARG00000079613	sall3a	5.42668	1.42462	2.68445	0.372516	0.400323	3.55869	0.000372714	0.00575927	ENSG00000256463	SALL3
ENSDARG00000077326	slc45a4	117.318	1.42054	2.67686	0.373572	0.250023	5.68164	1.33412e-08	1.42028e-06	ENSG00000022567	SLC45A4
ENSDARG00000055136	si:dkey-101k6.5	14.8677	1.41818	2.67249	0.374183	0.535473	2.64847	0.00808564	0.055214
ENSDARG00000079324	ano9b	48.2049	1.41291	2.66273	0.375555	0.393137	3.59392	0.000325734	0.005198	ENSG00000185101	ANO9
ENSDARG00000095378	gdf10a	15.2198	1.40964	2.65671	0.376406	0.57792	2.43916	0.0147213	0.0834153
ENSDARG00000007988	masp2	111.601	1.40482	2.64785	0.377665	0.48157	2.91717	0.00353222	0.0306768	ENSG00000009724	MASP2
ENSDARG00000105052	cfhl5	77.4721	1.40436	2.647	0.377787	0.476574	2.94677	0.00321107	0.0287645	ENSG00000134365	CFHR4
ENSDARG00000056617	rpgra	8.25849	1.40033	2.63962	0.378842	0.511675	2.73676	0.00620477	0.0457543	ENSG00000156313	RPGR
ENSDARG00000098661	AL935300.3	5.349	1.39369	2.62749	0.380591	0.517736	2.69189	0.00710491	0.0502838
ENSDARG00000103837		33.6747	1.39362	2.62738	0.380607	0.583399	2.3888	0.0169034	0.0913454	ENSG00000197616	MYH6
ENSDARG00000017466	ncam2	10.854	1.39331	2.62681	0.380689	0.406814	3.42494	0.000614926	0.0084901	ENSG00000154654	NCAM2
ENSDARG00000098810		4.41935	1.39242	2.62519	0.380925	0.57554	2.41933	0.0155491	0.0863912	ENSG00000187135	VSTM2B
ENSDARG00000008203	pax1a	4.23244	1.39233	2.62502	0.38095	0.463709	3.00259	0.00267696	0.0251682	ENSG00000125813	PAX1
ENSDARG00000010042	dnm1a	8.78191	1.3886	2.61824	0.381935	0.457264	3.03676	0.00239137	0.0232214	ENSG00000106976	DNM1
ENSDARG00000102505	trim32	32.88	1.38844	2.61795	0.381979	0.2641	5.25724	1.46237e-07	1.14649e-05	ENSG00000119401	TRIM32
ENSDARG00000009014	col11a1b	957.179	1.38774	2.61668	0.382164	0.269068	5.15756	2.50188e-07	1.73402e-05
ENSDARG00000010144	plppr3a	3.91789	1.38234	2.60691	0.383595	0.500908	2.75967	0.00578592	0.0434901	ENSG00000129951	PLPPR3
ENSDARG00000035398	enc1	83.8539	1.37388	2.59166	0.385852	0.272977	5.03295	4.82987e-07	2.96501e-05	ENSG00000171617	ENC1
ENSDARG00000074794	necab3	4.12147	1.37366	2.59128	0.38591	0.506974	2.70953	0.00673784	0.0483852	ENSG00000125967	NECAB3
ENSDARG00000041073	si:dkey-12e7.4	8.58193	1.37187	2.58806	0.386389	0.30852	4.44662	8.72301e-06	0.000306921
ENSDARG00000070025	dchs1a	83.2785	1.37181	2.58794	0.386407	0.231131	5.93518	2.93519e-09	3.78903e-07	ENSG00000166341	DCHS1
ENSDARG00000007149	nadl1.2	26.5648	1.36581	2.5772	0.388017	0.351328	3.88755	0.00010126	0.00213799	ENSG00000198910	L1CAM
ENSDARG00000071460	si:ch211-234p6.5	36.4897	1.36319	2.57254	0.388721	0.4093	3.33055	0.000866746	0.0110759	ENSG00000105559	PLEKHA4
ENSDARG00000000503	stx1b	39.9	1.3611	2.56881	0.389285	0.404916	3.36144	0.000775369	0.0102439	ENSG00000099365	STX1B
ENSDARG00000015709	hsd17b12a	142.454	1.3592	2.56543	0.389798	0.469634	2.89417	0.00380164	0.0324181	ENSG00000149084	HSD17B12
ENSDARG00000061773	neurl1ab	9.73331	1.35865	2.56445	0.389948	0.401412	3.38467	0.000712642	0.00953978
ENSDARG00000062132	cyp4v8	202.71	1.35547	2.55881	0.390806	0.543459	2.49416	0.0126256	0.0756002	ENSG00000145476	CYP4V2
ENSDARG00000099757	wdr47b	54.6897	1.35412	2.55641	0.391174	0.420431	3.22079	0.0012784	0.0147256	ENSG00000085433	WDR47
ENSDARG00000077245	si:dkey-225n22.4	41.2905	1.35314	2.55468	0.391439	0.510064	2.65288	0.00798073	0.0546837
ENSDARG00000096749	NDUFAF8	8.03606	1.35268	2.55386	0.391565	0.469314	2.88224	0.00394853	0.0332502	ENSG00000224877	NDUFAF8
ENSDARG00000004869	penka	26.5104	1.35138	2.55157	0.391916	0.538438	2.50982	0.0120792	0.0734817	ENSG00000181195	PENK
ENSDARG00000076414	espn	12.8905	1.35086	2.55064	0.392059	0.52755	2.56062	0.0104485	0.0664935	ENSG00000187017	ESPN
ENSDARG00000077217	zgc:162184	20.3361	1.35033	2.5497	0.392203	0.391311	3.45078	0.000558969	0.00787344	ENSG00000214711	CAPN14
ENSDARG00000079834	kdf1a	76.9819	1.34873	2.54688	0.392637	0.511881	2.63486	0.00841724	0.0569607	ENSG00000175707	KDF1
ENSDARG00000039502	eef1a1a	31.0164	1.34873	2.54688	0.392637	0.2359	5.7174	1.08169e-08	1.1891e-06	ENSG00000156508	EEF1A1
ENSDARG00000079198	usp13	194.398	1.34868	2.5468	0.39265	0.215773	6.25049	4.09179e-10	7.73501e-08	ENSG00000058056	USP13
ENSDARG00000086569	zgc:172051	207.841	1.34847	2.54643	0.392707	0.564926	2.38699	0.0169868	0.0916982
ENSDARG00000011163	sema3fa	24.3426	1.34423	2.53895	0.393863	0.36197	3.71367	0.000204278	0.00365981	ENSG00000001617	SEMA3F
ENSDARG00000069540	si:dkey-30c15.2	22.9224	1.34268	2.53622	0.394287	0.569859	2.35617	0.0184647	0.0970596
ENSDARG00000077341	ppp1r14c	19.3165	1.34159	2.53431	0.394585	0.473119	2.83563	0.00457352	0.0368413	ENSG00000198729	PPP1R14C
ENSDARG00000104172	diabloa	188.286	1.34158	2.53429	0.394587	0.399272	3.36007	0.000779216	0.0102746	ENSG00000184047	DIABLO
ENSDARG00000086288	scg3	39.8385	1.33592	2.52437	0.396139	0.27977	4.77506	1.7965e-06	8.45065e-05	ENSG00000104112	SCG3
ENSDARG00000061682	bicc1a	54.6444	1.32997	2.51398	0.397775	0.227309	5.85094	4.88806e-09	5.78192e-07	ENSG00000122870	BICC1
ENSDARG00000092155	apoc2	1880.81	1.32875	2.51185	0.398114	0.364207	3.64833	0.000263947	0.00446767
ENSDARG00000055498	si:ch1073-184j22.1	22.86	1.32815	2.51081	0.398278	0.534116	2.48663	0.0128959	0.0767643	ENSG00000178752	ERFE
ENSDARG00000078088	si:ch211-186j3.6	8.72789	1.32798	2.51052	0.398324	0.343063	3.87097	0.000108404	0.0022489
ENSDARG00000086851	si:dkey-264d12.5	7.69959	1.32626	2.50751	0.398801	0.48446	2.7376	0.00618889	0.0456538
ENSDARG00000089643	mcama	20.0134	1.32602	2.50711	0.398866	0.327826	4.04489	5.23468e-05	0.00127109	ENSG00000076706	MCAM
ENSDARG00000075133	adgrb1a	10.5208	1.32507	2.50545	0.399129	0.352646	3.75751	0.00017161	0.00324105	ENSG00000181790	ADGRB1
ENSDARG00000031372	efna2a	9.00727	1.32494	2.50523	0.399165	0.402041	3.29554	0.000982333	0.0121825	ENSG00000099617	EFNA2
ENSDARG00000004697	rxrgb	29.3219	1.32443	2.50434	0.399307	0.413158	3.20563	0.00134769	0.0153394	ENSG00000143171	RXRG
ENSDARG00000100598		15.5001	1.32118	2.4987	0.400208	0.356493	3.70605	0.000210521	0.00375835	ENSG00000071991	CDH19
ENSDARG00000090689	hbbe1.2	4.53211	1.31664	2.49085	0.401469	0.538999	2.44275	0.0145758	0.082982	ENSG00000196565	HBG2
ENSDARG00000055412	mylk4b	32.4149	1.31659	2.49077	0.401483	0.415628	3.16771	0.00153645	0.0167897	ENSG00000145949	MYLK4
ENSDARG00000091618	cltcl1	30.9064	1.31458	2.4873	0.402042	0.336788	3.9033	9.48905e-05	0.00203106	ENSG00000141367	CLTC
ENSDARG00000105060	rdh8b	6.66324	1.31436	2.48691	0.402105	0.405831	3.23868	0.00120085	0.0141023	ENSG00000080511	RDH8
ENSDARG00000099902	il17rc	27.7746	1.31382	2.486	0.402253	0.425409	3.08838	0.00201249	0.0205278	ENSG00000163702	IL17RC
ENSDARG00000100985	zbtb7c	21.1956	1.31178	2.48248	0.402823	0.442992	2.96119	0.00306456	0.027922	ENSG00000184828	ZBTB7C
ENSDARG00000036070	znrd1	22.3898	1.31149	2.48197	0.402905	0.509409	2.57453	0.0100378	0.0647636	ENSG00000066379	ZNRD1
ENSDARG00000043010	camk2d1	53.7059	1.31083	2.48085	0.403088	0.322654	4.06265	4.8518e-05	0.0011881	ENSG00000145349	CAMK2D
ENSDARG00000079009	abca1b	253.826	1.31049	2.48025	0.403185	0.400912	3.26877	0.00108017	0.0130752	ENSG00000165029	ABCA1
ENSDARG00000053484	syne2b	73.6542	1.30739	2.47494	0.40405	0.332161	3.93603	8.28408e-05	0.00182331	ENSG00000054654	SYNE2
ENSDARG00000101861	cyp2k19	491.407	1.30716	2.47454	0.404116	0.528674	2.47253	0.0134162	0.0789325	ENSG00000073067	CYP2W1
ENSDARG00000104340	rspo1	17.8955	1.30403	2.46917	0.404994	0.369984	3.52454	0.000424211	0.00632781	ENSG00000169218	RSPO1
ENSDARG00000054786	faah2b	126.003	1.30386	2.46888	0.405041	0.371692	3.5079	0.00045166	0.00665385	ENSG00000165591	FAAH2
ENSDARG00000077284	gdpd5a	20.3036	1.30342	2.46814	0.405164	0.397081	3.28251	0.00102887	0.0125898	ENSG00000158555	GDPD5
ENSDARG00000039697	shtn1	30.3609	1.30025	2.46272	0.406055	0.392651	3.31147	0.000928083	0.0117034	ENSG00000187164	SHTN1
ENSDARG00000022767	apobb.1	37894.5	1.29985	2.46203	0.406169	0.508735	2.55506	0.010617	0.0672357	ENSG00000084674	APOB
ENSDARG00000101901	zgc:193711	41.2794	1.2991	2.46076	0.406379	0.444324	2.92377	0.00345816	0.0302414
ENSDARG00000012927	tcea2	38.4261	1.29896	2.46051	0.406419	0.236457	5.49343	3.94207e-08	3.76114e-06	ENSG00000171703	TCEA2
ENSDARG00000070864	bcl6a	40.6158	1.29781	2.45856	0.406742	0.455809	2.84727	0.00440955	0.0359066	ENSG00000113916	BCL6
ENSDARG00000012076	apoa1a	12540.8	1.29605	2.45555	0.407241	0.429938	3.01449	0.00257408	0.0245282	ENSG00000118137	APOA1
ENSDARG00000041776	ndst3	7.99974	1.29219	2.44899	0.408332	0.477913	2.70381	0.00685496	0.0489257	ENSG00000138653	NDST4
ENSDARG00000041220	ftr53	10.2307	1.29007	2.4454	0.408931	0.465213	2.77307	0.00555294	0.0422253	ENSG00000132481	TRIM47
ENSDARG00000018048	zgc:171704	3.62546	1.2894	2.44426	0.409122	0.454403	2.83757	0.00454589	0.0366918
ENSDARG00000101613	si:dkey-238i5.2	13.9825	1.28472	2.43635	0.41045	0.483637	2.65637	0.00789861	0.0543234
ENSDARG00000104222	inppl1a	185.471	1.28398	2.43509	0.410662	0.174258	7.36824	1.72891e-13	8.64768e-11	ENSG00000165458	INPPL1
ENSDARG00000034211		30.6614	1.28338	2.43409	0.410831	0.405815	3.16248	0.00156431	0.0170023	ENSG00000162909	CAPN2
ENSDARG00000060113	znf395a	161.639	1.28334	2.43401	0.410844	0.401897	3.1932	0.00140706	0.0157502	ENSG00000186918	ZNF395
ENSDARG00000007663	amph	8.80885	1.28199	2.43175	0.411227	0.375165	3.41714	0.000632818	0.00866622	ENSG00000078053	AMPH
ENSDARG00000075343	csf1a	7.36458	1.28175	2.43134	0.411295	0.51348	2.49621	0.0125528	0.0753654
ENSDARG00000058381	zgc:171775	21.1495	1.27986	2.42816	0.411835	0.386572	3.3108	0.000930303	0.0117241
ENSDARG00000019772	si:ch1073-280e3.1	256.731	1.2785	2.42586	0.412225	0.399866	3.19731	0.00138715	0.0156097
ENSDARG00000012600		241.26	1.27719	2.42367	0.412597	0.418224	3.05385	0.00225921	0.0221938	ENSG00000130589	HELZ2
ENSDARG00000104207	pcyt1bb	177.67	1.27476	2.41958	0.413295	0.530194	2.40432	0.0162026	0.0888398	ENSG00000102230	PCYT1B
ENSDARG00000090767	si:ch211-136m16.8	57.0372	1.27468	2.41945	0.413317	0.391359	3.25706	0.00112572	0.0135053
ENSDARG00000069981	cspg5a	23.9397	1.27394	2.41822	0.413528	0.420176	3.03193	0.00242994	0.0235621	ENSG00000114646	CSPG5
ENSDARG00000099803	pik3c2g	37.927	1.27147	2.41408	0.414237	0.276673	4.59557	4.31566e-06	0.000176349	ENSG00000139144	PIK3C2G
ENSDARG00000089050	cuzd1.1	1105.21	1.26968	2.41108	0.414752	0.48001	2.64511	0.00816647	0.0555798	ENSG00000138161	CUZD1
ENSDARG00000004433	btk	14.4141	1.26898	2.4099	0.414954	0.405659	3.12818	0.00175892	0.0185494	ENSG00000010671	BTK
ENSDARG00000024047	tmem38a	385.803	1.26818	2.40858	0.415182	0.465915	2.72192	0.00649039	0.0472234	ENSG00000072954	TMEM38A
ENSDARG00000076265	ano8a	8.0427	1.26724	2.407	0.415455	0.468491	2.70493	0.00683188	0.048814	ENSG00000074855	ANO8
ENSDARG00000039422	fuom	11.0551	1.26692	2.40647	0.415547	0.392335	3.22917	0.0012415	0.0144238	ENSG00000148803	FUOM
ENSDARG00000056986	dact2	29.6992	1.2643	2.40211	0.4163	0.319184	3.96106	7.46183e-05	0.00166958	ENSG00000164488	DACT2
ENSDARG00000077096	fndc7a	14.2046	1.26396	2.40154	0.416399	0.349206	3.61953	0.000295138	0.00483381	ENSG00000143107	FNDC7
ENSDARG00000076448	serpinf2a	232.476	1.26349	2.40076	0.416535	0.469925	2.6887	0.00717299	0.050571	ENSG00000167711	SERPINF2
ENSDARG00000076270	adamts13	77.2348	1.26329	2.40043	0.416593	0.419408	3.01208	0.00259467	0.024628	ENSG00000160323	ADAMTS13
ENSDARG00000027196	si:dkey-16l2.17	9.56886	1.262	2.39828	0.416965	0.464475	2.71705	0.00658669	0.0477181	ENSG00000116176	TPSG1
ENSDARG00000089223	ngfrb	8.76558	1.26018	2.39526	0.417492	0.473117	2.66357	0.00773162	0.0535024	ENSG00000064300	NGFR
ENSDARG00000025703	dmgdh	91.6489	1.25947	2.39408	0.417698	0.312386	4.03177	5.53587e-05	0.00131686	ENSG00000132837	DMGDH
ENSDARG00000016939	itgb2	68.1402	1.25838	2.39227	0.418013	0.365213	3.44561	0.000569779	0.00799786	ENSG00000160255	ITGB2
ENSDARG00000104531	zcchc4	11.1725	1.25701	2.39	0.41841	0.376499	3.33868	0.000841783	0.010852	ENSG00000168228	ZCCHC4
ENSDARG00000021137	adgrv1	39.051	1.25698	2.38994	0.41842	0.518323	2.42508	0.0153049	0.0855406	ENSG00000164199	ADGRV1
ENSDARG00000071500	fam207a	46.3973	1.25617	2.3886	0.418655	0.377642	3.32634	0.000879947	0.0112082	ENSG00000160256	FAM207A
ENSDARG00000075823		4.6056	1.25473	2.38623	0.419071	0.401004	3.12897	0.00175418	0.0185284	ENSG00000168916	ZNF608
ENSDARG00000089456	men1	57.9225	1.2546	2.38601	0.41911	0.299863	4.18391	2.86541e-05	0.000795189	ENSG00000133895	MEN1
ENSDARG00000068557	htr5ab	6.88926	1.25412	2.38521	0.41925	0.513744	2.44113	0.0146412	0.0831177	ENSG00000157219	HTR5A
ENSDARG00000011445	elmsan1a	55.717	1.25376	2.38461	0.419355	0.241455	5.1925	2.07493e-07	1.51228e-05	ENSG00000156030	ELMSAN1
ENSDARG00000074604	phc3	29.4105	1.25326	2.38379	0.419499	0.351669	3.56374	0.000365603	0.00569289	ENSG00000173889	PHC3
ENSDARG00000071876	rell2	8.32587	1.25128	2.38053	0.420075	0.453139	2.76136	0.00575612	0.0433466	ENSG00000164620	RELL2
ENSDARG00000069242	pdia5	227.315	1.25099	2.38004	0.420161	0.239726	5.2184	1.80478e-07	1.35708e-05	ENSG00000065485	PDIA5
ENSDARG00000078151		8.59388	1.25001	2.37842	0.420447	0.415424	3.00899	0.00262121	0.0248566	ENSG00000105737	GRIK5
ENSDARG00000039406	prom2	48.3498	1.24868	2.37624	0.420833	0.338119	3.69302	0.000221603	0.00392158	ENSG00000155066	PROM2
ENSDARG00000010312	cp	3334.44	1.24725	2.37389	0.42125	0.408296	3.05478	0.00225226	0.022147
ENSDARG00000005943	htra4	5.04293	1.24716	2.37373	0.421277	0.485384	2.56943	0.0101867	0.06537	ENSG00000169495	HTRA4
ENSDARG00000013843	sept5a	10.6747	1.24287	2.36668	0.422532	0.405506	3.06498	0.00217684	0.021605	ENSG00000184702	SEPT5
ENSDARG00000001818	c3b.2	541.266	1.24124	2.36402	0.423008	0.349085	3.55571	0.000376959	0.00579389
ENSDARG00000000370	triob	53.3398	1.23994	2.36189	0.42339	0.238046	5.20882	1.90045e-07	1.40807e-05	ENSG00000038382	TRIO
ENSDARG00000076239	si:ch211-74f19.2	64.4819	1.23856	2.35962	0.423797	0.423964	2.92137	0.00348495	0.030423	ENSG00000101220	C20orf27
ENSDARG00000021004	c5	402.428	1.23832	2.35923	0.423867	0.394615	3.13804	0.00170085	0.0180952	ENSG00000106804	C5
ENSDARG00000025953	rhoq	57.1982	1.2376	2.35805	0.424079	0.453397	2.72961	0.00634092	0.0465016	ENSG00000119729	RHOQ
ENSDARG00000006923	cacna1ab	14.9525	1.23737	2.35769	0.424144	0.328287	3.76919	0.000163779	0.00311936	ENSG00000141837	CACNA1A
ENSDARG00000003250	pik3cd	34.7188	1.23565	2.35487	0.424652	0.329789	3.74679	0.000179114	0.00333912	ENSG00000171608	PIK3CD
ENSDARG00000079396	lrfn5b	13.4073	1.23406	2.35228	0.425119	0.421305	2.92914	0.00339903	0.0299052	ENSG00000165379	LRFN5
ENSDARG00000061800	si:dkey-208k22.6	12.6366	1.23349	2.35135	0.425288	0.452727	2.72457	0.00643849	0.046964
ENSDARG00000025855	camk2n1a	12.6875	1.23204	2.34898	0.425716	0.503383	2.44751	0.0143846	0.0822841	ENSG00000163888	CAMK2N2
ENSDARG00000075180	tmem14ca	30.6119	1.22951	2.34487	0.426463	0.377864	3.25383	0.00113859	0.0136032	ENSG00000111843	TMEM14C
ENSDARG00000037140	pfkfb1	68.7452	1.22924	2.34444	0.426541	0.325627	3.775	0.000160007	0.00305614	ENSG00000158571	PFKFB1
ENSDARG00000013174	nkd3	13.5324	1.22854	2.3433	0.426749	0.379667	3.23584	0.00121286	0.0141806	ENSG00000145506	NKD2
ENSDARG00000095863	afp4	2500.77	1.2282	2.34275	0.42685	0.456607	2.68984	0.00714864	0.0504447
ENSDARG00000058322	enc3	67.1189	1.22437	2.33654	0.427983	0.32728	3.74106	0.000183243	0.00338799
ENSDARG00000029239	syt9b	6.46499	1.22433	2.33646	0.427997	0.510051	2.4004	0.0163773	0.0895211	ENSG00000170743	SYT9
ENSDARG00000015025	nadl1.1	18.0373	1.22042	2.33015	0.429157	0.435022	2.80543	0.00502497	0.0394565	ENSG00000198910	L1CAM
ENSDARG00000014053	olfm1b	36.4561	1.21619	2.32333	0.430417	0.495604	2.45397	0.014129	0.0813748	ENSG00000130558	OLFM1
ENSDARG00000086903	gig2o	30.3671	1.2147	2.32092	0.430864	0.336594	3.60879	0.000307629	0.00498192
ENSDARG00000060566	cluhb	6.9853	1.21398	2.31977	0.431078	0.33609	3.61206	0.000303769	0.00494712	ENSG00000132361	CLUH
ENSDARG00000100793	CR450785.1	9.33197	1.21377	2.31943	0.431141	0.503482	2.41075	0.0159197	0.087979
ENSDARG00000039577	ptk2bb	62.3436	1.21353	2.31904	0.431212	0.227062	5.34449	9.06711e-08	7.60997e-06	ENSG00000120899	PTK2B
ENSDARG00000073707	cnksr2b	7.51564	1.2084	2.31082	0.432747	0.504485	2.39532	0.0166059	0.090244	ENSG00000149970	CNKSR2
ENSDARG00000096365	si:ch211-195m9.3	23.2276	1.20795	2.31009	0.432884	0.3955	3.05423	0.00225639	0.0221769
ENSDARG00000061763	spata5l1	48.6692	1.20667	2.30805	0.433266	0.331558	3.63941	0.000273264	0.00457938	ENSG00000171763	SPATA5L1
ENSDARG00000024561	nolc1	535.174	1.20641	2.30763	0.433344	0.270603	4.45825	8.26317e-06	0.000294778	ENSG00000166197	NOLC1
ENSDARG00000094984	si:ch211-197g15.8	7.77315	1.20495	2.3053	0.433783	0.418683	2.87796	0.00400256	0.0335515
ENSDARG00000056314	a2ml	857.142	1.20023	2.29777	0.435205	0.389732	3.07964	0.00207254	0.0209711
ENSDARG00000093068	c3b.1	475.115	1.19963	2.2968	0.435387	0.340212	3.52612	0.000421703	0.0062997
ENSDARG00000092225	si:dkeyp-13a3.10	22.2628	1.19477	2.28909	0.436855	0.36766	3.24967	0.00115539	0.0137471
ENSDARG00000077388	obsl1b	120.324	1.19059	2.28247	0.438122	0.43308	2.74914	0.00597527	0.0445163	ENSG00000124006	OBSL1
ENSDARG00000044405	ttc4	46.3535	1.18937	2.28053	0.438494	0.239365	4.96887	6.73454e-07	3.94839e-05	ENSG00000243725	TTC4
ENSDARG00000062042	mthfsd	10.7098	1.18746	2.27752	0.439074	0.493323	2.40707	0.016081	0.088461	ENSG00000103248	MTHFSD
ENSDARG00000040469	enpp6	81.8224	1.18715	2.27702	0.439171	0.435126	2.72828	0.00636651	0.0465606	ENSG00000164303	ENPP6
ENSDARG00000020866	apoa4b.2	4523.99	1.18545	2.27435	0.439687	0.459379	2.58056	0.00986415	0.0638675	ENSG00000110244	APOA4
ENSDARG00000030632	ccdc3b	44.2056	1.18524	2.27401	0.439752	0.430275	2.75461	0.00587629	0.0439732
ENSDARG00000001994	stxbp1a	29.3136	1.18521	2.27396	0.439761	0.341892	3.46662	0.000527045	0.00749073	ENSG00000136854	STXBP1
ENSDARG00000035837	zgc:153595	7.3831	1.18484	2.27337	0.439875	0.47406	2.49934	0.0124427	0.0749546
ENSDARG00000054583	mfsd6b	44.5319	1.18453	2.27289	0.439969	0.481855	2.45826	0.0139611	0.0808961	ENSG00000151690	MFSD6
ENSDARG00000094537	si:ch211-137i24.12	8.65205	1.18327	2.27091	0.440352	0.505698	2.33988	0.01929	0.0999948
ENSDARG00000086362	pou6f2	7.26437	1.18173	2.26849	0.440821	0.504045	2.3445	0.0190526	0.0991704	ENSG00000106536	POU6F2
ENSDARG00000076174	trim2b	14.4495	1.18038	2.26637	0.441235	0.345742	3.41406	0.000640028	0.00875311	ENSG00000109654	TRIM2
ENSDARG00000024229	ubl7a	22.1242	1.17798	2.2626	0.441969	0.280662	4.19716	2.7028e-05	0.000758247	ENSG00000138629	UBL7
ENSDARG00000033845	igsf9ba	17.7683	1.17797	2.26257	0.441974	0.311283	3.78422	0.00015419	0.00295866	ENSG00000080854	IGSF9B
ENSDARG00000058068	tnfsf10l4	17.9718	1.17761	2.26201	0.442084	0.455545	2.58505	0.00973656	0.0631627
ENSDARG00000040298	apoa4b.1	2243.72	1.17419	2.25667	0.443131	0.436262	2.69149	0.0071134	0.0503087	ENSG00000110244	APOA4
ENSDARG00000100095	anxa1b	52.7175	1.17371	2.25591	0.443279	0.460673	2.54782	0.0108398	0.0682616	ENSG00000135046	ANXA1
ENSDARG00000029881	kcnh2a	6.50465	1.17032	2.25061	0.444323	0.444908	2.63048	0.00852656	0.0573875	ENSG00000055118	KCNH2
ENSDARG00000103766	cyp2aa7	34.4458	1.16989	2.24994	0.444456	0.495467	2.36118	0.0182169	0.096065
ENSDARG00000036383	si:ch73-335m24.5	10.5857	1.16877	2.2482	0.4448	0.408038	2.86437	0.00417838	0.0345952
ENSDARG00000021702	pdcd4a	290.412	1.16844	2.24768	0.444904	0.12514	9.33699	9.91086e-21	2.86381e-17
ENSDARG00000044719	nrsn1	9.26927	1.167	2.24544	0.445346	0.418263	2.79011	0.00526901	0.0408494	ENSG00000152954	NRSN1
ENSDARG00000087181	cbx7b	5.73333	1.16649	2.24465	0.445505	0.470794	2.4777	0.0132232	0.0782034	ENSG00000100307	CBX7
ENSDARG00000018757	klf5l	68.7323	1.16527	2.24276	0.44588	0.452043	2.5778	0.00994328	0.0642976
ENSDARG00000076171	znf827	134.824	1.16461	2.24172	0.446086	0.307575	3.78642	0.000152835	0.00294418	ENSG00000151612	ZNF827
ENSDARG00000035009	trim35-27	19.6602	1.16446	2.24149	0.446133	0.478882	2.43161	0.0150317	0.0845679	ENSG00000104228	TRIM35
ENSDARG00000068586	CDHR2	1736.69	1.1639	2.24062	0.446305	0.421402	2.76197	0.00574543	0.0432822	ENSG00000074276	CDHR2
ENSDARG00000104188	fam83fb	23.2519	1.16326	2.23963	0.446503	0.406905	2.85879	0.00425256	0.0350087	ENSG00000133477	FAM83F
ENSDARG00000056639	rltpr	46.5522	1.16135	2.23667	0.447094	0.475717	2.44126	0.014636	0.0831111	ENSG00000159753	CARMIL2
ENSDARG00000098221	st8sia1	8.37339	1.16129	2.23658	0.447112	0.373531	3.10896	0.0018775	0.0194949	ENSG00000111728	ST8SIA1
ENSDARG00000031100	ivns1abpa	382.907	1.16093	2.23602	0.447223	0.330738	3.51014	0.000447877	0.00660292	ENSG00000116679	IVNS1ABP
ENSDARG00000004635	epha7	15.4523	1.1595	2.23379	0.447669	0.322094	3.59986	0.000318384	0.00512107	ENSG00000135333	EPHA7
ENSDARG00000060094	ptgis	6.03238	1.15846	2.23219	0.44799	0.440798	2.6281	0.00858635	0.057622	ENSG00000124212	PTGIS
ENSDARG00000102824	pcdh10b	24.0205	1.15347	2.22448	0.449544	0.452672	2.54813	0.0108304	0.0682235	ENSG00000138650	PCDH10
ENSDARG00000040466	vil1	2792.11	1.15247	2.22293	0.449856	0.335518	3.43488	0.000592815	0.00826065	ENSG00000127831	VIL1
ENSDARG00000033320	sar1ab	55.9999	1.15125	2.22106	0.450235	0.403147	2.85566	0.0042948	0.0352132	ENSG00000079332	SAR1A
ENSDARG00000092360	si:ch211-51h9.6	30.657	1.14831	2.21653	0.451155	0.319241	3.59699	0.000321923	0.00516788	ENSG00000242259	C22orf39
ENSDARG00000102369	st3gal2	22.0527	1.1483	2.21653	0.451156	0.352099	3.2613	0.00110901	0.013341	ENSG00000157350	ST3GAL2
ENSDARG00000062231	znf362b	13.0523	1.14749	2.21528	0.45141	0.449449	2.5531	0.0106768	0.0675083	ENSG00000160094	ZNF362
ENSDARG00000094345	si:dkey-261l7.2	25.3745	1.14693	2.21442	0.451585	0.43604	2.63033	0.00853012	0.0573875
ENSDARG00000002634	b4galt1	13.1969	1.14484	2.21122	0.45224	0.45328	2.52568	0.0115475	0.0712291	ENSG00000086062	B4GALT1
ENSDARG00000003381	si:ch211-266g18.6	17.1843	1.14315	2.20862	0.452771	0.354122	3.22811	0.00124612	0.0144443
ENSDARG00000096546	nrp2a	60.5806	1.14166	2.20635	0.453238	0.40642	2.80906	0.00496867	0.0392123	ENSG00000118257	NRP2
ENSDARG00000075393	spock2	8.94215	1.14143	2.206	0.453309	0.473172	2.4123	0.0158522	0.0877033	ENSG00000107742	SPOCK2
ENSDARG00000068148	arrdc1a	63.7653	1.14143	2.20599	0.45331	0.321486	3.55048	0.000384536	0.00588548	ENSG00000197070	ARRDC1
ENSDARG00000099185	chia.2	8907.01	1.14095	2.20527	0.45346	0.458915	2.4862	0.0129116	0.0768352	ENSG00000085465	OVGP1
ENSDARG00000033234	stmn2a	32.7141	1.13949	2.20304	0.453919	0.395533	2.88091	0.00396532	0.0333222
ENSDARG00000095339	si:dkeyp-44a8.4	19.0554	1.13916	2.20253	0.454024	0.401089	2.84017	0.00450899	0.0365105	ENSG00000050767	COL23A1
ENSDARG00000060149	ablim1a	10.9742	1.13911	2.20245	0.454039	0.456122	2.49739	0.0125113	0.0752349	ENSG00000099204	ABLIM1
ENSDARG00000061651	marveld2b	18.2282	1.13905	2.20236	0.454059	0.281953	4.03985	5.34856e-05	0.00129099	ENSG00000152939	MARVELD2
ENSDARG00000077018	socs7	7.91966	1.13787	2.20057	0.454429	0.447647	2.5419	0.0110251	0.0690206	ENSG00000274211	SOCS7
ENSDARG00000075444	cgref1	194.262	1.13528	2.19662	0.455246	0.320435	3.54294	0.000395691	0.00601325	ENSG00000138028	CGREF1
ENSDARG00000037101	mtmr7a	22.4568	1.13476	2.19583	0.455409	0.417051	2.72093	0.00650992	0.0472975	ENSG00000003987	MTMR7
ENSDARG00000077428	camta1a	21.8488	1.13461	2.19559	0.455458	0.305019	3.7198	0.00019938	0.00359114	ENSG00000171735	CAMTA1
ENSDARG00000002507	itga10	43.6603	1.13009	2.18873	0.456887	0.430039	2.62788	0.00859188	0.057622	ENSG00000143127	ITGA10
ENSDARG00000025608	casp6l1	12.9006	1.12831	2.18603	0.45745	0.465338	2.42472	0.0153202	0.0856026
ENSDARG00000079752	col6a4a	211.049	1.12802	2.18558	0.457544	0.263499	4.28092	1.86123e-05	0.00056783
ENSDARG00000017661	braf	37.6493	1.12187	2.17629	0.459497	0.249123	4.50329	6.69101e-06	0.000249907	ENSG00000157764	BRAF
ENSDARG00000063612	antxr1c	121.216	1.12077	2.17463	0.459847	0.253846	4.41516	1.00934e-05	0.00034644
ENSDARG00000004177	fam169ab	22.3959	1.1206	2.17437	0.459904	0.261991	4.27722	1.89238e-05	0.000573629	ENSG00000198780	FAM169A
ENSDARG00000095580	si:ch211-67e16.11	13.491	1.11971	2.17303	0.460187	0.427234	2.62083	0.00877162	0.058517
ENSDARG00000090721	prdm2a	27.9801	1.1186	2.17136	0.460541	0.319192	3.50446	0.000457526	0.00671094	ENSG00000116731	PRDM2
ENSDARG00000019516	sp7	86.3131	1.11831	2.17092	0.460634	0.30554	3.6601	0.000252114	0.00431963	ENSG00000170374	SP7
ENSDARG00000001969	txlng	83.0141	1.11826	2.17085	0.460649	0.297187	3.76282	0.000168011	0.00318198	ENSG00000086712	TXLNG
ENSDARG00000006220	ugt1ab	1180.79	1.11811	2.17063	0.460696	0.361772	3.09066	0.00199715	0.0204229	ENSG00000244122	UGT1A7
ENSDARG00000054916	eif4ebp3	76.8776	1.11738	2.16952	0.460931	0.31455	3.5523	0.000381881	0.00586062	ENSG00000243056	EIF4EBP3
ENSDARG00000074671	nptx1l	15.2828	1.11514	2.16616	0.461646	0.292708	3.80974	0.000139111	0.00273345	ENSG00000171246	NPTX1
ENSDARG00000076657	plagl2	21.5814	1.11409	2.16458	0.461983	0.293454	3.79646	0.000146776	0.00286016	ENSG00000126003	PLAGL2
ENSDARG00000039133	lamb4	13.0673	1.11327	2.16335	0.462245	0.390866	2.84821	0.00439652	0.0358294	ENSG00000091128	LAMB4
ENSDARG00000016739	LRRC4C	4.94468	1.11221	2.16176	0.462585	0.454715	2.44595	0.0144472	0.0825257	ENSG00000148948	LRRC4C
ENSDARG00000091111		31.5012	1.11203	2.16149	0.462644	0.266783	4.16828	3.06913e-05	0.000836647	ENSG00000145365	TIFA
ENSDARG00000068515	chs1	1811.87	1.10871	2.15653	0.463709	0.317611	3.49077	0.000481626	0.0069734
ENSDARG00000041150	slc17a6b	7.5544	1.10738	2.15454	0.464136	0.402779	2.74935	0.00597136	0.0445036	ENSG00000091664	SLC17A6
ENSDARG00000033735	ncf1	92.7469	1.10566	2.15197	0.464691	0.379153	2.91613	0.00354407	0.030727	ENSG00000158517	NCF1
ENSDARG00000099307	si:dkey-10p5.10	16.1917	1.10505	2.15106	0.464887	0.336065	3.2882	0.0010083	0.012418
ENSDARG00000045858	tigarb	10.1633	1.10482	2.15072	0.464961	0.428691	2.57719	0.0099607	0.0643847	ENSG00000078237	TIGAR
ENSDARG00000075334	arhgap32a	162.856	1.1046	2.15039	0.465032	0.301383	3.6651	0.00024724	0.00425729	ENSG00000134909	ARHGAP32
ENSDARG00000018985	gatsl2	100.907	1.10324	2.14837	0.46547	0.346364	3.1852	0.00144653	0.0160763	ENSG00000239521	GATS
ENSDARG00000102975	hmp19	16.9944	1.10303	2.14805	0.465539	0.346443	3.18387	0.00145322	0.016103	ENSG00000170091	NSG2
ENSDARG00000063665	mat2al	107.388	1.10228	2.14694	0.465779	0.336539	3.27535	0.00105531	0.0128511
ENSDARG00000055698	pcnxl2	5.771	1.10208	2.14663	0.465846	0.458125	2.40562	0.0161451	0.0887023	ENSG00000135749	PCNX2
ENSDARG00000076856	frem2a	16.8942	1.10206	2.14661	0.465852	0.28323	3.89103	9.98198e-05	0.00211863	ENSG00000150893	FREM2
ENSDARG00000033950	lamb2l	90.1949	1.10192	2.1464	0.465895	0.267643	4.11714	3.83611e-05	0.00099097
ENSDARG00000100607	zbtb38	19.5626	1.10186	2.14632	0.465914	0.366982	3.0025	0.0026777	0.0251682	ENSG00000177311	ZBTB38
ENSDARG00000020795	rac3b	35.2983	1.10115	2.14525	0.466146	0.352416	3.12457	0.00178066	0.0187006	ENSG00000169750	RAC3
ENSDARG00000077906	rnf165a	16.2548	1.10001	2.14357	0.466512	0.349834	3.14439	0.00166433	0.0178307	ENSG00000141622	RNF165
ENSDARG00000101866	asic1b	14.9809	1.09712	2.13927	0.467448	0.36782	2.98277	0.00285657	0.0264439
ENSDARG00000076308	pdp1	92.1485	1.09701	2.13911	0.467484	0.301263	3.64137	0.000271186	0.00455967	ENSG00000164951	PDP1
ENSDARG00000070809	znf516	19.8924	1.09674	2.13871	0.467571	0.319275	3.43511	0.000592314	0.00826065	ENSG00000101493	ZNF516
ENSDARG00000038228	sepw2a	241.513	1.09575	2.13724	0.467893	0.169654	6.45872	1.0559e-10	2.4549e-08	ENSG00000141741	MIEN1
ENSDARG00000004954	grna	132.742	1.0941	2.13479	0.46843	0.315746	3.46512	0.000529998	0.007523
ENSDARG00000103956	si:dkey-17o15.2	33.2757	1.09323	2.13352	0.46871	0.351821	3.10736	0.00188767	0.0195905
ENSDARG00000108788	ARSB	77.7045	1.09311	2.13333	0.46875	0.259112	4.21868	2.45735e-05	0.00070304	ENSG00000113273	ARSB
ENSDARG00000088505	fam217b	25.9537	1.09295	2.1331	0.468802	0.25311	4.31808	1.5739e-05	0.000498205	ENSG00000196227	FAM217B
ENSDARG00000010727	ttyh2l	20.1733	1.09207	2.13179	0.469088	0.44421	2.45845	0.0139539	0.0808961	ENSG00000141540	TTYH2
ENSDARG00000017773	slc16a12a	64.3946	1.09067	2.12973	0.469543	0.345707	3.1549	0.00160552	0.0173432	ENSG00000152779	SLC16A12
ENSDARG00000089271	NEXMIF (1 of many)	18.3926	1.08903	2.12731	0.470077	0.365098	2.98285	0.00285579	0.0264439	ENSG00000050030	NEXMIF
ENSDARG00000015879	pax8	8.31116	1.08674	2.12394	0.470823	0.398214	2.72904	0.00635193	0.046534	ENSG00000125618	PAX8
ENSDARG00000006899	far1	62.0947	1.08602	2.12288	0.471058	0.178031	6.1002	1.05936e-09	1.66106e-07	ENSG00000197601	FAR1
ENSDARG00000014259	eya1	47.9726	1.0848	2.12108	0.471457	0.416221	2.60631	0.00915236	0.0604658	ENSG00000104313	EYA1
ENSDARG00000018382	prkcha	32.661	1.08469	2.12093	0.471492	0.312419	3.47192	0.000516744	0.00737628	ENSG00000027075	PRKCH
ENSDARG00000061398	epb41l4b	26.3569	1.0836	2.11932	0.47185	0.367716	2.94684	0.0032104	0.0287645	ENSG00000095203	EPB41L4B
ENSDARG00000044691	ppp1r3b	177.531	1.08264	2.11791	0.472164	0.434627	2.49096	0.0127397	0.0760587	ENSG00000173281	PPP1R3B
ENSDARG00000103743	si:dkeyp-72e1.9	15.5194	1.08156	2.11633	0.472517	0.373456	2.89609	0.00377839	0.0322607
ENSDARG00000020387	nipsnap3a	82.6921	1.07623	2.10852	0.474265	0.28778	3.73978	0.000184183	0.00339184	ENSG00000136783	NIPSNAP3A
ENSDARG00000098368	aplp1	234.125	1.07568	2.10772	0.474446	0.273983	3.92609	8.63372e-05	0.00188387	ENSG00000105290	APLP1
ENSDARG00000101394	fam69b	7.48874	1.07553	2.10749	0.474497	0.398853	2.69655	0.00700612	0.0498287	ENSG00000165716	FAM69B
ENSDARG00000032553	egln3	42.7523	1.07506	2.1068	0.474653	0.359832	2.98766	0.00281122	0.0261296	ENSG00000129521	EGLN3
ENSDARG00000088810	prox1b	8.00441	1.07452	2.10602	0.474829	0.442137	2.43029	0.0150867	0.0847934
ENSDARG00000058127	hcfc2	33.3549	1.07384	2.10503	0.475052	0.217505	4.93711	7.92902e-07	4.40605e-05	ENSG00000111727	HCFC2
ENSDARG00000099425		249.927	1.07193	2.10224	0.475683	0.35751	2.99832	0.00271473	0.0253396	ENSG00000205403	CFI
ENSDARG00000067848	nmrk2	192.643	1.07116	2.10112	0.475936	0.441194	2.42787	0.0151878	0.0851689	ENSG00000077009	NMRK2
ENSDARG00000075264	si:dkeyp-74a11.1	5.82335	1.06839	2.09709	0.476851	0.443953	2.40653	0.0161047	0.0885669
ENSDARG00000028131	hccsa.1	22.7112	1.06473	2.09178	0.478062	0.392448	2.71305	0.00666674	0.0480742	ENSG00000004961	HCCS
ENSDARG00000070669	cxcr3.3	16.8007	1.06368	2.09025	0.478412	0.402333	2.64377	0.00819877	0.0557809
ENSDARG00000011208		19.5455	1.06166	2.08733	0.479081	0.327122	3.24545	0.00117265	0.0138953	ENSG00000135940	COX5B
ENSDARG00000090851	ciita	9.07866	1.06076	2.08603	0.479381	0.358328	2.9603	0.0030734	0.0279417	ENSG00000179583	CIITA
ENSDARG00000089858	cobll1a	23.8496	1.05897	2.08344	0.479974	0.399769	2.64896	0.00807405	0.0551704	ENSG00000082438	COBLL1
ENSDARG00000042974	sypa	12.6096	1.05576	2.07881	0.481044	0.382621	2.75928	0.00579284	0.0435097	ENSG00000102003	SYP
ENSDARG00000021891	zbtb7b	42.9242	1.05186	2.0732	0.482346	0.281123	3.74164	0.000182825	0.00338335	ENSG00000160685	ZBTB7B
ENSDARG00000039181	trpm3	5.59418	1.05156	2.07277	0.482447	0.394662	2.66445	0.00771151	0.053418	ENSG00000083067	TRPM3
ENSDARG00000009886	rnf114	44.8509	1.05132	2.07243	0.482526	0.357204	2.94319	0.00324846	0.0289967	ENSG00000124226	RNF114
ENSDARG00000010962	fkbp7	55.5564	1.04996	2.07047	0.482983	0.358727	2.9269	0.0034236	0.0300431	ENSG00000079150	FKBP7
ENSDARG00000019874	hsph1	9.17393	1.04923	2.06942	0.483226	0.390331	2.68805	0.00718704	0.0506347	ENSG00000120694	HSPH1
ENSDARG00000063244	lix1l	44.4475	1.04593	2.06469	0.484333	0.292022	3.58167	0.000341402	0.00541186	ENSG00000271601	LIX1L
ENSDARG00000004861	esrrga	8.2524	1.0453	2.0638	0.484543	0.376035	2.7798	0.00543921	0.0417242	ENSG00000196482	ESRRG
ENSDARG00000024195	znf395b	52.4951	1.04483	2.06313	0.484701	0.190751	5.47746	4.31464e-08	4.00331e-06	ENSG00000186918	ZNF395
ENSDARG00000075041	fmnl2b	17.1467	1.04416	2.06217	0.484926	0.3545	2.94545	0.00322483	0.0288494	ENSG00000157827	FMNL2
ENSDARG00000016981	bcar3	33.4603	1.04198	2.05904	0.485662	0.33232	3.13546	0.00171585	0.018235	ENSG00000137936	BCAR3
ENSDARG00000089871	jcada	55.5238	1.04032	2.05668	0.486221	0.386185	2.69383	0.00706356	0.0500963	ENSG00000165757	JCAD
ENSDARG00000022020	focad	70.9707	1.04015	2.05644	0.486278	0.308159	3.37536	0.000737204	0.00982308	ENSG00000188352	FOCAD
ENSDARG00000099412	bcan	74.605	1.03921	2.0551	0.486595	0.331601	3.13391	0.00172494	0.0182863	ENSG00000132692	BCAN
ENSDARG00000019930	tal1	18.1469	1.03832	2.05384	0.486892	0.442413	2.34696	0.0189274	0.0986968	ENSG00000162367	TAL1
ENSDARG00000036558	col18a1a	216.59	1.03812	2.05354	0.486963	0.29075	3.57048	0.000356328	0.00558261	ENSG00000182871	COL18A1
ENSDARG00000008732	zgc:66479	130.519	1.03809	2.05351	0.486972	0.353165	2.93939	0.00328859	0.029247
ENSDARG00000055360	llph	63.064	1.03712	2.05213	0.4873	0.296503	3.49783	0.000469052	0.00683539	ENSG00000139233	LLPH
ENSDARG00000086158	ccbe1	12.7202	1.03671	2.05154	0.487439	0.415159	2.49713	0.0125202	0.0752576	ENSG00000183287	CCBE1
ENSDARG00000014329	npm1a	1024.13	1.03593	2.05044	0.487701	0.193531	5.35278	8.66117e-08	7.3609e-06	ENSG00000181163	NPM1
ENSDARG00000030297	sox13	65.7347	1.03425	2.04805	0.488269	0.259805	3.98088	6.8661e-05	0.00156574	ENSG00000143842	SOX13
ENSDARG00000060330	si:ch211-284e13.4	8.95513	1.03319	2.04654	0.48863	0.37139	2.78194	0.00540349	0.0415892
ENSDARG00000063553	rlf	231.596	1.03314	2.04647	0.488647	0.353114	2.92579	0.00343582	0.0301111	ENSG00000117000	RLF
ENSDARG00000101979	eps8l3a	229.488	1.03098	2.04341	0.489379	0.292682	3.52251	0.000427475	0.00636711	ENSG00000198758	EPS8L3
ENSDARG00000061379	cmya5	91.2421	1.02973	2.04165	0.4898	0.370821	2.7769	0.00548797	0.0418979	ENSG00000164309	CMYA5
ENSDARG00000101089	gart	77.9059	1.02875	2.04026	0.490133	0.326482	3.15103	0.00162698	0.0175047	ENSG00000159131	GART
ENSDARG00000092624	SPTBN4	10.7195	1.02863	2.04009	0.490174	0.28499	3.60937	0.000306945	0.00497881	ENSG00000160460	SPTBN4
ENSDARG00000053535	lmo7b	174.882	1.02841	2.03978	0.49025	0.340299	3.02208	0.00251046	0.0241121	ENSG00000136153	LMO7
ENSDARG00000086034	pvrl1b	41.763	1.02813	2.03937	0.490347	0.329861	3.11685	0.00182795	0.0190734	ENSG00000110400	NECTIN1
ENSDARG00000037958	nosip	37.0912	1.02447	2.03421	0.491592	0.238773	4.29055	1.78228e-05	0.000547044	ENSG00000142546	NOSIP
ENSDARG00000005789	enpp1	71.1244	1.02228	2.03112	0.492338	0.335219	3.04958	0.0022916	0.0224575	ENSG00000197594	ENPP1
ENSDARG00000061844	si:dkey-38p12.3	83.2934	1.0201	2.02806	0.493082	0.295771	3.44895	0.000562762	0.00791035	ENSG00000198844	ARHGEF15
ENSDARG00000071026	mllt11	73.101	1.01807	2.02521	0.493777	0.348801	2.91877	0.00351418	0.0305595	ENSG00000213190	MLLT11
ENSDARG00000091548	stard9	59.9111	1.01794	2.02503	0.49382	0.364592	2.79201	0.00523815	0.0406413	ENSG00000159433	STARD9
ENSDARG00000062266	edc4	317.42	1.01726	2.02407	0.494055	0.216138	4.70652	2.51986e-06	0.000111287	ENSG00000038358	EDC4
ENSDARG00000004060	bhlhe40	273.063	1.01631	2.02274	0.49438	0.3645	2.78823	0.00529971	0.0409916	ENSG00000134107	BHLHE40
ENSDARG00000036008	caly	9.11598	1.01552	2.02163	0.49465	0.402051	2.52584	0.0115421	0.0712287	ENSG00000130643	CALY
ENSDARG00000098112	btc	35.5731	1.01501	2.02092	0.494825	0.266759	3.80497	0.000141822	0.0027743	ENSG00000174808	BTC
ENSDARG00000096346	si:ch211-85n16.3	21.2015	1.01467	2.02044	0.49494	0.388525	2.6116	0.00901197	0.0596678
ENSDARG00000030604	phkg1a	24.8031	1.01395	2.01943	0.49519	0.38659	2.6228	0.00872115	0.0583095	ENSG00000164776	PHKG1
ENSDARG00000074852	myo15b	539.013	1.01379	2.01921	0.495244	0.318559	3.18242	0.00146049	0.0161604	ENSG00000266714	MYO15B
ENSDARG00000055540	pfkfb4a	99.5153	1.01371	2.0191	0.495271	0.309837	3.27175	0.00106882	0.0129651	ENSG00000114268	PFKFB4
ENSDARG00000002830	trmt2a	65.8589	1.011	2.01531	0.496201	0.287243	3.51969	0.000432057	0.00641646	ENSG00000099899	TRMT2A
ENSDARG00000062758	CR352265.1	8.4758	1.01072	2.01491	0.4963	0.315343	3.20513	0.00135	0.0153493
ENSDARG00000038072	ptx4	10.9324	1.01026	2.01427	0.496458	0.409385	2.46774	0.013597	0.0795792	ENSG00000251692	PTX4
ENSDARG00000035887	zgc:91944	69.6997	1.00945	2.01314	0.496736	0.206326	4.8925	9.95632e-07	5.2719e-05
ENSDARG00000036237	slc27a2a	478.185	1.00616	2.00856	0.497869	0.410688	2.44994	0.0142879	0.0819166	ENSG00000140284	SLC27A2
ENSDARG00000077911	treh	61.1022	1.00611	2.00849	0.497886	0.309571	3.25002	0.00115397	0.0137383	ENSG00000118094	TREH
ENSDARG00000098161	cntn4	10.3911	1.00596	2.00827	0.49794	0.395061	2.54633	0.0108862	0.0684048
ENSDARG00000016541	sash3	16.4148	1.00352	2.00489	0.498781	0.327731	3.06203	0.00219839	0.0217548	ENSG00000122122	SASH3
ENSDARG00000087666	fibpb	10.628	1.00336	2.00466	0.498839	0.309515	3.2417	0.0011882	0.0140057	ENSG00000172500	FIBP
ENSDARG00000024465	mrps18a	83.6095	1.00263	2.00365	0.499089	0.227486	4.40744	1.04598e-05	0.000354983	ENSG00000096080	MRPS18A
ENSDARG00000038153	lgals2b	2019.37	1.00163	2.00226	0.499435	0.41288	2.42596	0.0152679	0.0853932	ENSG00000100097	LGALS1
ENSDARG00000013153	dennd3b	8.33918	1.00017	2.00024	0.49994	0.389635	2.56695	0.0102597	0.0656032	ENSG00000105339	DENND3
ENSDARG00000099708	cacna1hb	7.76341	0.999995	1.99999	0.500002	0.411087	2.43256	0.0149923	0.0845194	ENSG00000196557	CACNA1H
ENSDARG00000061099	nfasca	38.6243	0.998057	1.99731	0.500674	0.3027	3.29719	0.000976584	0.0121484	ENSG00000163531	NFASC
ENSDARG00000098226	smpd3	52.5469	0.996227	1.99478	0.501309	0.342609	2.90776	0.00364026	0.0313994	ENSG00000103056	SMPD3
ENSDARG00000004632	egln1b	82.3283	0.995914	1.99434	0.501418	0.211552	4.70767	2.50567e-06	0.000111145	ENSG00000135766	EGLN1
ENSDARG00000006797	nt5dc1	41.6686	0.994973	1.99304	0.501745	0.270816	3.67398	0.000238802	0.00415326	ENSG00000178425	NT5DC1
ENSDARG00000016598	ckmt1	1240.31	0.994342	1.99217	0.501965	0.350199	2.83936	0.0045204	0.0365347	ENSG00000237289	CKMT1B
ENSDARG00000058022	ormdl2	42.3946	0.993486	1.99099	0.502263	0.247825	4.00881	6.10251e-05	0.0014188	ENSG00000123353	ORMDL2
ENSDARG00000053241	sts	20.9841	0.993037	1.99037	0.502419	0.397243	2.49982	0.0124256	0.0748903	ENSG00000101846	STS
ENSDARG00000069832	sfxn4	19.9863	0.992756	1.98998	0.502517	0.394613	2.51577	0.0118773	0.0727345	ENSG00000183605	SFXN4
ENSDARG00000014386	galnt6	153.001	0.990505	1.98688	0.503301	0.304355	3.25444	0.00113617	0.0135907	ENSG00000139629	GALNT6
ENSDARG00000093572	lamc3	49.7324	0.987839	1.98321	0.504232	0.295154	3.34686	0.000817312	0.0106177	ENSG00000050555	LAMC3
ENSDARG00000060900	znf362a	32.8829	0.983763	1.97762	0.505659	0.284774	3.45454	0.000551241	0.00777695	ENSG00000160094	ZNF362
ENSDARG00000056842	usp30	17.164	0.983735	1.97758	0.505669	0.326447	3.01346	0.00258285	0.0245735	ENSG00000135093	USP30
ENSDARG00000053805	trub1	24.8314	0.981504	1.97452	0.506452	0.343246	2.85947	0.00424346	0.0349908	ENSG00000165832	TRUB1
ENSDARG00000100198	sncaip	64.2842	0.981466	1.97447	0.506465	0.198672	4.94014	7.80669e-07	4.37412e-05	ENSG00000064692	SNCAIP
ENSDARG00000018984	eya2	14.1027	0.979602	1.97192	0.50712	0.330916	2.96028	0.00307363	0.0279417	ENSG00000064655	EYA2
ENSDARG00000041830	tsn	125.027	0.978124	1.9699	0.507639	0.25459	3.84196	0.000122055	0.00247375	ENSG00000211460	TSN
ENSDARG00000099448	sh3d21	95.9036	0.975354	1.96612	0.508615	0.29301	3.32874	0.000872404	0.0111262	ENSG00000214193	SH3D21
ENSDARG00000016856	pon2	23.8608	0.974138	1.96447	0.509044	0.365757	2.66335	0.00773674	0.0535195	ENSG00000005421	PON1
ENSDARG00000070867	smx5	24.3437	0.973877	1.96411	0.509136	0.30541	3.18875	0.00142888	0.0159064	ENSG00000204392	LSM2
ENSDARG00000070266	spock3	20.5755	0.972769	1.9626	0.509527	0.287151	3.38766	0.000704912	0.00946135	ENSG00000196104	SPOCK3
ENSDARG00000039400	polr1c	33.6964	0.972518	1.96226	0.509616	0.30013	3.24033	0.00119393	0.0140486	ENSG00000171453	POLR1C
ENSDARG00000008239	mocs3	16.6068	0.972276	1.96193	0.509701	0.277887	3.49882	0.000467315	0.00681498	ENSG00000124217	MOCS3
ENSDARG00000071090	actn2b	22.4973	0.970802	1.95993	0.510222	0.337383	2.87745	0.00400907	0.0335782	ENSG00000077522	ACTN2
ENSDARG00000005023	fkbp9	131.949	0.96866	1.95702	0.510981	0.3592	2.69671	0.00700282	0.0498227	ENSG00000122642	FKBP9
ENSDARG00000062192	TBC1D8B	72.2423	0.967893	1.95598	0.511252	0.190757	5.07396	3.89618e-07	2.47824e-05	ENSG00000133138	TBC1D8B
ENSDARG00000088835	efs	84.3724	0.967816	1.95588	0.511279	0.234374	4.12936	3.63775e-05	0.000956836	ENSG00000100842	EFS
ENSDARG00000077399	ubash3bb	5.22879	0.966939	1.95469	0.51159	0.406202	2.38044	0.017292	0.0928497	ENSG00000154127	UBASH3B
ENSDARG00000038978	dnajb4	11.6687	0.96641	1.95397	0.511778	0.410998	2.35138	0.0187041	0.097824	ENSG00000162616	DNAJB4
ENSDARG00000012467	spint1b	72.1771	0.964626	1.95156	0.512411	0.259697	3.71443	0.000203661	0.00365199	ENSG00000166145	SPINT1
ENSDARG00000039729	asap1b	99.4383	0.961921	1.9479	0.513373	0.217989	4.4127	1.02089e-05	0.000348369	ENSG00000153317	ASAP1
ENSDARG00000088214	si:dkey-23a23.3	6.28526	0.961734	1.94765	0.513439	0.408339	2.35524	0.0185109	0.0972014
ENSDARG00000105394	gemin6	31.7896	0.961066	1.94675	0.513677	0.300658	3.19654	0.00139086	0.0156314	ENSG00000152147	GEMIN6
ENSDARG00000060631		14.3611	0.960899	1.94652	0.513737	0.385467	2.49282	0.0126734	0.0757747	ENSG00000136895	GARNL3
ENSDARG00000079167	si:ch211-230g15.5	92.6203	0.960877	1.94649	0.513744	0.243657	3.94357	8.02789e-05	0.00177825	ENSG00000173889	PHC3
ENSDARG00000101178	sh3rf2	38.1991	0.96006	1.94539	0.514036	0.311971	3.07741	0.00208811	0.021043
ENSDARG00000053831	vtnb	215.971	0.959205	1.94424	0.51434	0.394961	2.4286	0.0151571	0.0850672	ENSG00000109072	VTN
ENSDARG00000069989	bnc2	32.9424	0.958022	1.94264	0.514762	0.360913	2.65444	0.00794394	0.0545129	ENSG00000173068	BNC2
ENSDARG00000104789	zgc:158257	58.487	0.957613	1.94209	0.514908	0.269037	3.55941	0.000371689	0.00574782	ENSG00000081791	KIAA0141
ENSDARG00000067717	tomm7	43.1897	0.957204	1.94154	0.515054	0.287103	3.33401	0.000856039	0.0110007	ENSG00000196683	TOMM7
ENSDARG00000038027	nol12	98.5275	0.957146	1.94147	0.515075	0.270851	3.53384	0.000409567	0.00616545	ENSG00000273899	NOL12
ENSDARG00000003829	galnt2	109.416	0.956302	1.94033	0.515376	0.274353	3.48566	0.000490918	0.00706748	ENSG00000143641	GALNT2
ENSDARG00000078582	myo16	31.5413	0.955626	1.93942	0.515618	0.386435	2.47293	0.0134012	0.0789225	ENSG00000041515	MYO16
ENSDARG00000078908	fbxo41	5.69925	0.955583	1.93936	0.515633	0.398796	2.39617	0.0165674	0.0901005	ENSG00000163013	FBXO41
ENSDARG00000089862	si:dkey-16j16.4	19.0002	0.955076	1.93868	0.515814	0.30044	3.17893	0.0014782	0.0162852
ENSDARG00000076529	mn1a	53.0523	0.953788	1.93695	0.516275	0.309886	3.07786	0.0020849	0.0210377	ENSG00000169184	MN1
ENSDARG00000039887	c1qbp	254.29	0.952885	1.93574	0.516598	0.22778	4.18336	2.87229e-05	0.000795189	ENSG00000108561	C1QBP
ENSDARG00000006283	waslb	156.637	0.952388	1.93507	0.516777	0.219446	4.33995	1.42513e-05	0.000459014	ENSG00000106299	WASL
ENSDARG00000042336	impdh1a	11.6147	0.951932	1.93446	0.51694	0.384318	2.47694	0.0132515	0.0782364	ENSG00000106348	IMPDH1
ENSDARG00000023759	zgc:73226	9.4926	0.951921	1.93445	0.516944	0.342686	2.77783	0.00547238	0.0418653
ENSDARG00000089641	ppm1lb	7.58422	0.951088	1.93333	0.517242	0.4043	2.35243	0.0186512	0.0976595	ENSG00000163590	PPM1L
ENSDARG00000022183	gsto1	89.1163	0.95073	1.93285	0.517371	0.385216	2.46804	0.0135853	0.0795573	ENSG00000065621	GSTO2
ENSDARG00000037835	polr3k	21.3333	0.950661	1.93276	0.517395	0.338639	2.8073	0.00499583	0.0393346	ENSG00000161980	POLR3K
ENSDARG00000062418	ttl	32.6884	0.947821	1.92896	0.518415	0.228887	4.141	3.45796e-05	0.00091911	ENSG00000114999	TTL
ENSDARG00000015676	nmd3	103.803	0.946772	1.92755	0.518792	0.206516	4.5845	4.55073e-06	0.000184464	ENSG00000169251	NMD3
ENSDARG00000069116	timm10	46.9812	0.943239	1.92284	0.520064	0.302541	3.11772	0.00182255	0.0190516	ENSG00000134809	TIMM10
ENSDARG00000079891	dnajc6	37.6393	0.942203	1.92146	0.520438	0.326935	2.88193	0.00395248	0.0332679	ENSG00000116675	DNAJC6
ENSDARG00000070494	pdgfra	114.508	0.941996	1.92118	0.520512	0.222662	4.2306	2.33068e-05	0.000671548	ENSG00000282278	AC058822.1
ENSDARG00000061201	acsf2	315.582	0.94179	1.92091	0.520586	0.25094	3.75304	0.0001747	0.00328406	ENSG00000167107	ACSF2
ENSDARG00000020581	otofb	8.3858	0.941479	1.9205	0.520699	0.33942	2.77379	0.00554074	0.0421643	ENSG00000115155	OTOF
ENSDARG00000041378	sh2d4a	29.0508	0.940304	1.91893	0.521123	0.309267	3.04043	0.00236242	0.0230066	ENSG00000104611	SH2D4A
ENSDARG00000073858	pex26	14.8296	0.939212	1.91748	0.521518	0.315031	2.98133	0.00286999	0.0265438	ENSG00000215193	PEX26
ENSDARG00000060235	mst1ra	85.0573	0.937854	1.91568	0.522009	0.361975	2.59094	0.00957155	0.0623925	ENSG00000164078	MST1R
ENSDARG00000061131	kif21a	116.674	0.93716	1.91476	0.52226	0.239491	3.91313	9.11062e-05	0.00196671	ENSG00000139116	KIF21A
ENSDARG00000023111	plg	1409.15	0.93671	1.91416	0.522423	0.345181	2.71368	0.00665402	0.0479996	ENSG00000122194	PLG
ENSDARG00000037748	slc43a1b	66.4268	0.936528	1.91392	0.522489	0.331765	2.82287	0.00475963	0.0379027	ENSG00000149150	SLC43A1
ENSDARG00000020642	gtdc1	29.6112	0.936241	1.91354	0.522593	0.325943	2.8724	0.00407362	0.033989	ENSG00000121964	GTDC1
ENSDARG00000055052	map2	26.1584	0.93595	1.91315	0.522698	0.313964	2.98108	0.00287234	0.0265533	ENSG00000078018	MAP2
ENSDARG00000097630	si:ch211-282b22.1	59.356	0.935762	1.9129	0.522766	0.392082	2.38665	0.0170027	0.0917594	ENSG00000176731	C8orf59
ENSDARG00000055868	rsl1d1	222.727	0.935377	1.91239	0.522906	0.266679	3.5075	0.000452344	0.00665907	ENSG00000171490	RSL1D1
ENSDARG00000088168	ablim3	11.7978	0.934369	1.91106	0.523271	0.363039	2.57374	0.0100605	0.0648302	ENSG00000173210	ABLIM3
ENSDARG00000101010	hpdl	20.095	0.932351	1.90838	0.524004	0.336668	2.76935	0.00561687	0.0425868	ENSG00000186603	HPDL
ENSDARG00000010032	cmtm7	12.6089	0.926997	1.90131	0.525952	0.364537	2.54294	0.0109924	0.0689436	ENSG00000153551	CMTM7
ENSDARG00000031325	tmed1a	35.5032	0.926643	1.90085	0.526081	0.381369	2.42978	0.0151079	0.0848814	ENSG00000099203	TMED1
ENSDARG00000070437	rpl22	757.21	0.926168	1.90022	0.526254	0.252277	3.67123	0.000241383	0.00417304	ENSG00000116251	RPL22
ENSDARG00000077265	wdr89	17.2104	0.926124	1.90016	0.52627	0.269724	3.4336	0.000595628	0.00828595	ENSG00000140006	WDR89
ENSDARG00000098666	si:dkey-93h22.8	168.315	0.925769	1.8997	0.5264	0.165715	5.58652	2.31671e-08	2.35478e-06	ENSG00000148840	PPRC1
ENSDARG00000021664	fzd3a	17.0132	0.925761	1.89969	0.526403	0.319091	2.90125	0.0037168	0.0319506	ENSG00000104290	FZD3
ENSDARG00000032618	mgst1.1	45.4639	0.925613	1.89949	0.526457	0.374104	2.47421	0.013353	0.0787205	ENSG00000008394	MGST1
ENSDARG00000096428	si:dkey-217d24.6	113.073	0.925496	1.89934	0.5265	0.332713	2.78167	0.00540805	0.0416085	ENSG00000011451	WIZ
ENSDARG00000069313	oxa1l	87.4086	0.924608	1.89817	0.526823	0.257761	3.58708	0.0003344	0.00532173	ENSG00000155463	OXA1L
ENSDARG00000035352	pafah1b2	19.235	0.923727	1.89701	0.527146	0.346746	2.66398	0.00772212	0.0534732	ENSG00000168092	PAFAH1B2
ENSDARG00000100677	tmem205	42.2959	0.921554	1.89415	0.52794	0.258132	3.57008	0.000356866	0.00558261	ENSG00000105518	TMEM205
ENSDARG00000076330	dusp12	32.5936	0.920051	1.89218	0.52849	0.383028	2.40204	0.0163038	0.0892529	ENSG00000081721	DUSP12
ENSDARG00000002405	si:ch211-225b11.1	44.7241	0.918922	1.8907	0.528904	0.325163	2.82604	0.0047128	0.0377051
ENSDARG00000032317	tox	40.7875	0.916691	1.88778	0.529723	0.342034	2.68012	0.00735967	0.0516172	ENSG00000198846	TOX
ENSDARG00000070844	gamt	1620.87	0.916631	1.8877	0.529745	0.348206	2.63244	0.0084774	0.0571956	ENSG00000130005	GAMT
ENSDARG00000042821	agps	66.6408	0.915013	1.88559	0.530339	0.273323	3.34773	0.000814762	0.010605	ENSG00000018510	AGPS
ENSDARG00000058369	mex3b	36.6334	0.908938	1.87766	0.532577	0.307902	2.95204	0.00315683	0.0284522	ENSG00000183496	MEX3B
ENSDARG00000100560	zfpm2b	38.1285	0.906231	1.87414	0.533577	0.335516	2.70101	0.00691298	0.0492876
ENSDARG00000104485	si:ch1073-224n8.1	46.6805	0.904607	1.87204	0.534178	0.328391	2.75467	0.00587515	0.0439732
ENSDARG00000057125	pld1b	103.984	0.90447	1.87186	0.534229	0.335219	2.69815	0.00697268	0.0496607	ENSG00000075651	PLD1
ENSDARG00000086215	gpr156	7.76286	0.904077	1.87135	0.534374	0.377035	2.39786	0.0164913	0.0899107	ENSG00000175697	GPR156
ENSDARG00000054251	pqlc3	17.9033	0.903615	1.87075	0.534546	0.281414	3.21098	0.00132282	0.0151306	ENSG00000162976	PQLC3
ENSDARG00000075057	si:dkeyp-33b5.4	28.7352	0.903326	1.87037	0.534653	0.276911	3.26215	0.00110572	0.0133286	ENSG00000100890	KIAA0391
ENSDARG00000059711	nol6	148.325	0.898602	1.86426	0.536406	0.319777	2.81009	0.00495279	0.0391023	ENSG00000165271	NOL6
ENSDARG00000061784	arhgap25	26.6989	0.896552	1.86161	0.537169	0.371537	2.41309	0.0158179	0.087561	ENSG00000163219	ARHGAP25
ENSDARG00000077545	si:dkey-16p21.7	18.6585	0.896437	1.86146	0.537212	0.352633	2.54212	0.0110181	0.0690206	ENSG00000160469	BRSK1
ENSDARG00000099596	btd	30.8778	0.896315	1.86131	0.537257	0.283158	3.16542	0.00154858	0.0169101	ENSG00000169814	BTD
ENSDARG00000076518	mettl1	34.022	0.892614	1.85654	0.538637	0.289961	3.07839	0.0020812	0.0210191	ENSG00000037897	METTL1
ENSDARG00000035882	hrsp12	185.717	0.891102	1.85459	0.539202	0.30273	2.94356	0.00324466	0.0289756	ENSG00000132541	RIDA
ENSDARG00000045481	gsap	13.9507	0.889989	1.85316	0.539618	0.334202	2.66302	0.00774417	0.0535381	ENSG00000186088	GSAP
ENSDARG00000078778	lrch1	50.1158	0.887333	1.84975	0.540613	0.286874	3.09311	0.00198073	0.0203063	ENSG00000136141	LRCH1
ENSDARG00000075435	akap11	69.8862	0.887274	1.84968	0.540635	0.241649	3.67174	0.000240905	0.00417191	ENSG00000023516	AKAP11
ENSDARG00000088116	gstm.3	75.1398	0.884686	1.84636	0.541606	0.276921	3.19473	0.00139964	0.0156931	ENSG00000213366	GSTM2
ENSDARG00000104989	wnk2	15.757	0.882818	1.84397	0.542307	0.345882	2.55237	0.0106993	0.0675454	ENSG00000165238	WNK2
ENSDARG00000040179	zgc:101562	48.4676	0.881952	1.84287	0.542633	0.356687	2.47262	0.0134126	0.0789325
ENSDARG00000076564	hspg2	505.729	0.880786	1.84138	0.543072	0.239013	3.68509	0.000228621	0.00402115	ENSG00000142798	HSPG2
ENSDARG00000076025	dgkzb	28.3506	0.880713	1.84128	0.543099	0.365706	2.40825	0.0160292	0.088301	ENSG00000149091	DGKZ
ENSDARG00000030478	zgc:66484	313.085	0.880604	1.84115	0.54314	0.291615	3.01975	0.00252983	0.0242144
ENSDARG00000090914	si:ch211-117k10.3	26.8374	0.8805	1.84101	0.543179	0.258842	3.40169	0.0006697	0.00907302
ENSDARG00000073944	si:ch73-386h18.1	72.5601	0.879011	1.83911	0.54374	0.347085	2.53255	0.0113235	0.0703223
ENSDARG00000063249	mrpl9	48.8744	0.878855	1.83892	0.543799	0.242042	3.63101	0.000282316	0.00466832	ENSG00000143436	MRPL9
ENSDARG00000079323	rgmb	41.9615	0.877334	1.83698	0.544372	0.283406	3.09568	0.00196361	0.0201921	ENSG00000174136	RGMB
ENSDARG00000069432	plscr3b	116.884	0.876614	1.83606	0.544644	0.251483	3.48577	0.000490719	0.00706748	ENSG00000187838	PLSCR3
ENSDARG00000008976	mdn1	274.538	0.876175	1.8355	0.54481	0.178371	4.91208	9.0113e-07	4.89977e-05	ENSG00000112159	MDN1
ENSDARG00000043287	atg101	38.6856	0.875511	1.83466	0.545061	0.252566	3.46646	0.000527354	0.00749073	ENSG00000123395	ATG101
ENSDARG00000043608	eif4ebp1	120.53	0.87481	1.83377	0.545326	0.178007	4.91447	8.90211e-07	4.85345e-05
ENSDARG00000054749	lmo4b	31.6094	0.874474	1.83334	0.545453	0.327188	2.6727	0.00752444	0.0524274
ENSDARG00000038106	slc37a4a	79.933	0.873485	1.83208	0.545827	0.309295	2.82412	0.0047411	0.0378148	ENSG00000137700	SLC37A4
ENSDARG00000016528	wdcp	21.1628	0.873066	1.83155	0.545985	0.265466	3.2888	0.00100615	0.012418	ENSG00000163026	WDCP
ENSDARG00000062085	tkfc	91.4973	0.870943	1.82886	0.546789	0.311005	2.80041	0.00510375	0.0398893	ENSG00000149476	TKFC
ENSDARG00000025467	aatf	67.858	0.870417	1.82819	0.546989	0.292039	2.98048	0.00287794	0.026593	ENSG00000275700	AATF
ENSDARG00000053026	kif19	34.4949	0.870132	1.82783	0.547097	0.310886	2.79888	0.00512798	0.039986	ENSG00000196169	KIF19
ENSDARG00000062577	arhgap35a	293.202	0.869943	1.82759	0.547168	0.17615	4.93865	7.86661e-07	4.38481e-05
ENSDARG00000013653	adgrl4	16.2084	0.869241	1.8267	0.547435	0.355872	2.44256	0.0145833	0.0829985	ENSG00000162618	ADGRL4
ENSDARG00000074734	msl1a	46.9518	0.868886	1.82625	0.54757	0.262459	3.31055	0.000931114	0.011727	ENSG00000188895	MSL1
ENSDARG00000088036	si:dkey-106g10.7	26.9133	0.868576	1.82586	0.547687	0.237626	3.65521	0.000256967	0.00437515	ENSG00000188070	C11orf95
ENSDARG00000061865	ddx10	79.1343	0.865813	1.82237	0.548737	0.181053	4.78209	1.73485e-06	8.22759e-05	ENSG00000178105	DDX10
ENSDARG00000037378	qdprb1	18.3098	0.864256	1.8204	0.54933	0.345636	2.50048	0.0124025	0.0748182	ENSG00000151552	QDPR
ENSDARG00000089913	cacna1g	30.1119	0.864234	1.82037	0.549338	0.299237	2.88813	0.00387546	0.0329106	ENSG00000006283	CACNA1G
ENSDARG00000060018	si:ch1073-44g3.1	12.5121	0.863117	1.81896	0.549764	0.351014	2.45892	0.0139356	0.080859	ENSG00000181904	C5orf24
ENSDARG00000104516	polr3d	46.8904	0.862849	1.81863	0.549866	0.305371	2.82558	0.00471953	0.0377171	ENSG00000168495	POLR3D
ENSDARG00000009087	cd74a	434.095	0.862755	1.81851	0.549902	0.357799	2.41128	0.0158964	0.0878757	ENSG00000019582	CD74
ENSDARG00000003008	prkcea	18.5208	0.861709	1.81719	0.5503	0.330232	2.6094	0.00907009	0.0599937	ENSG00000171132	PRKCE
ENSDARG00000036863	MYO1D	246.089	0.861353	1.81674	0.550436	0.286666	3.00473	0.00265821	0.0250665	ENSG00000176658	MYO1D
ENSDARG00000077467	sox10	29.4379	0.860962	1.81625	0.550585	0.347004	2.48113	0.0130967	0.0776855	ENSG00000100146	SOX10
ENSDARG00000035618	coq5	32.322	0.860755	1.81599	0.550664	0.293037	2.93736	0.00331022	0.0293795	ENSG00000110871	COQ5
ENSDARG00000044655	st14b	83.761	0.859835	1.81483	0.551015	0.324522	2.64955	0.00806	0.0551114	ENSG00000149418	ST14
ENSDARG00000059950	plxdc2	62.7535	0.858856	1.8136	0.55139	0.341825	2.51256	0.0119859	0.0730679	ENSG00000120594	PLXDC2
ENSDARG00000036855	plagx	32.9939	0.858283	1.81288	0.551609	0.203799	4.21143	2.53763e-05	0.000717884	ENSG00000126003	PLAGL2
ENSDARG00000017595	ccdc6b	98.6853	0.857463	1.81185	0.551922	0.167718	5.11253	3.17869e-07	2.09847e-05	ENSG00000108091	CCDC6
ENSDARG00000075718	rpz5	79.4287	0.857265	1.8116	0.551998	0.321848	2.66357	0.00773159	0.0535024
ENSDARG00000037930	rnf113a	30.0839	0.857006	1.81128	0.552097	0.318467	2.69104	0.00712304	0.0503416	ENSG00000139797	RNF113B
ENSDARG00000074667	akt1s1	197.149	0.855617	1.80953	0.552629	0.148194	5.77363	7.75839e-09	8.67011e-07	ENSG00000204673	AKT1S1
ENSDARG00000099528	dus3l	120.12	0.855049	1.80882	0.552847	0.232834	3.67236	0.000240322	0.00416894	ENSG00000267157	AC011499.1
ENSDARG00000100119	caskb	26.2397	0.853758	1.8072	0.553342	0.27583	3.09523	0.00196662	0.0202026	ENSG00000147044	CASK
ENSDARG00000074575	si:ch211-269i23.2	147.649	0.85359	1.80699	0.553406	0.340115	2.50971	0.0120831	0.0734832
ENSDARG00000036628	cd74b	193.44	0.85325	1.80657	0.553537	0.308829	2.76285	0.00572986	0.043228
ENSDARG00000104945	sncb	9.03006	0.851489	1.80436	0.554212	0.346115	2.46013	0.0138885	0.0807572	ENSG00000074317	SNCB
ENSDARG00000101244	gli1	35.8594	0.851197	1.804	0.554325	0.245803	3.46292	0.00053435	0.00756883	ENSG00000111087	GLI1
ENSDARG00000007996	pou2f1b	31.863	0.850916	1.80365	0.554433	0.291303	2.92107	0.00348828	0.0304389	ENSG00000143190	POU2F1
ENSDARG00000044954	slit1a	85.781	0.850078	1.8026	0.554755	0.263417	3.22712	0.00125041	0.0144857	ENSG00000187122	SLIT1
ENSDARG00000041599	zgc:91860	25.3786	0.848885	1.80111	0.555214	0.226805	3.7428	0.000181985	0.00337647	ENSG00000135709	KIAA0513
ENSDARG00000104835	map3k4	210.416	0.847961	1.79995	0.55557	0.310807	2.72825	0.00636706	0.0465606	ENSG00000085511	MAP3K4
ENSDARG00000054537	nhsl1a	69.1944	0.847485	1.79936	0.555753	0.258444	3.27918	0.00104111	0.0127011	ENSG00000135540	NHSL1
ENSDARG00000102618	utp18	79.517	0.845893	1.79738	0.556366	0.215123	3.93213	8.41959e-05	0.00185112	ENSG00000011260	UTP18
ENSDARG00000099961	bnip3	44.4803	0.845287	1.79662	0.5566	0.348441	2.42591	0.01527	0.0853932	ENSG00000176171	BNIP3
ENSDARG00000070431	fip1l1b	152.677	0.845284	1.79662	0.556601	0.192068	4.40095	1.07777e-05	0.000362093	ENSG00000145216	FIP1L1
ENSDARG00000025875	kctd2	8.81281	0.844852	1.79608	0.556768	0.350793	2.40841	0.0160223	0.088301	ENSG00000180901	KCTD2
ENSDARG00000069287	imp3	59.429	0.844642	1.79582	0.556849	0.309855	2.72593	0.0064121	0.0468391	ENSG00000177971	IMP3
ENSDARG00000035905	slc25a44b	99.9656	0.844085	1.79513	0.557064	0.214918	3.92747	8.58441e-05	0.00187716	ENSG00000160785	SLC25A44
ENSDARG00000005823	slc39a10	137.867	0.843972	1.79498	0.557108	0.188593	4.4751	7.63743e-06	0.000276345	ENSG00000196950	SLC39A10
ENSDARG00000009553	gng3	11.483	0.843952	1.79496	0.557115	0.355196	2.37602	0.0175007	0.0935236	ENSG00000162188	GNG3
ENSDARG00000070080	nbeaa	70.1743	0.843647	1.79458	0.557233	0.329307	2.56189	0.0104106	0.0662913	ENSG00000172915	NBEA
ENSDARG00000006062	akap1b	353.91	0.843453	1.79434	0.557308	0.26093	3.23249	0.00122717	0.0143231	ENSG00000121057	AKAP1
ENSDARG00000096120	si:ch73-266f23.3	12.4514	0.842979	1.79375	0.557491	0.346183	2.43507	0.0148889	0.0842163	ENSG00000205903	ZNF316
ENSDARG00000019815	fn1a	520.658	0.84277	1.79349	0.557572	0.285254	2.95445	0.00313223	0.0283467	ENSG00000115414	FN1
ENSDARG00000045305	pde7a	101.919	0.842546	1.79321	0.557658	0.152938	5.50908	3.60724e-08	3.49108e-06	ENSG00000205268	PDE7A
ENSDARG00000060697	kmt2bb	342.194	0.842482	1.79313	0.557683	0.220119	3.8274	0.000129503	0.00259096	ENSG00000272333	KMT2B
ENSDARG00000024278	adh8b	678.152	0.842443	1.79308	0.557698	0.242299	3.47688	0.000507286	0.00726691	ENSG00000196616	ADH1B
ENSDARG00000103670	cmc1	38.2012	0.842371	1.79299	0.557726	0.283932	2.96681	0.0030091	0.0275532	ENSG00000187118	CMC1
ENSDARG00000058005	hgd	394.989	0.841023	1.79132	0.558247	0.357701	2.35119	0.0187133	0.0978324	ENSG00000113924	HGD
ENSDARG00000012555	ak5	8.15127	0.840462	1.79062	0.558465	0.354206	2.37281	0.0176535	0.0939573	ENSG00000154027	AK5
ENSDARG00000098588	gchfr	21.8888	0.839297	1.78918	0.558916	0.343683	2.44206	0.0146035	0.0830435	ENSG00000137880	GCHFR
ENSDARG00000100725	ephb4a	36.6939	0.839127	1.78897	0.558982	0.280852	2.98779	0.00281006	0.0261296	ENSG00000196411	EPHB4
ENSDARG00000039350	ssbp1	22.6073	0.839075	1.7889	0.559002	0.290324	2.89013	0.0038508	0.0327683	ENSG00000106028	SSBP1
ENSDARG00000102722	itih3b	438.804	0.837844	1.78738	0.559479	0.343461	2.43942	0.014711	0.0834128	ENSG00000055955	ITIH4
ENSDARG00000053452	pop5	19.2851	0.837125	1.78649	0.559758	0.334652	2.50148	0.0123675	0.074663	ENSG00000167272	POP5
ENSDARG00000040535		23.4922	0.83618	1.78532	0.560125	0.313999	2.663	0.00774472	0.0535381	ENSG00000147408	CSGALNACT1
ENSDARG00000071570	si:dkeyp-87e7.4	96.8898	0.835922	1.785	0.560225	0.253785	3.29382	0.000988365	0.0122423	ENSG00000177352	CCDC71
ENSDARG00000089314	mapta	22.6009	0.835524	1.78451	0.560379	0.350535	2.38357	0.0171457	0.0922355	ENSG00000186868	MAPT
ENSDARG00000026281	lyrm1	13.0495	0.835157	1.78405	0.560522	0.322272	2.59147	0.00955674	0.0623562	ENSG00000102897	LYRM1
ENSDARG00000007943	gabpb2a	99.3384	0.835067	1.78394	0.560557	0.243828	3.42482	0.000615206	0.0084901	ENSG00000143458	GABPB2
ENSDARG00000087205	akt3b	18.7531	0.834824	1.78364	0.560651	0.25129	3.32216	0.000893231	0.0113417	ENSG00000117020	AKT3
ENSDARG00000061741	itpr3	123.049	0.834797	1.78361	0.560662	0.216362	3.85833	0.000114164	0.0023396	ENSG00000096433	ITPR3
ENSDARG00000075974	si:dkey-258f14.3	37.3712	0.834705	1.78349	0.560698	0.290701	2.87135	0.00408722	0.0340635
ENSDARG00000006202	erbb3a	98.3051	0.834548	1.7833	0.560759	0.350209	2.383	0.0171724	0.0923548	ENSG00000065361	ERBB3
ENSDARG00000099954	plekhm1	124.033	0.833986	1.7826	0.560977	0.277543	3.00489	0.00265676	0.0250645	ENSG00000225190	PLEKHM1
ENSDARG00000090386	cd3eap	51.7179	0.832554	1.78084	0.561534	0.293892	2.83285	0.00461345	0.0370597	ENSG00000117877	CD3EAP
ENSDARG00000073841	herc2	628.522	0.83157	1.77962	0.561917	0.198173	4.19618	2.71453e-05	0.000760482	ENSG00000128731	HERC2
ENSDARG00000090544	CABZ01085657.1	36.3455	0.831388	1.7794	0.561988	0.313204	2.65446	0.00794348	0.0545129
ENSDARG00000100409	camlg	52.399	0.826817	1.77377	0.563772	0.241443	3.42449	0.000615955	0.00849279	ENSG00000164615	CAMLG
ENSDARG00000031888	mapk8a	17.3755	0.82664	1.77355	0.563841	0.273055	3.02737	0.00246691	0.0238291	ENSG00000107643	MAPK8
ENSDARG00000102914	dennd4b	98.8183	0.826458	1.77333	0.563912	0.264159	3.12864	0.00175619	0.0185399	ENSG00000198837	DENND4B
ENSDARG00000045913	mrps10	46.1219	0.826393	1.77325	0.563937	0.271661	3.042	0.00235013	0.0229421	ENSG00000048544	MRPS10
ENSDARG00000074225	si:ch211-269e2.1	50.0401	0.82635	1.77319	0.563954	0.171418	4.82067	1.43077e-06	7.12542e-05
ENSDARG00000059363	tgfbr2a	29.9177	0.82618	1.77298	0.564021	0.321884	2.5667	0.0102672	0.0656158	ENSG00000163513	TGFBR2
ENSDARG00000063417	erf	176.967	0.824294	1.77067	0.564758	0.190508	4.32681	1.51281e-05	0.000482644
ENSDARG00000022891	zgc:175214	72.6865	0.823016	1.7691	0.565259	0.319357	2.57711	0.00996313	0.0643847
ENSDARG00000079104	mfhas1	55.8441	0.822352	1.76829	0.565519	0.227772	3.61041	0.000305716	0.00496344	ENSG00000147324	MFHAS1
ENSDARG00000057583	prrc2c	594.093	0.821398	1.76712	0.565893	0.212809	3.85979	0.000113484	0.00232804	ENSG00000117523	PRRC2C
ENSDARG00000029252	ssb	147.112	0.82068	1.76624	0.566175	0.166578	4.92671	8.36251e-07	4.61672e-05	ENSG00000138385	SSB
ENSDARG00000028937	taf1b	31.1281	0.820113	1.76554	0.566397	0.263091	3.11723	0.0018256	0.0190734	ENSG00000115750	TAF1B
ENSDARG00000010862	amt	164.623	0.820002	1.76541	0.566441	0.266171	3.08073	0.00206492	0.0209134	ENSG00000145020	AMT
ENSDARG00000018073	mrps22	73.6643	0.819977	1.76538	0.566451	0.248311	3.30222	0.000959241	0.0119775	ENSG00000175110	MRPS22
ENSDARG00000087394	tshz3a	33.3291	0.817247	1.76204	0.567524	0.308743	2.64701	0.00812062	0.0553983
ENSDARG00000030949	srprb	100.593	0.815653	1.76009	0.568151	0.244469	3.33643	0.00084862	0.0109192	ENSG00000144867	SRPRB
ENSDARG00000068157	ehmt1a	74.8146	0.812573	1.75634	0.569365	0.299743	2.7109	0.00671002	0.0482487
ENSDARG00000016307	mrpl46	43.1709	0.81177	1.75536	0.569682	0.267903	3.03009	0.00244484	0.0236725	ENSG00000259494	MRPL46
ENSDARG00000105271	SEPT4	26.6692	0.810782	1.75416	0.570073	0.293414	2.76327	0.00572252	0.0431901	ENSG00000108387	SEPT4
ENSDARG00000007975	fth1b	52.1038	0.809943	1.75314	0.570404	0.296736	2.72951	0.0063429	0.0465016	ENSG00000181867	FTMT
ENSDARG00000077607	dus2	68.9223	0.80991	1.7531	0.570417	0.304343	2.66118	0.0077868	0.0537372	ENSG00000167264	DUS2
ENSDARG00000079257	gemin5	99.7245	0.809696	1.75284	0.570502	0.340694	2.37661	0.0174726	0.0934277	ENSG00000082516	GEMIN5
ENSDARG00000058824	mrpl4	72.6509	0.808373	1.75124	0.571026	0.218909	3.69274	0.000221854	0.00392258	ENSG00000105364	MRPL4
ENSDARG00000070174		189.625	0.807897	1.75066	0.571214	0.225429	3.58382	0.000338605	0.00537595	ENSG00000068137	PLEKHH3
ENSDARG00000042900	gtpbp1l	132.624	0.807682	1.7504	0.571299	0.202657	3.98546	6.73481e-05	0.00154101	ENSG00000100226	GTPBP1
ENSDARG00000060016	nsd1a	133.887	0.807103	1.74969	0.571528	0.213394	3.78222	0.000155438	0.00297731	ENSG00000165671	NSD1
ENSDARG00000075129	mrps11	77.0412	0.806829	1.74936	0.571637	0.255114	3.16262	0.00156355	0.0170023	ENSG00000181991	MRPS11
ENSDARG00000000324	dcaf8	116.429	0.806687	1.74919	0.571693	0.148539	5.4308	5.61008e-08	5.08857e-06	ENSG00000226372	DCAF8L1
ENSDARG00000054222	fbxl8	79.5391	0.806621	1.74911	0.571719	0.316166	2.55126	0.0107335	0.0677397	ENSG00000135722	FBXL8
ENSDARG00000104582	zgc:77058	31.2558	0.806479	1.74894	0.571776	0.299781	2.69022	0.00714042	0.0504292	ENSG00000181904	C5orf24
ENSDARG00000086789	bahd1	59.5316	0.806062	1.74843	0.571941	0.223263	3.61038	0.000305752	0.00496344	ENSG00000140320	BAHD1
ENSDARG00000010673	trim16	50.3941	0.8059	1.74824	0.572005	0.301377	2.67406	0.00749386	0.0522684	ENSG00000108448	TRIM16L
ENSDARG00000103129	nid1b	111.711	0.804574	1.74663	0.572531	0.226435	3.55322	0.00038055	0.00584464	ENSG00000116962	NID1
ENSDARG00000075821	plxnb1a	83.9705	0.80395	1.74587	0.572779	0.190896	4.21146	2.5372e-05	0.000717884	ENSG00000164050	PLXNB1
ENSDARG00000100354	si:ch73-42p12.2	34.1182	0.803855	1.74576	0.572816	0.265886	3.02331	0.00250027	0.0240923
ENSDARG00000030038	grcc10	37.9226	0.802652	1.7443	0.573294	0.222788	3.60276	0.000314852	0.00507856	ENSG00000111678	C12orf57
ENSDARG00000031299	dhrs11b	214.194	0.800846	1.74212	0.574013	0.330312	2.42452	0.0153288	0.0856174
ENSDARG00000021389	jag2b	98.5954	0.798788	1.73964	0.574832	0.213226	3.7462	0.000179533	0.00334385	ENSG00000184916	JAG2
ENSDARG00000101999	cog3	95.4914	0.798014	1.73871	0.57514	0.166743	4.78589	1.70228e-06	8.12078e-05	ENSG00000136152	COG3
ENSDARG00000099755	pfklb	135.907	0.797826	1.73848	0.575215	0.209199	3.81371	0.000136896	0.00270146	ENSG00000141959	PFKL
ENSDARG00000035357	gnb2	57.1587	0.797455	1.73803	0.575363	0.212137	3.75916	0.000170488	0.00322587	ENSG00000172354	GNB2
ENSDARG00000029242	fbxo3	37.5979	0.797377	1.73794	0.575394	0.176622	4.5146	6.34359e-06	0.000242098	ENSG00000110429	FBXO3
ENSDARG00000026165	col11a1a	303.198	0.797071	1.73757	0.575517	0.310621	2.56606	0.0102862	0.0656956
ENSDARG00000003769	tada2b	48.9176	0.795489	1.73567	0.576148	0.202327	3.9317	8.4346e-05	0.00185241	ENSG00000173011	TADA2B
ENSDARG00000070408	ccnd2b	32.5382	0.794775	1.73481	0.576433	0.244274	3.25362	0.00113944	0.0136054	ENSG00000118971	CCND2
ENSDARG00000056233		52.0613	0.794673	1.73468	0.576474	0.268148	2.96357	0.00304096	0.0277821	ENSG00000185475	TMEM179B
ENSDARG00000098954	stard13b	33.7968	0.793605	1.7334	0.576901	0.288328	2.75243	0.00591542	0.0441844	ENSG00000133121	STARD13
ENSDARG00000069594	kif13a	61.0741	0.793503	1.73328	0.576942	0.252355	3.14439	0.00166433	0.0178307	ENSG00000137177	KIF13A
ENSDARG00000100275	CU639413.1	63.7839	0.793435	1.7332	0.576969	0.290278	2.73336	0.0062691	0.0460942	ENSG00000123609	NMI
ENSDARG00000087782	rnf152	12.8175	0.79322	1.73294	0.577055	0.316765	2.50413	0.0122754	0.0743619	ENSG00000176641	RNF152
ENSDARG00000062025	cpox	115.471	0.79321	1.73293	0.577059	0.285465	2.77866	0.00545835	0.0417888	ENSG00000080819	CPOX
ENSDARG00000003213	naa15a	305.368	0.793147	1.73285	0.577084	0.165325	4.79749	1.60665e-06	7.75602e-05	ENSG00000164134	NAA15
ENSDARG00000077499	plekho1b	30.1637	0.792347	1.73189	0.577404	0.323779	2.44719	0.0143977	0.0823125	ENSG00000023902	PLEKHO1
ENSDARG00000007198	mta1	49.6815	0.789828	1.72887	0.578413	0.321604	2.4559	0.0140531	0.0811456	ENSG00000182979	MTA1
ENSDARG00000078894	hemk1	29.799	0.788454	1.72722	0.578964	0.3253	2.42377	0.0153602	0.0856905	ENSG00000114735	HEMK1
ENSDARG00000012674	rpusd4	28.7346	0.787115	1.72562	0.579502	0.30121	2.61317	0.00897054	0.0594324	ENSG00000165526	RPUSD4
ENSDARG00000043666	abt1	66.3747	0.786856	1.72531	0.579606	0.312878	2.5149	0.0119067	0.0728483	ENSG00000146109	ABT1
ENSDARG00000029071	creld2	52.9263	0.786355	1.72471	0.579807	0.290009	2.71149	0.00669821	0.0482152	ENSG00000184164	CRELD2
ENSDARG00000007744	tsr1	185.773	0.786037	1.72433	0.579935	0.186552	4.21351	2.51435e-05	0.000714177	ENSG00000167721	TSR1
ENSDARG00000101208	FO704710.3	16.6222	0.786	1.72429	0.57995	0.239176	3.28628	0.00101521	0.0124632
ENSDARG00000104869	SPATA5	19.0184	0.785873	1.72414	0.580001	0.32381	2.42696	0.0152259	0.0852453	ENSG00000145375	SPATA5
ENSDARG00000035970	ptprn2	7.21255	0.785501	1.72369	0.58015	0.320006	2.45465	0.0141023	0.0813365	ENSG00000155093	PTPRN2
ENSDARG00000003475	sult1st5	21.8383	0.785385	1.72355	0.580197	0.321965	2.43935	0.0147138	0.0834128	ENSG00000196228	SULT1C3
ENSDARG00000010434	clu	86.1902	0.785006	1.7231	0.580349	0.303878	2.5833	0.00978608	0.0634229	ENSG00000120885	CLU
ENSDARG00000098899	zmp:0000001082	50.2614	0.78445	1.72244	0.580573	0.312166	2.51292	0.0119735	0.0730499	ENSG00000005844	ITGAL
ENSDARG00000102353	ddx47	63.2721	0.784384	1.72236	0.5806	0.244986	3.20175	0.00136593	0.015461	ENSG00000213782	DDX47
ENSDARG00000099373	zgc:158320	14.4411	0.784276	1.72223	0.580643	0.284329	2.75834	0.0058096	0.0435871
ENSDARG00000098935	bxdc2	102.37	0.783037	1.72075	0.581142	0.261131	2.99864	0.00271187	0.0253396	ENSG00000113460	BRIX1
ENSDARG00000015566	dnmt3ab	79.3279	0.782548	1.72017	0.581339	0.280888	2.78598	0.00533665	0.0412035	ENSG00000119772	DNMT3A
ENSDARG00000101259	hgh1	43.9039	0.781325	1.71871	0.581832	0.230173	3.39451	0.000687519	0.00925246	ENSG00000235173	HGH1
ENSDARG00000089076	gphna	48.886	0.781018	1.71834	0.581956	0.233311	3.34754	0.00081533	0.0106056	ENSG00000171723	GPHN
ENSDARG00000098936	kif5aa	32.5259	0.780801	1.71808	0.582043	0.30965	2.52156	0.0116836	0.0717655	ENSG00000155980	KIF5A
ENSDARG00000011863	ptk7a	180.87	0.779921	1.71704	0.582399	0.322346	2.41951	0.0155413	0.0863912	ENSG00000112655	PTK7
ENSDARG00000094965	nfil3-5	39.8357	0.779832	1.71693	0.582435	0.307724	2.53419	0.0112707	0.0701281
ENSDARG00000058328	lsm7	65.9063	0.779827	1.71692	0.582437	0.265296	2.93946	0.00328781	0.029247	ENSG00000130332	LSM7
ENSDARG00000028542	si:ch211-114c12.2	154.562	0.779466	1.7165	0.582582	0.181313	4.29901	1.71564e-05	0.000532242
ENSDARG00000037109	pwp2h	148.347	0.776868	1.71341	0.583632	0.218366	3.55764	0.000374207	0.00577352	ENSG00000275464	FP565260.1
ENSDARG00000077842	ajuba	88.1487	0.775909	1.71227	0.58402	0.294991	2.63028	0.00853138	0.0573875	ENSG00000129474	AJUBA
ENSDARG00000017128	myofl	90.0601	0.774458	1.71055	0.584608	0.318746	2.4297	0.0151114	0.0848814	ENSG00000138119	MYOF
ENSDARG00000069951	eef1a1b	22.2707	0.773775	1.70974	0.584885	0.329989	2.34485	0.0190346	0.0991281	ENSG00000156508	EEF1A1
ENSDARG00000005791	rpl28	1076.71	0.77377	1.70973	0.584887	0.239456	3.23137	0.00123199	0.0143546	ENSG00000108107	RPL28
ENSDARG00000037708	exosc10	182.047	0.773652	1.70959	0.584935	0.239197	3.23437	0.0012191	0.0142371	ENSG00000171824	EXOSC10
ENSDARG00000016889	eif3g	313.209	0.773017	1.70884	0.585192	0.203945	3.79032	0.000150452	0.00290937	ENSG00000130811	EIF3G
ENSDARG00000013741	lancl1	33.2308	0.771654	1.70723	0.585745	0.221185	3.48873	0.000485315	0.00701677	ENSG00000115365	LANCL1
ENSDARG00000078214	mybbp1a	260.416	0.771433	1.70696	0.585835	0.155891	4.94854	7.47736e-07	4.28455e-05	ENSG00000132382	MYBBP1A
ENSDARG00000008852	elp4	24.1803	0.770155	1.70545	0.586355	0.26936	2.8592	0.00424704	0.0350061	ENSG00000109911	ELP4
ENSDARG00000044203	sumf1	30.9042	0.769309	1.70445	0.586698	0.306636	2.50886	0.012112	0.0736149	ENSG00000144455	SUMF1
ENSDARG00000069708	cdc34a	90.9618	0.769002	1.70409	0.586823	0.303906	2.5304	0.0113934	0.0705844
ENSDARG00000075021	fam120a	444.166	0.768772	1.70382	0.586917	0.168992	4.54915	5.38618e-06	0.00021362	ENSG00000048828	FAM120A
ENSDARG00000101018	ptdss2	84.4793	0.768692	1.70372	0.586949	0.313198	2.45433	0.0141147	0.0813444	ENSG00000174915	PTDSS2
ENSDARG00000014907	htra1b	89.4317	0.767266	1.70204	0.58753	0.255245	3.006	0.00264711	0.0250201	ENSG00000166033	HTRA1
ENSDARG00000074270	si:ch211-214e3.5	59.4122	0.767036	1.70177	0.587623	0.265723	2.88661	0.00389423	0.0329713	ENSG00000177853	ZNF518A
ENSDARG00000097863	si:dkeyp-84f3.9	32.1574	0.766972	1.70169	0.58765	0.314166	2.44129	0.0146348	0.0831111
ENSDARG00000004114	tti1	19.7029	0.766495	1.70113	0.587844	0.235624	3.25304	0.00114176	0.0136169	ENSG00000101407	TTI1
ENSDARG00000045785	zgc:103499	42.3618	0.765044	1.69942	0.588435	0.260508	2.93674	0.00331686	0.0294126	ENSG00000133641	C12orf29
ENSDARG00000104248	muc5a	20.5251	0.764614	1.69891	0.588611	0.322187	2.3732	0.0176348	0.0939381	ENSG00000117983	MUC5B
ENSDARG00000043285	zbtb21	48.6343	0.762614	1.69656	0.589427	0.216768	3.51811	0.000434631	0.00644523	ENSG00000173276	ZBTB21
ENSDARG00000003421	igf2bp2a	46.1488	0.759886	1.69336	0.590543	0.268806	2.82689	0.0047002	0.037637	ENSG00000073792	IGF2BP2
ENSDARG00000042977	nfil3	26.2864	0.758971	1.69228	0.590917	0.295028	2.57254	0.0100956	0.0650332	ENSG00000165030	NFIL3
ENSDARG00000027611	cavin2a	93.7728	0.758893	1.69219	0.590949	0.251317	3.01967	0.00253052	0.0242144	ENSG00000168497	CAVIN2
ENSDARG00000060705	nsd1b	35.8342	0.758715	1.69198	0.591022	0.310666	2.44222	0.0145973	0.0830435	ENSG00000165671	NSD1
ENSDARG00000053857	ccdc187	55.2991	0.757881	1.691	0.591364	0.322824	2.34766	0.0188916	0.0985865
ENSDARG00000071271		16.7011	0.757578	1.69065	0.591488	0.300846	2.51816	0.0117969	0.0723295	ENSG00000168061	SAC3D1
ENSDARG00000077361	bptf	337.468	0.755814	1.68858	0.592212	0.154257	4.89971	9.59789e-07	5.10885e-05	ENSG00000171634	BPTF
ENSDARG00000006316	rpl23a	1659.31	0.755689	1.68844	0.592263	0.220655	3.42476	0.00061534	0.0084901	ENSG00000198242	RPL23A
ENSDARG00000007217	wdr55	41.7275	0.75567	1.68842	0.592271	0.303039	2.49364	0.0126442	0.0756736	ENSG00000120314	WDR55
ENSDARG00000038901	tmem256	17.0534	0.753703	1.68612	0.593079	0.314799	2.39424	0.016655	0.0903894	ENSG00000262481	TMEM256-PLSCR3
ENSDARG00000034160	slc4a1ap	82.0161	0.753703	1.68611	0.593079	0.159947	4.7122	2.45057e-06	0.000109663	ENSG00000163798	SLC4A1AP
ENSDARG00000038667	fggy	36.6149	0.753619	1.68602	0.593114	0.306199	2.46121	0.0138471	0.0805768	ENSG00000172456	FGGY
ENSDARG00000037154	hivep3b	78.2829	0.753352	1.68571	0.593223	0.226935	3.31968	0.000901201	0.0114214	ENSG00000127124	HIVEP3
ENSDARG00000103658	hivep1	148.191	0.752023	1.68415	0.59377	0.22484	3.3447	0.000823718	0.0106792	ENSG00000124203	ZNF831
ENSDARG00000006052	malt2	26.5325	0.751727	1.68381	0.593892	0.320737	2.34375	0.0190912	0.0993202
ENSDARG00000004517	ppat	103.921	0.751409	1.68344	0.594023	0.255398	2.94211	0.0032598	0.0290467	ENSG00000128059	PPAT
ENSDARG00000087779	pum3	132.306	0.749631	1.68136	0.594756	0.300861	2.49162	0.0127162	0.0759846	ENSG00000080608	PUM3
ENSDARG00000076119	emid1	46.0153	0.749519	1.68123	0.594802	0.311686	2.40473	0.0161845	0.0888118	ENSG00000186998	EMID1
ENSDARG00000094602	si:dkey-7n6.2	14.2412	0.749116	1.68076	0.594968	0.31163	2.40387	0.0162226	0.0889015
ENSDARG00000079900	shroom4	143.52	0.748091	1.67957	0.595391	0.178662	4.18719	2.82429e-05	0.000789045	ENSG00000138771	SHROOM3
ENSDARG00000062823	pi4kab	32.9333	0.74761	1.67901	0.59559	0.282558	2.64586	0.00814839	0.0554764	ENSG00000241973	PI4KA
ENSDARG00000004034	arhgdig	302.205	0.746822	1.67809	0.595915	0.269907	2.76696	0.00565817	0.0428002	ENSG00000111348	ARHGDIB
ENSDARG00000070843	arid3a	69.821	0.74653	1.67775	0.596035	0.263582	2.83225	0.0046221	0.0370703	ENSG00000116017	ARID3A
ENSDARG00000062801	erfl3	114.808	0.746446	1.67765	0.59607	0.266449	2.80146	0.00508722	0.0397949
ENSDARG00000011079	wdr3	172.336	0.746406	1.67761	0.596087	0.144338	5.17123	2.32559e-07	1.65348e-05	ENSG00000065183	WDR3
ENSDARG00000014138	acot8	23.4392	0.744172	1.67501	0.59701	0.315606	2.35791	0.0183781	0.0966798	ENSG00000101473	ACOT8
ENSDARG00000031774	pus7	68.5905	0.743938	1.67474	0.597107	0.240836	3.08898	0.00200844	0.0204968	ENSG00000091127	PUS7
ENSDARG00000105117	sdad1	148.656	0.743415	1.67413	0.597324	0.264925	2.80613	0.00501402	0.0394012	ENSG00000198301	SDAD1
ENSDARG00000062621	satb1b	17.9961	0.743369	1.67408	0.597343	0.288287	2.57857	0.00992089	0.0641732	ENSG00000182568	SATB1
ENSDARG00000061478	igf2bp1	133.407	0.743201	1.67389	0.597412	0.265444	2.79985	0.00511269	0.0399438	ENSG00000159217	IGF2BP1
ENSDARG00000030933	ksr1b	73.2912	0.742794	1.67341	0.597581	0.288968	2.57051	0.010155	0.0651927	ENSG00000141068	KSR1
ENSDARG00000012389	adar	250.968	0.741612	1.67204	0.598071	0.228721	3.24244	0.00118512	0.0139857	ENSG00000160710	ADAR
ENSDARG00000021681	asrgl1	42.9248	0.741026	1.67136	0.598314	0.199308	3.718	0.000200806	0.00360399	ENSG00000162174	ASRGL1
ENSDARG00000038826	jph1b	646.993	0.739518	1.66962	0.598939	0.283472	2.60879	0.00908626	0.060081	ENSG00000104369	JPH1
ENSDARG00000041140	ddb2	118.076	0.738281	1.66819	0.599453	0.230711	3.20002	0.00137418	0.0155109	ENSG00000134574	DDB2
ENSDARG00000077264	wdr43	297.683	0.738075	1.66795	0.599539	0.195051	3.78402	0.000154318	0.00295866	ENSG00000163811	WDR43
ENSDARG00000076334	mrpl43	63.5108	0.737274	1.66702	0.599872	0.286791	2.57077	0.0101473	0.0651927	ENSG00000055950	MRPL43
ENSDARG00000033437	rps6ka1	129.938	0.735433	1.6649	0.600638	0.221644	3.31808	0.00090637	0.0114797	ENSG00000117676	RPS6KA1
ENSDARG00000001754	noc2l	134.789	0.733911	1.66314	0.601272	0.282314	2.59963	0.00933251	0.0613005	ENSG00000188976	NOC2L
ENSDARG00000056713	pskh1	50.1895	0.733902	1.66313	0.601275	0.274683	2.67181	0.00754429	0.0525296	ENSG00000159792	PSKH1
ENSDARG00000042094	eef2a.1	118.482	0.733507	1.66268	0.60144	0.218242	3.36098	0.00077666	0.0102476
ENSDARG00000058102	sardh	97.7777	0.73256	1.66159	0.601835	0.220886	3.31646	0.000911651	0.011525	ENSG00000123453	SARDH
ENSDARG00000100553	lsm14ab	328.167	0.732209	1.66118	0.601982	0.14679	4.98814	6.09631e-07	3.61613e-05	ENSG00000257103	LSM14A
ENSDARG00000094646	dyrk2	106.627	0.731999	1.66094	0.602069	0.238334	3.07131	0.00213122	0.0213171	ENSG00000127334	DYRK2
ENSDARG00000077400	rbm10	73.4718	0.731998	1.66094	0.60207	0.185699	3.94186	8.08522e-05	0.00178537	ENSG00000182872	RBM10
ENSDARG00000005754	ptprfb	464.631	0.731918	1.66085	0.602103	0.250937	2.91674	0.00353714	0.0307063	ENSG00000142949	PTPRF
ENSDARG00000054259	nat10	140.068	0.729665	1.65825	0.603044	0.211223	3.45448	0.000551349	0.00777695	ENSG00000135372	NAT10
ENSDARG00000007912	si:ch211-196i2.1	20.1463	0.729364	1.65791	0.60317	0.243446	2.996	0.00273547	0.0254861
ENSDARG00000076001	pip5k1ca	17.9043	0.729309	1.65785	0.603193	0.233164	3.12788	0.00176071	0.0185586	ENSG00000186111	PIP5K1C
ENSDARG00000008322	ambra1a	93.3564	0.729074	1.65757	0.603291	0.200777	3.63127	0.000282035	0.00466832	ENSG00000110497	AMBRA1
ENSDARG00000101859	MNT (1 of many)	105.505	0.728737	1.65719	0.603432	0.207022	3.5201	0.000431391	0.00641128	ENSG00000070444	MNT
ENSDARG00000060127	adamts3	19.3196	0.728572	1.657	0.603501	0.302482	2.40865	0.0160117	0.088301	ENSG00000156140	ADAMTS3
ENSDARG00000101139	agpat2	323.973	0.727393	1.65564	0.603994	0.289149	2.51564	0.0118817	0.0727397	ENSG00000169692	AGPAT2
ENSDARG00000075707	nid2a	103.792	0.727258	1.65549	0.604051	0.232635	3.12617	0.00177098	0.0186183	ENSG00000087303	NID2
ENSDARG00000078904	brd4	310.385	0.727245	1.65547	0.604056	0.221136	3.28868	0.00100659	0.012418	ENSG00000141867	BRD4
ENSDARG00000021370	actr6	47.44	0.726941	1.65513	0.604184	0.251742	2.88764	0.0038814	0.0329371	ENSG00000075089	ACTR6
ENSDARG00000041607	eif4ebp3l	143.04	0.726223	1.6543	0.604484	0.297606	2.44022	0.0146785	0.0832823	ENSG00000243056	EIF4EBP3
ENSDARG00000009436	ubxn7	79.9039	0.725923	1.65396	0.60461	0.252732	2.8723	0.00407492	0.033989	ENSG00000163960	UBXN7
ENSDARG00000076673		394.134	0.725625	1.65362	0.604735	0.245796	2.95215	0.0031557	0.0284522	ENSG00000096696	DSP
ENSDARG00000008032	sart3	276.513	0.725086	1.653	0.604961	0.292273	2.48085	0.0131069	0.077723	ENSG00000075856	SART3
ENSDARG00000039374	apool	127.115	0.723679	1.65139	0.605551	0.212344	3.40805	0.000654289	0.008918	ENSG00000155008	APOOL
ENSDARG00000103388	znf609a	217.227	0.723351	1.65101	0.605689	0.215368	3.35868	0.000783165	0.0103132	ENSG00000180357	ZNF609
ENSDARG00000061294	arhgap5	261.757	0.722868	1.65046	0.605892	0.19062	3.79219	0.000149325	0.00289236	ENSG00000100852	ARHGAP5
ENSDARG00000007818	palm1b	79.3104	0.722004	1.64947	0.606255	0.301168	2.39735	0.0165142	0.0899871	ENSG00000099864	PALM
ENSDARG00000007597	bloc1s4	16.0943	0.72176	1.64919	0.606357	0.242961	2.97068	0.00297138	0.0272695	ENSG00000186222	BLOC1S4
ENSDARG00000038312	rcl1	66.5824	0.72108	1.64842	0.606643	0.234788	3.0712	0.00213202	0.0213171	ENSG00000120158	RCL1
ENSDARG00000076923	kazna	44.4154	0.720539	1.6478	0.606871	0.264945	2.71958	0.00653645	0.0474562	ENSG00000189337	KAZN
ENSDARG00000014692	znf622	152.769	0.719677	1.64681	0.607233	0.145018	4.96269	6.9525e-07	4.02946e-05	ENSG00000173545	ZNF622
ENSDARG00000075140	si:dkey-19b23.15	21.5086	0.718367	1.64532	0.607785	0.289972	2.47737	0.0132355	0.0782103
ENSDARG00000094792	twf2a	92.3175	0.718113	1.64503	0.607892	0.299301	2.3993	0.0164264	0.0896056	ENSG00000164091	WDR82
ENSDARG00000046072	snx16	24.8739	0.715409	1.64195	0.609033	0.301023	2.37659	0.0174735	0.0934277	ENSG00000104497	SNX16
ENSDARG00000078578	fam222bb	188.231	0.714589	1.64102	0.609379	0.230633	3.09839	0.00194576	0.0200467	ENSG00000173065	FAM222B
ENSDARG00000024940	rnf144b	31.3757	0.713428	1.6397	0.609869	0.263466	2.70786	0.00677195	0.0486076	ENSG00000137393	RNF144B
ENSDARG00000044404	pars2	34.5208	0.713172	1.6394	0.609978	0.274445	2.59859	0.00936065	0.061334	ENSG00000162396	PARS2
ENSDARG00000031819	eif4ebp2	808.607	0.712596	1.63875	0.610221	0.145329	4.90333	9.42234e-07	5.06877e-05	ENSG00000148730	EIF4EBP2
ENSDARG00000054063	arpc4	98.2589	0.71245	1.63858	0.610283	0.225316	3.162	0.00156687	0.017021	ENSG00000241553	ARPC4
ENSDARG00000026986	rexo1	57.953	0.711025	1.63697	0.610886	0.229702	3.09542	0.00196531	0.0201994	ENSG00000079313	REXO1
ENSDARG00000000837	snx9a	77.9651	0.709455	1.63519	0.611551	0.288892	2.45578	0.014058	0.0811506	ENSG00000130340	SNX9
ENSDARG00000102403	cry2	117.933	0.709157	1.63485	0.611677	0.183846	3.85735	0.000114623	0.00234664	ENSG00000121671	CRY2
ENSDARG00000009133	myo1eb	109.613	0.708835	1.63448	0.611814	0.255997	2.76892	0.00562424	0.0426073
ENSDARG00000056026	tprg1	58.9365	0.706976	1.63238	0.612603	0.25258	2.79902	0.00512586	0.0399849	ENSG00000188001	TPRG1
ENSDARG00000090895	kansl1a	232.296	0.706864	1.63225	0.61265	0.22985	3.07533	0.0021027	0.0211283	ENSG00000120071	KANSL1
ENSDARG00000098932	gigyf1a	83.7225	0.706307	1.63162	0.612887	0.238839	2.95725	0.00310394	0.0281745	ENSG00000146830	GIGYF1
ENSDARG00000053087	mthfr	163.96	0.703971	1.62898	0.61388	0.284201	2.47702	0.0132484	0.0782364	ENSG00000177000	MTHFR
ENSDARG00000035326	nccrp1	147.466	0.702689	1.62753	0.614426	0.247853	2.8351	0.0045811	0.0368559	ENSG00000188505	NCCRP1
ENSDARG00000012194	scp2a	980.935	0.702169	1.62695	0.614648	0.209505	3.35156	0.000803584	0.0105124	ENSG00000116171	SCP2
ENSDARG00000007923	ptpn1	137.662	0.702003	1.62676	0.614718	0.146426	4.79426	1.63275e-06	7.84454e-05	ENSG00000196396	PTPN1
ENSDARG00000025902	plekhg5a	117.19	0.700772	1.62537	0.615243	0.278795	2.51358	0.0119514	0.0729895	ENSG00000171680	PLEKHG5
ENSDARG00000003564	dohh	80.4495	0.699771	1.62425	0.61567	0.232138	3.01446	0.00257439	0.0245282	ENSG00000129932	DOHH
ENSDARG00000059581	mbd5	64.2521	0.698771	1.62312	0.616097	0.294465	2.37302	0.0176433	0.0939381	ENSG00000204406	MBD5
ENSDARG00000080009	bahcc1b	109.224	0.696176	1.6202	0.617206	0.220092	3.16311	0.00156092	0.0169837	ENSG00000266074	BAHCC1
ENSDARG00000069422	nhp2	104.594	0.695491	1.61944	0.617499	0.28716	2.42196	0.015437	0.0859704	ENSG00000145912	NHP2
ENSDARG00000045304	mtfr1	45.3111	0.695249	1.61916	0.617603	0.236828	2.93567	0.00332824	0.0294727	ENSG00000066855	MTFR1
ENSDARG00000060320	dcaf5	92.813	0.694964	1.61884	0.617725	0.206366	3.36763	0.000758165	0.0100626	ENSG00000139990	DCAF5
ENSDARG00000093235	TST	82.5201	0.694578	1.61841	0.61789	0.244128	2.84513	0.00443929	0.0361052	ENSG00000128309	MPST
ENSDARG00000029905	phyhd1	143.353	0.694536	1.61836	0.617908	0.258657	2.68517	0.00724938	0.0509143	ENSG00000175287	PHYHD1
ENSDARG00000014113	wasla	114.494	0.694236	1.61803	0.618037	0.192492	3.60657	0.000310277	0.00501676	ENSG00000106299	WASL
ENSDARG00000008490	ltv1	126.142	0.694099	1.61787	0.618095	0.169956	4.08399	4.42695e-05	0.00110599	ENSG00000135521	LTV1
ENSDARG00000004415	tcf7l2	75.3225	0.693091	1.61674	0.618527	0.262864	2.6367	0.0083718	0.0567481	ENSG00000148737	TCF7L2
ENSDARG00000105098	dr1	81.9209	0.69233	1.61589	0.618854	0.252218	2.74496	0.00605183	0.044884	ENSG00000117505	DR1
ENSDARG00000009342	txndc5	498.628	0.691806	1.6153	0.619078	0.142582	4.85197	1.22239e-06	6.27545e-05	ENSG00000239264	TXNDC5
ENSDARG00000078966	rbm15b	85.6182	0.69057	1.61392	0.619609	0.270482	2.55311	0.0106767	0.0675083	ENSG00000259956	RBM15B
ENSDARG00000005186	sp4	81.3068	0.690291	1.61361	0.619729	0.243076	2.83982	0.00451396	0.0365215
ENSDARG00000077537	nudt19	58.6692	0.689875	1.61314	0.619907	0.253882	2.71731	0.00658159	0.0477181	ENSG00000213965	NUDT19
ENSDARG00000018902	pes	179.796	0.689578	1.61281	0.620035	0.193449	3.56464	0.000364349	0.00567773	ENSG00000100029	PES1
ENSDARG00000077410	myo9b	193.612	0.68938	1.61259	0.62012	0.191028	3.60879	0.000307624	0.00498192	ENSG00000099331	MYO9B
ENSDARG00000080018	kif16bb	78.3753	0.688762	1.6119	0.620386	0.258683	2.66258	0.00775446	0.0535871
ENSDARG00000052344	tbl3	97.1465	0.687904	1.61094	0.620755	0.229241	3.0008	0.00269275	0.0252672	ENSG00000183751	TBL3
ENSDARG00000040492	mthfd1b	361.659	0.687836	1.61087	0.620784	0.160151	4.29492	1.74753e-05	0.00053883
ENSDARG00000061039	atp10a	82.1565	0.686379	1.60924	0.621411	0.259417	2.64585	0.00814853	0.0554764	ENSG00000206190	ATP10A
ENSDARG00000056307	znf706	196.435	0.685002	1.6077	0.622005	0.184231	3.71817	0.000200672	0.00360399	ENSG00000120963	ZNF706
ENSDARG00000078473	nucks1a	269.766	0.684233	1.60685	0.622337	0.16412	4.1691	3.05811e-05	0.000835898	ENSG00000069275	NUCKS1
ENSDARG00000058297	timm13	131.321	0.683947	1.60653	0.62246	0.225054	3.03903	0.00237343	0.0230694	ENSG00000099800	TIMM13
ENSDARG00000014311	pgghg	40.8169	0.683659	1.60621	0.622584	0.263127	2.59821	0.00937106	0.0613822	ENSG00000142102	PGGHG
ENSDARG00000020785	lama4	228.962	0.683651	1.6062	0.622588	0.238887	2.86182	0.0042122	0.0348182	ENSG00000112769	LAMA4
ENSDARG00000063419	DHX35	37.8775	0.683142	1.60563	0.622807	0.230725	2.96085	0.00306787	0.027927	ENSG00000101452	DHX35
ENSDARG00000044074	loxl2b	135.781	0.683118	1.60561	0.622818	0.259798	2.62942	0.00855298	0.0574564	ENSG00000134013	LOXL2
ENSDARG00000038585	eif4e2	49.2963	0.682707	1.60515	0.622995	0.283567	2.40757	0.0160593	0.0884135	ENSG00000135930	EIF4E2
ENSDARG00000042467	tlk1a	179.793	0.682324	1.60472	0.623161	0.284751	2.39621	0.0165656	0.0901005	ENSG00000198586	TLK1
ENSDARG00000067560	gtf2h3	18.9772	0.682188	1.60457	0.623219	0.237757	2.86927	0.00411422	0.0341759	ENSG00000111358	GTF2H3
ENSDARG00000098592	zgc:92140	65.735	0.682163	1.60454	0.62323	0.278688	2.44777	0.0143744	0.0822495	ENSG00000116667	C1orf21
ENSDARG00000074757	arv1	38.6427	0.682099	1.60447	0.623258	0.275591	2.47504	0.0133222	0.0785721	ENSG00000173409	ARV1
ENSDARG00000079605	prmt5	161.157	0.681962	1.60432	0.623317	0.246009	2.77211	0.0055695	0.0423035	ENSG00000100462	PRMT5
ENSDARG00000035147	lrwd1	30.9564	0.681569	1.60388	0.623487	0.281205	2.42375	0.0153613	0.0856905	ENSG00000161036	LRWD1
ENSDARG00000099999	tcf3b	112.677	0.680087	1.60224	0.624128	0.198259	3.43029	0.000602932	0.00835881	ENSG00000071564	TCF3
ENSDARG00000033444	map4k6	30.2121	0.679786	1.6019	0.624258	0.275647	2.46615	0.0136574	0.0798635	ENSG00000168067	MAP4K2
ENSDARG00000099022	faua	727.55	0.679495	1.60158	0.624384	0.244832	2.77536	0.0055141	0.042039	ENSG00000149806	FAU
ENSDARG00000103337	rrp1	229.489	0.67889	1.60091	0.624646	0.251412	2.7003	0.00692763	0.0493746	ENSG00000160214	RRP1
ENSDARG00000057113	c6	172.59	0.678346	1.6003	0.624881	0.228995	2.96227	0.00305382	0.027887	ENSG00000039537	C6
ENSDARG00000053152	pcmtd1	44.2773	0.678163	1.6001	0.624961	0.289323	2.34396	0.0190802	0.0992889	ENSG00000168300	PCMTD1
ENSDARG00000037122		38.0188	0.676985	1.59879	0.625471	0.260832	2.59548	0.00944581	0.0618119
ENSDARG00000098080	gnl2	183.146	0.675501	1.59715	0.626115	0.241276	2.7997	0.00511496	0.0399461	ENSG00000134697	GNL2
ENSDARG00000037073	si:dkey-60a16.1	22.3279	0.674727	1.59629	0.626451	0.242658	2.78057	0.00542634	0.0417157
ENSDARG00000103163	tomm20a	133.752	0.674521	1.59607	0.62654	0.196582	3.43125	0.000600812	0.00834085	ENSG00000173726	TOMM20
ENSDARG00000051783	rplp0	5313.59	0.674069	1.59557	0.626737	0.243119	2.77259	0.00556127	0.0422569	ENSG00000089157	RPLP0
ENSDARG00000013990	ube2q2	118.119	0.673701	1.59516	0.626896	0.161763	4.16475	3.11689e-05	0.000847383	ENSG00000160714	UBE2Q1
ENSDARG00000073724	nlrx1	52.4841	0.673472	1.59491	0.626996	0.190045	3.54375	0.000394478	0.00600384	ENSG00000160703	NLRX1
ENSDARG00000058267	glmna	36.2324	0.67345	1.59488	0.627005	0.20911	3.22056	0.0012794	0.0147288	ENSG00000174842	GLMN
ENSDARG00000015971	rapgef1b	99.7199	0.672978	1.59436	0.627211	0.274668	2.45015	0.0142799	0.0818936
ENSDARG00000071082	p4ha1b	98.6031	0.672883	1.59426	0.627252	0.252426	2.66567	0.00768351	0.0532788	ENSG00000122884	P4HA1
ENSDARG00000079631	si:ch211-113e8.10	64.5945	0.672794	1.59416	0.62729	0.212688	3.16329	0.00155998	0.0169826	ENSG00000186660	ZFP91
ENSDARG00000043446	efhd1	39.2178	0.670795	1.59195	0.628161	0.272622	2.46053	0.0138733	0.080706	ENSG00000115468	EFHD1
ENSDARG00000043431	b3gntl1	28.9971	0.670552	1.59168	0.628266	0.283486	2.36538	0.0180114	0.0952962	ENSG00000175711	B3GNTL1
ENSDARG00000023058	foxo3a	85.1878	0.670049	1.59113	0.628485	0.26026	2.57454	0.0100373	0.0647636	ENSG00000118689	FOXO3
ENSDARG00000019280	larsb	168.539	0.669979	1.59105	0.628516	0.181839	3.68447	0.000229181	0.00402508	ENSG00000133706	LARS
ENSDARG00000102607	pmpca	133.223	0.669191	1.59018	0.628859	0.196761	3.40104	0.00067131	0.00908875	ENSG00000165688	PMPCA
ENSDARG00000007804	gas6	57.1013	0.669091	1.59007	0.628903	0.228022	2.93433	0.00334267	0.0295545	ENSG00000183087	GAS6
ENSDARG00000026630	mark3b	123.699	0.668555	1.58948	0.629137	0.222606	3.00331	0.00267062	0.0251366	ENSG00000075413	MARK3
ENSDARG00000077372	tfr1b	418.293	0.66818	1.58907	0.6293	0.21685	3.0813	0.00206097	0.0208959	ENSG00000072274	TFRC
ENSDARG00000100715	tlk1b	155.479	0.668097	1.58898	0.629336	0.160268	4.16861	3.0646e-05	0.000836539	ENSG00000198586	TLK1
ENSDARG00000031048	gspt1	102.242	0.667222	1.58801	0.629718	0.274546	2.43028	0.0150873	0.0847934	ENSG00000103342	GSPT1
ENSDARG00000053166	chic1	21.4054	0.666498	1.58722	0.630034	0.242646	2.74679	0.00601819	0.0447372	ENSG00000204116	CHIC1
ENSDARG00000003207	mterf3	36.2655	0.664161	1.58465	0.631056	0.279777	2.37389	0.0176018	0.0938655	ENSG00000156469	MTERF3
ENSDARG00000006128	cep170aa	59.6001	0.663886	1.58434	0.631176	0.181916	3.64941	0.000262842	0.00446177	ENSG00000143702	CEP170
ENSDARG00000068971	mex3c	22.8628	0.663717	1.58416	0.63125	0.251511	2.63892	0.00831718	0.0564157
ENSDARG00000063276	msh3	46.1568	0.663506	1.58393	0.631342	0.219546	3.02218	0.00250964	0.0241121	ENSG00000113318	MSH3
ENSDARG00000063187	agpat5	107.339	0.663226	1.58362	0.631465	0.194685	3.40667	0.000657607	0.00895718	ENSG00000155189	AGPAT5
ENSDARG00000044575	vars	241.923	0.662713	1.58306	0.631689	0.200645	3.30291	0.000956881	0.0119622	ENSG00000204394	VARS
ENSDARG00000103991	CABZ01074398.1	42.2475	0.661956	1.58223	0.632021	0.276508	2.39398	0.0166667	0.0904283	ENSG00000129657	SEC14L1
ENSDARG00000059337	tgif1	108.444	0.661307	1.58151	0.632305	0.215487	3.06889	0.00214857	0.0214265	ENSG00000177426	TGIF1
ENSDARG00000056691	cpeb4a	142.529	0.660508	1.58064	0.632656	0.246929	2.67489	0.0074754	0.0521576	ENSG00000113742	CPEB4
ENSDARG00000040713	rbbp9	64.1141	0.660367	1.58048	0.632717	0.274944	2.40182	0.0163136	0.0892548	ENSG00000089050	RBBP9
ENSDARG00000045123	oplah	91.021	0.660343	1.58046	0.632728	0.218031	3.02867	0.00245636	0.0237385	ENSG00000178814	OPLAH
ENSDARG00000005540	xpo7	183.095	0.660024	1.58011	0.632868	0.19036	3.46725	0.000525819	0.00748996	ENSG00000130227	XPO7
ENSDARG00000075083	prkdc	175.887	0.659717	1.57977	0.633002	0.14495	4.55133	5.3307e-06	0.000211835	ENSG00000253729	PRKDC
ENSDARG00000038737	phf20b	118.593	0.659266	1.57928	0.6332	0.208742	3.15828	0.00158704	0.0171847	ENSG00000025293	PHF20
ENSDARG00000091079		100.025	0.659145	1.57915	0.633253	0.274687	2.39962	0.016412	0.0895863	ENSG00000156928	MALSU1
ENSDARG00000061140	colec12	98.5965	0.65859	1.57854	0.633497	0.27474	2.39714	0.0165236	0.0900141	ENSG00000158270	COLEC12
ENSDARG00000009499	syne1a	106.185	0.658352	1.57828	0.633602	0.227645	2.89201	0.00382787	0.0325891	ENSG00000131018	SYNE1
ENSDARG00000000935	unk	38.5179	0.65798	1.57787	0.633765	0.265582	2.47751	0.0132304	0.0782034	ENSG00000132478	UNK
ENSDARG00000090988	larsa	36.4203	0.656317	1.57605	0.634496	0.254738	2.57644	0.00998241	0.0644887	ENSG00000133706	LARS
ENSDARG00000010516	rpl21	1241.66	0.655401	1.57505	0.634899	0.266756	2.45693	0.0140128	0.0810284	ENSG00000122026	RPL21
ENSDARG00000019222	mrpl24	62.7168	0.654506	1.57408	0.635293	0.238811	2.74068	0.00613118	0.0453107	ENSG00000143314	MRPL24
ENSDARG00000004687	acaa1	215.196	0.653886	1.5734	0.635566	0.258167	2.5328	0.0113154	0.0703134	ENSG00000060971	ACAA1
ENSDARG00000044134	iars2	115.758	0.653531	1.57301	0.635723	0.203592	3.21	0.00132735	0.01516	ENSG00000067704	IARS2
ENSDARG00000053912	fbl	269.014	0.653081	1.57252	0.635921	0.205033	3.18524	0.00144633	0.0160763	ENSG00000105202	FBL
ENSDARG00000052139	notch3	222.252	0.652441	1.57183	0.636203	0.194528	3.35398	0.000796595	0.010456	ENSG00000074181	NOTCH3
ENSDARG00000009677	dlg1	74.2584	0.652033	1.57138	0.636383	0.164223	3.97041	7.17479e-05	0.00161816	ENSG00000075711	DLG1
ENSDARG00000057218	tbc1d15	54.8221	0.651794	1.57112	0.636489	0.203858	3.19729	0.00138724	0.0156097	ENSG00000121749	TBC1D15
ENSDARG00000060748	tsfm	53.7774	0.651741	1.57106	0.636512	0.250468	2.6021	0.00926558	0.0609677	ENSG00000123297	TSFM
ENSDARG00000003144	pxmp2	67.0872	0.650829	1.57007	0.636914	0.272834	2.38543	0.017059	0.0919157	ENSG00000176894	PXMP2
ENSDARG00000014068	pgam1b	229.203	0.64992	1.56908	0.637316	0.151957	4.27698	1.89442e-05	0.000573629	ENSG00000226784	PGAM4
ENSDARG00000074435	ttc19	32.5844	0.649763	1.56891	0.637385	0.267052	2.4331	0.0149702	0.0844636	ENSG00000011295	TTC19
ENSDARG00000063140	exd3	47.7087	0.648224	1.56724	0.638065	0.218882	2.96152	0.00306128	0.027922	ENSG00000187609	EXD3
ENSDARG00000044556	pacs1a	39.6709	0.64734	1.56628	0.638456	0.245999	2.63148	0.00850138	0.0572959	ENSG00000175115	PACS1
ENSDARG00000025754	ube2f	80.533	0.645993	1.56482	0.639053	0.159798	4.04256	5.28717e-05	0.00128076	ENSG00000258984	UBE2F-SCLY
ENSDARG00000104709	sprtn	73.7524	0.645405	1.56418	0.639313	0.272045	2.37242	0.017672	0.093992	ENSG00000010072	SPRTN
ENSDARG00000018325	taf5	68.4379	0.644319	1.563	0.639795	0.187749	3.43182	0.000599553	0.00832909	ENSG00000148835	TAF5
ENSDARG00000062531	mapk8ip3	47.1289	0.644251	1.56293	0.639825	0.255632	2.52023	0.011728	0.0719944	ENSG00000138834	MAPK8IP3
ENSDARG00000077114	arhgef16	82.8269	0.643772	1.56241	0.640037	0.206329	3.12012	0.00180775	0.0189262	ENSG00000130762	ARHGEF16
ENSDARG00000087937	cdk4	84.6253	0.643598	1.56222	0.640114	0.269762	2.3858	0.0170421	0.0918624	ENSG00000135446	CDK4
ENSDARG00000011570	pou6f1	31.1788	0.639911	1.55823	0.641752	0.228269	2.80332	0.00505791	0.039669	ENSG00000184271	POU6F1
ENSDARG00000078077	dph2	49.2176	0.638956	1.5572	0.642178	0.268556	2.37922	0.0173492	0.0930334	ENSG00000132768	DPH2
ENSDARG00000038537	gga1	139.035	0.638871	1.55711	0.642215	0.141838	4.50424	6.66098e-06	0.000249907	ENSG00000100083	GGA1
ENSDARG00000101256	CABZ01085052.1	336.56	0.63859	1.55681	0.64234	0.223678	2.85495	0.0043043	0.0352625	ENSG00000114867	EIF4G1
ENSDARG00000103923	tfap4	49.0314	0.63814	1.55632	0.642541	0.203546	3.13511	0.00171791	0.018235	ENSG00000090447	TFAP4
ENSDARG00000015427	hdac1	549.188	0.637923	1.55609	0.642637	0.15253	4.18228	2.88599e-05	0.000797369	ENSG00000116478	HDAC1
ENSDARG00000018206	nck2a	45.8452	0.637767	1.55592	0.642707	0.249533	2.55584	0.0105932	0.067128	ENSG00000071051	NCK2
ENSDARG00000001873	phgdh	81.9945	0.63762	1.55576	0.642772	0.262665	2.4275	0.0152032	0.0852077	ENSG00000092621	PHGDH
ENSDARG00000104353	nop58	339.926	0.636488	1.55454	0.643277	0.24845	2.56183	0.0104122	0.0662913	ENSG00000055044	NOP58
ENSDARG00000045692	pphln1	58.3699	0.635014	1.55295	0.643934	0.214807	2.95621	0.0031144	0.0282489	ENSG00000134283	PPHLN1
ENSDARG00000041708	csrp2bp	91.1162	0.634701	1.55262	0.644074	0.254649	2.49245	0.0126864	0.0758297	ENSG00000149474	KAT14
ENSDARG00000063466	isy1	82.2831	0.634406	1.5523	0.644206	0.177266	3.57883	0.000345133	0.005457	ENSG00000261796	ISY1-RAB43
ENSDARG00000037506	prps1b	38.4831	0.634383	1.55227	0.644216	0.257369	2.46488	0.0137061	0.0800557	ENSG00000229937	PRPS1L1
ENSDARG00000037410	med28	31.1431	0.63437	1.55226	0.644222	0.221614	2.8625	0.00420315	0.0347576	ENSG00000118579	MED28
ENSDARG00000089886	si:dkey-19e4.5	58.9554	0.634197	1.55207	0.644299	0.2057	3.08311	0.00204849	0.0208006
ENSDARG00000087596	si:ch73-95l15.5	169.994	0.634064	1.55193	0.644359	0.232548	2.72659	0.00639916	0.0467615
ENSDARG00000061114	PARG	147.099	0.633363	1.55118	0.644672	0.175945	3.59977	0.0003185	0.00512107	ENSG00000227345	PARG
ENSDARG00000003462	fech	60.6536	0.631694	1.54938	0.645418	0.207304	3.04719	0.00230993	0.0226043	ENSG00000066926	FECH
ENSDARG00000089009	frmpd1b	25.4133	0.631124	1.54877	0.645673	0.226985	2.78046	0.00542818	0.0417157	ENSG00000070601	FRMPD1
ENSDARG00000005210	coro2a	74.6306	0.631103	1.54875	0.645683	0.245205	2.57378	0.0100595	0.0648302	ENSG00000106789	CORO2A
ENSDARG00000075933	cox15	48.5116	0.63073	1.54835	0.645849	0.250833	2.51454	0.0119188	0.0728784	ENSG00000014919	COX15
ENSDARG00000022410	rrp12	337.735	0.630659	1.54827	0.645881	0.173784	3.62899	0.000284536	0.00469822	ENSG00000052749	RRP12
ENSDARG00000043185	mllt1a	95.3839	0.630526	1.54813	0.645941	0.269101	2.34309	0.0191249	0.0994703	ENSG00000130382	MLLT1
ENSDARG00000022895	mcf2a	10.2675	0.630282	1.54787	0.64605	0.268492	2.34749	0.0189006	0.0986076	ENSG00000101977	MCF2
ENSDARG00000053138	lrrc47	94.2257	0.628534	1.54599	0.646833	0.210396	2.98739	0.00281369	0.0261306	ENSG00000130764	LRRC47
ENSDARG00000104530		111.583	0.628487	1.54594	0.646854	0.187719	3.34802	0.000813914	0.0106008	ENSG00000180357	ZNF609
ENSDARG00000100206	klhdc4	47.9697	0.62835	1.5458	0.646916	0.226272	2.77697	0.00548676	0.0418979	ENSG00000104731	KLHDC4
ENSDARG00000024381	msto1	50.2661	0.627593	1.54499	0.647255	0.241481	2.59894	0.00935135	0.0613309	ENSG00000125459	MSTO1
ENSDARG00000034187	calm1b	69.8145	0.627539	1.54493	0.64728	0.234459	2.67654	0.00743867	0.052009	ENSG00000198668	CALM1
ENSDARG00000037675	npm1b	44.7622	0.627093	1.54445	0.64748	0.242081	2.59042	0.00958579	0.0624139
ENSDARG00000058538	alcamb	95.1197	0.624421	1.54159	0.64868	0.187459	3.33097	0.000865429	0.0110721	ENSG00000170017	ALCAM
ENSDARG00000037309	gatb	27.3084	0.623682	1.5408	0.649013	0.206476	3.0206	0.00252272	0.0241834	ENSG00000059691	GATB
ENSDARG00000098934	rrp7a	53.1975	0.62355	1.54066	0.649072	0.249513	2.49907	0.012452	0.0749825	ENSG00000189306	RRP7A
ENSDARG00000016470	anxa5b	167.144	0.622103	1.53912	0.649723	0.240847	2.58298	0.00979518	0.0634616	ENSG00000164111	ANXA5
ENSDARG00000015524	prps1a	223.696	0.621479	1.53845	0.650004	0.141226	4.40061	1.07946e-05	0.000362093
ENSDARG00000062178	fam65a	72.9655	0.621239	1.5382	0.650112	0.191084	3.25113	0.00114948	0.013701	ENSG00000039523	RIPOR1
ENSDARG00000061640	sipa1l2	167.513	0.621027	1.53797	0.650208	0.241907	2.56721	0.0102521	0.0656021	ENSG00000116991	SIPA1L2
ENSDARG00000020820	srp68	160.059	0.619003	1.53581	0.651121	0.175168	3.53378	0.000409668	0.00616545	ENSG00000167881	SRP68
ENSDARG00000036056	vrk3	48.1249	0.618265	1.53503	0.651454	0.26149	2.36439	0.0180598	0.0955021	ENSG00000105053	VRK3
ENSDARG00000016477	eif4a2	103.53	0.617317	1.53402	0.651882	0.263682	2.34114	0.0192249	0.099785	ENSG00000156976	EIF4A2
ENSDARG00000100254	zgc:85789	91.0467	0.617158	1.53385	0.651954	0.228851	2.69677	0.00700147	0.0498227	ENSG00000182919	C11orf54
ENSDARG00000045776	cnbpa	271.252	0.615443	1.53203	0.652729	0.172865	3.56026	0.000370487	0.00574681	ENSG00000187969	ZCCHC13
ENSDARG00000060297	arhgap35b	98.2635	0.615339	1.53192	0.652777	0.210737	2.91993	0.00350108	0.0305243
ENSDARG00000003287	wdr12	91.098	0.614202	1.53071	0.653291	0.255126	2.40745	0.0160645	0.0884181	ENSG00000138442	WDR12
ENSDARG00000079625	atr	104.973	0.614106	1.53061	0.653335	0.208578	2.94425	0.00323739	0.0289362	ENSG00000175054	ATR
ENSDARG00000005104	limk2	92.7849	0.61376	1.53024	0.653491	0.211565	2.90104	0.00371923	0.0319574	ENSG00000182541	LIMK2
ENSDARG00000060767	smg7	317.564	0.612802	1.52923	0.653926	0.158203	3.87352	0.000107276	0.00223238	ENSG00000116698	SMG7
ENSDARG00000042509	glod4	24.994	0.612505	1.52891	0.65406	0.251687	2.4336	0.0149496	0.0843861	ENSG00000167699	GLOD4
ENSDARG00000019265	zbtb39	29.3087	0.6121	1.52848	0.654244	0.253117	2.41825	0.0155955	0.0865672	ENSG00000166860	ZBTB39
ENSDARG00000078335	amot	96.0878	0.612035	1.52841	0.654273	0.1903	3.21616	0.00129919	0.0149226	ENSG00000126016	AMOT
ENSDARG00000068981	glceb	81.6157	0.611634	1.52799	0.654455	0.227693	2.68622	0.00722662	0.0508427	ENSG00000138604	GLCE
ENSDARG00000011049	slc17a9b	67.1471	0.610842	1.52715	0.654814	0.240223	2.54281	0.0109966	0.0689484	ENSG00000101194	SLC17A9
ENSDARG00000029146	lrp1ab	608.5	0.610227	1.5265	0.655094	0.184276	3.31149	0.000928012	0.0117034	ENSG00000123384	LRP1
ENSDARG00000053483	zgc:113054	119.232	0.609461	1.52569	0.655442	0.231275	2.63522	0.00840835	0.0569196
ENSDARG00000086411	srsf10b	81.9802	0.608985	1.52519	0.655658	0.243583	2.50011	0.0124153	0.0748509	ENSG00000188529	SRSF10
ENSDARG00000004891	pex19	107.576	0.607973	1.52412	0.656118	0.221524	2.7445	0.00606031	0.0448858	ENSG00000162735	PEX19
ENSDARG00000017115	kctd10	122.284	0.607802	1.52394	0.656196	0.170744	3.55973	0.000371231	0.00574782	ENSG00000110906	KCTD10
ENSDARG00000076318	atp6v1ab	82.4518	0.607708	1.52384	0.656238	0.250318	2.42774	0.0151932	0.0851755	ENSG00000114573	ATP6V1A
ENSDARG00000003941	rrs1	134.715	0.607284	1.52339	0.656431	0.252399	2.40605	0.016126	0.088638	ENSG00000179041	RRS1
ENSDARG00000089893	fam208aa	122.998	0.607269	1.52337	0.656438	0.220922	2.74879	0.00598156	0.0445303	ENSG00000163946	FAM208A
ENSDARG00000030913	cluha	450.599	0.606702	1.52277	0.656696	0.210229	2.88591	0.00390288	0.0329734	ENSG00000132361	CLUH
ENSDARG00000069742	cul5a	93.0087	0.606318	1.52237	0.656871	0.170511	3.55589	0.000376704	0.00579389	ENSG00000166266	CUL5
ENSDARG00000101983	pkn2	115.155	0.60587	1.5219	0.657075	0.251592	2.40814	0.0160339	0.088301	ENSG00000065243	PKN2
ENSDARG00000052182	rbfox2	107.911	0.605499	1.5215	0.657244	0.223221	2.71255	0.00667679	0.0480952	ENSG00000100320	RBFOX2
[truncated: 8,308 more rows]

## Sheet: Mut_test_vs_WT_ovar
gene ID	gene name	baseMean	log2FoldChange	FoldChangeUp	FoldChangeDown	lfcSE	stat	pvalue	padj	human gene ID (multi)	gene name	human gene ID (single)	gene name
[truncated: 18,215 more rows]

[truncated: 5 more sheets: Mut_ovar_vs_WT_test, Mut_ovar_vs_Mut_test, WT_ovar_vs_WT_test, Mut_21d_vs_WT_21d_FDRTool, Mut_35d_vs_WT_35d]
